# Supplementary material
Source: PubMed Central journal article supplement (PMC9116489)

1. SPID: TP0001954B05  
NAME: Sodium tetrafluoroborate  
CAS NO: 13755-29-8

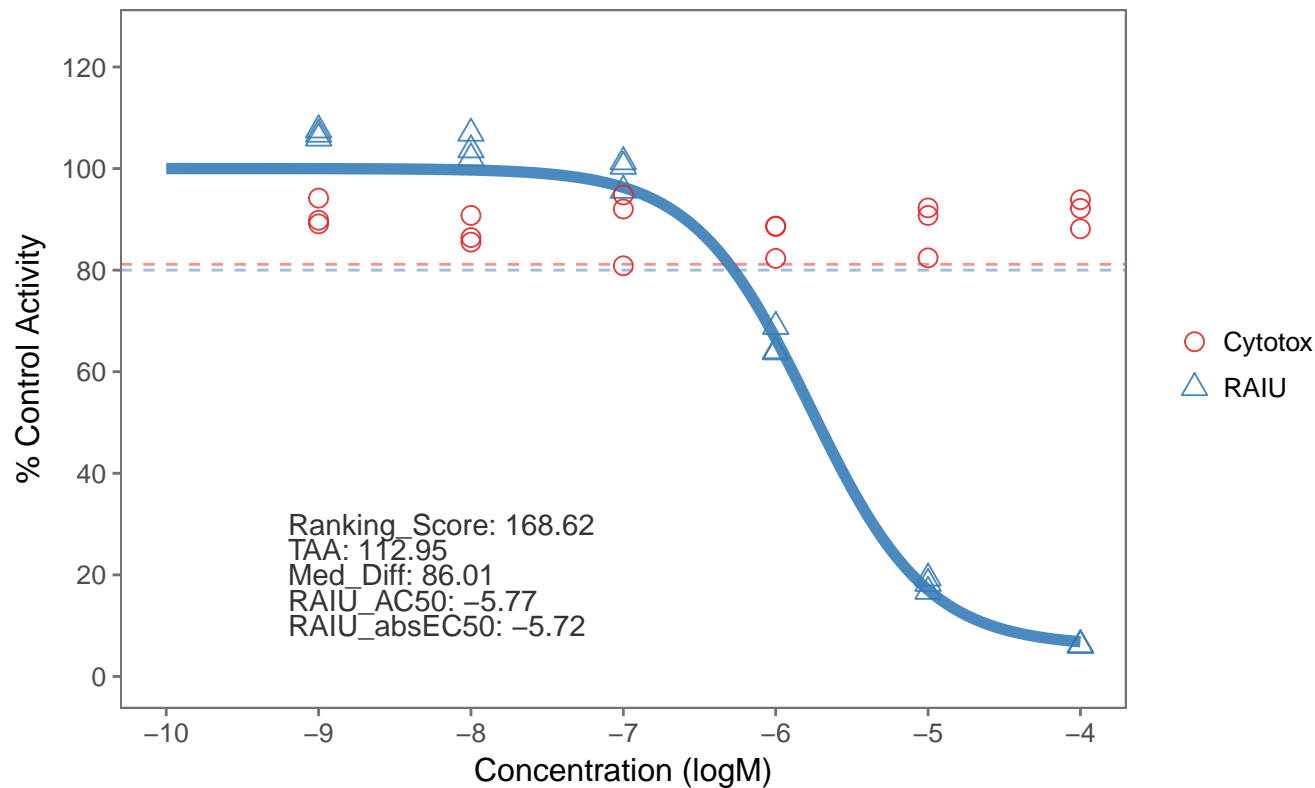

2. SPID: TP0001963B04  
NAME: Digoxin  
CAS NO: 20830-75-5

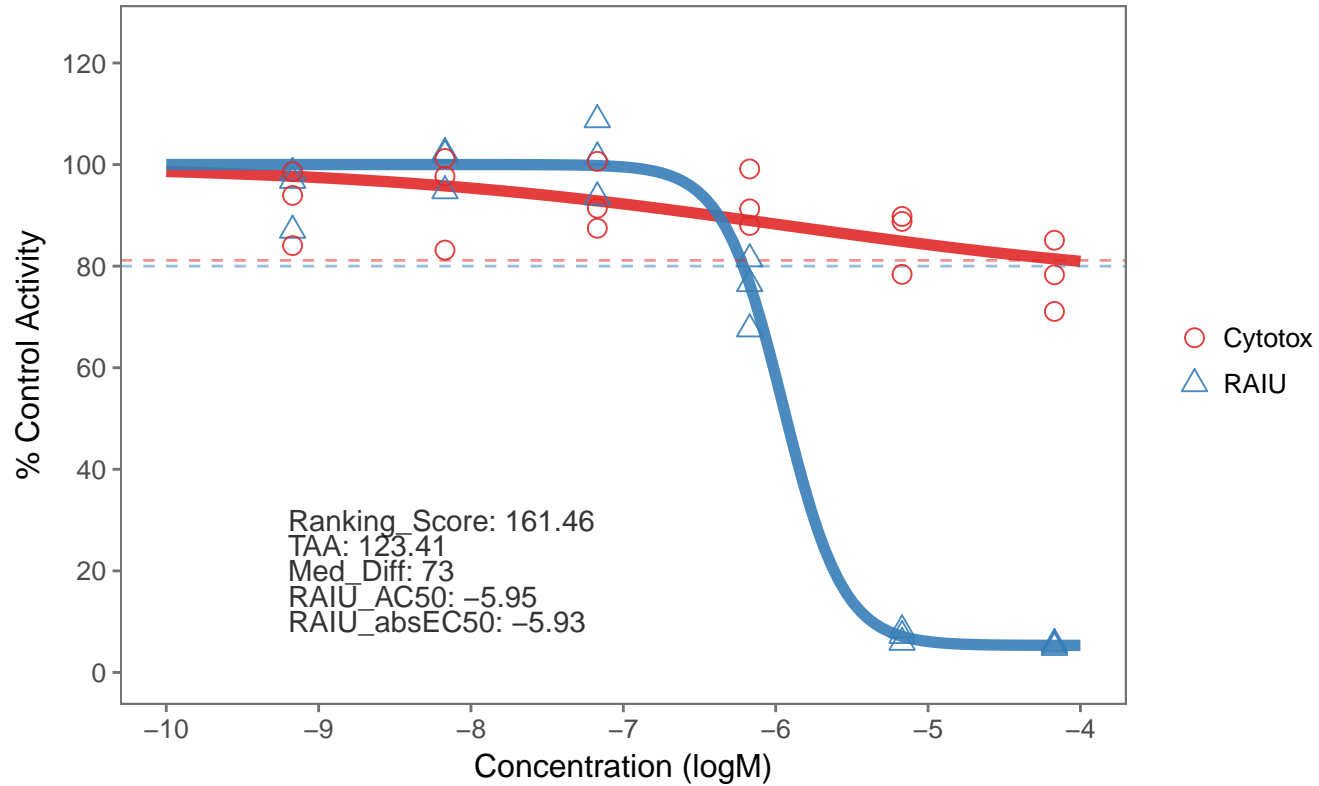

3. SPID: TP0001958G10  
NAME: 1,2-Ethanediamine dihydriodide  
CAS NO: 5700-49-2

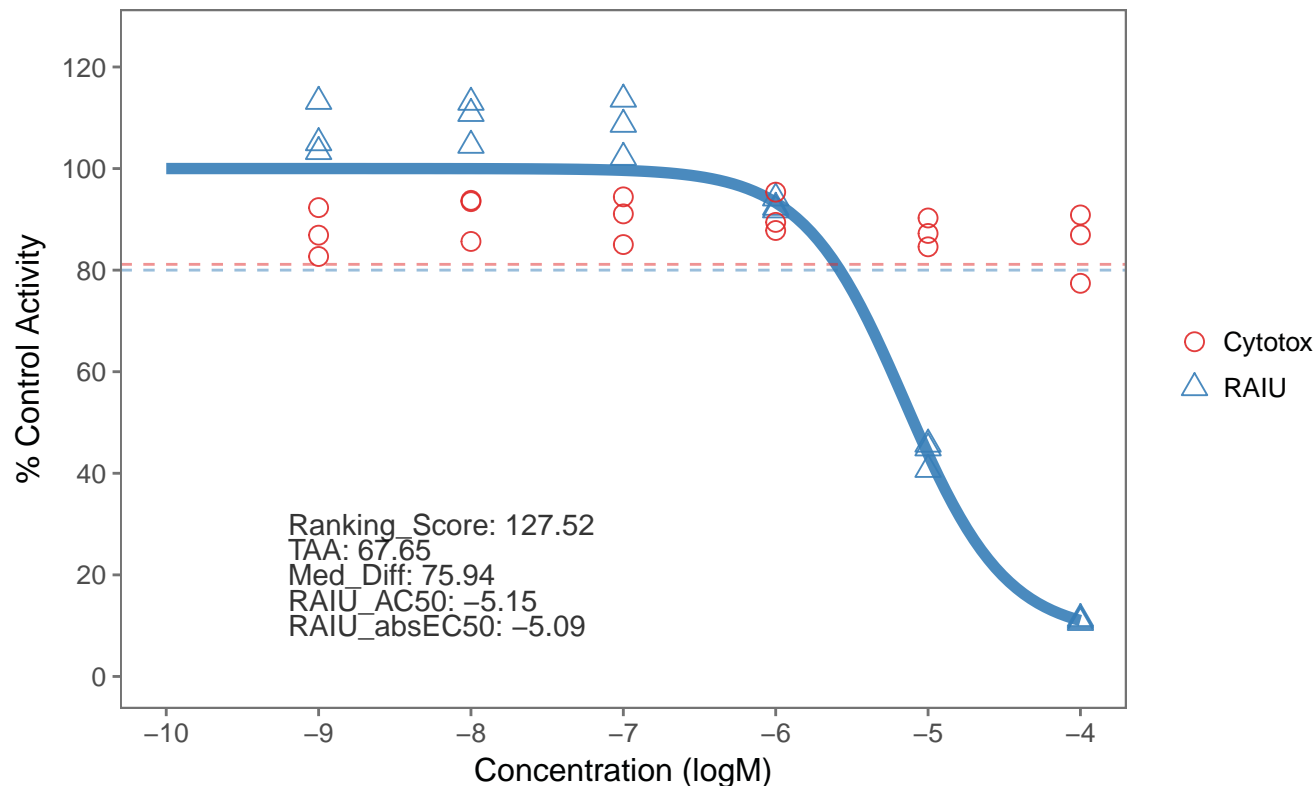

4. SPID: TP0001959B09  
NAME: FD&C Red 3  
CAS NO: 16423-68-0

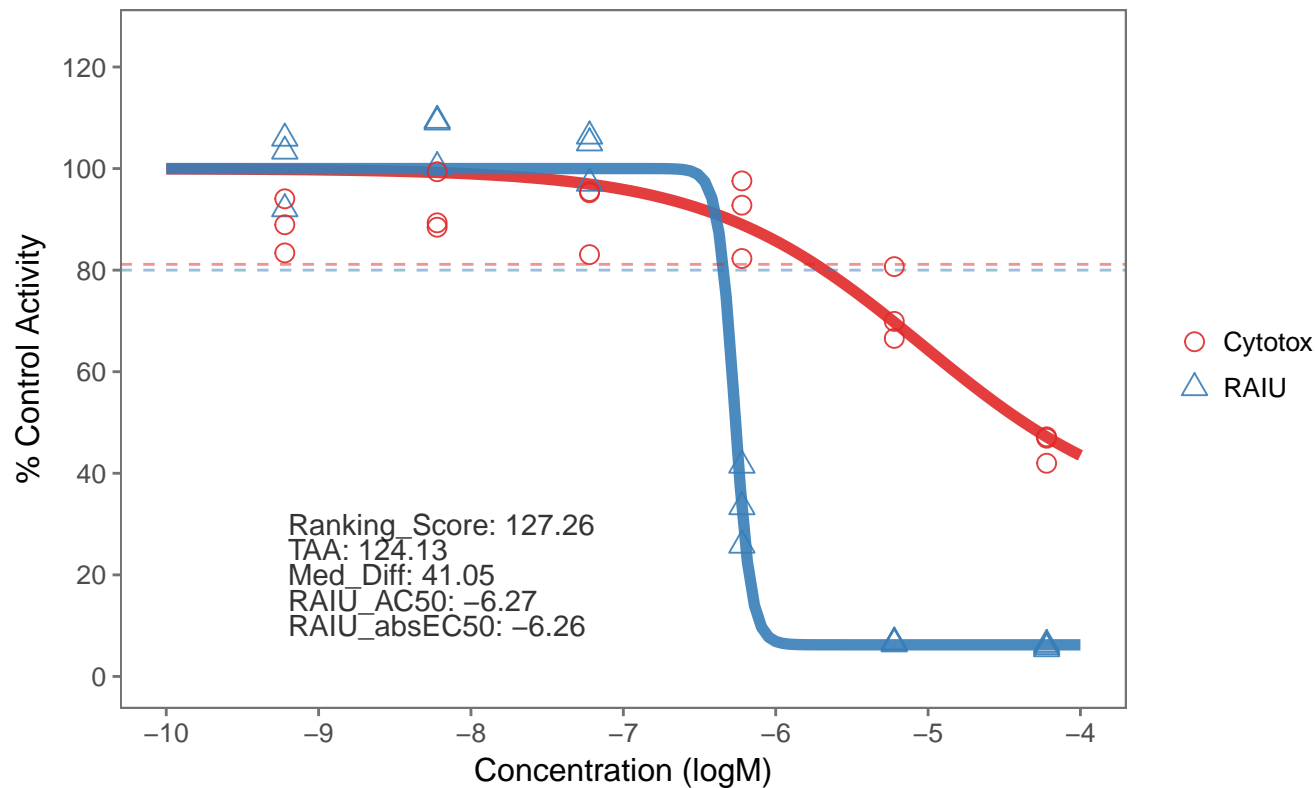

5. SPID: TP0001955D04  
NAME: Sodium iodide  
CAS NO: 7681-82-5

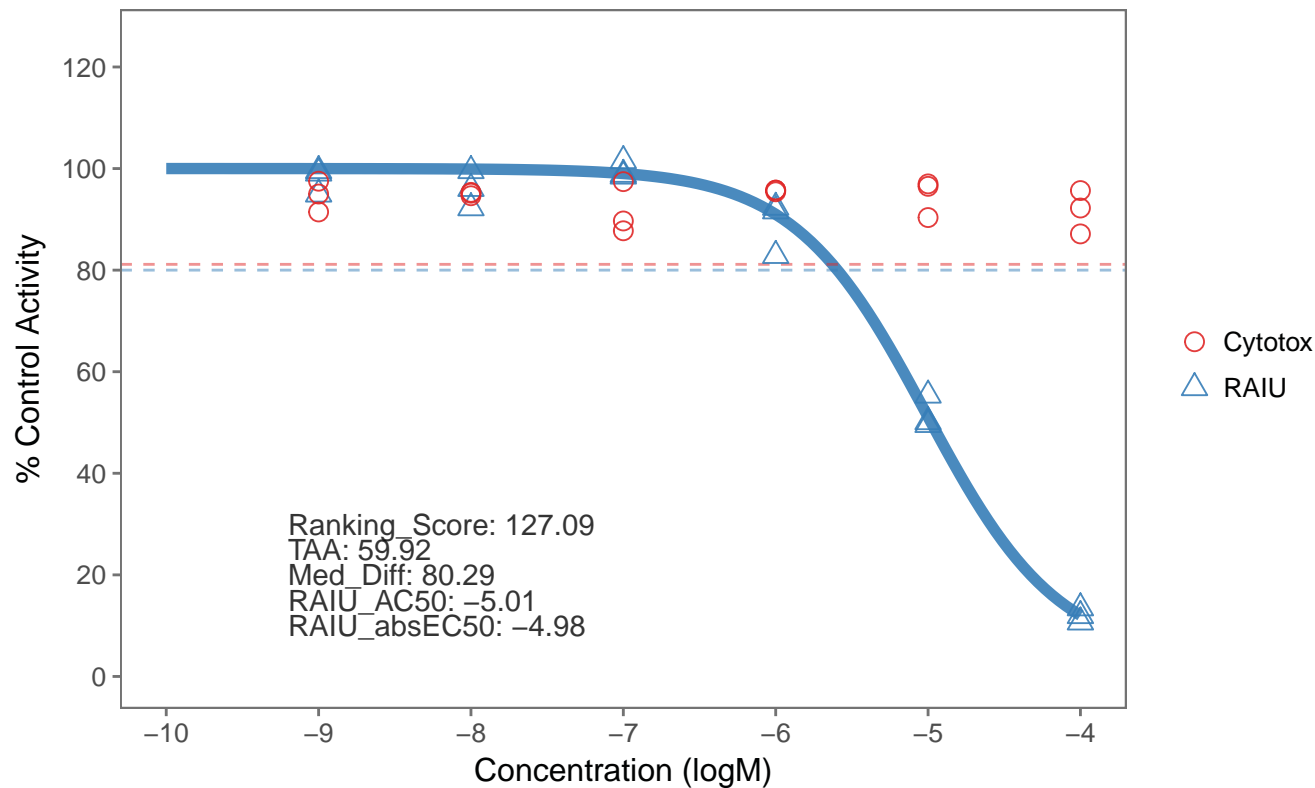

6. SPID: TP0001964D03  
NAME: N-Phenyl-1-naphthylamine  
CAS NO: 90-30-2

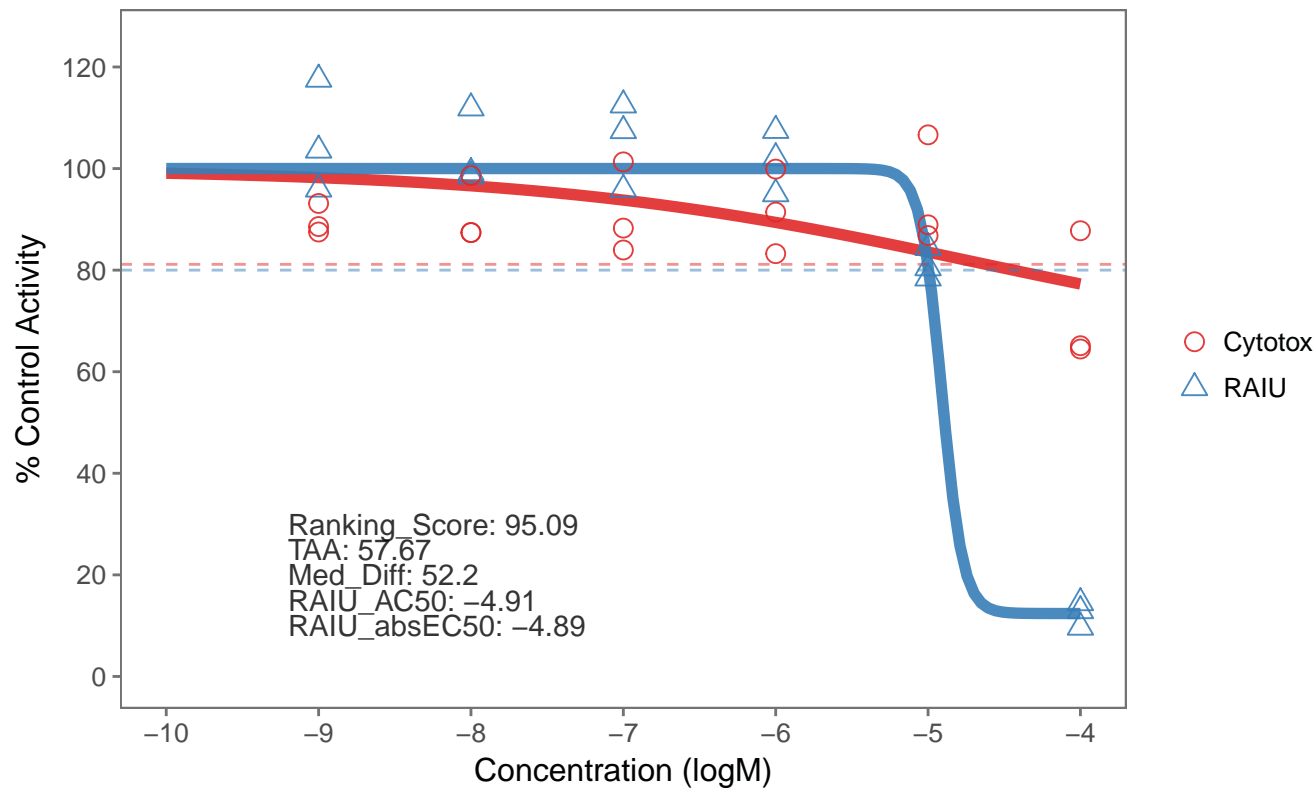

7. SPID: TP0001957D01  
NAME: Perfluorooctanesulfonic acid  
CAS NO: 1763-23-1

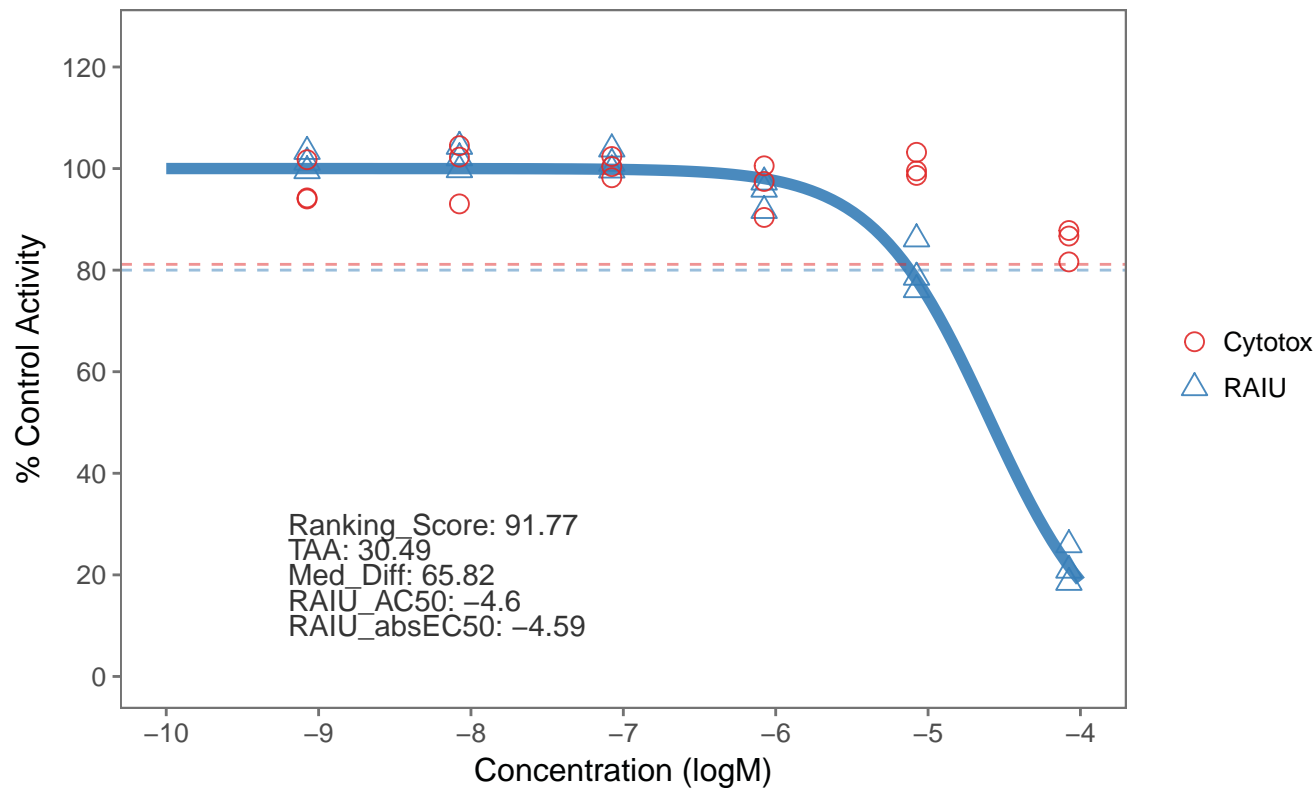

8. SPID: TP0001956E05  
NAME: Perfluorooctanesulfonic acid  
CAS NO: 1763-23-1

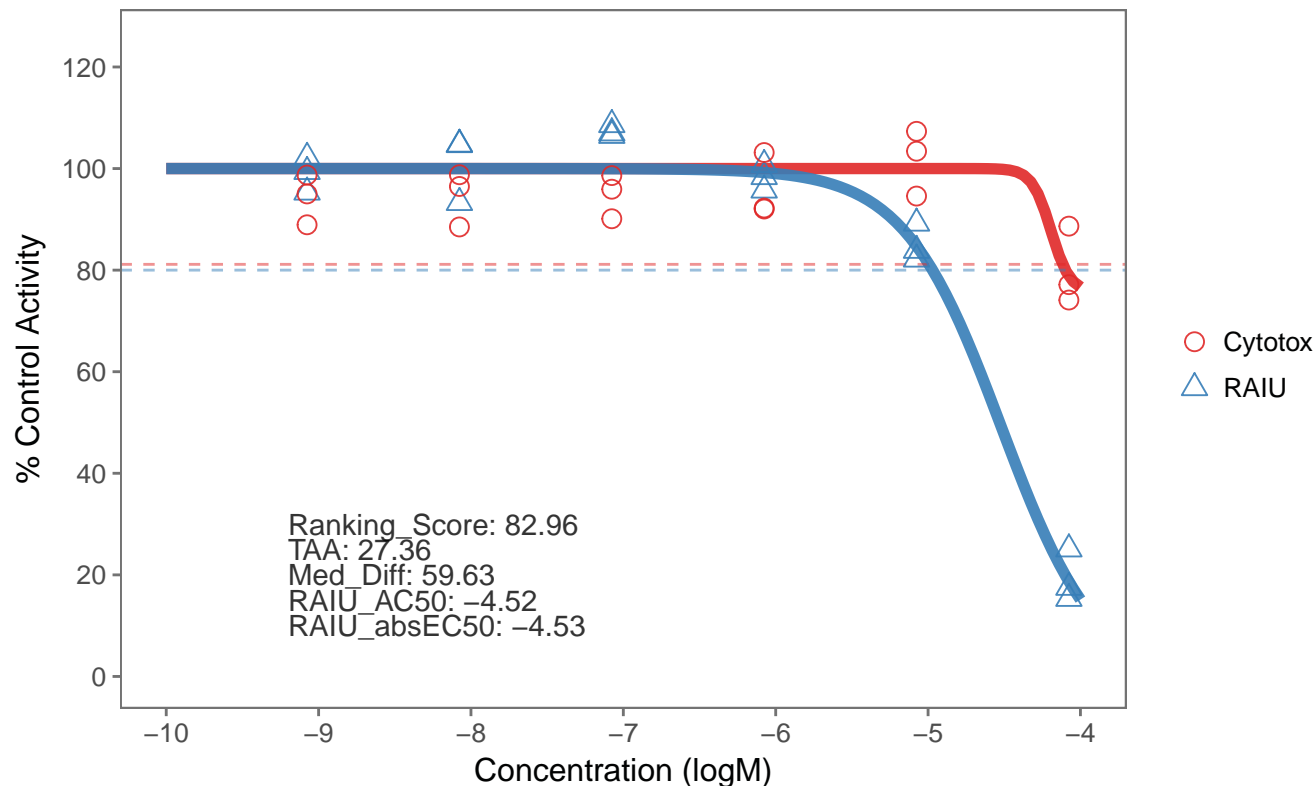



9. SPID: TP0001958D05  
NAME: Chlorfenapyr  
CAS NO: 122453-73-0

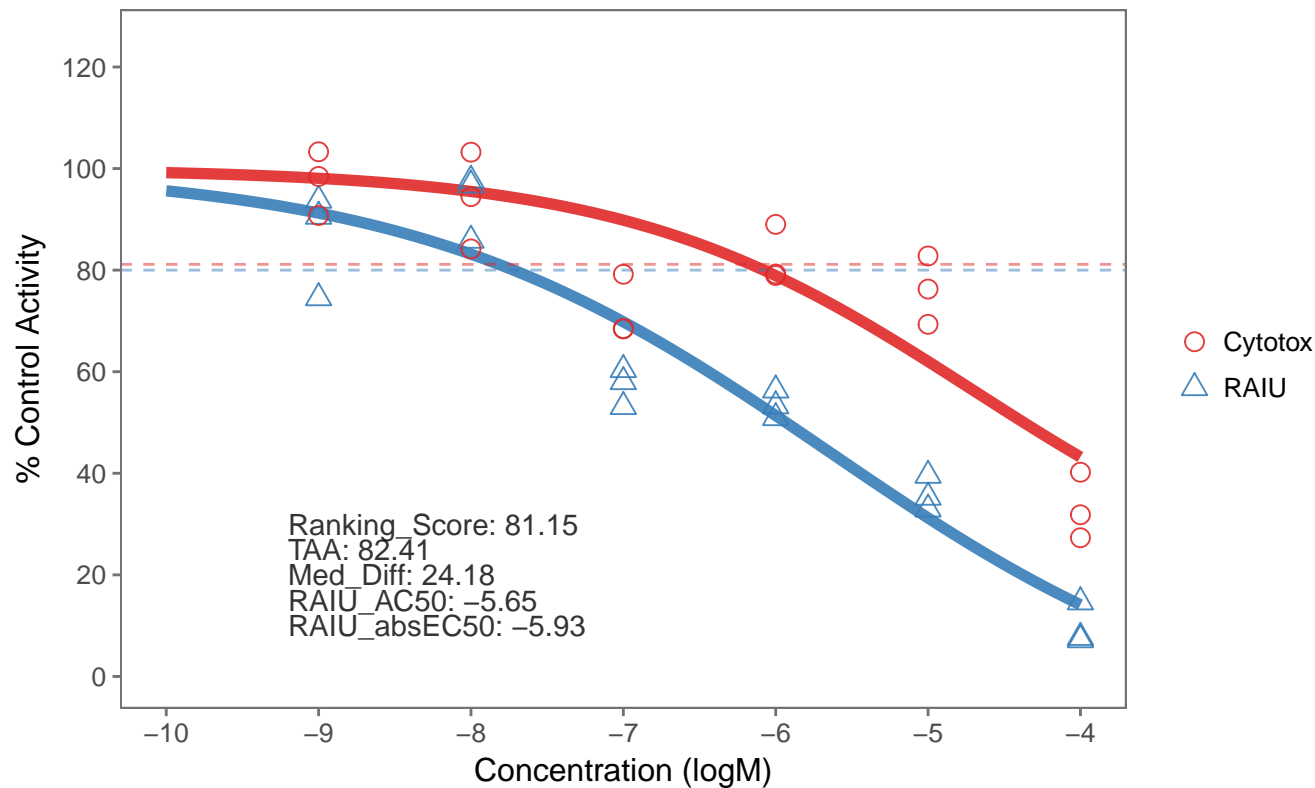

10. SPID: TP0001952C03  
NAME: Thiocyanic acid, ammonium salt  
CAS NO: 1762-95-4

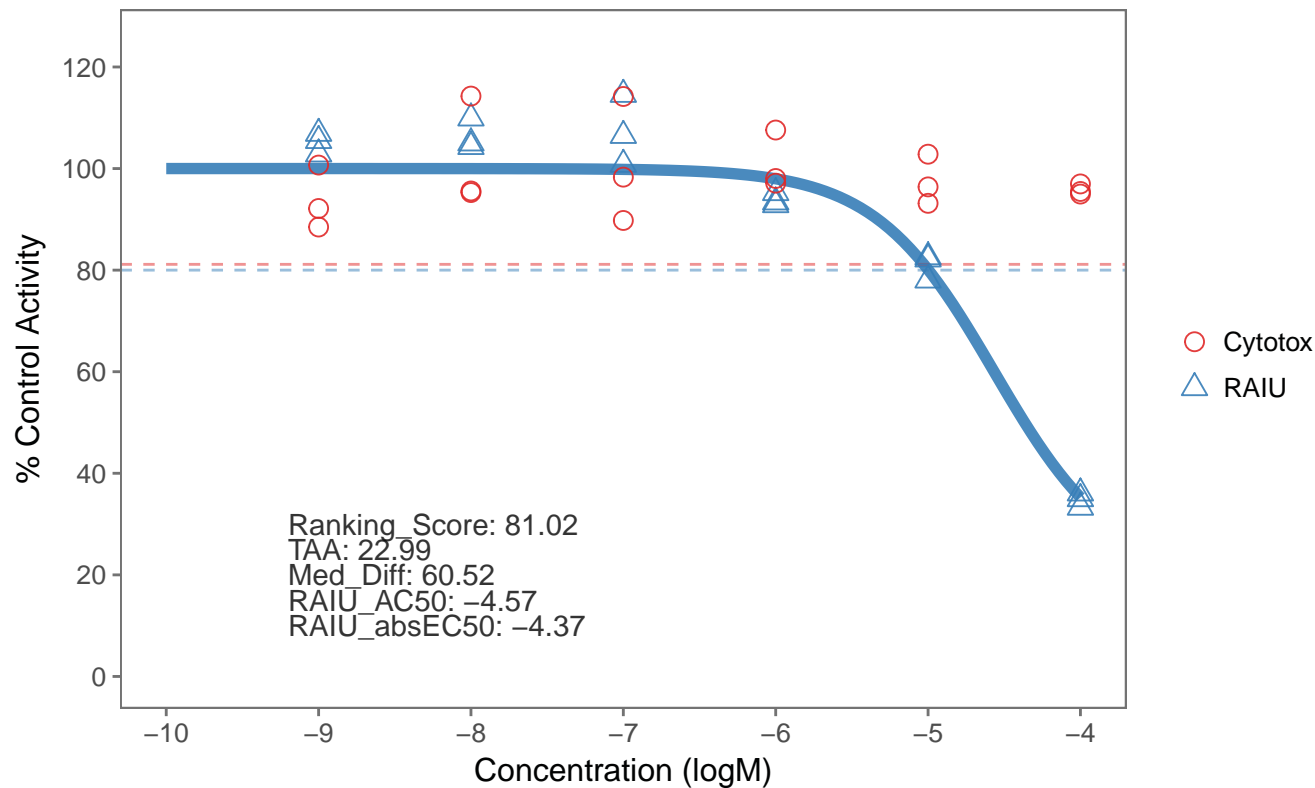

11. SPID: TP0001954G05  
NAME: Sodium decyl sulfate  
CAS NO: 142-87-0

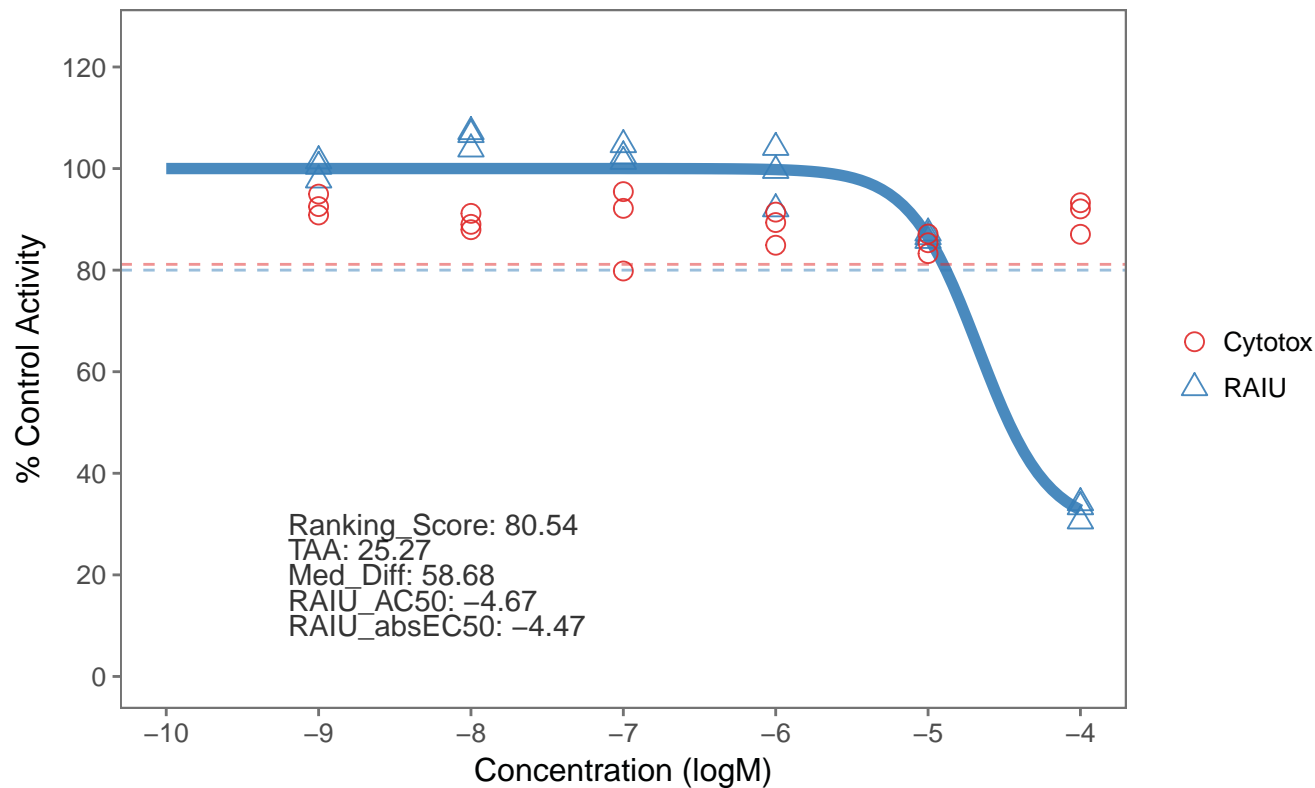

12. SPID: TP0001963E08

NAME: Eosin

CAS NO: 17372-87-1

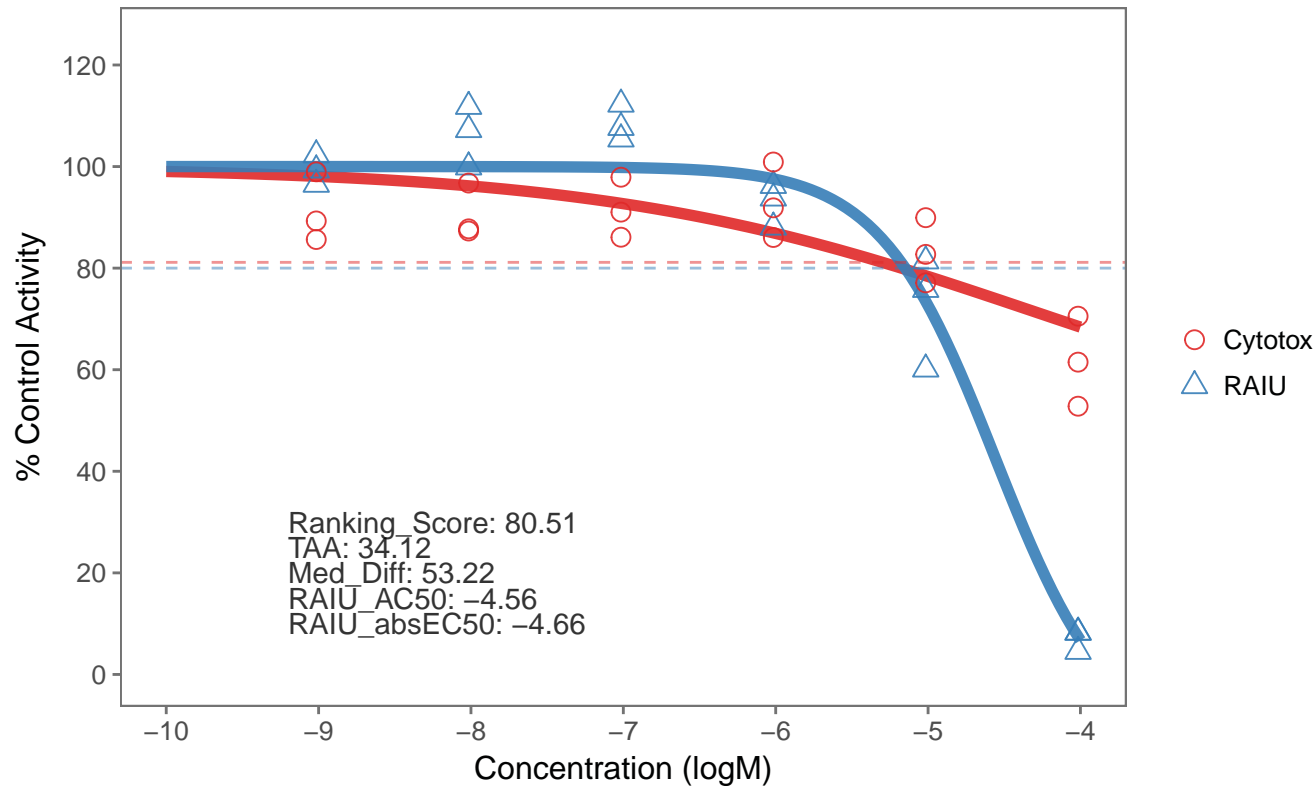

13. SPID: TP0001955G07  
NAME: Dibutyltin dichloride  
CAS NO: 683-18-1

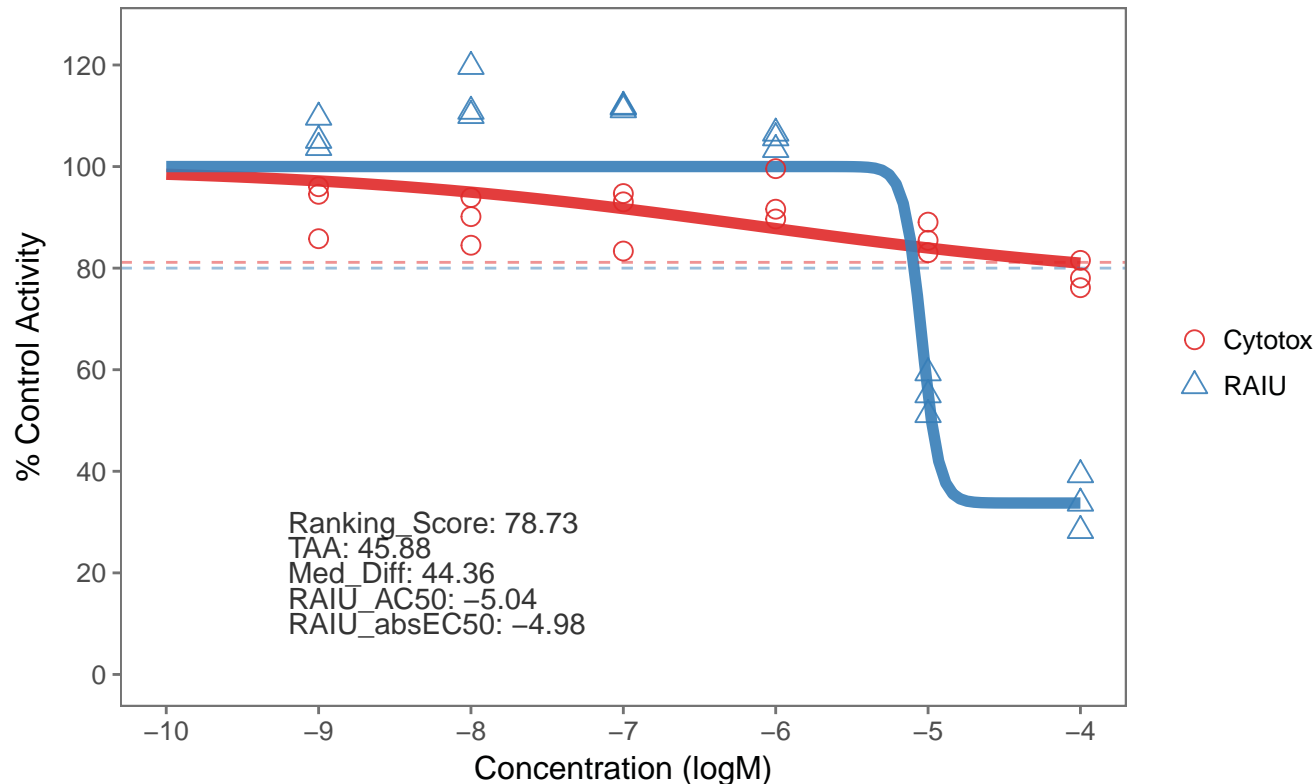

14. SPID: TP0001953C11

NAME: Cybutryne

CAS NO: 28159-98-0

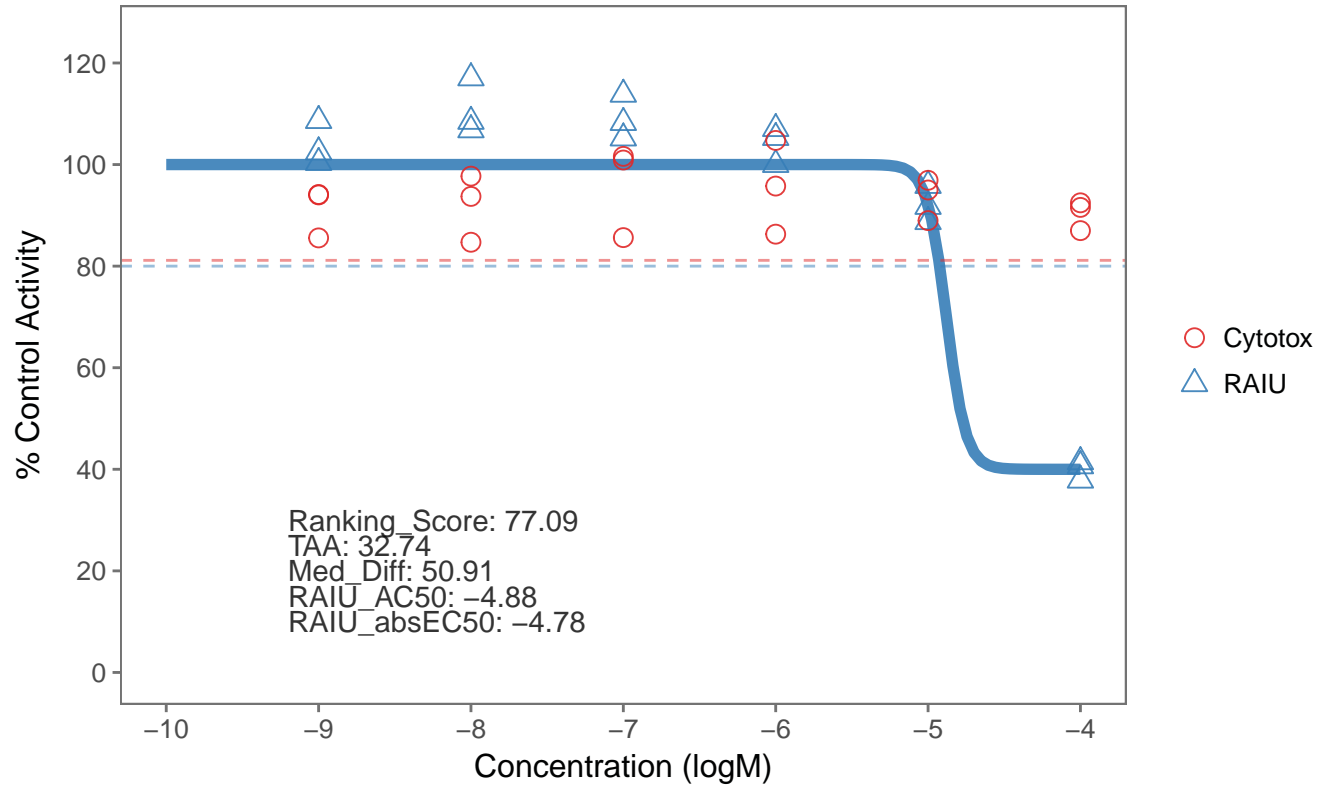

15. SPID: TP0001952D11  
NAME: 5-Chlorosalicylanilide  
CAS NO: 4638-48-6

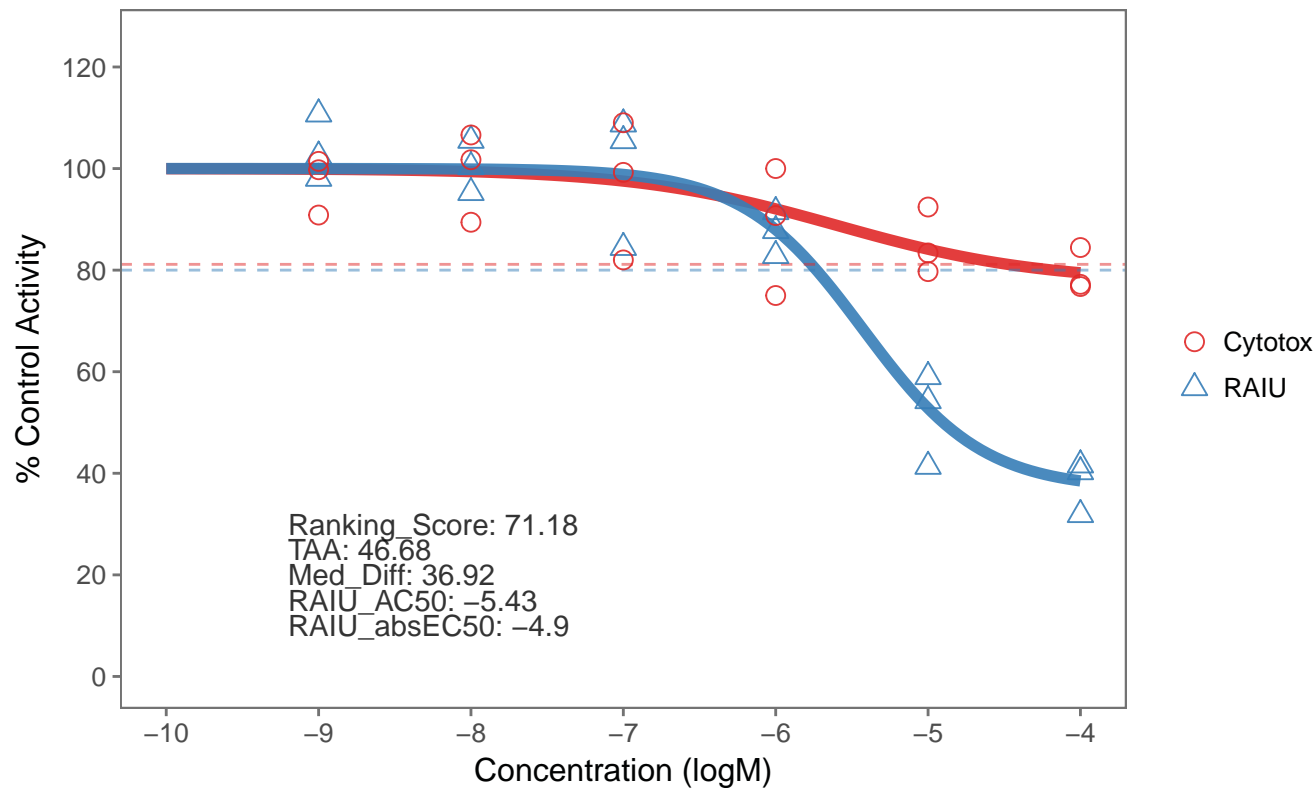

16. SPID: TP0001959E08  
NAME: 4,5-Dichloro-2-octyl-3(2H)-isothiazolone  
CAS NO: 64359-81-5

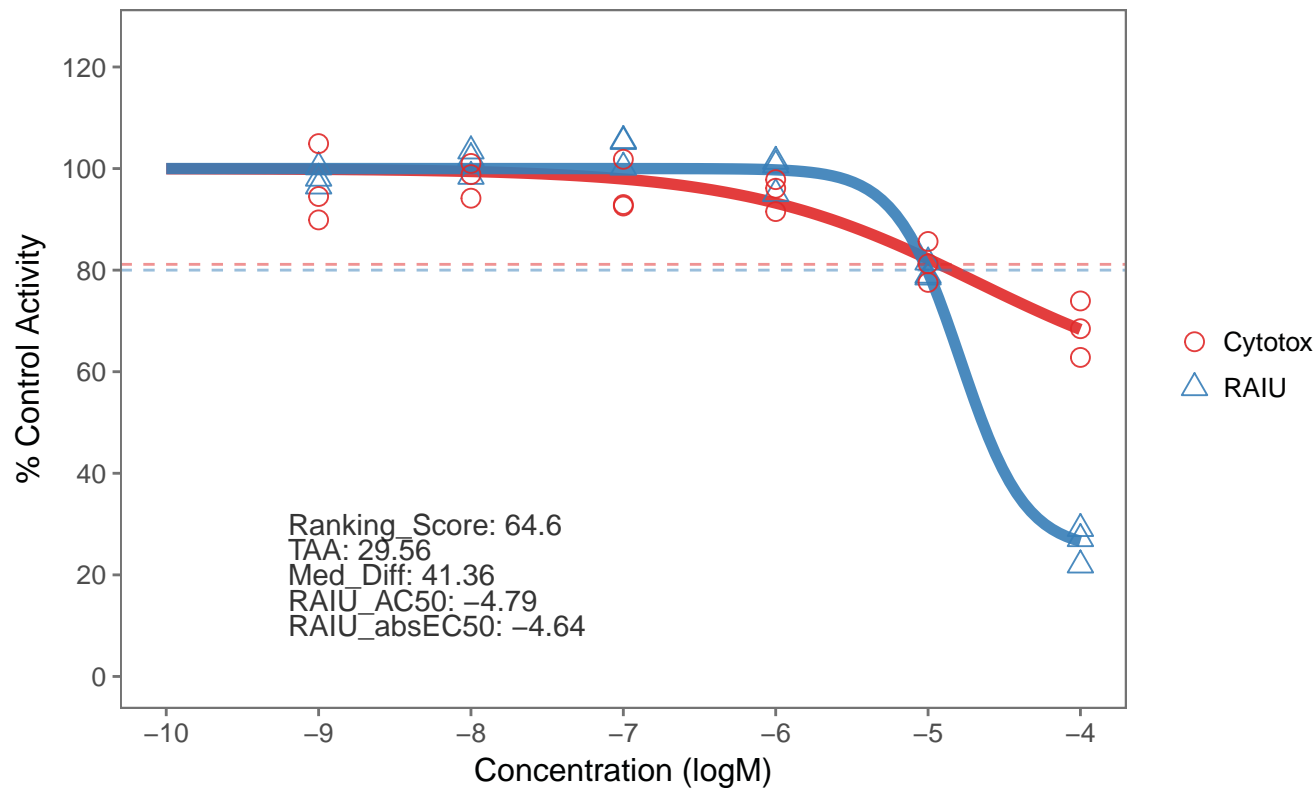



17. SPID: TP0001952G07  
NAME: Benzyl-C8-18-alkyldimethylammonium chlorides  
CAS NO: 63449-41-2

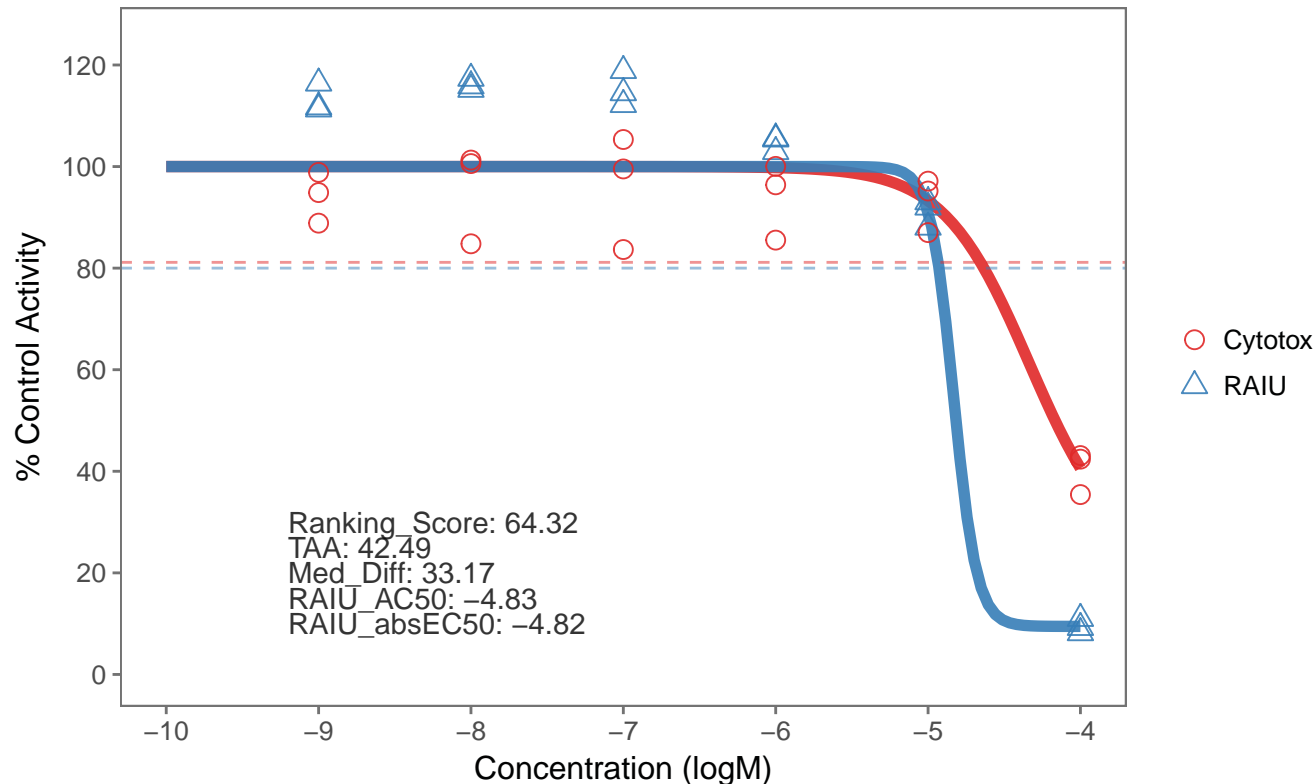

18. SPID: TP0001959D02  
NAME: Tris(2,3-dibromopropyl) phosphate  
CAS NO: 126-72-7

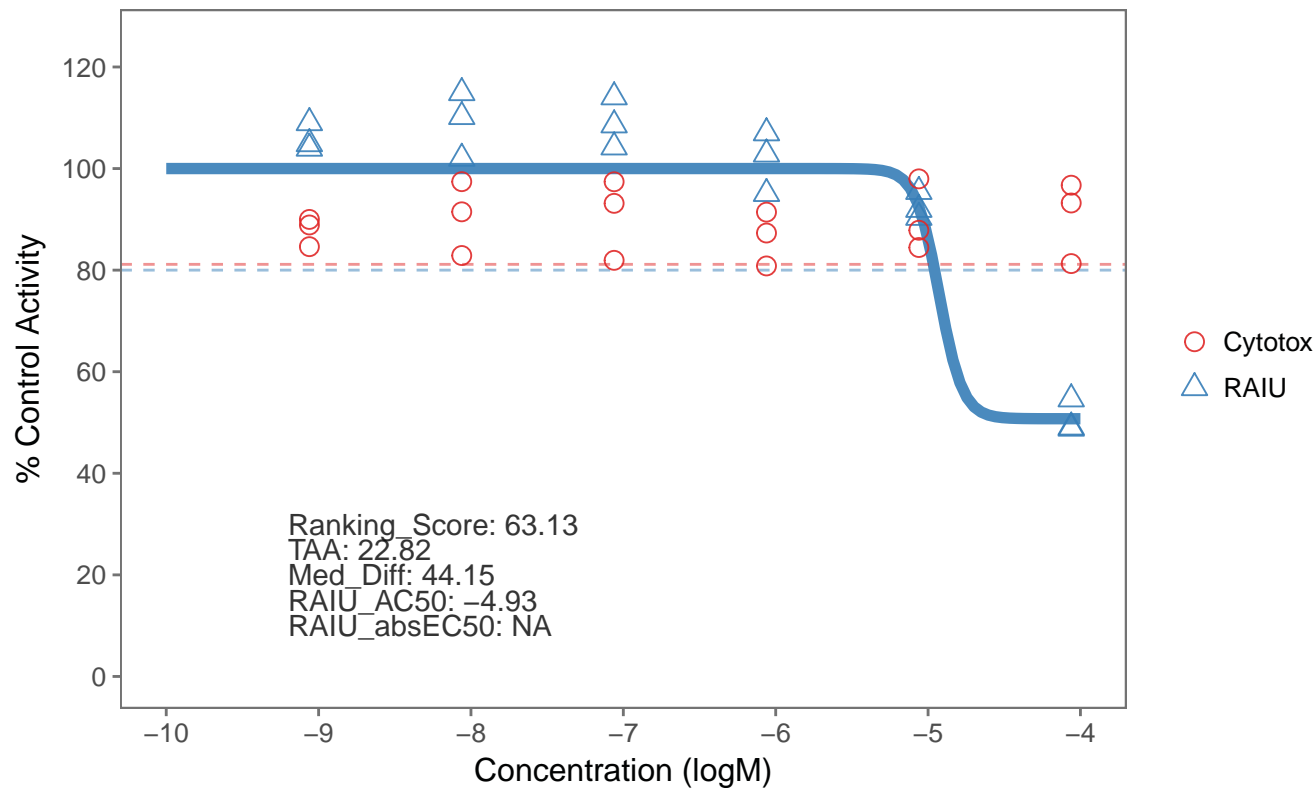

19. SPID: TP0001952B09  
NAME: Benzyl salicylate  
CAS NO: 118-58-1

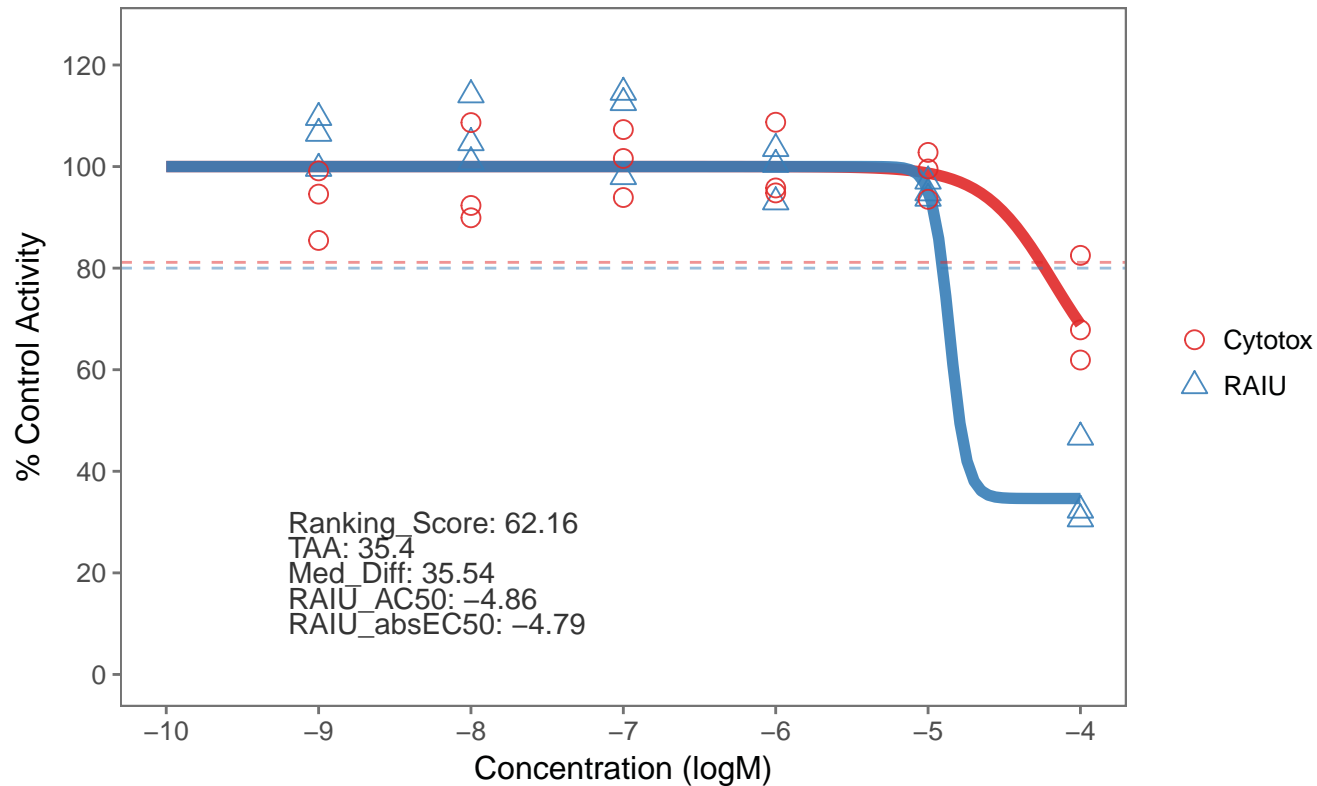

20. SPID: TP0001960G01  
NAME: Endosulfan sulfate  
CAS NO: 1031-07-8

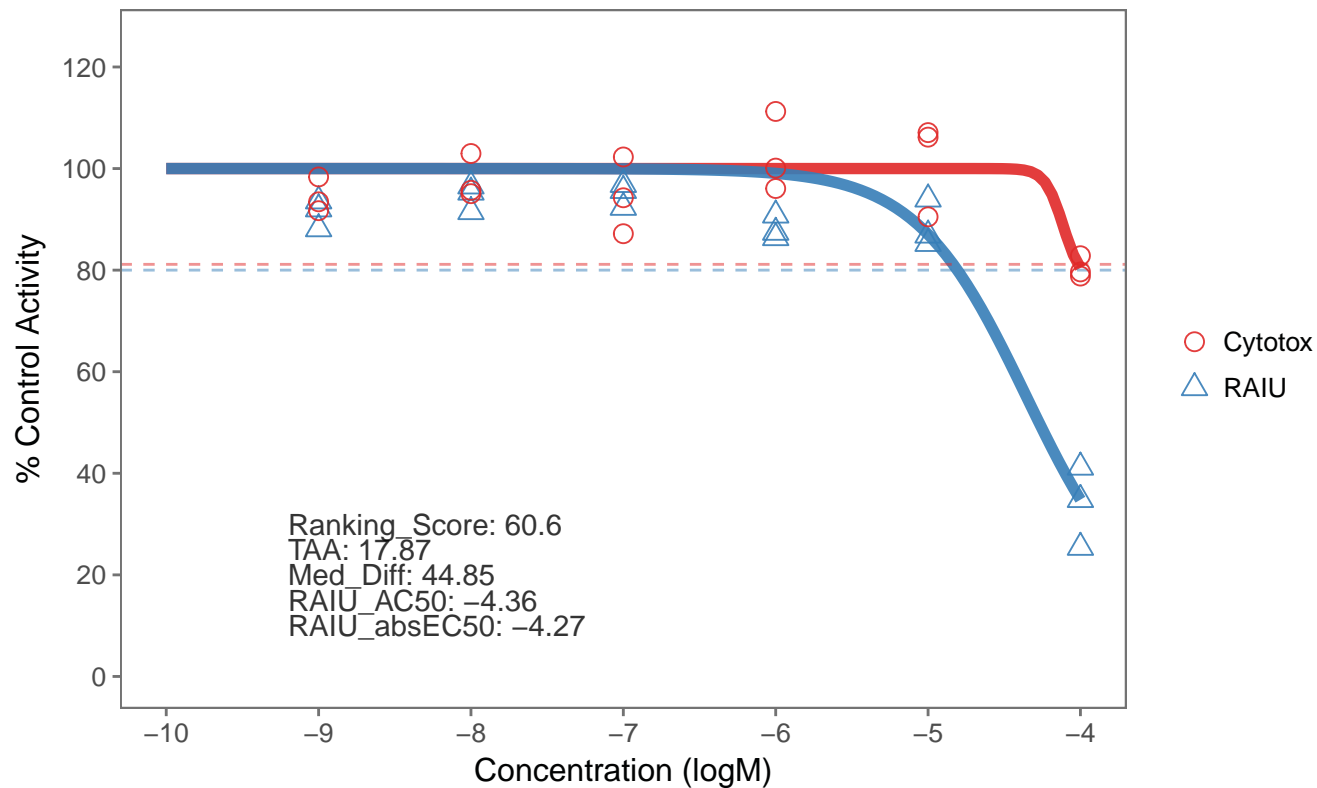

21. SPID: TP0001963G04

NAME: Riboflavin

CAS NO: 83-88-5

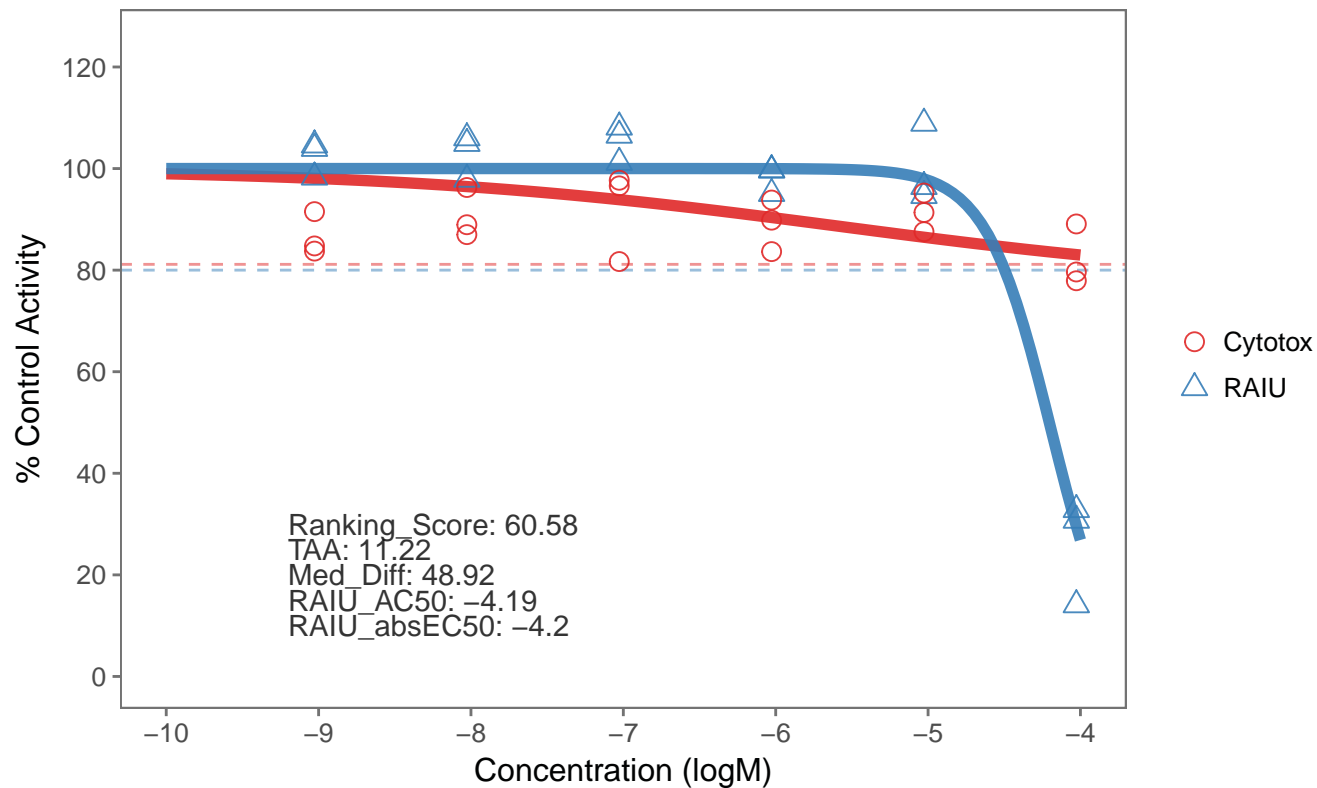

22. SPID: TP0001957B03

NAME: Zinc pyrithione

CAS NO: 13463-41-7

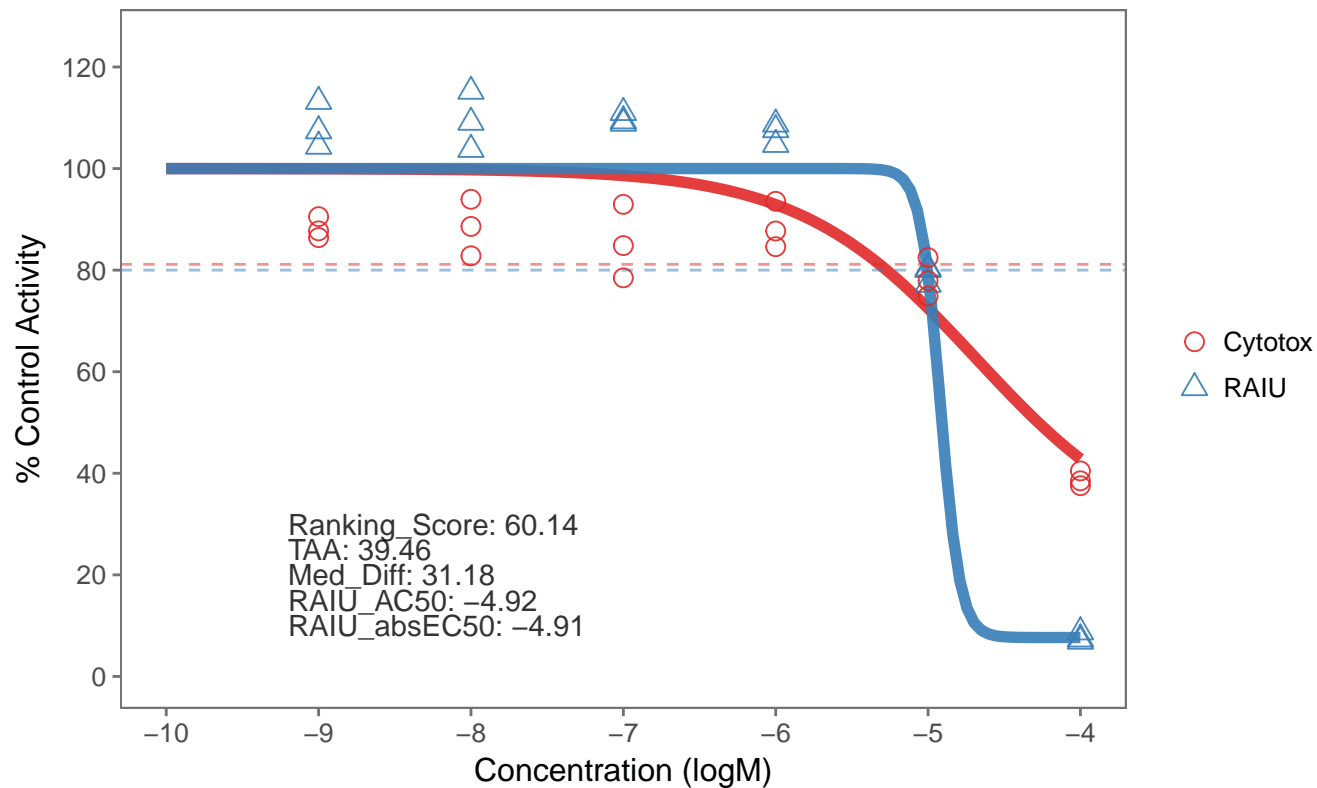

23. SPID: TP0001952F01  
NAME: Tributyltin benzoate  
CAS NO: 4342-36-3

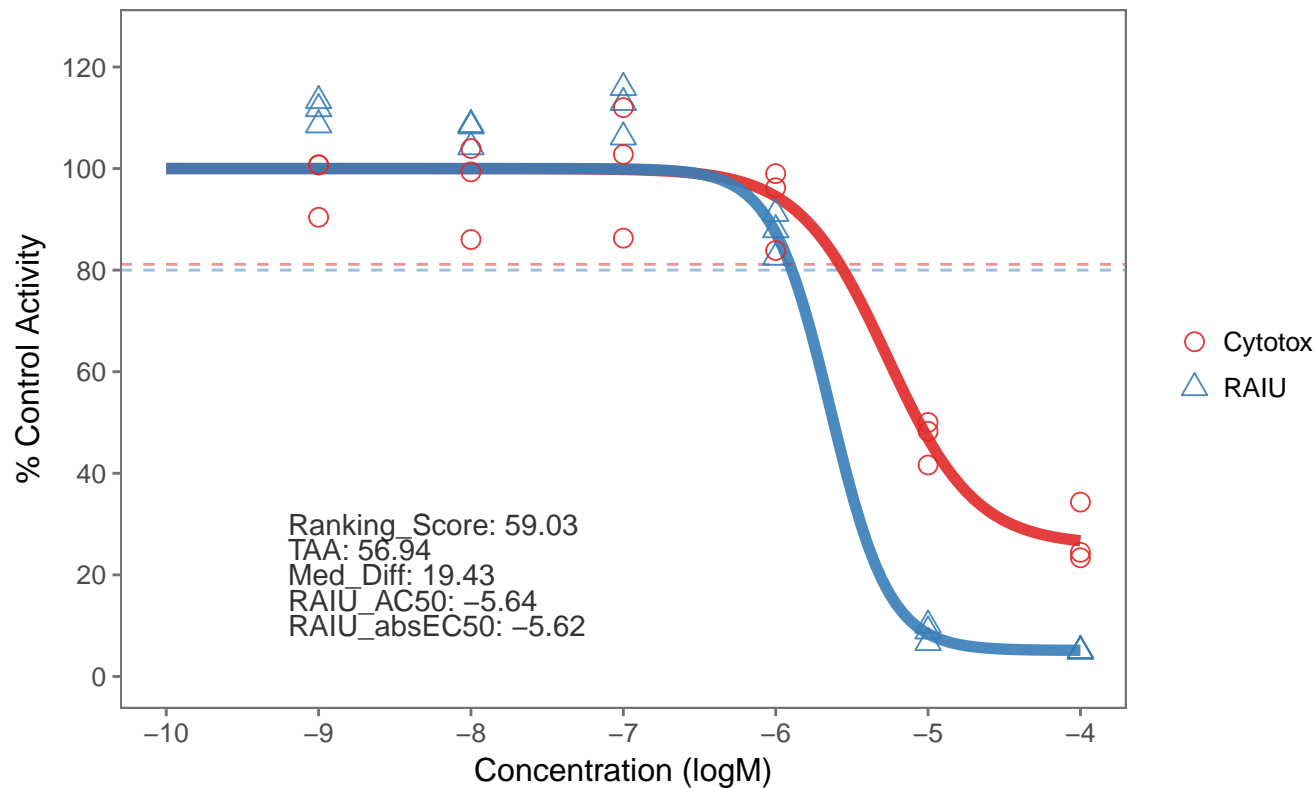

24. SPID: TP0001952E02  
NAME: Methylbenzethonium chloride  
CAS NO: 25155-18-4

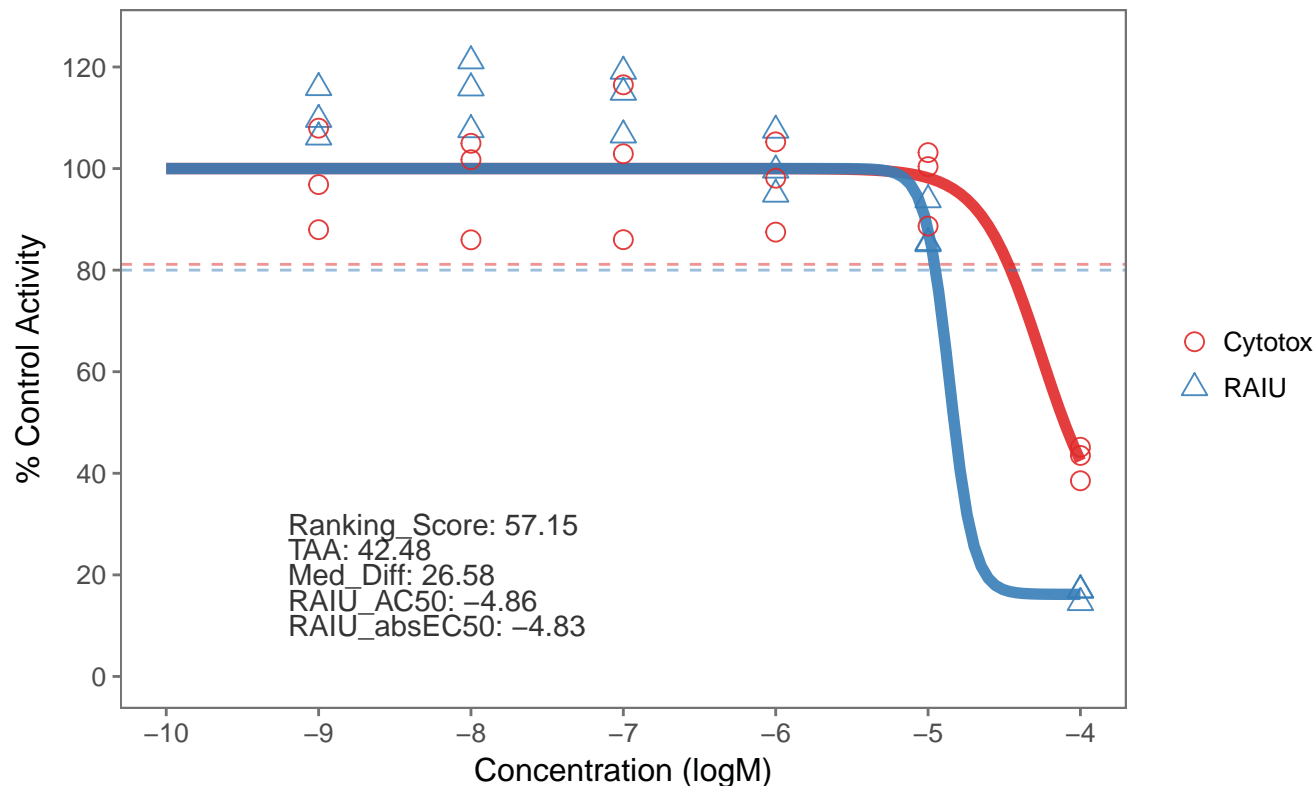



25. SPID: TP0001957C04  
NAME: Dibenzothiophene  
CAS NO: 132-65-0

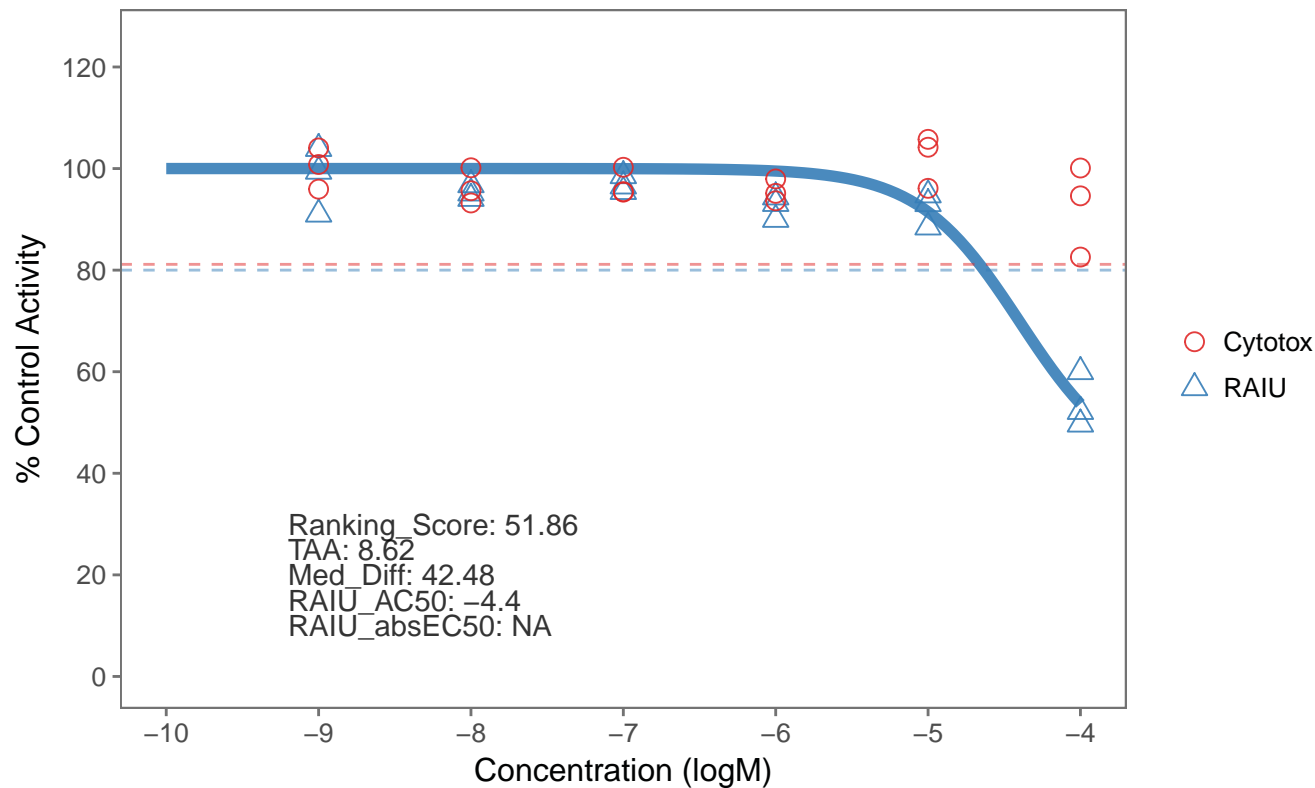

26. SPID: TP0001964D09

Myristyltrimethylammonium chlorideN,N,N-Trimethyltetradecan-1-aminium chloride

CAS NO: 4574-04-3

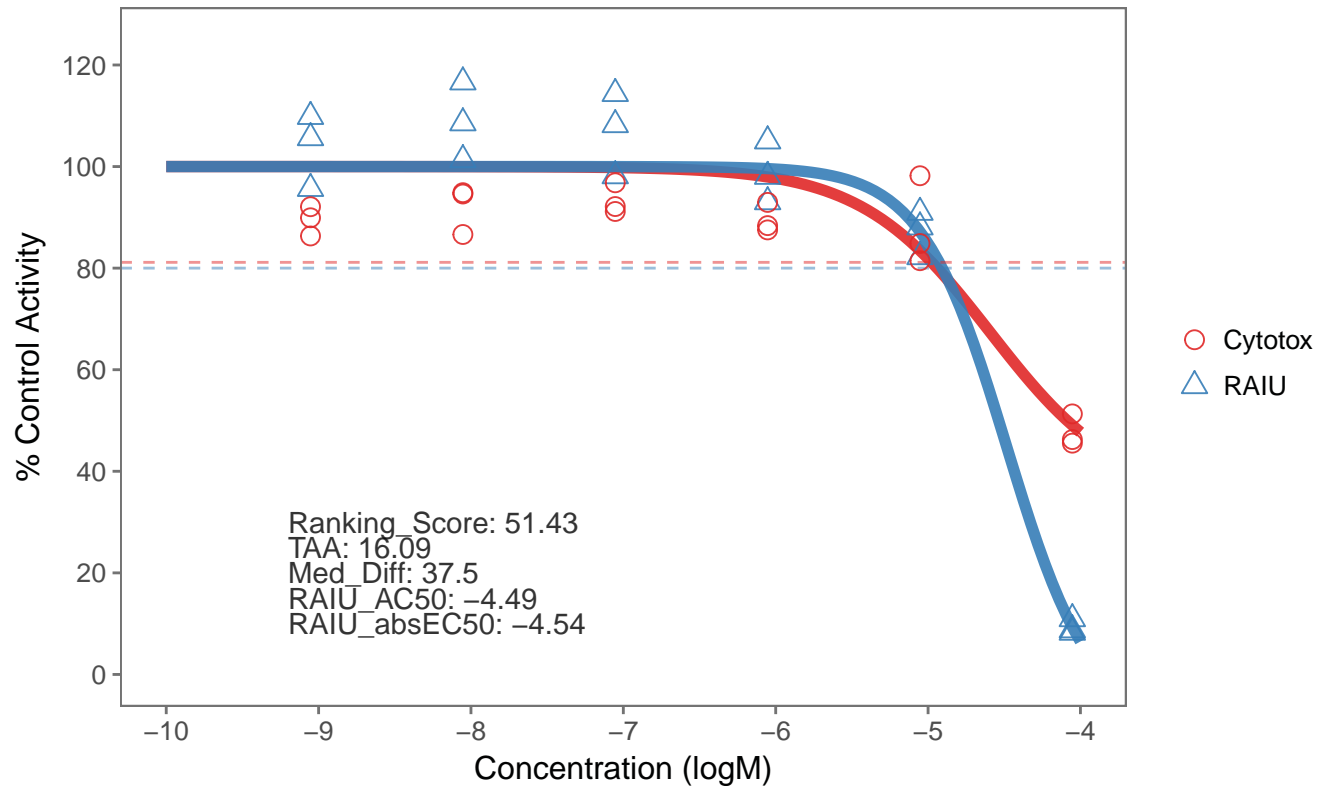

27. SPID: TP0001963D05  
NAME: Rhodamine 6G  
CAS NO: 989-38-8

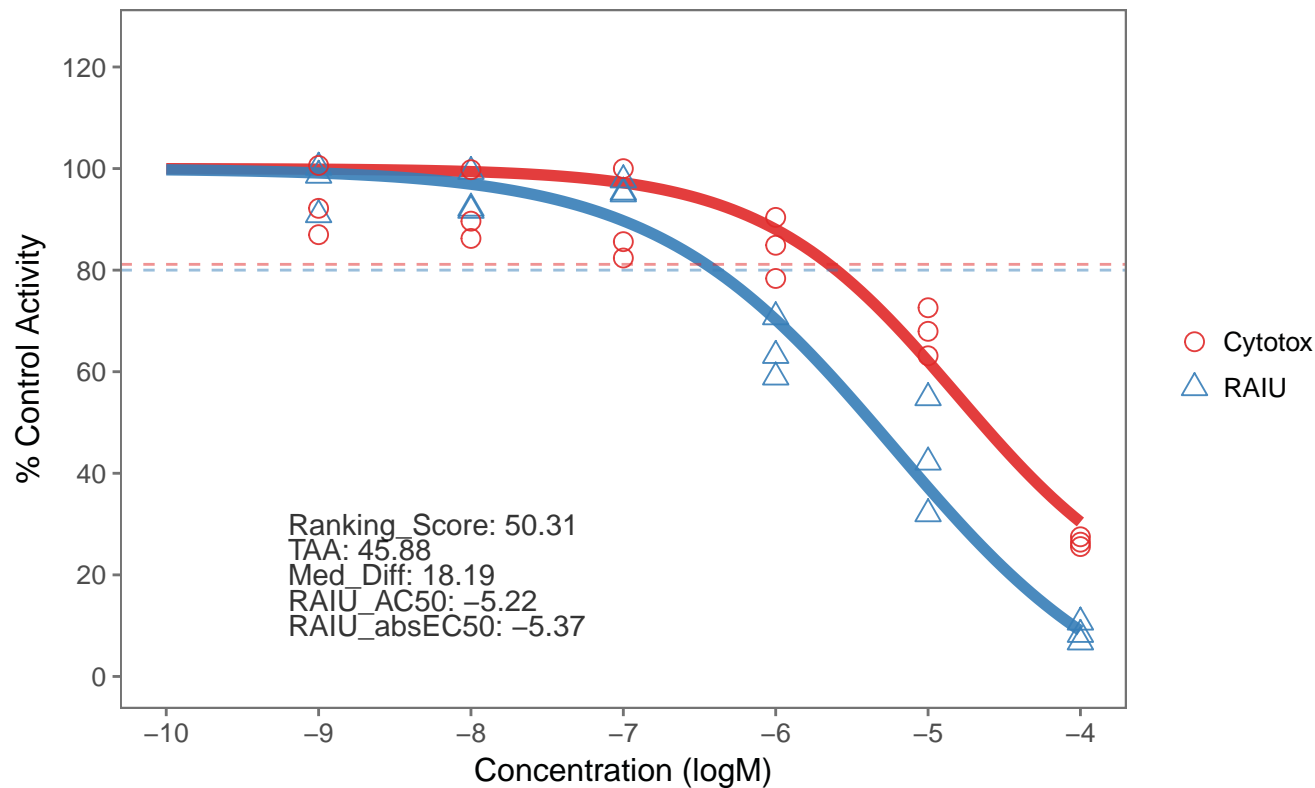

28. SPID: TP0001961E02  
NAME: Auramine hydrochloride  
CAS NO: 2465-27-2

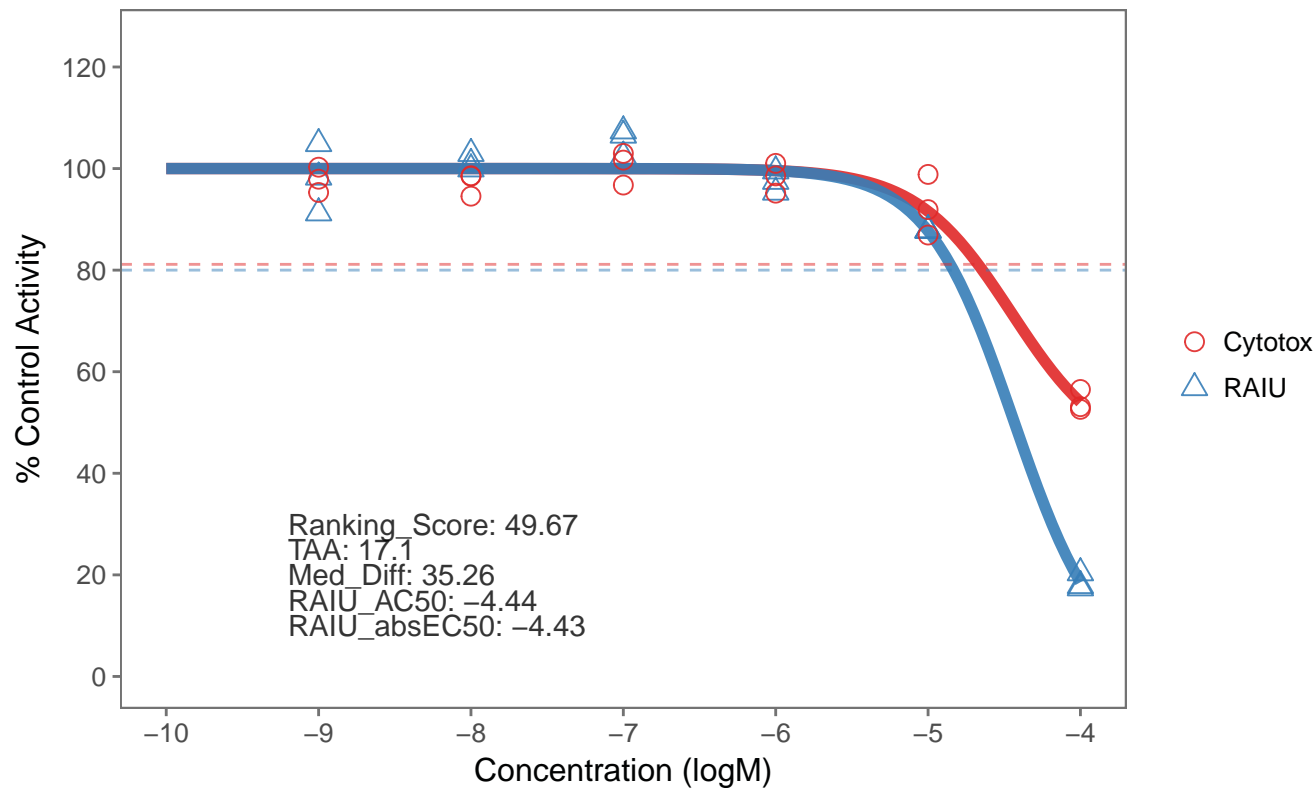

29. SPID: TP0001962G05  
NAME: Sulfuric acid, monononyl ester, sodium salt  
CAS NO: 1072-15-7

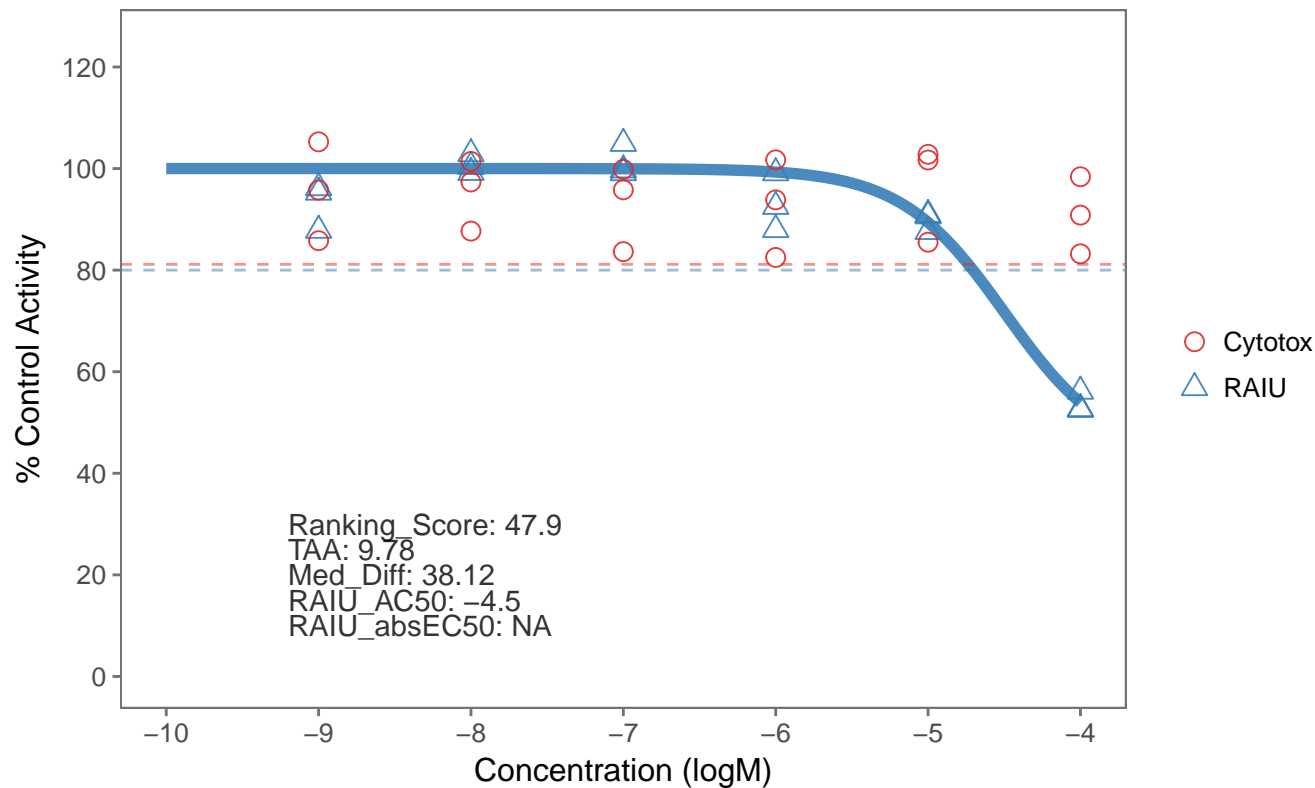

30. SPID: TP0001959B03

NAME: Chrysin

CAS NO: 480-40-0

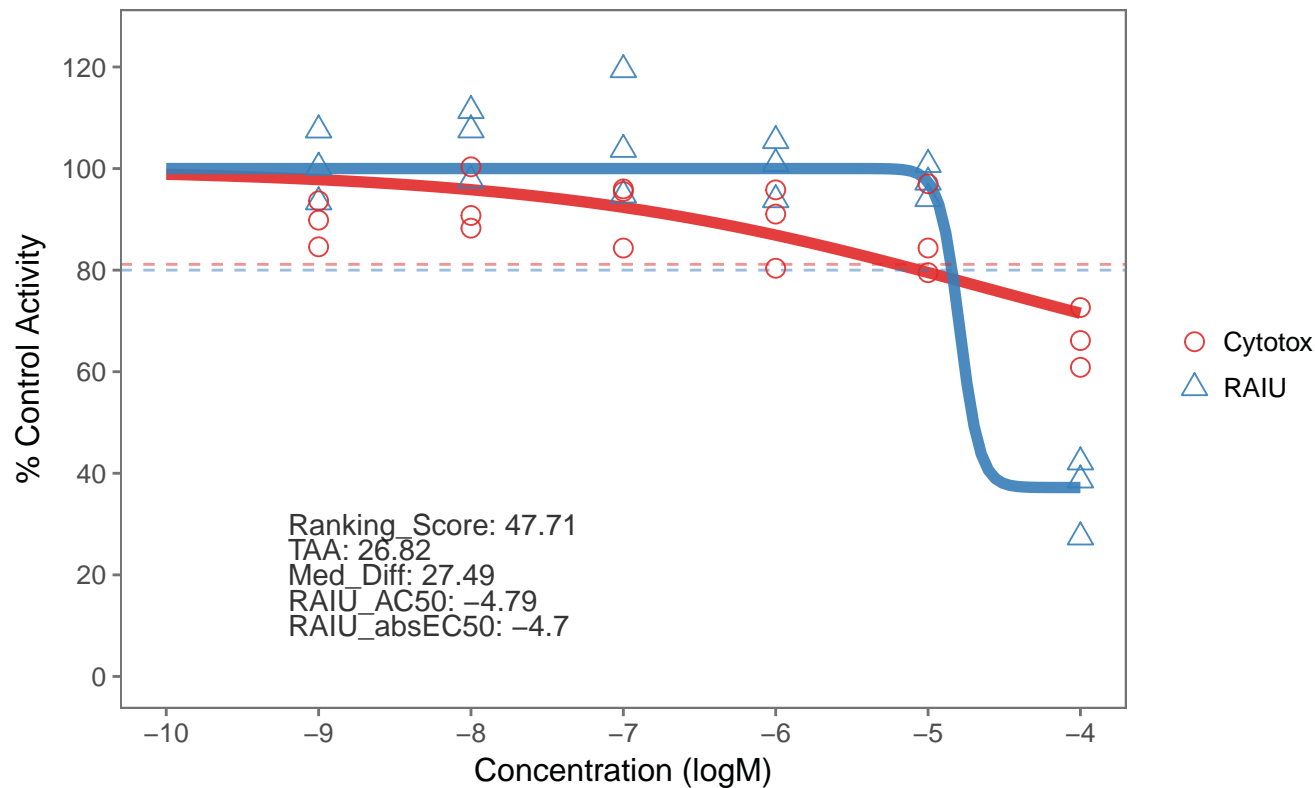

31. SPID: TP0001959D03  
NAME: 2,6-Di-tert-butyl-4-methoxyphenol  
CAS NO: 489-01-0

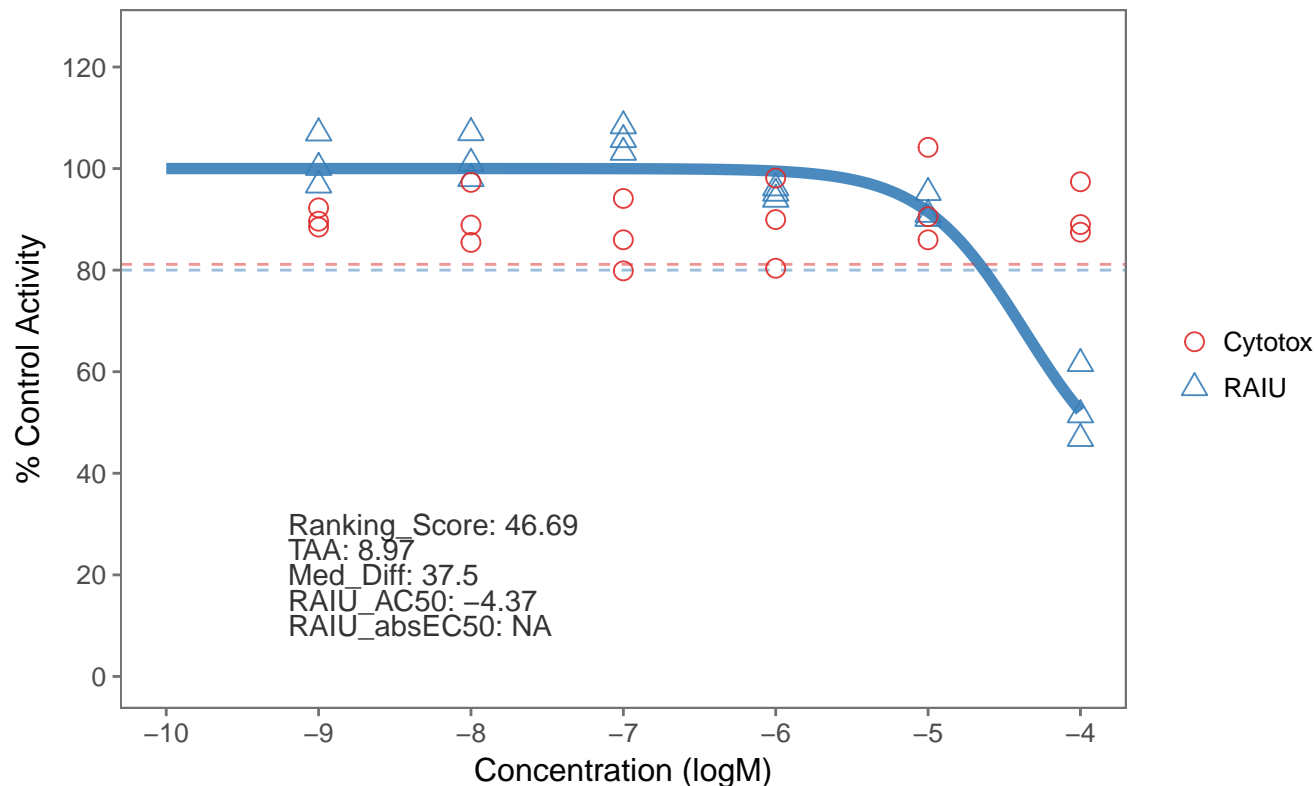

32. SPID: TP0001963C05  
NAME: Endosulfan I  
CAS NO: 959-98-8

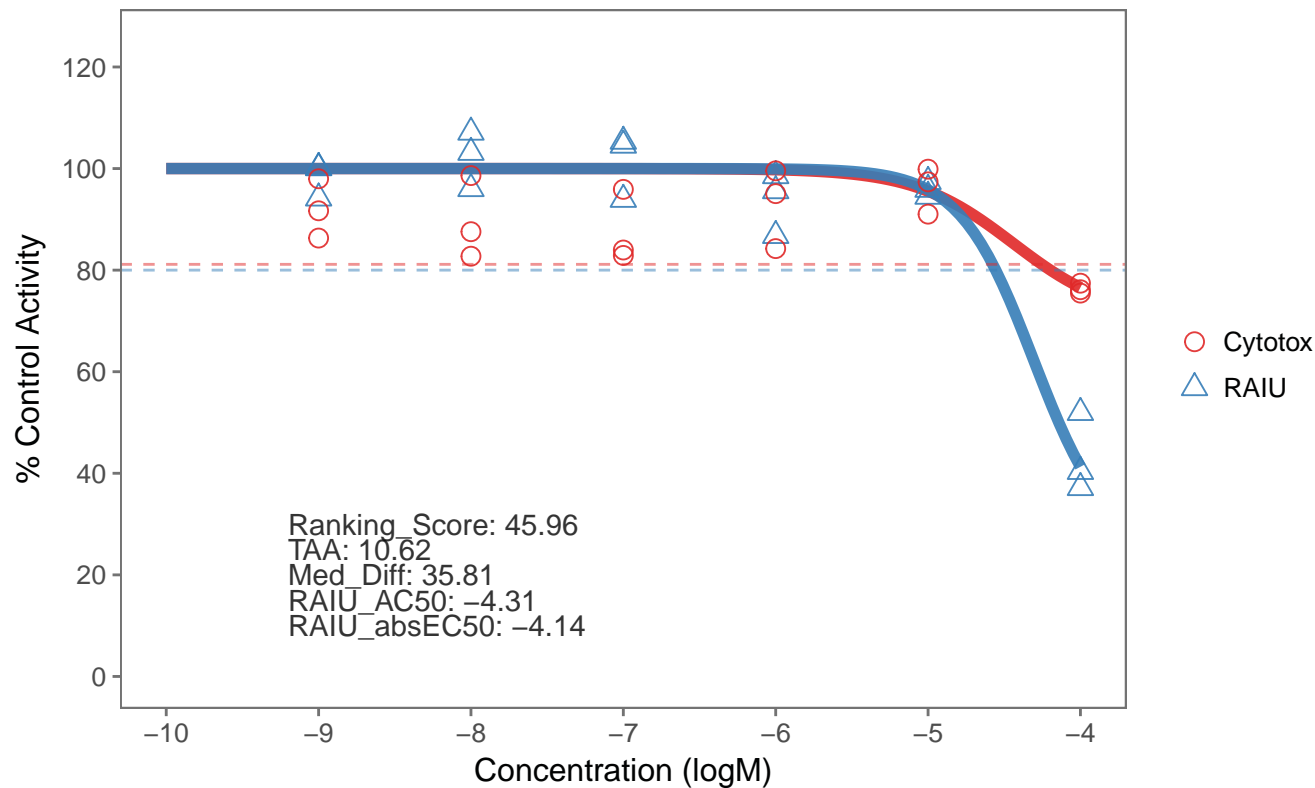



33. SPID: TP0001964C04

NAME: Phoxim

CAS NO: 14816-18-3

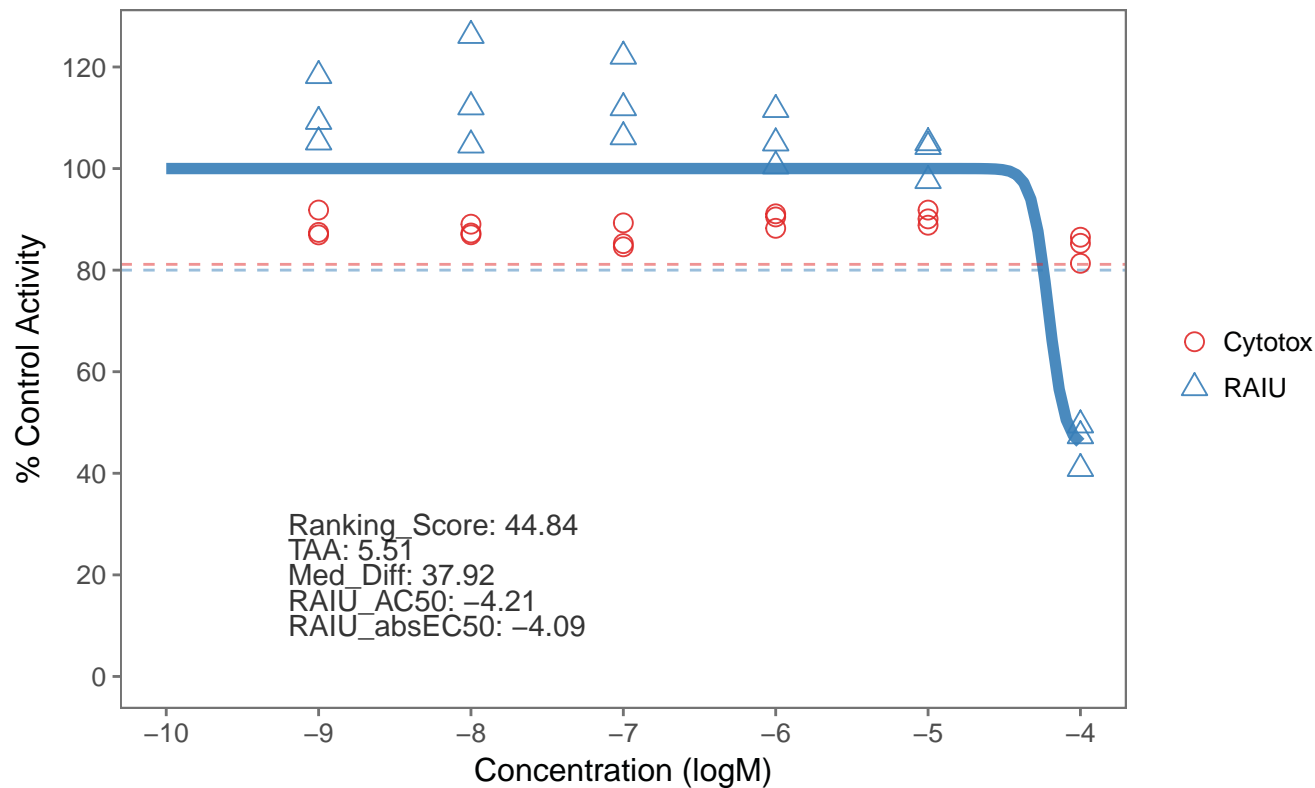

34. SPID: TP0001962B05  
NAME: Tetrabutyltin  
CAS NO: 1461-25-2

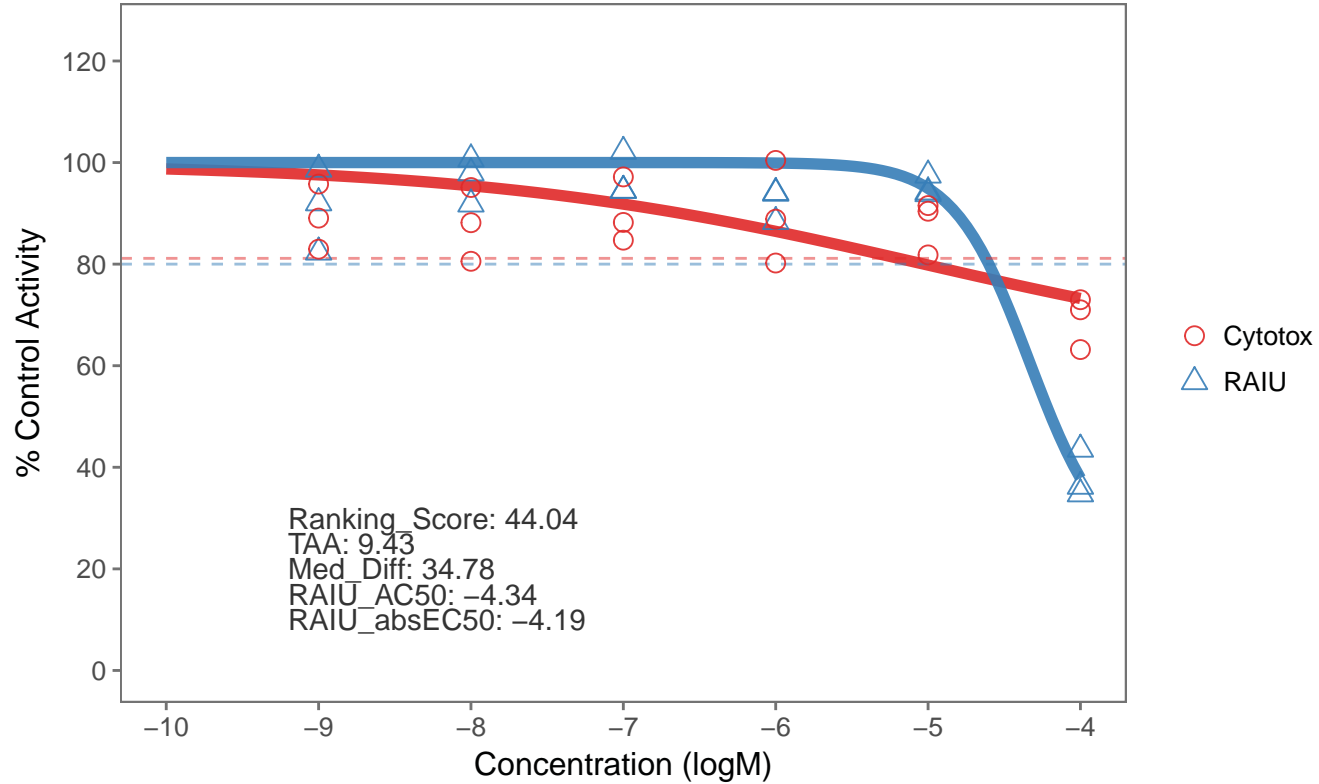

35. SPID: TP0001955D09  
NAME: Econazole nitrate  
CAS NO: 24169-02-6

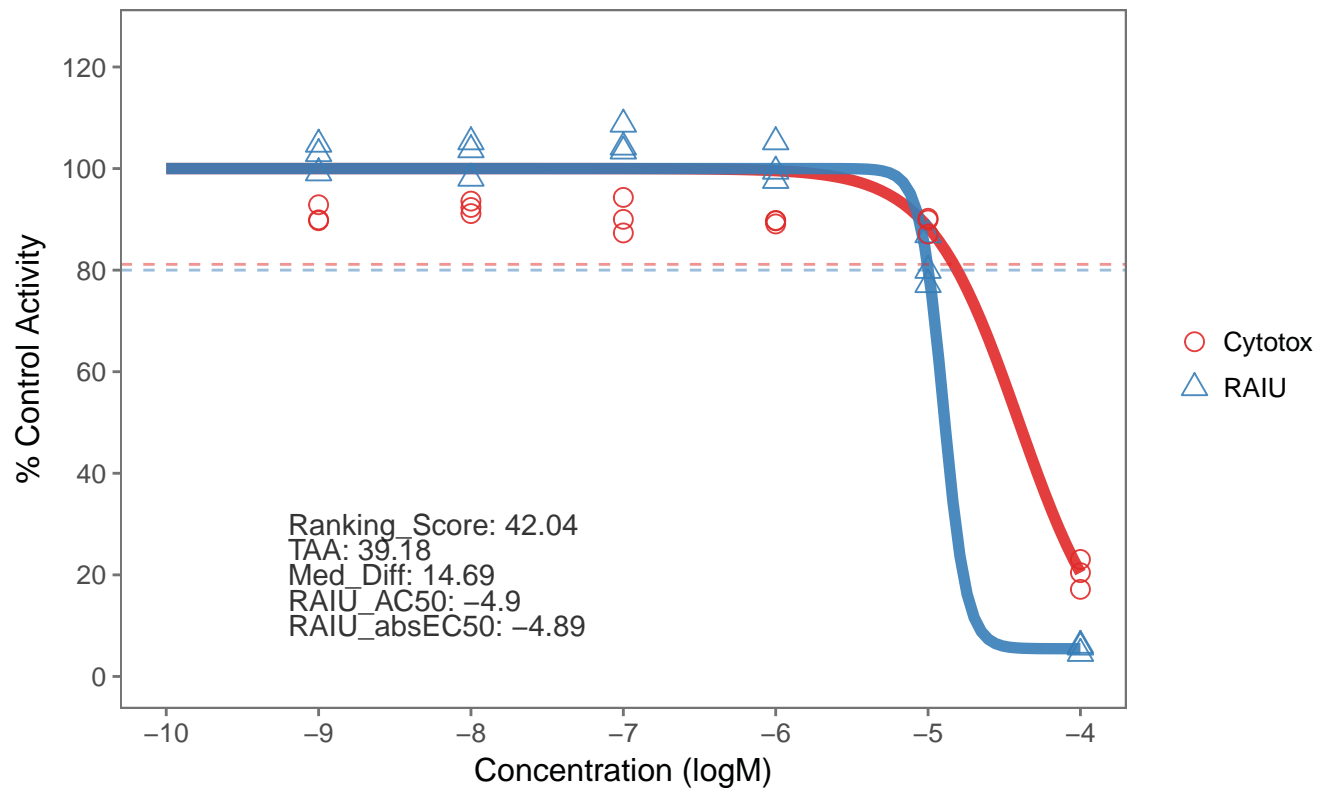

36. SPID: TP0001964G11  
NAME: 4,4'-Dichlorodiphenyl sulfone  
CAS NO: 80-07-9

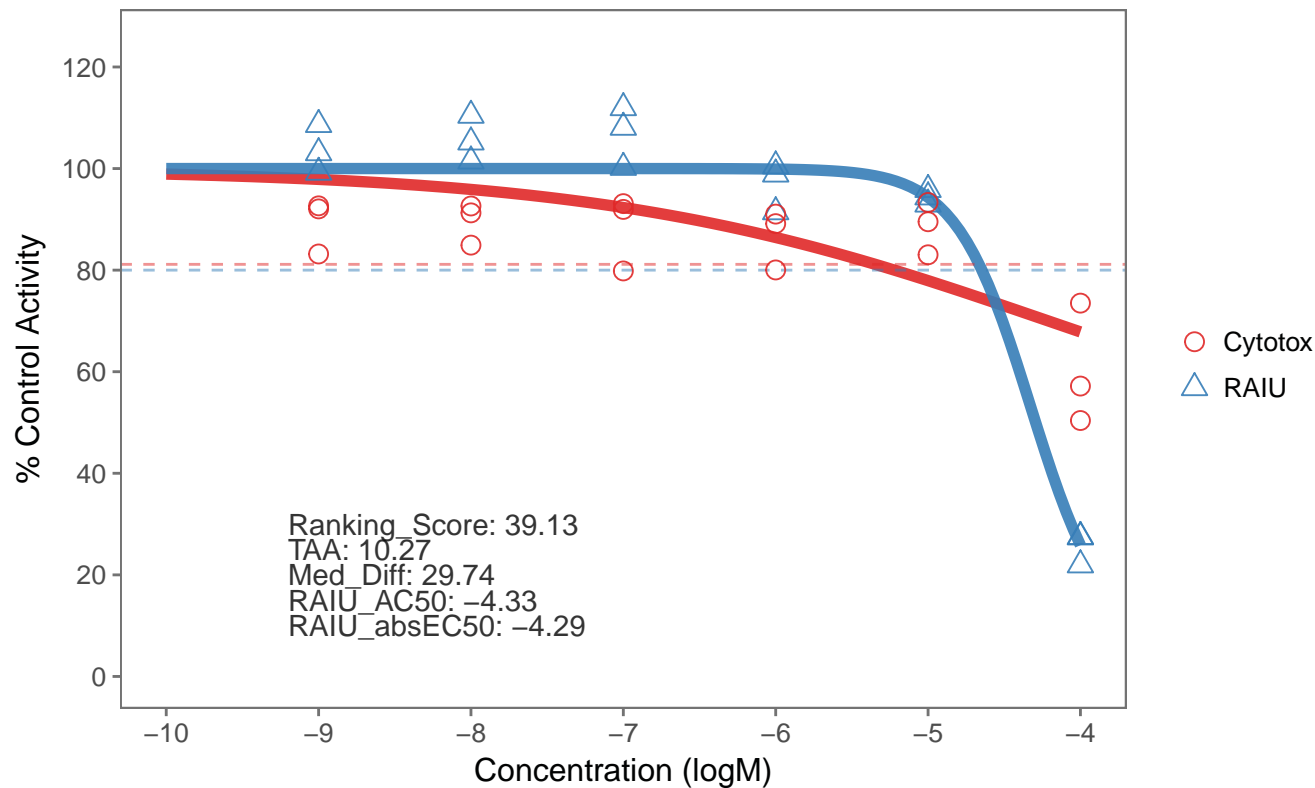

37. SPID: TP0001954D11

NAME: Triclosan

CAS NO: 3380-34-5

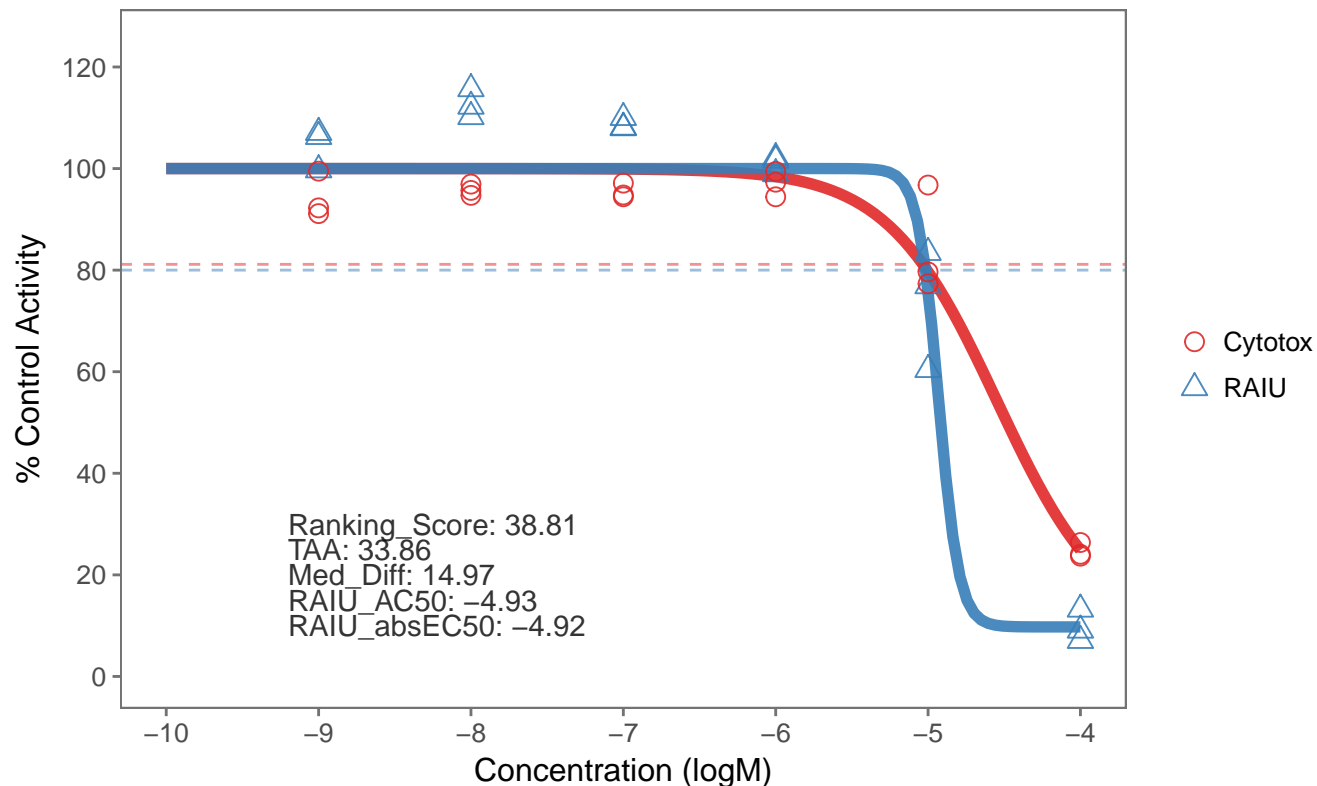

38. SPID: TP0001952C05  
NAME: 2,2'-Methylenebis(ethyl-6-tert-butylphenol)  
CAS NO: 88-24-4

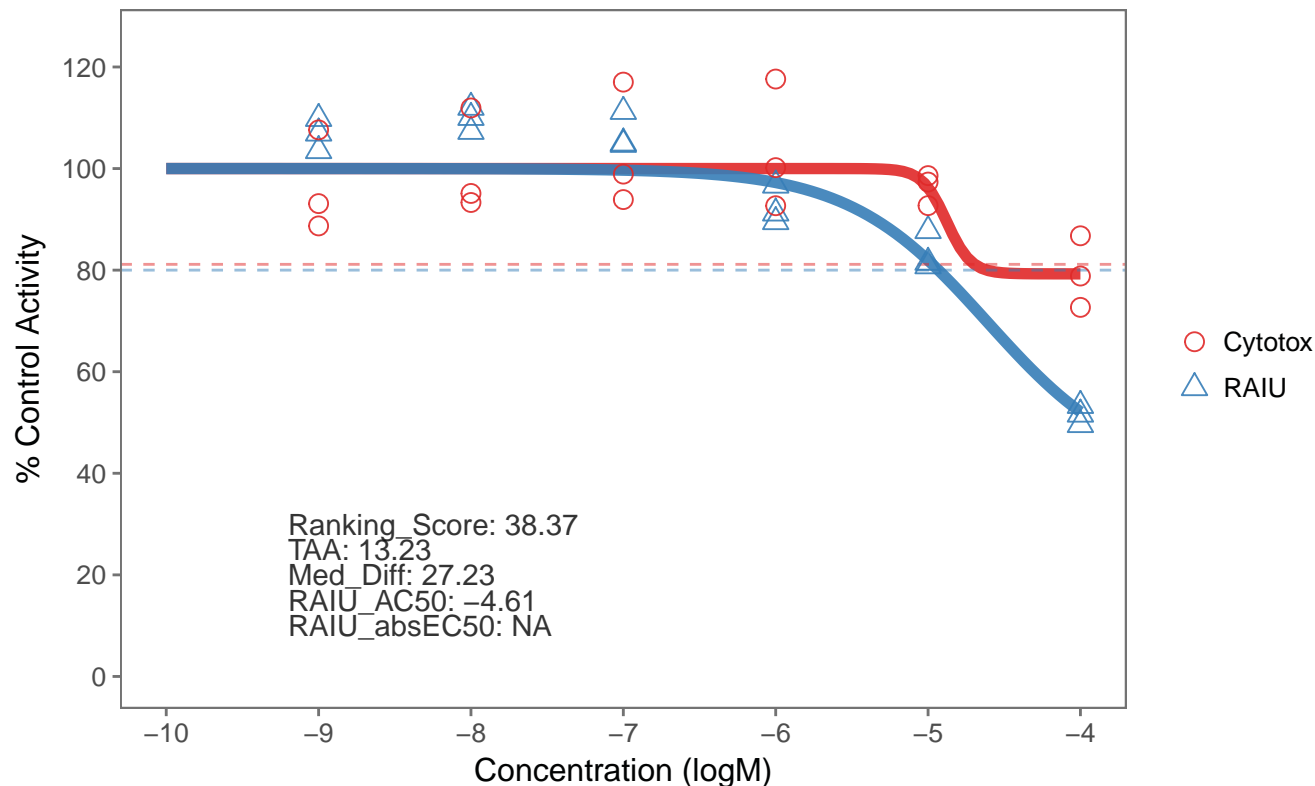

39. SPID: TP0001960B05  
NAME: Kresoxim-methyl  
CAS NO: 143390-89-0

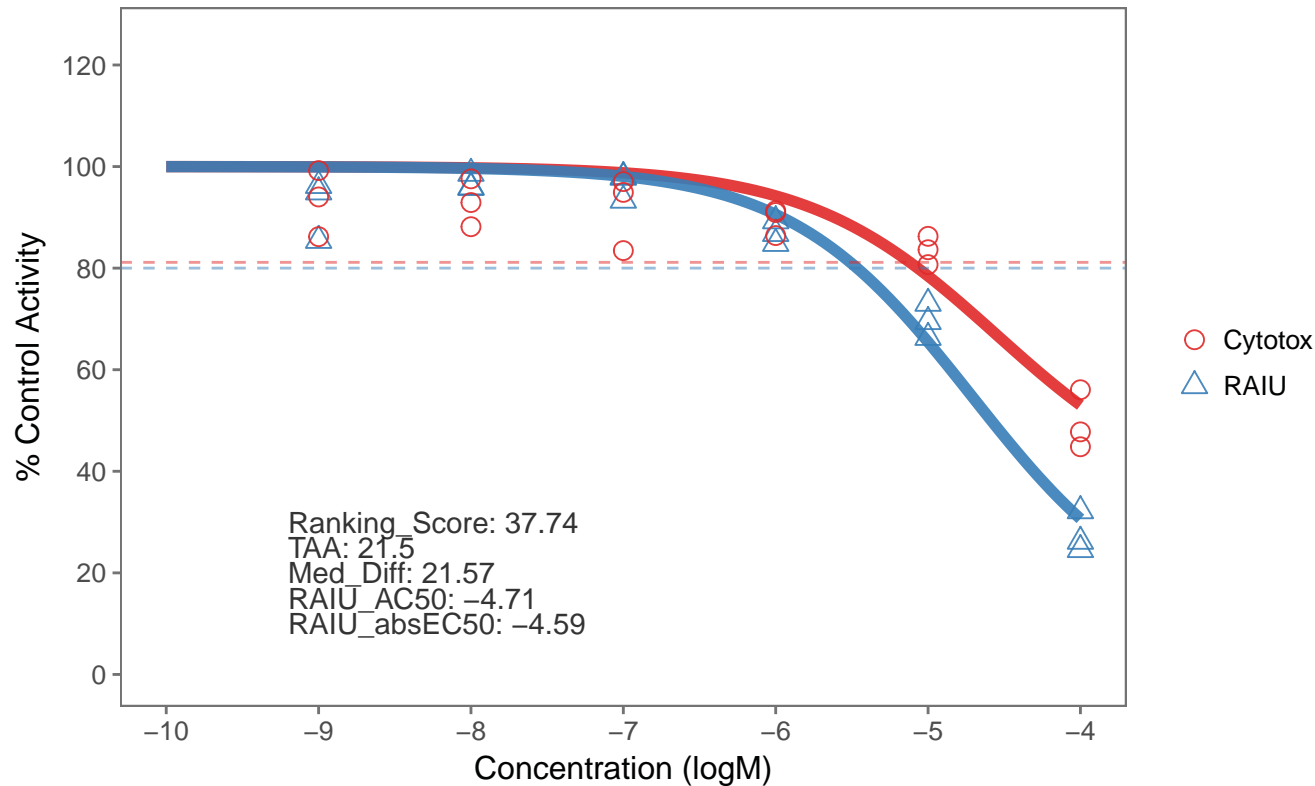

40. SPID: TP0001963E07

NAME: 4-Hexylaniline

CAS NO: 33228-45-4

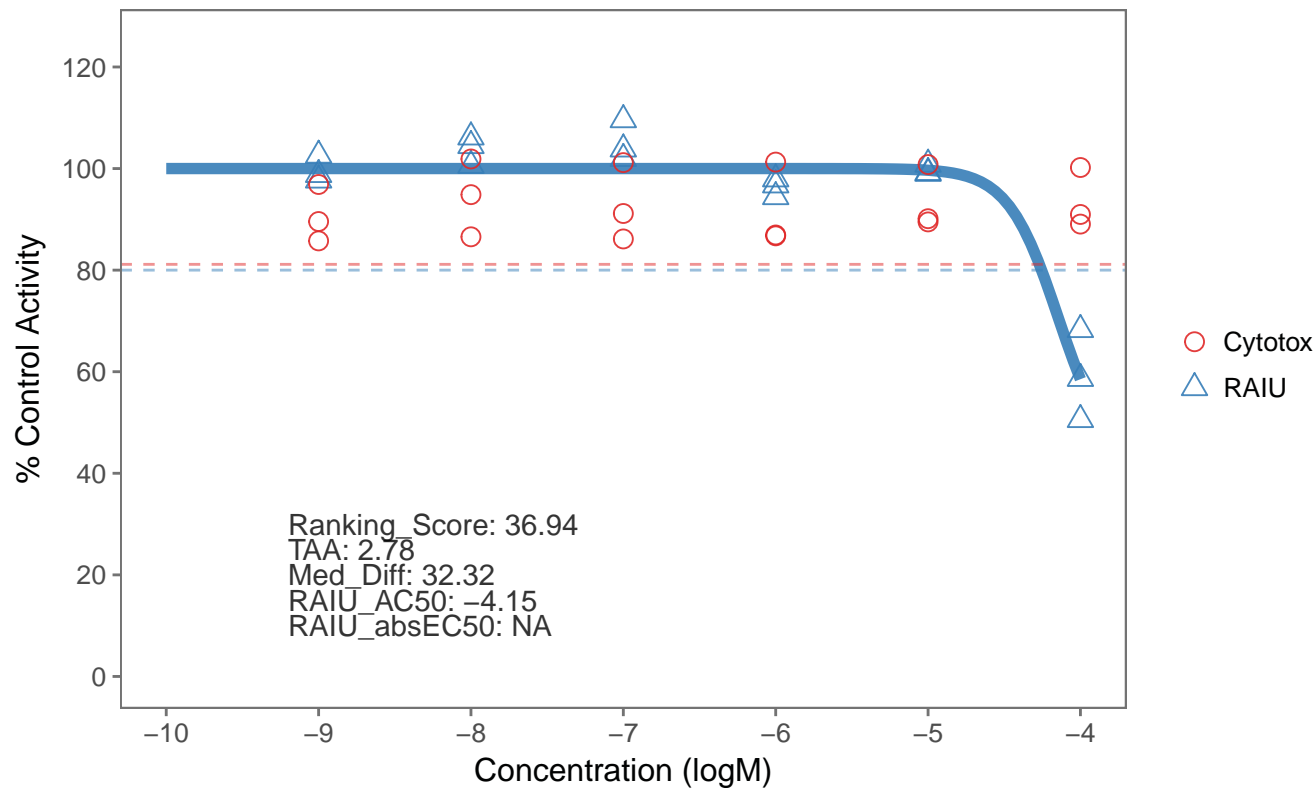



41. SPID: TP0001953G08  
NAME: Butylated hydroxytoluene  
CAS NO: 128-37-0

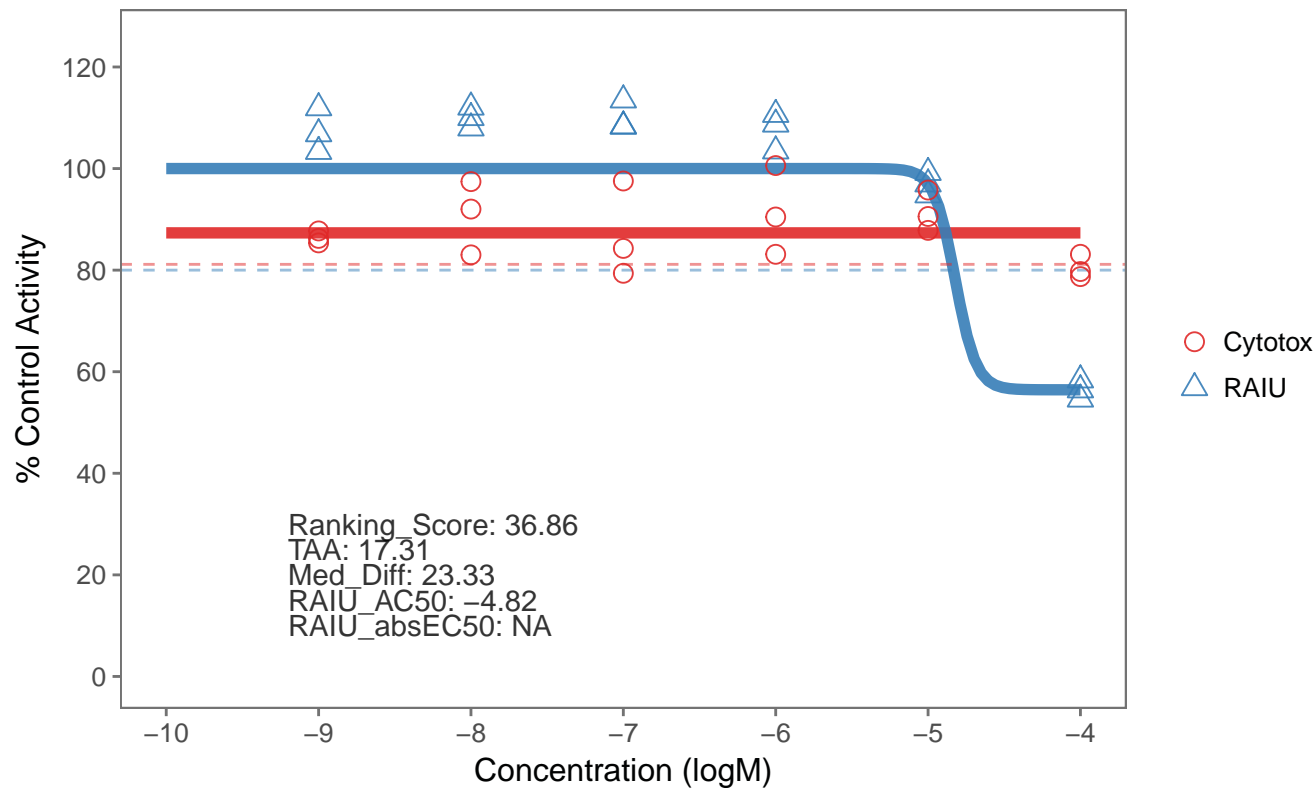

42. SPID: TP0001952C08

NAME: Basic Blue 7

CAS NO: 2390-60-5

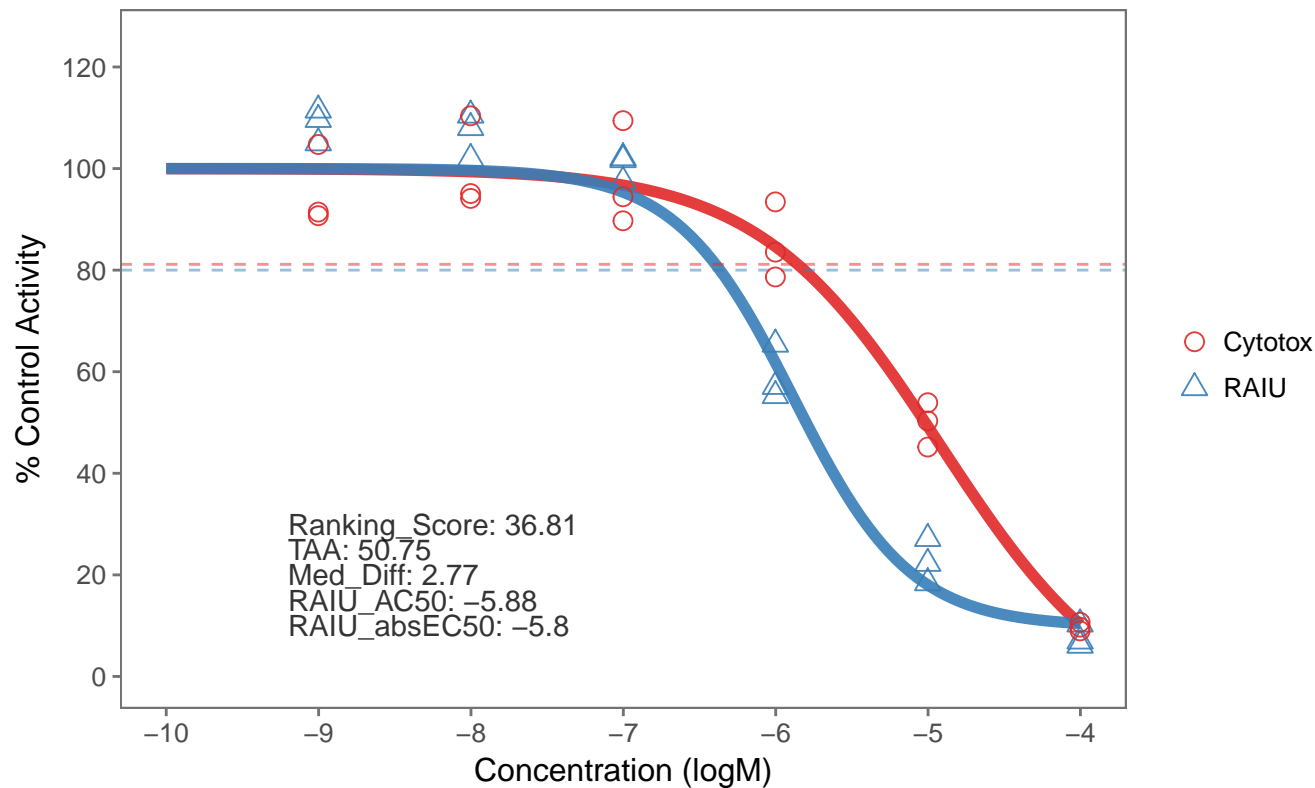

43. SPID: TP0001952D02  
NAME: Sodium lauryl polyoxyethylene ether sulfate  
CAS NO: 9004-82-4

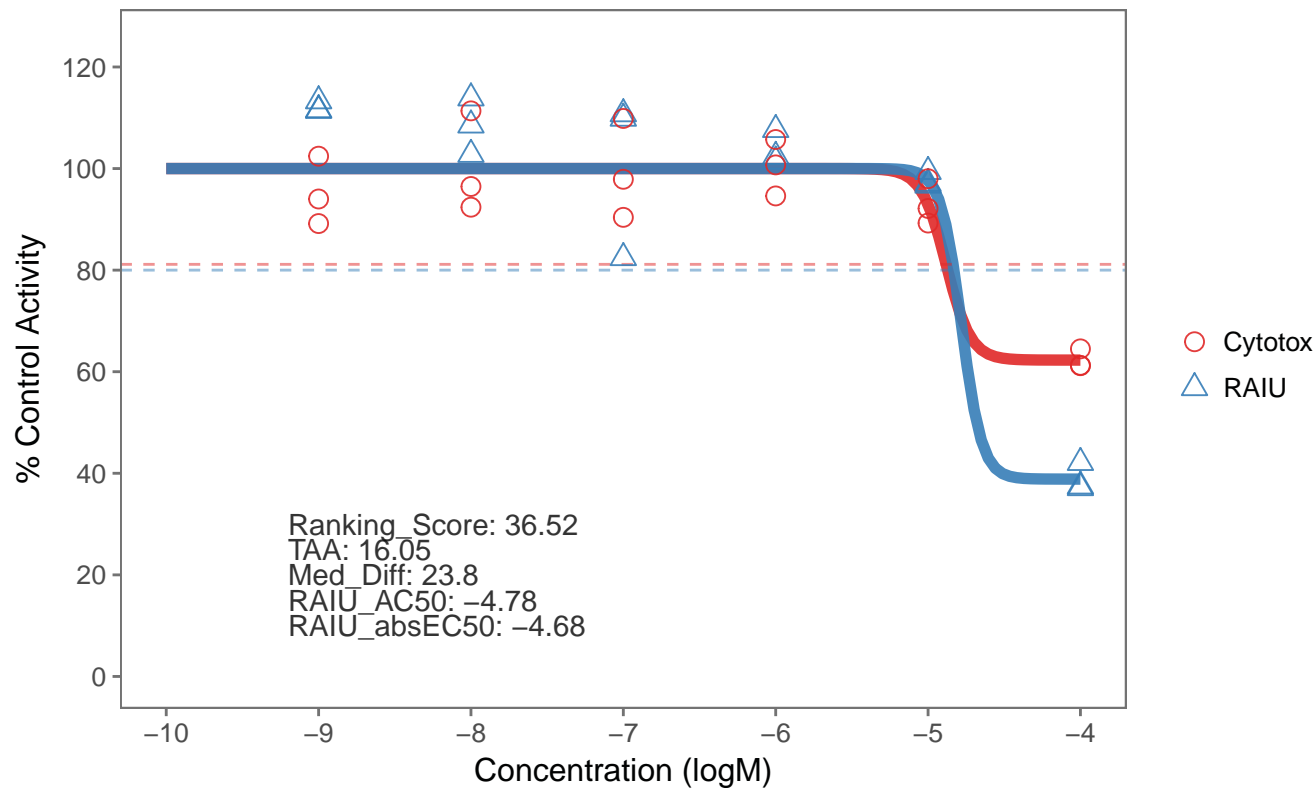

44. SPID: TP0001963E01  
NAME: Potassium chlorate  
CAS NO: 3811-04-9

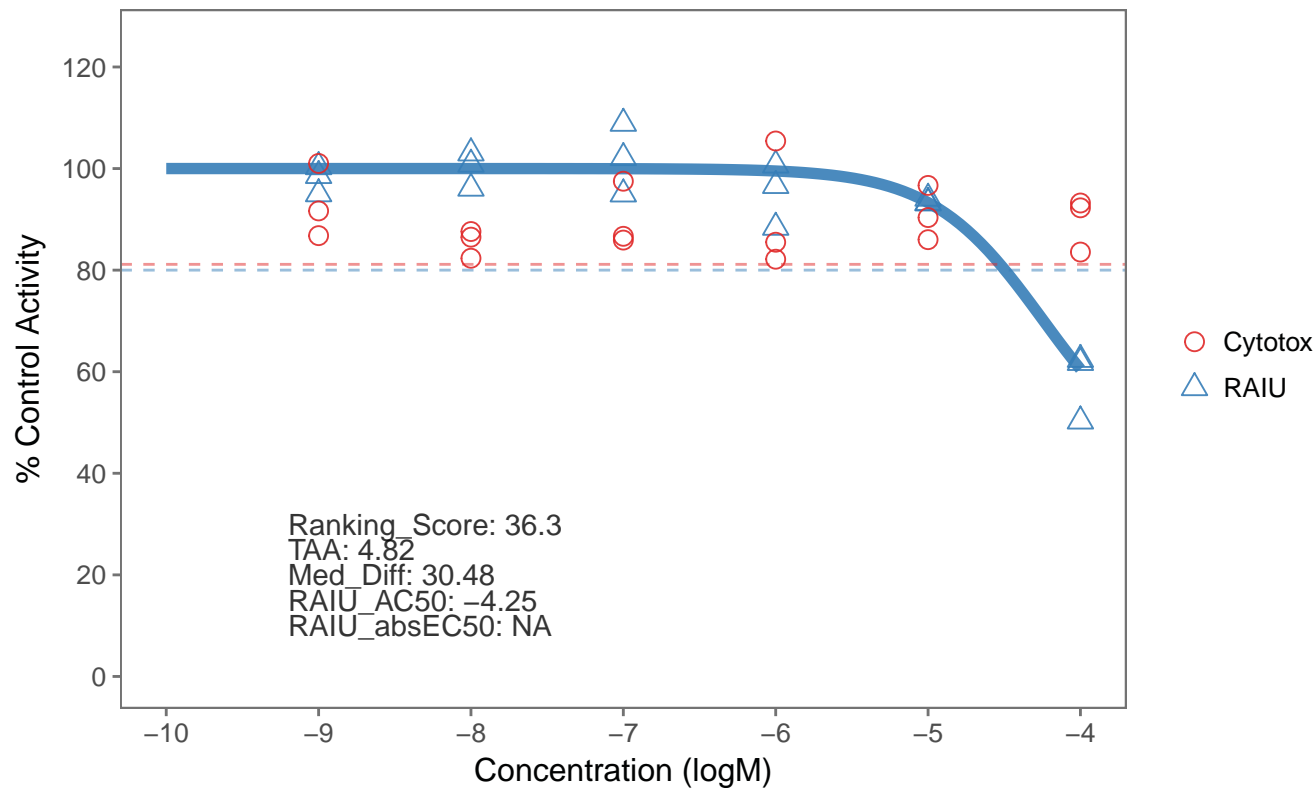

45. SPID: TP0001963E03  
NAME: 4,4'-Methylenebis(2,6-diethylaniline)  
CAS NO: 13680-35-8

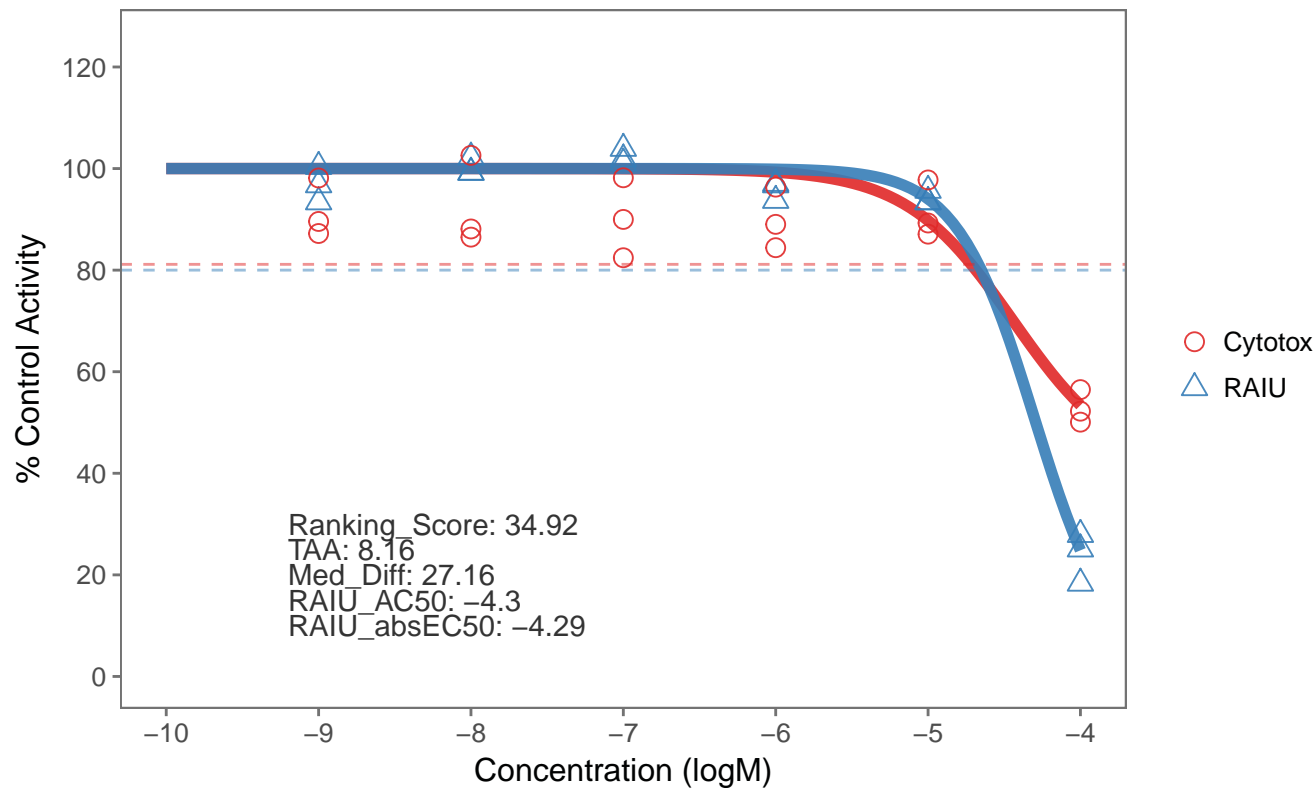

46. SPID: TP0001964B09  
NAME: Dodecyl sulfate triethanolamine salt  
CAS NO: 139-96-8

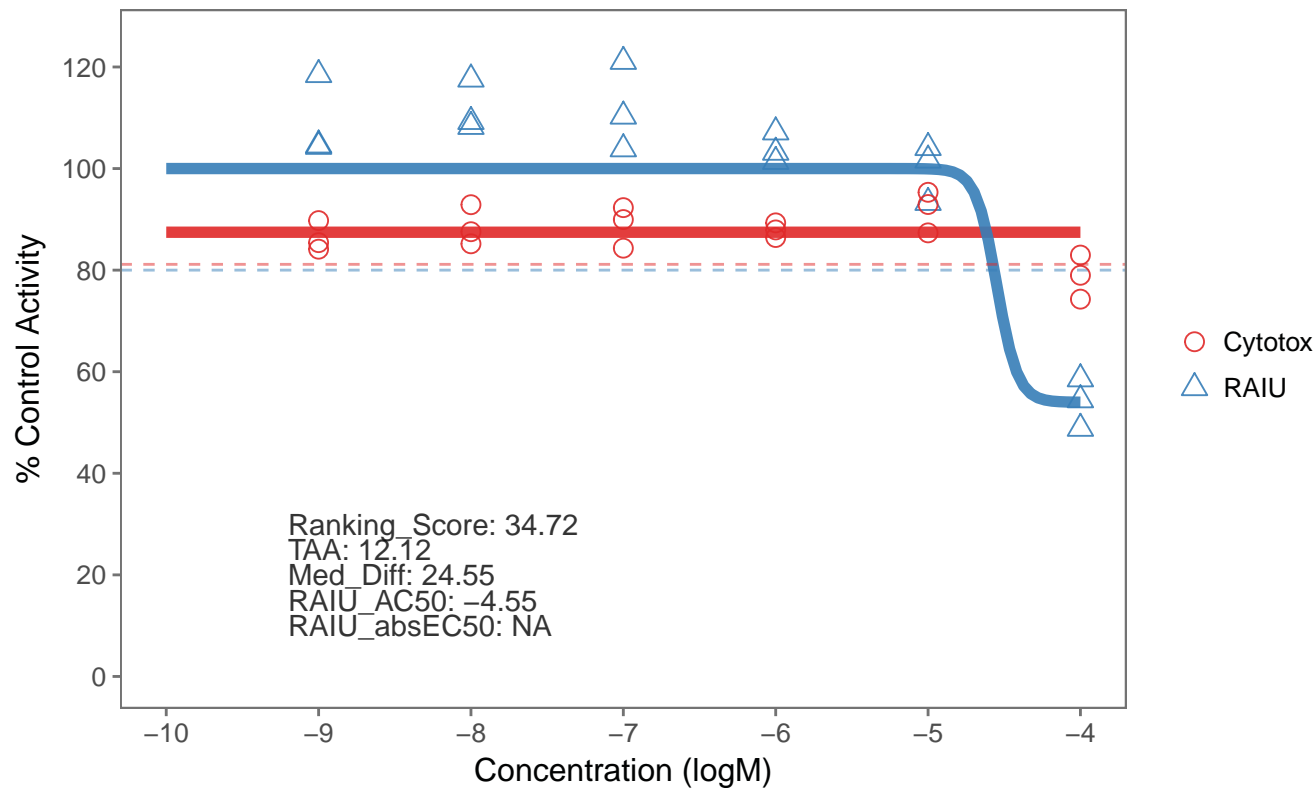

47. SPID: TP0001955B10  
NAME: 3-Trifluoromethyl-4-nitrophenol  
CAS NO: 88-30-2

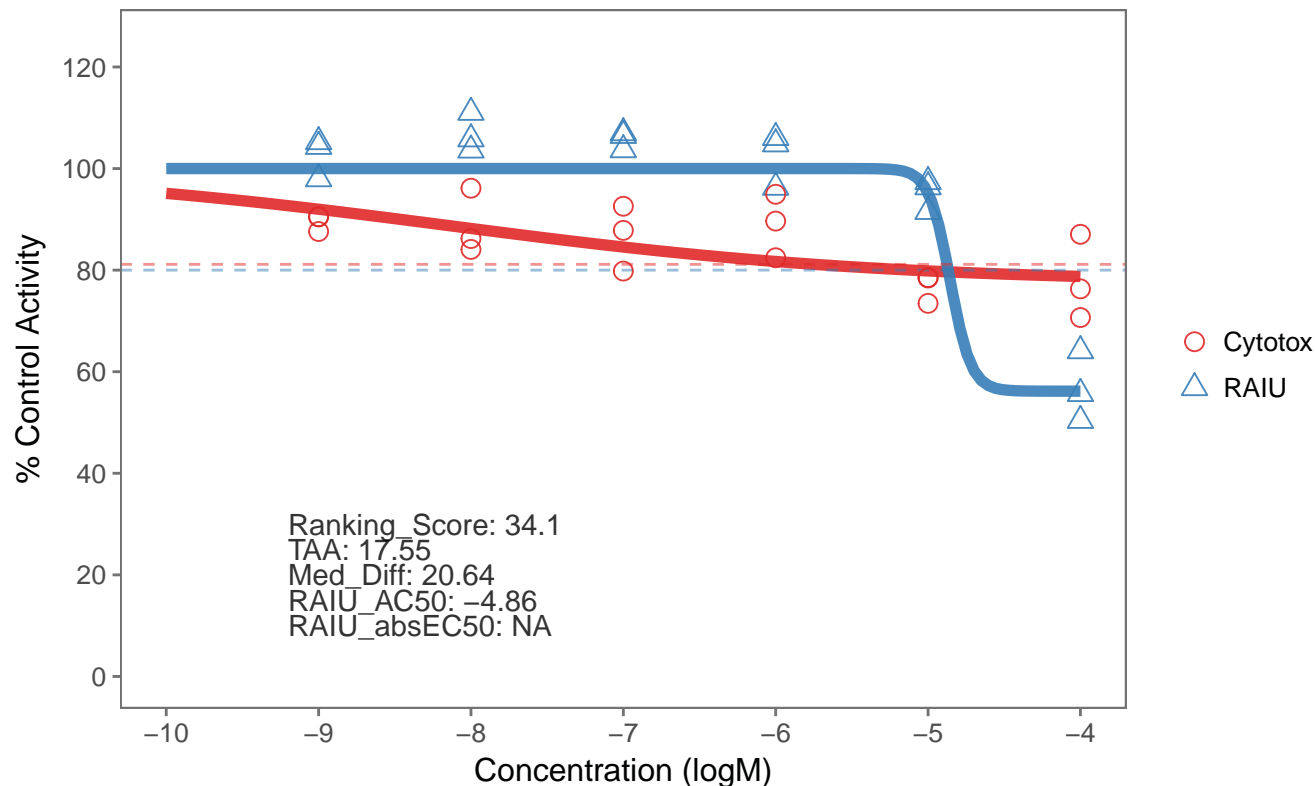

48. SPID: TP0001963D10  
NAME: 2,4-Diisopropylphenol  
CAS NO: 2934-05-6

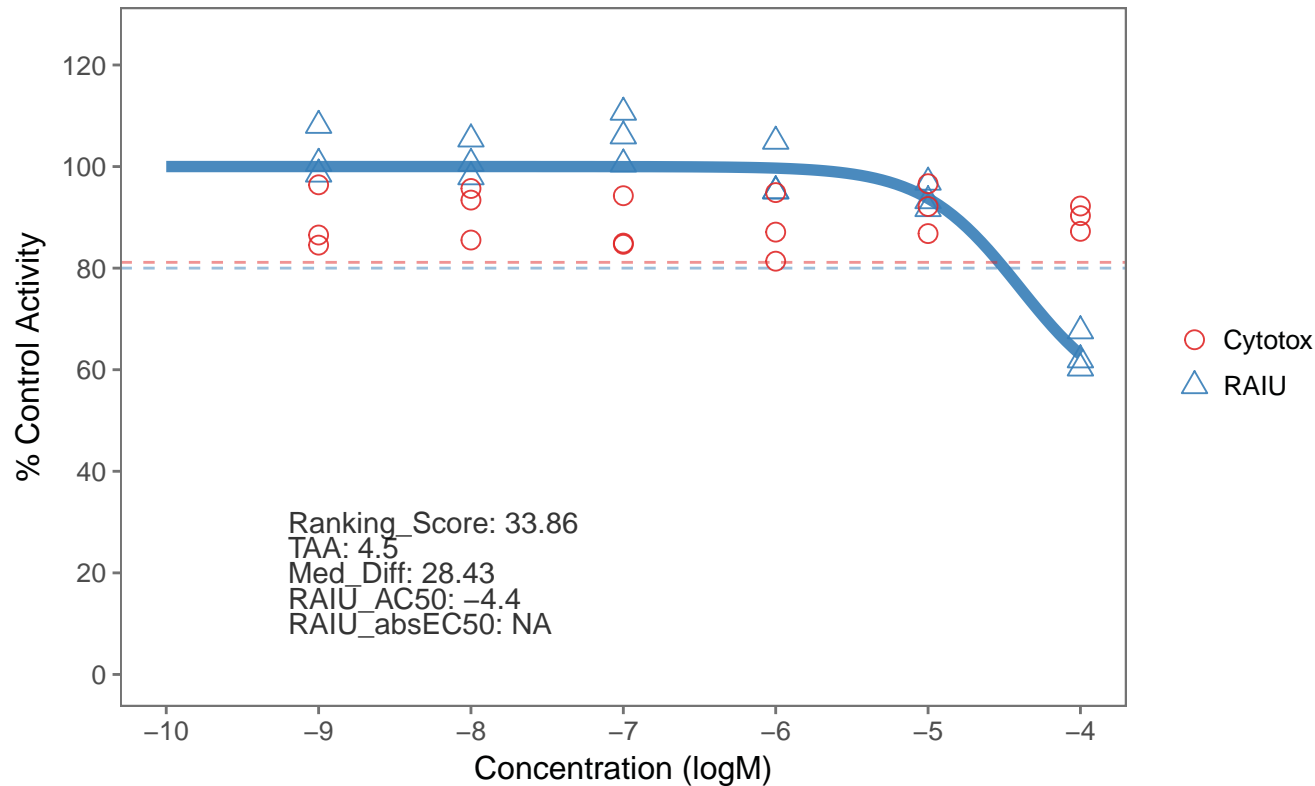



49. SPID: TP0001957D05  
NAME: Phenyl salicylate  
CAS NO: 118-55-8

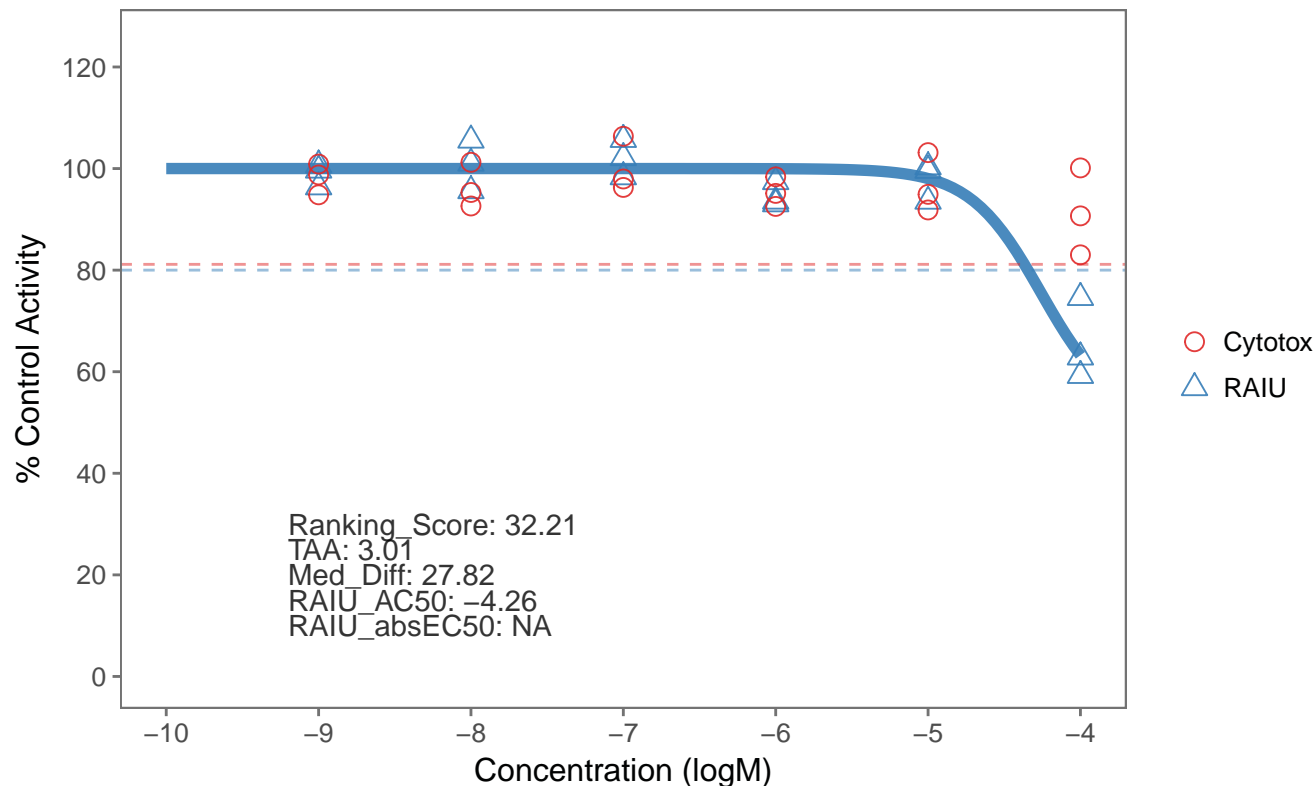

50. SPID: TP0001956B11

NAME: Temephos

CAS NO: 3383-96-8

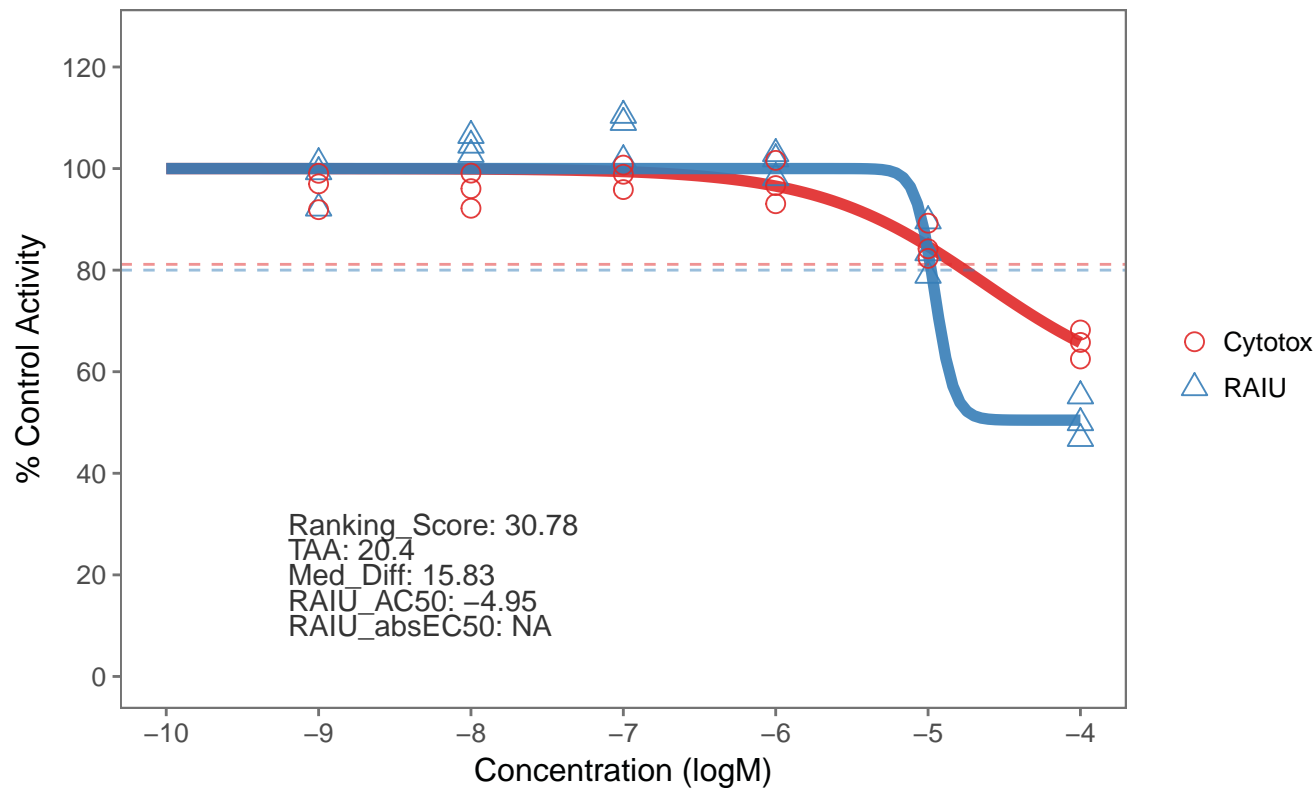

51. SPID: TP0001952C07

NAME: Iopanoic acid

CAS NO: 96-83-3

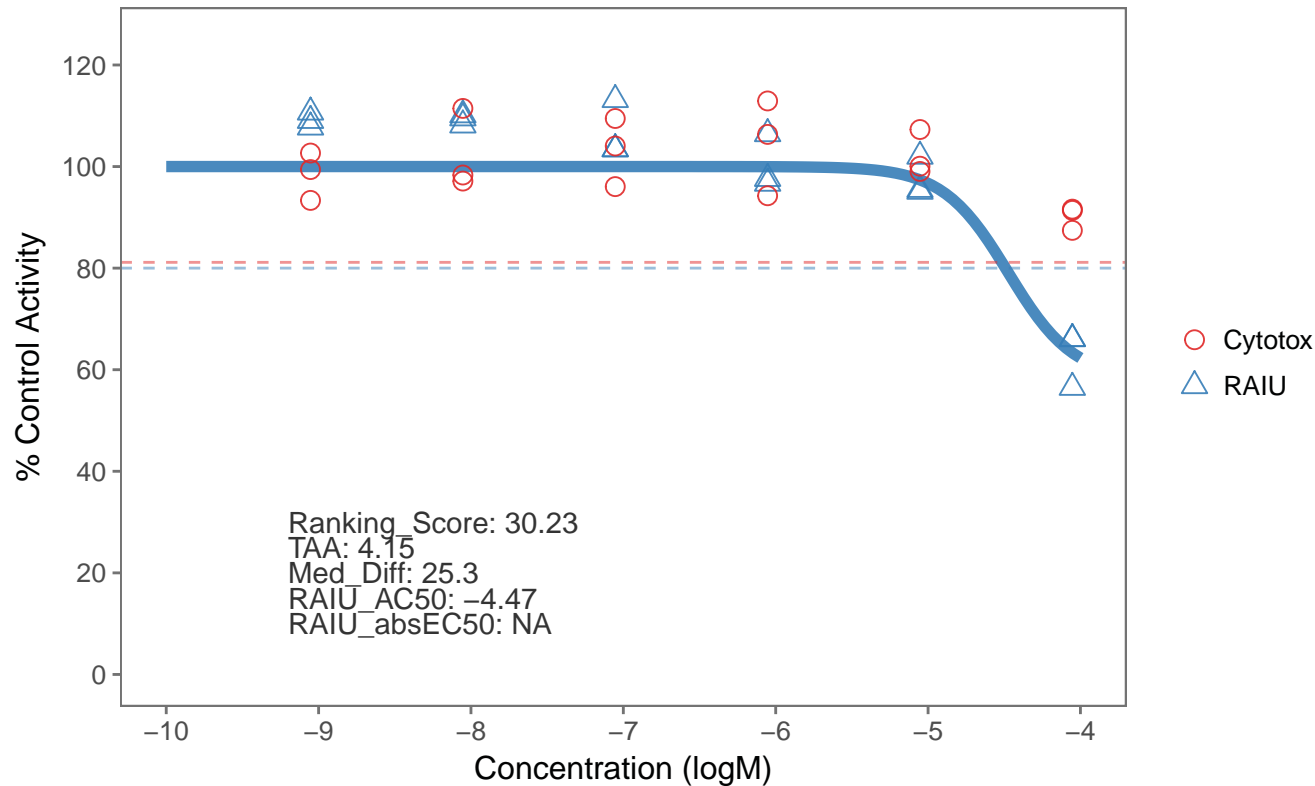

52. SPID: TP0001956C04  
NAME: Fenoxaprop-P-ethyl  
CAS NO: 71283-80-2

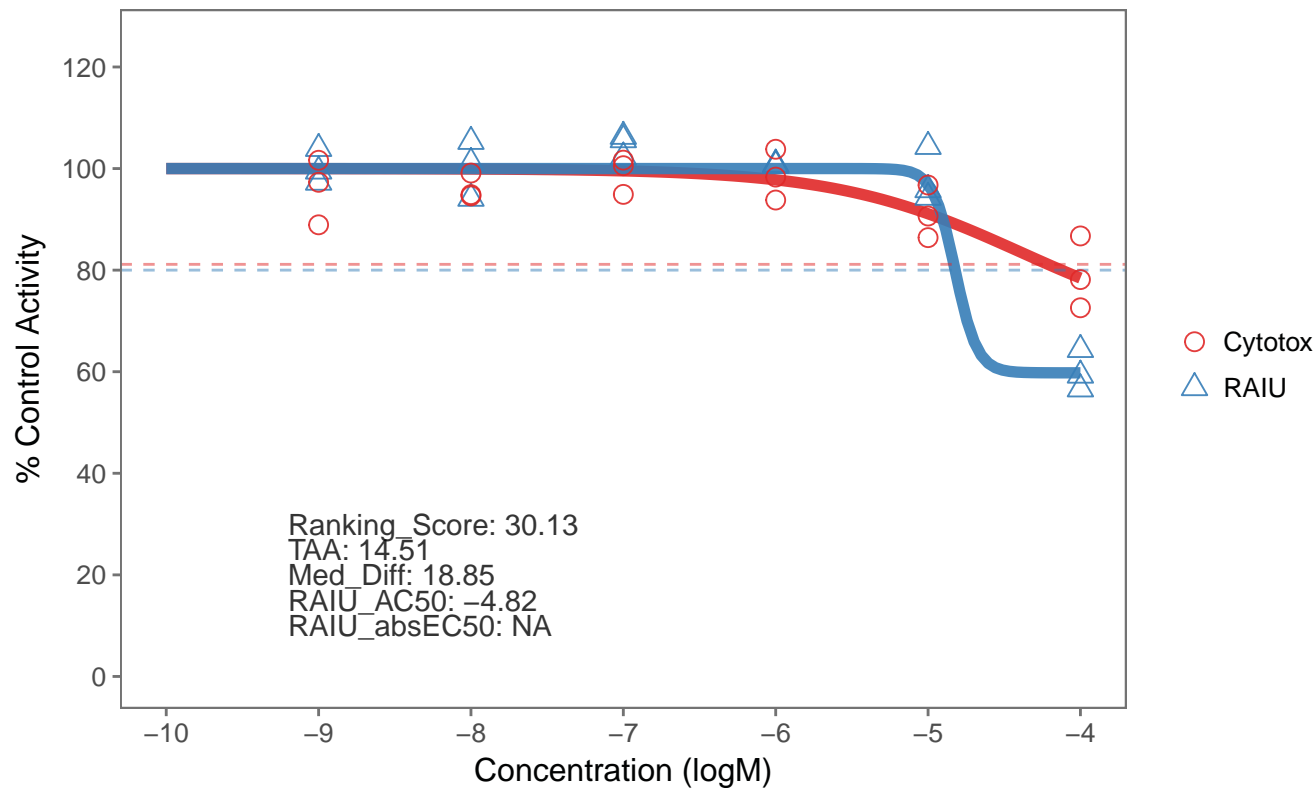

53. SPID: TP0001956B08

NAME: Sulprofos

CAS NO: 35400-43-2

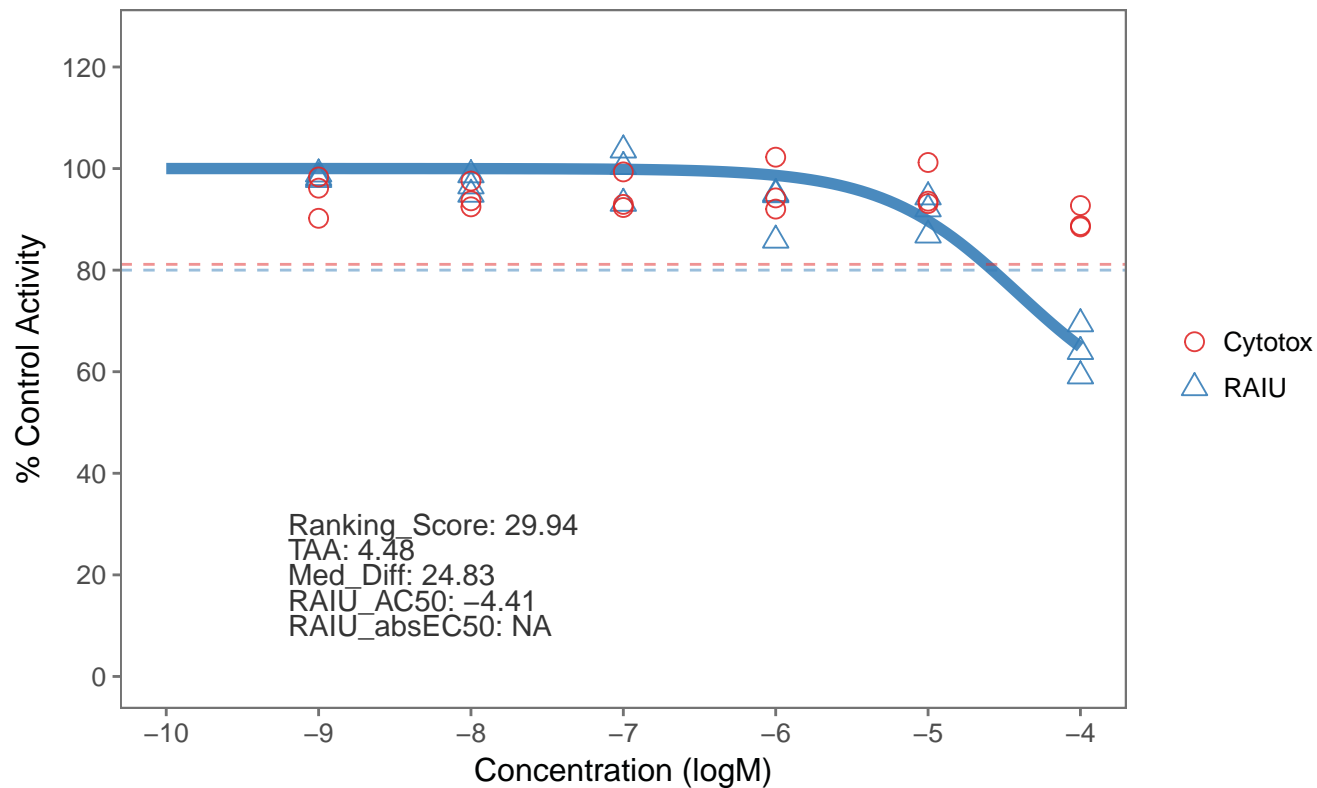

54. SPID: TP0001962E02  
NAME: Bisphenol A  
CAS NO: 80-05-7

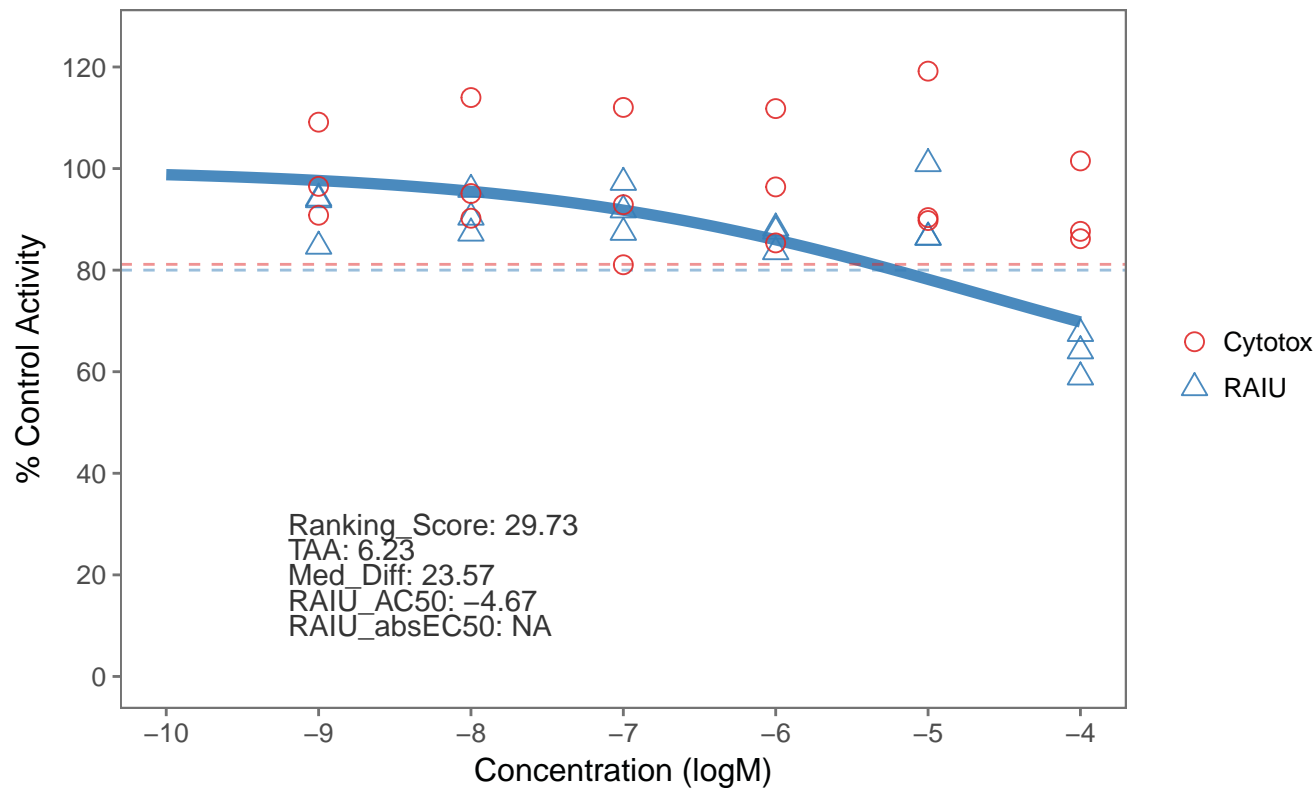

55. SPID: TP0001964F07  
NAME: Biochanin A  
CAS NO: 491-80-5

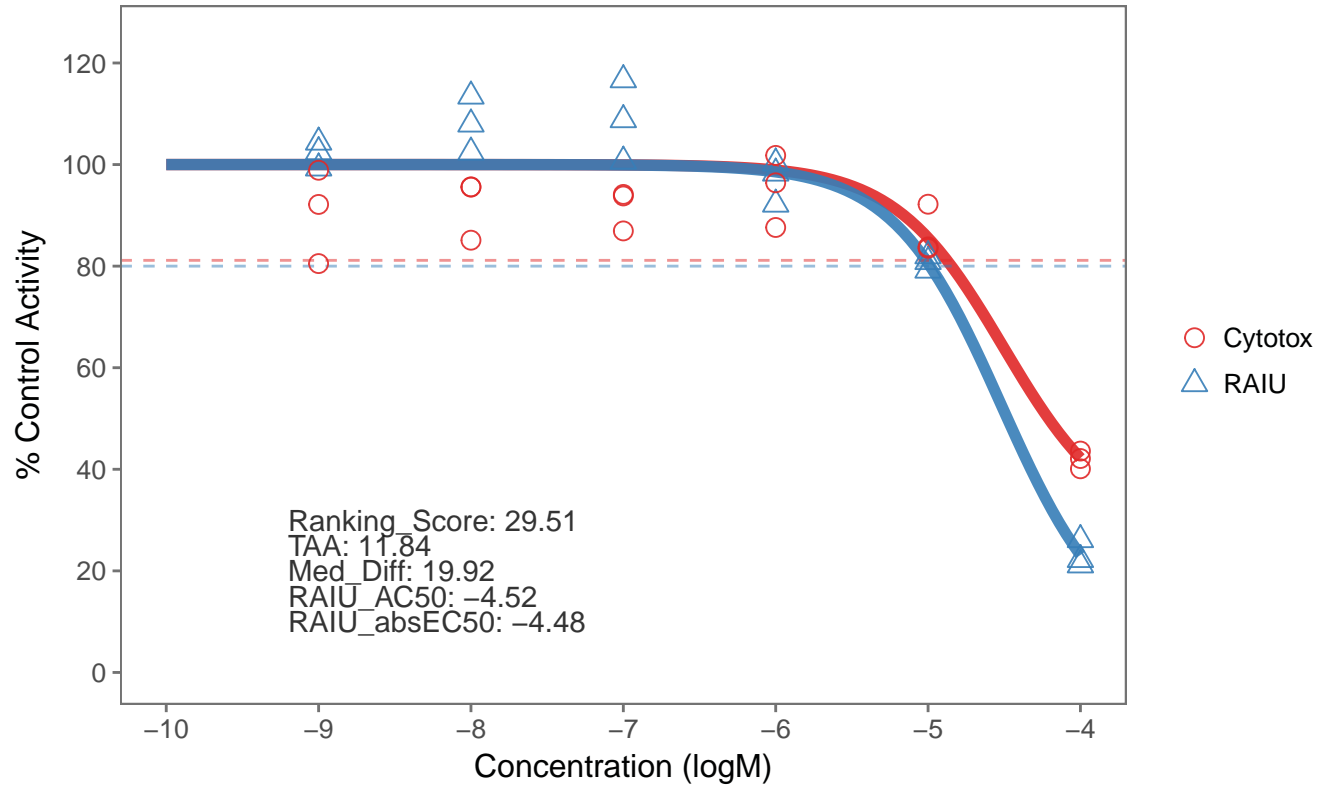

56. SPID: TP0001953B01

NAME: Triforine

CAS NO: 26644-46-2

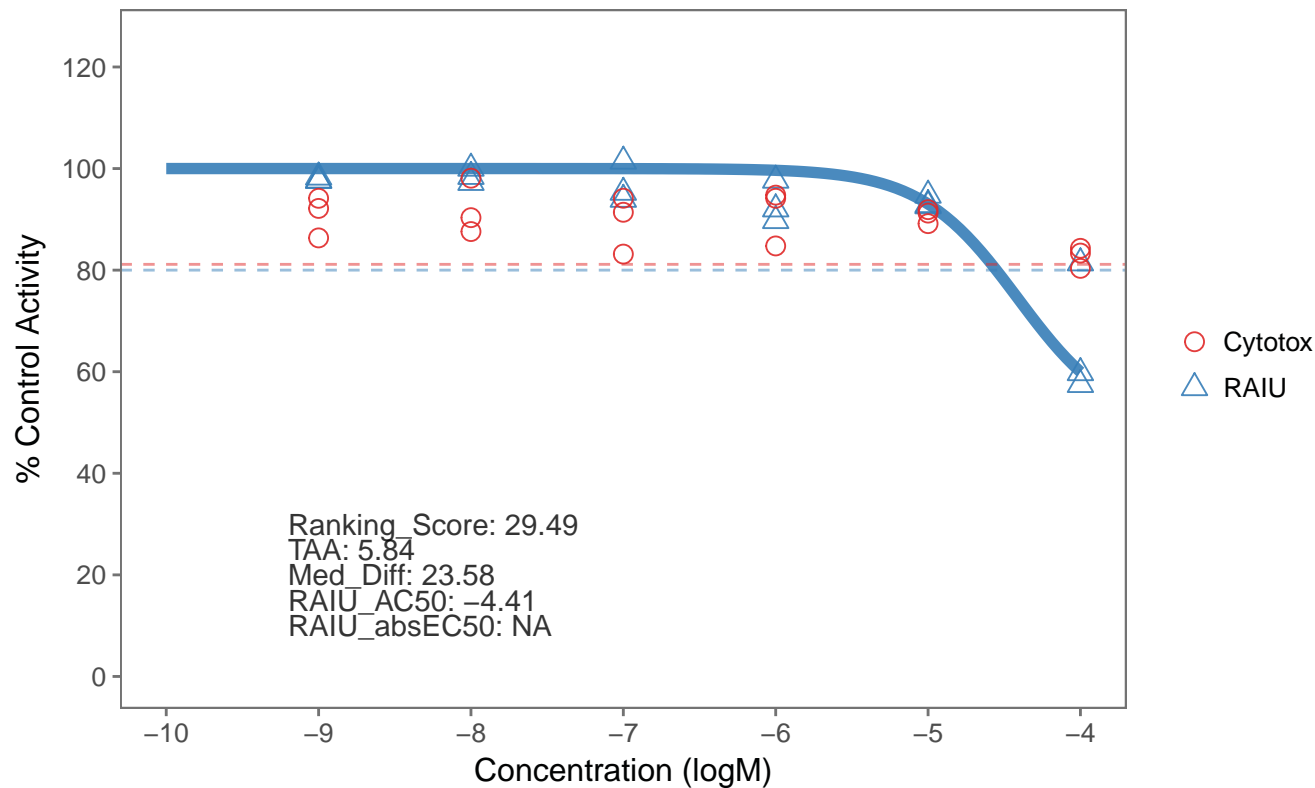



57. SPID: TP0001957G03

NAME: Propofol

CAS NO: 2078-54-8

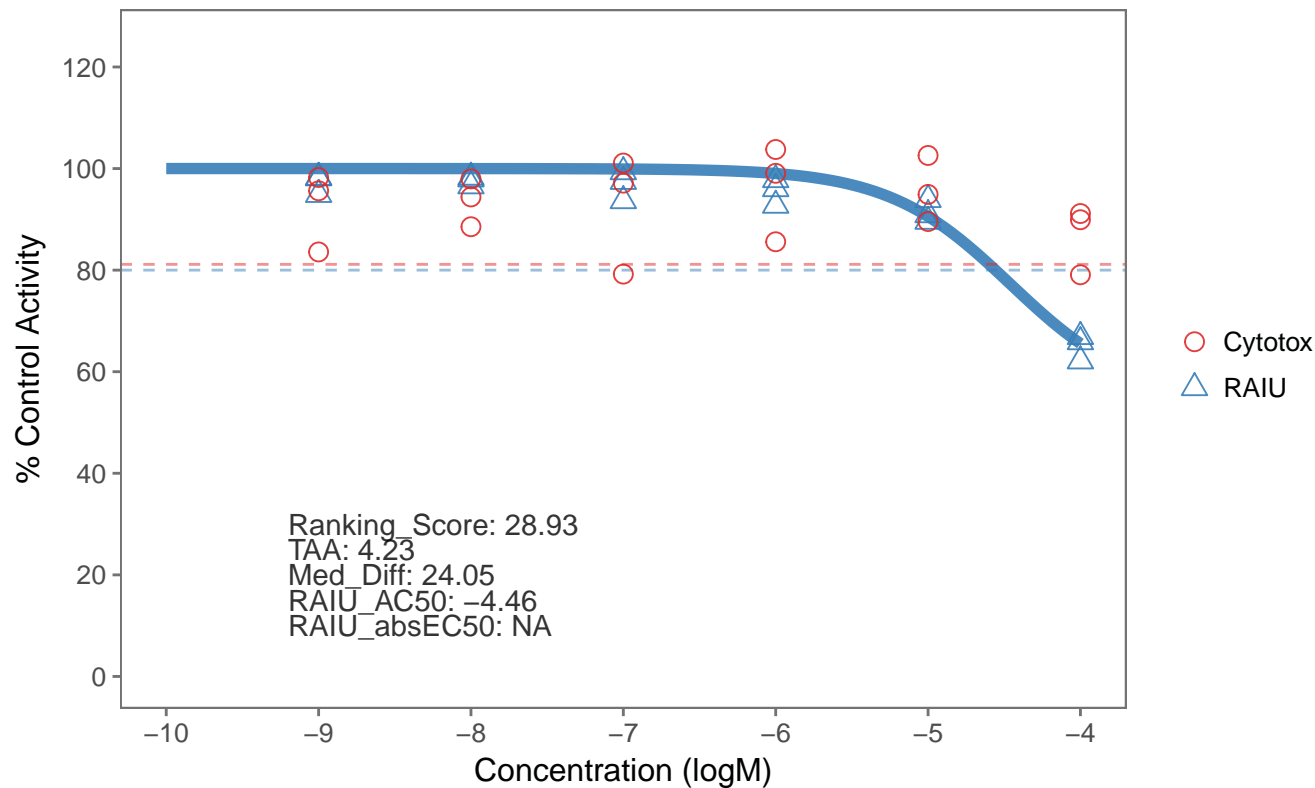

58. SPID: TP0001956G03  
NAME: Benzalkonium chloride  
CAS NO: 8001-54-5

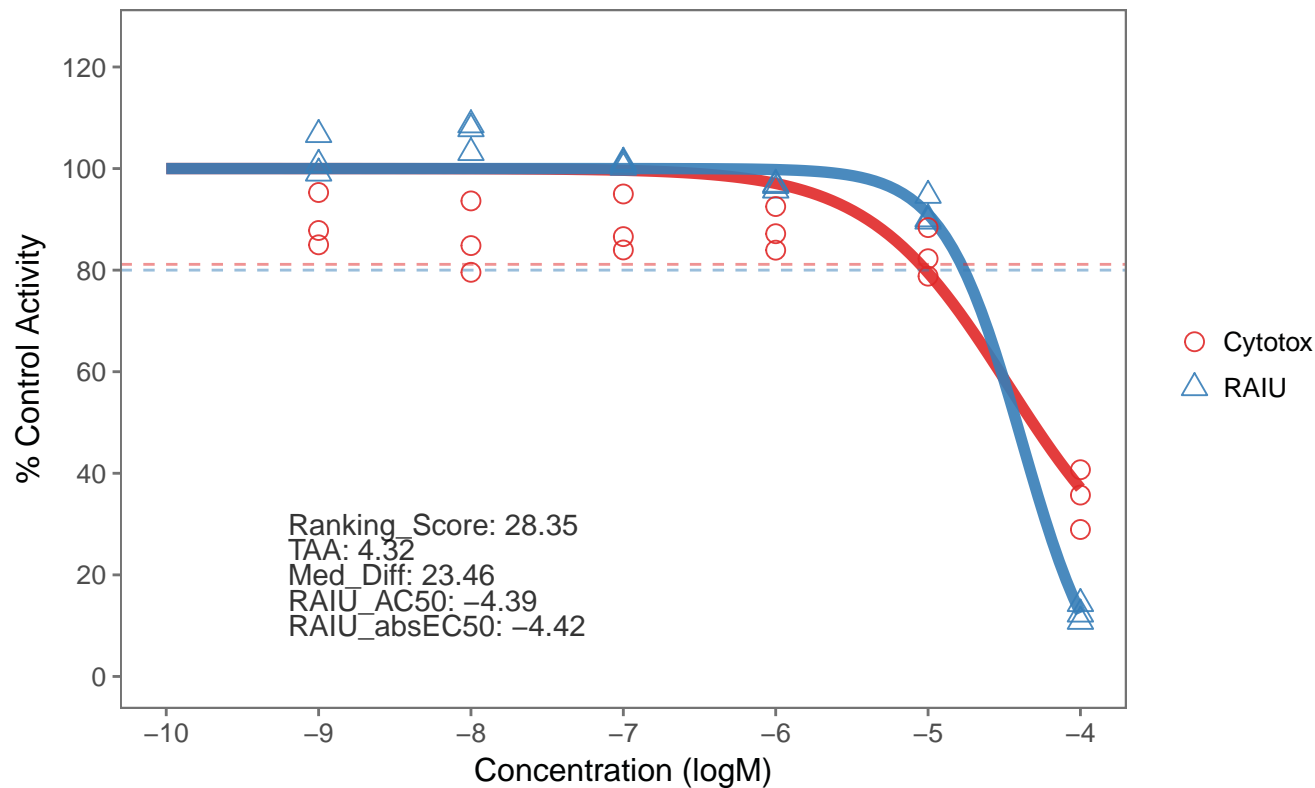

59. SPID: TP0001958B02  
NAME: Hexadecyltrimethylammonium bromide  
CAS NO: 57-09-0

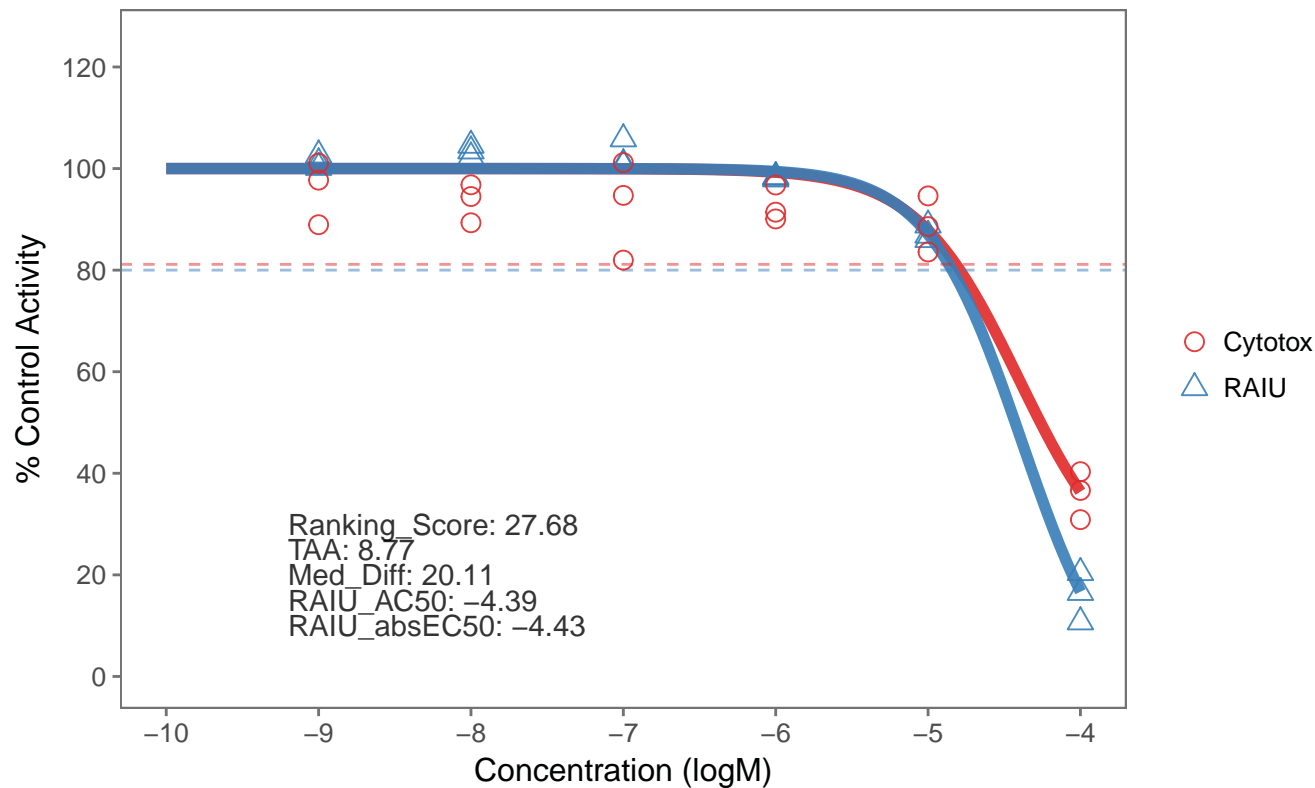

60. SPID: TP0001962B11  
NAME: Phenylacetaldehyde  
CAS NO: 122-78-1

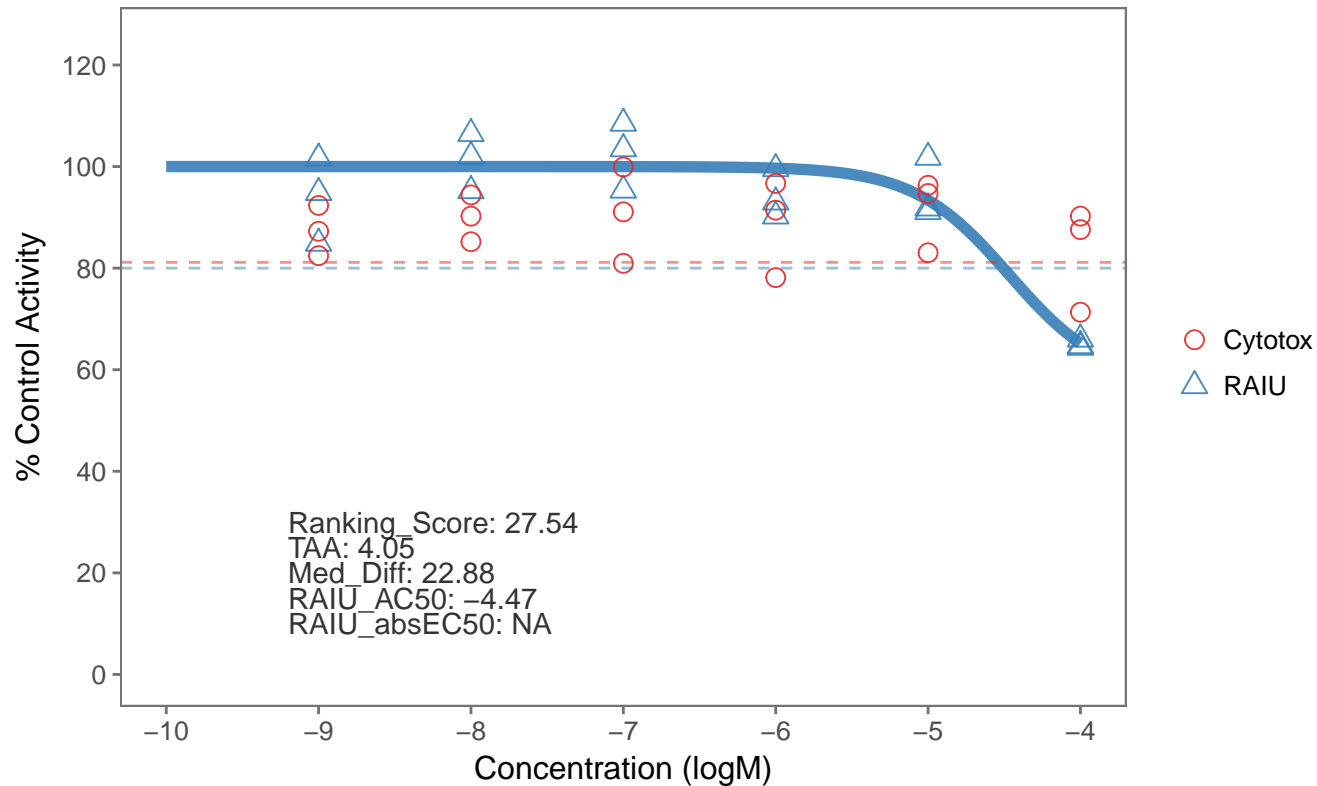

61. SPID: TP0001958D11  
NAME: Tributyltetradecylphosphonium chloride  
CAS NO: 81741-28-8

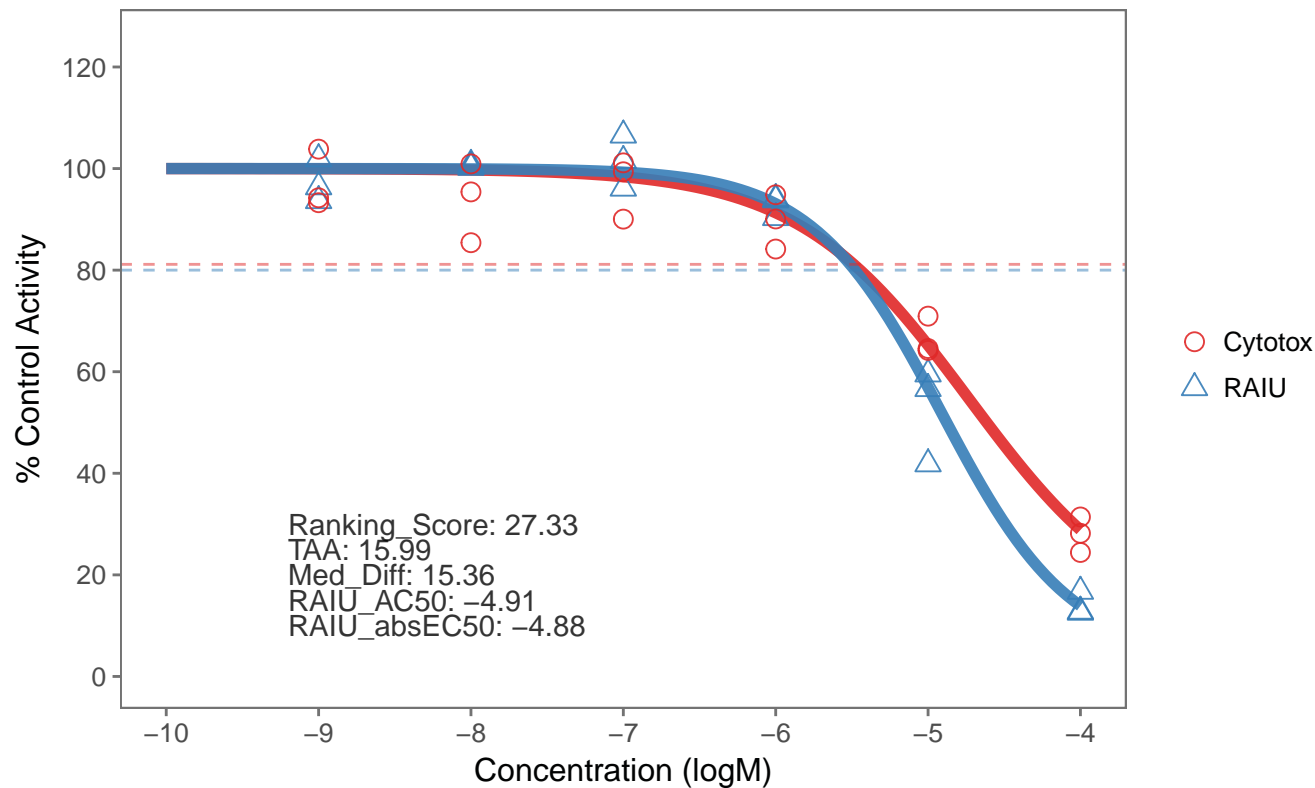

62. SPID: TP0001962H12  
NAME: 2,6-Di-tert-butyl-4-ethylphenol  
CAS NO: 4130-42-1

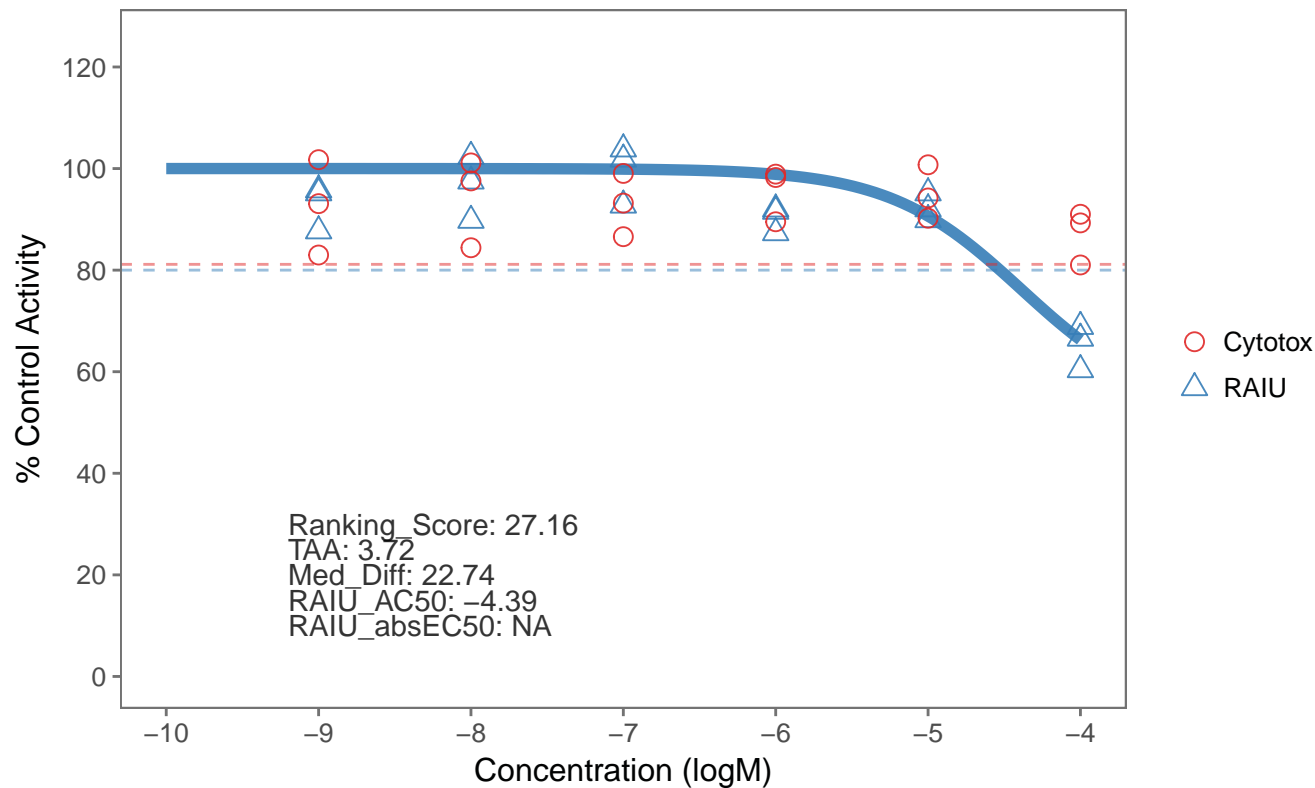

63. SPID: TP0001953D02  
NAME: 4,4'-Dithiodimorpholine  
CAS NO: 103-34-4

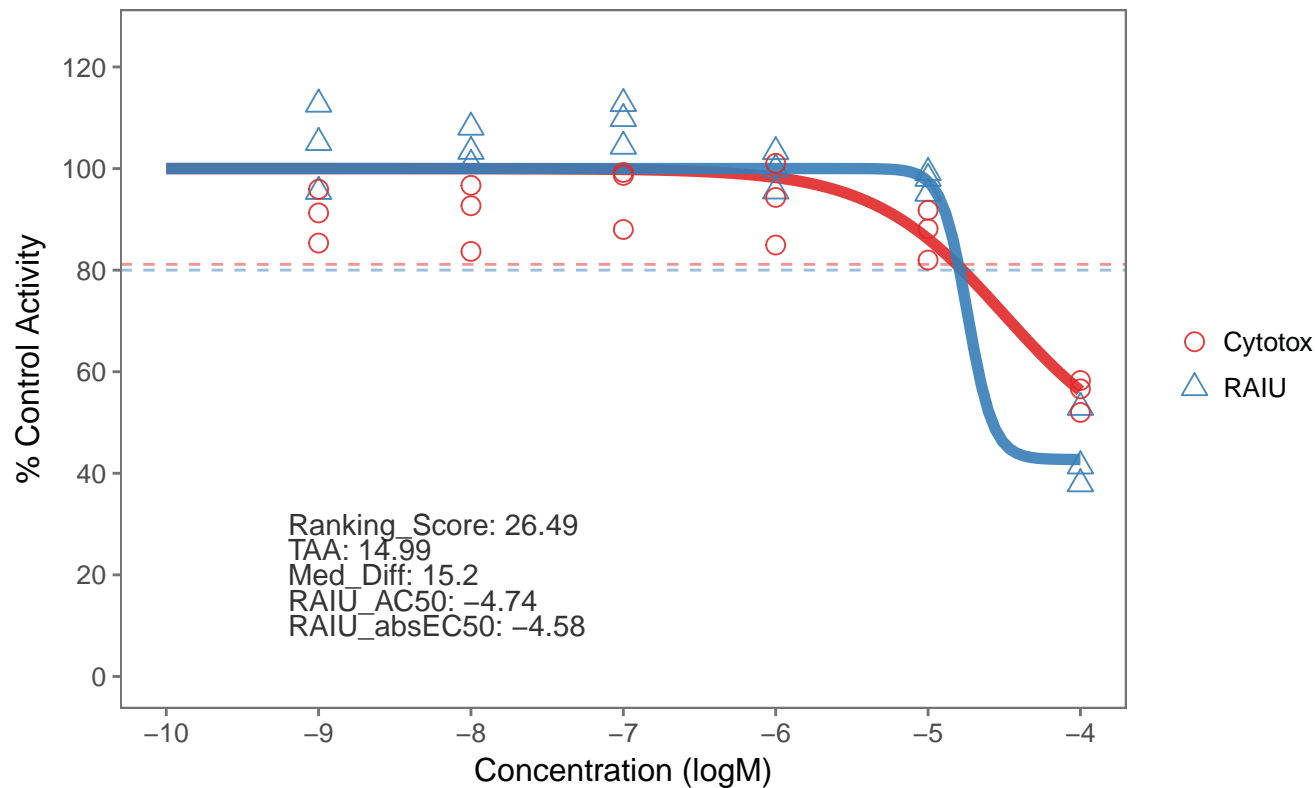

64. SPID: TP0001952E03  
NAME: Triclosan  
CAS NO: 3380-34-5

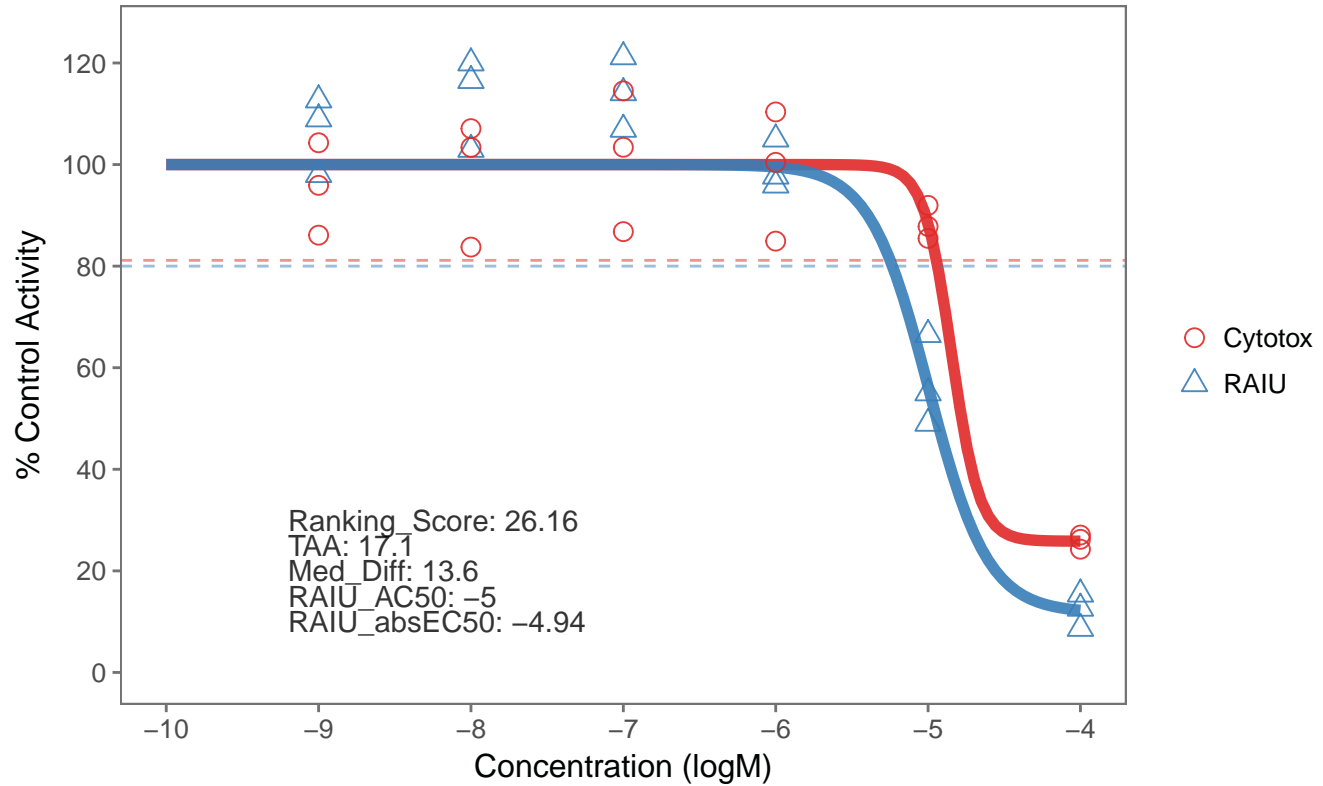



65. SPID: TP0001957E01  
NAME: 1,2,5,6,9,10-Hexabromocyclododecane  
CAS NO: 3194-55-6

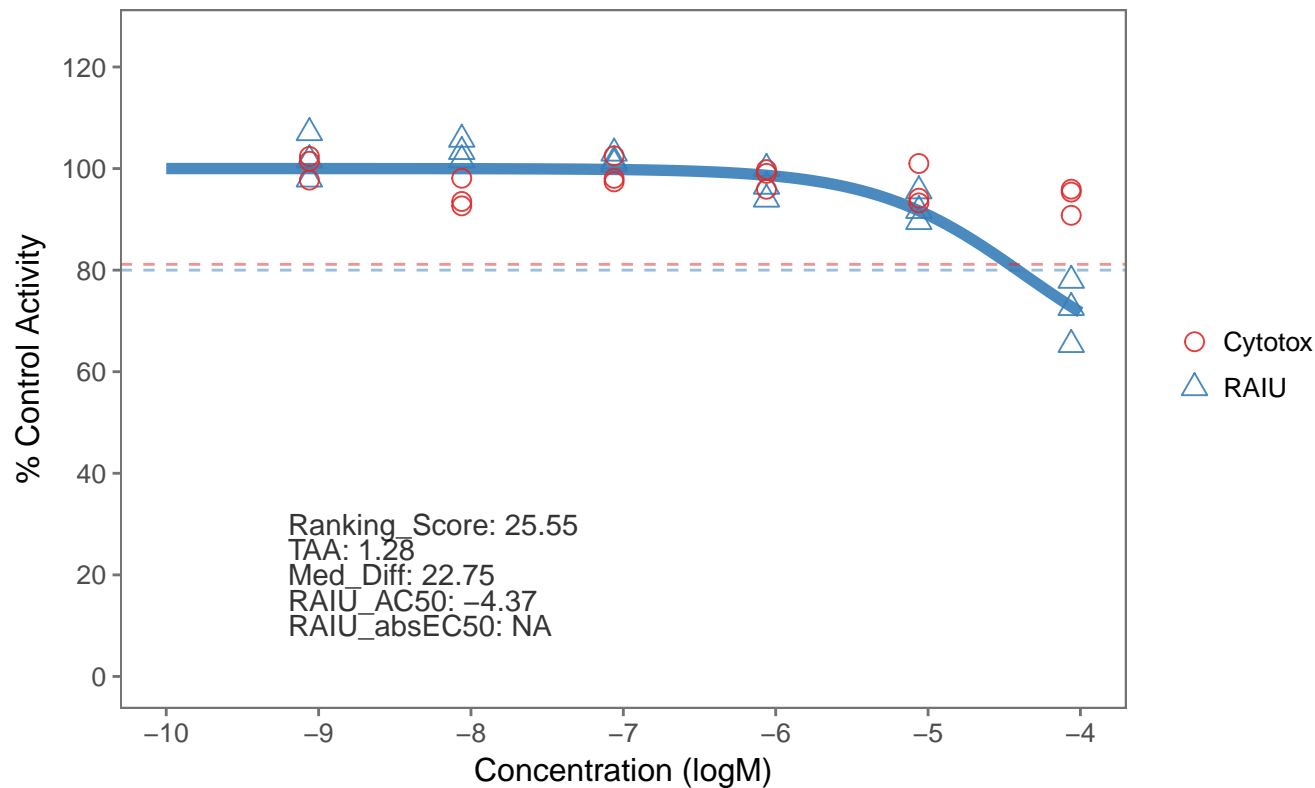

66. SPID: TP0001954D08

NAME: Dichlorophen

CAS NO: 97-23-4

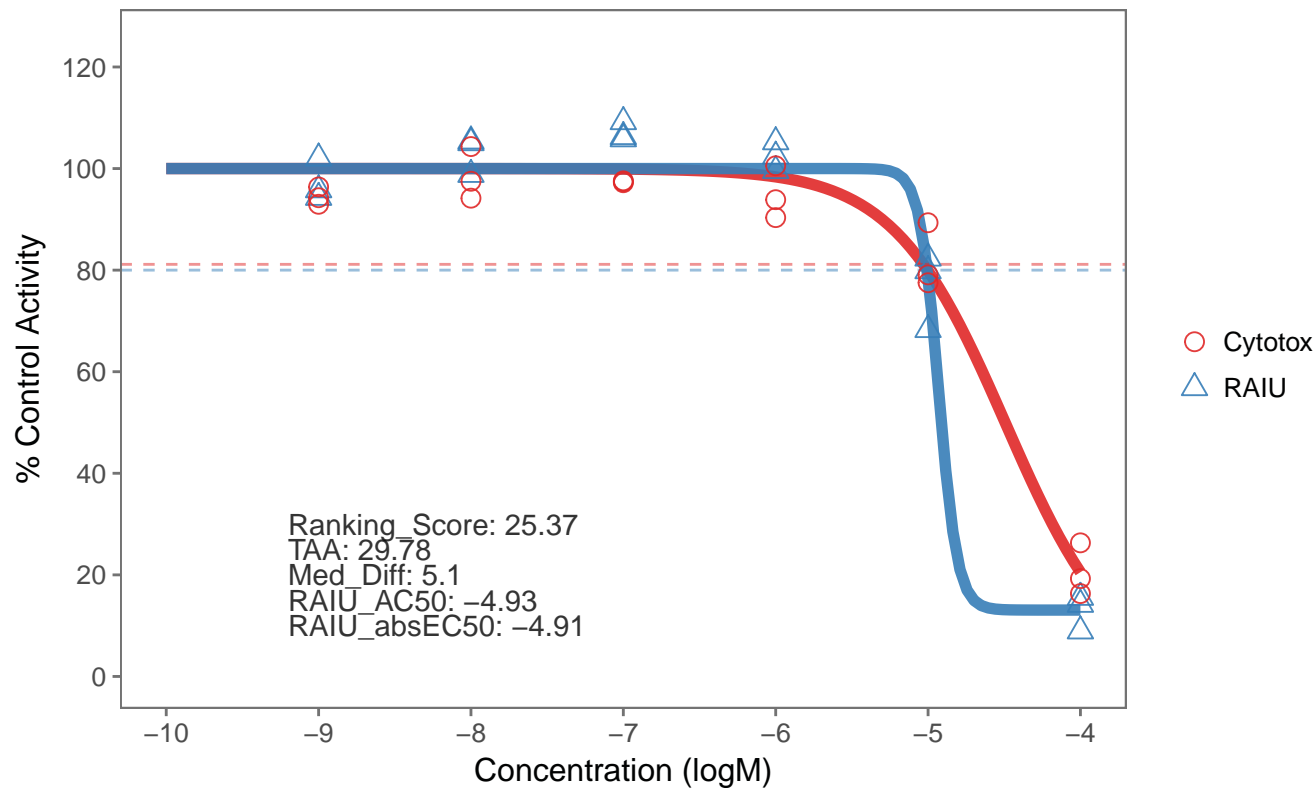

67. SPID: TP0001962E07  
NAME: 1-(Bromomethyl)-3-phenoxybenzene  
CAS NO: 51632-16-7

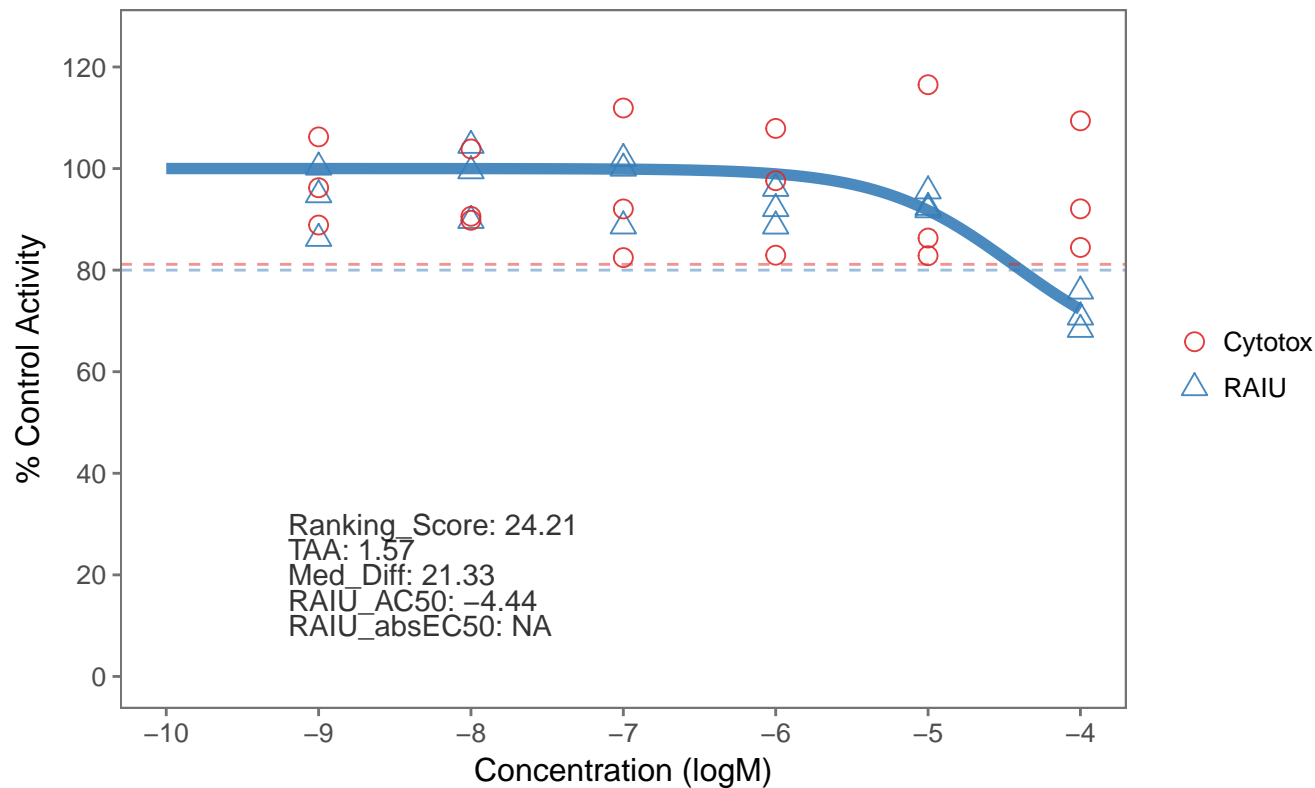

68. SPID: TP0001958G05  
NAME: Silwet L 77  
CAS NO: 27306-78-1

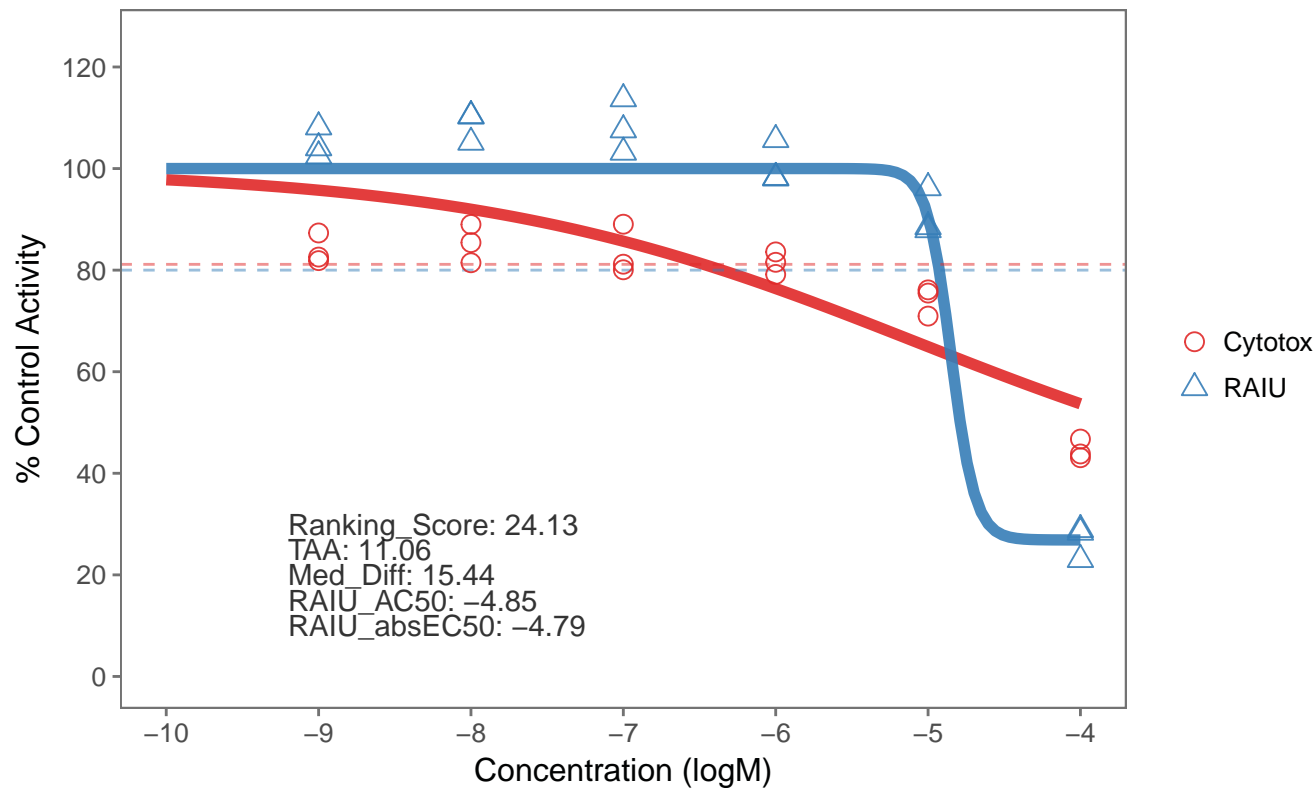

69. SPID: TP0001956G10  
NAME: Triphenylethylene  
CAS NO: 58-72-0

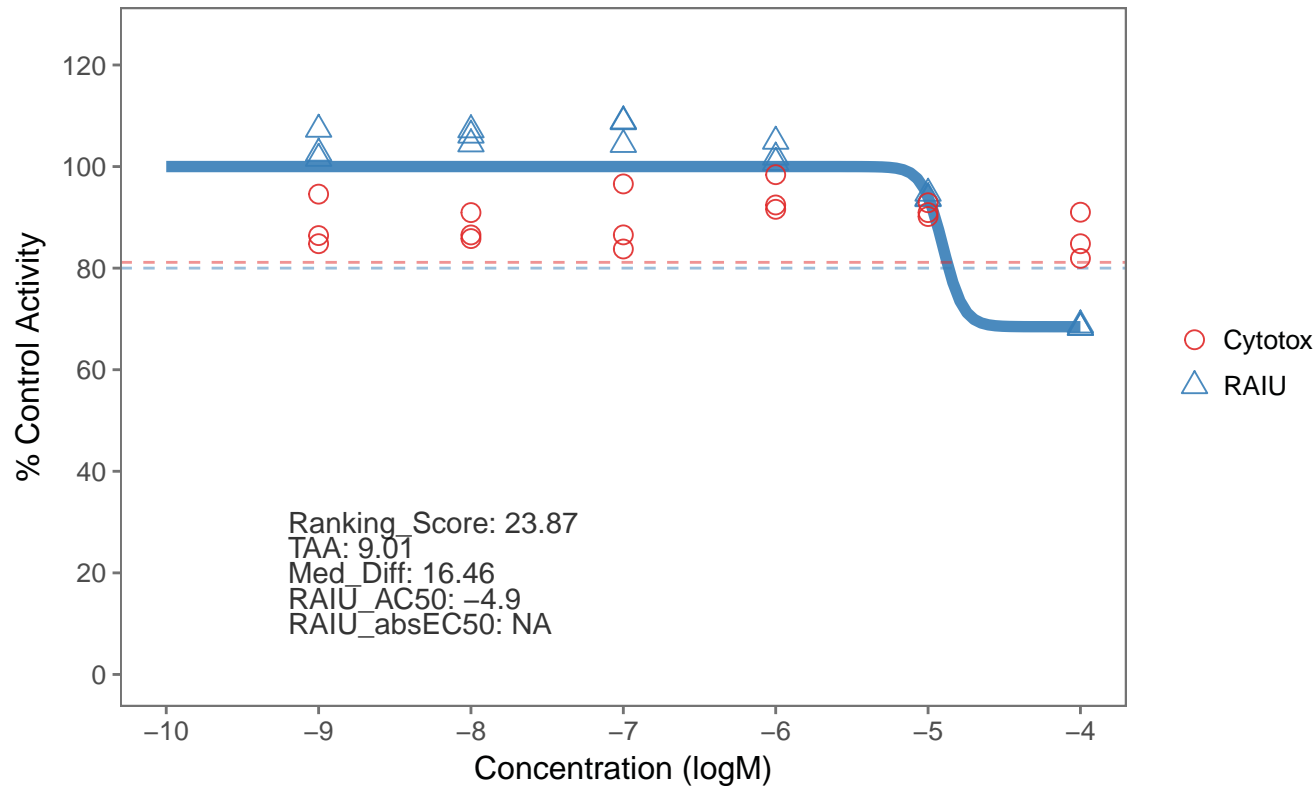

70. SPID: TP0001964F10  
NAME: Dinocap  
CAS NO: 39300-45-3

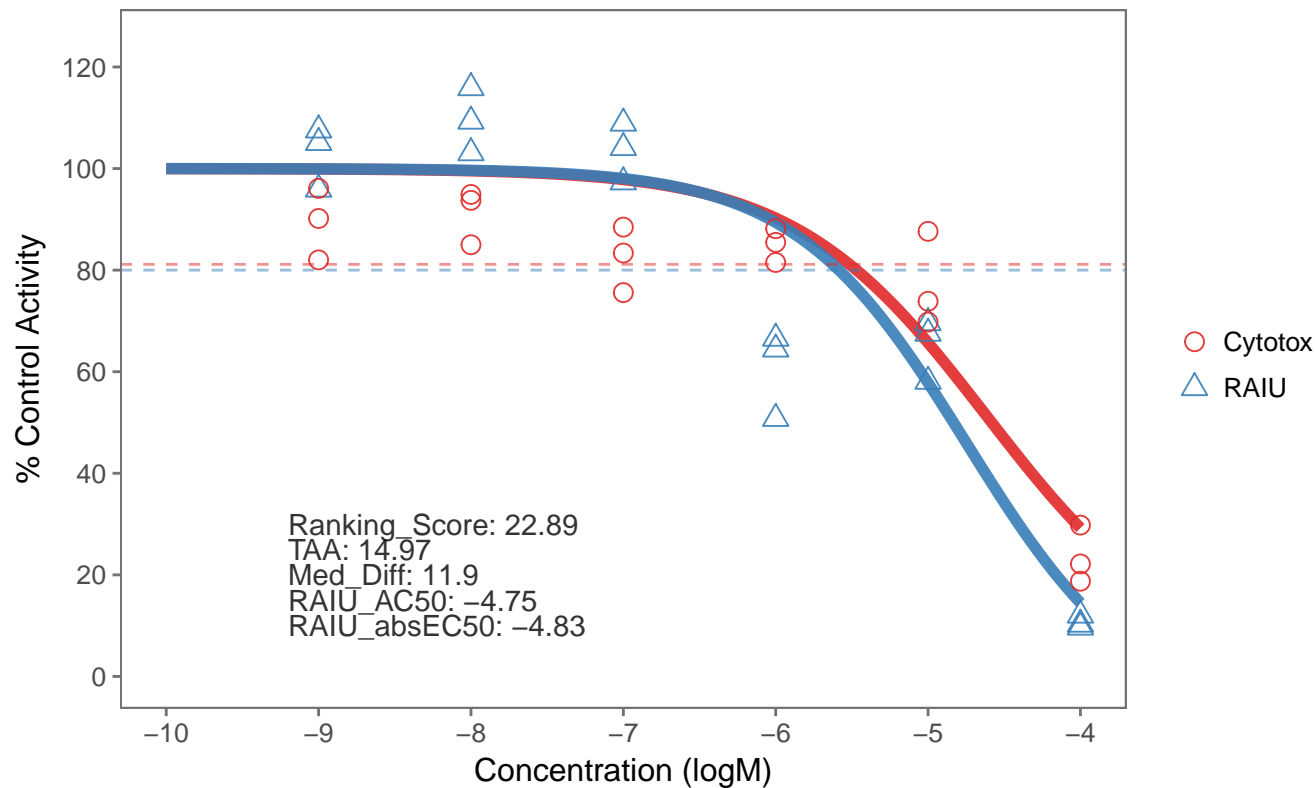

71. SPID: TP0001964E09  
NAME: Ethyl 1-naphthaleneacetate  
CAS NO: 2122-70-5

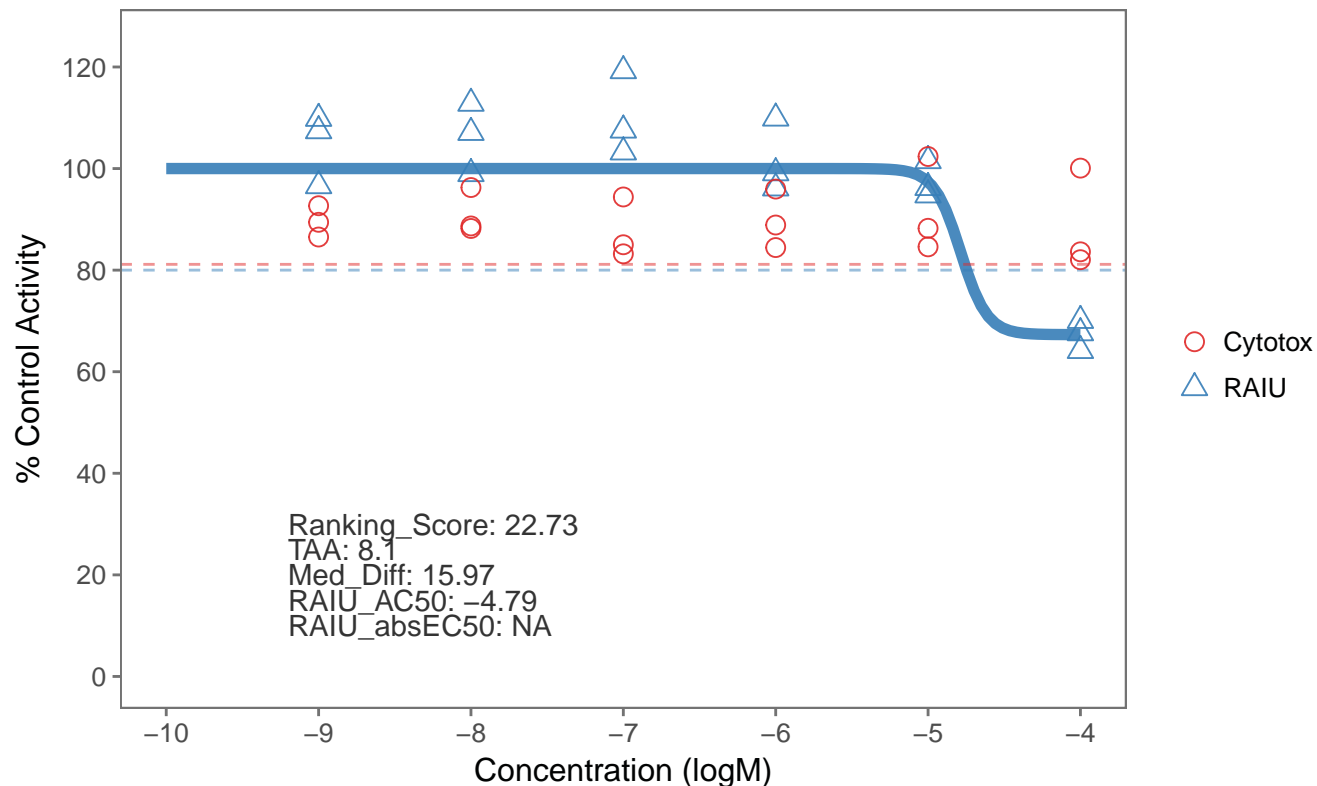

72. SPID: TP0001953F03  
NAME: 2,2'-Methylenebis(4-methyl-6-tert-butylphenol)  
CAS NO: 119-47-1

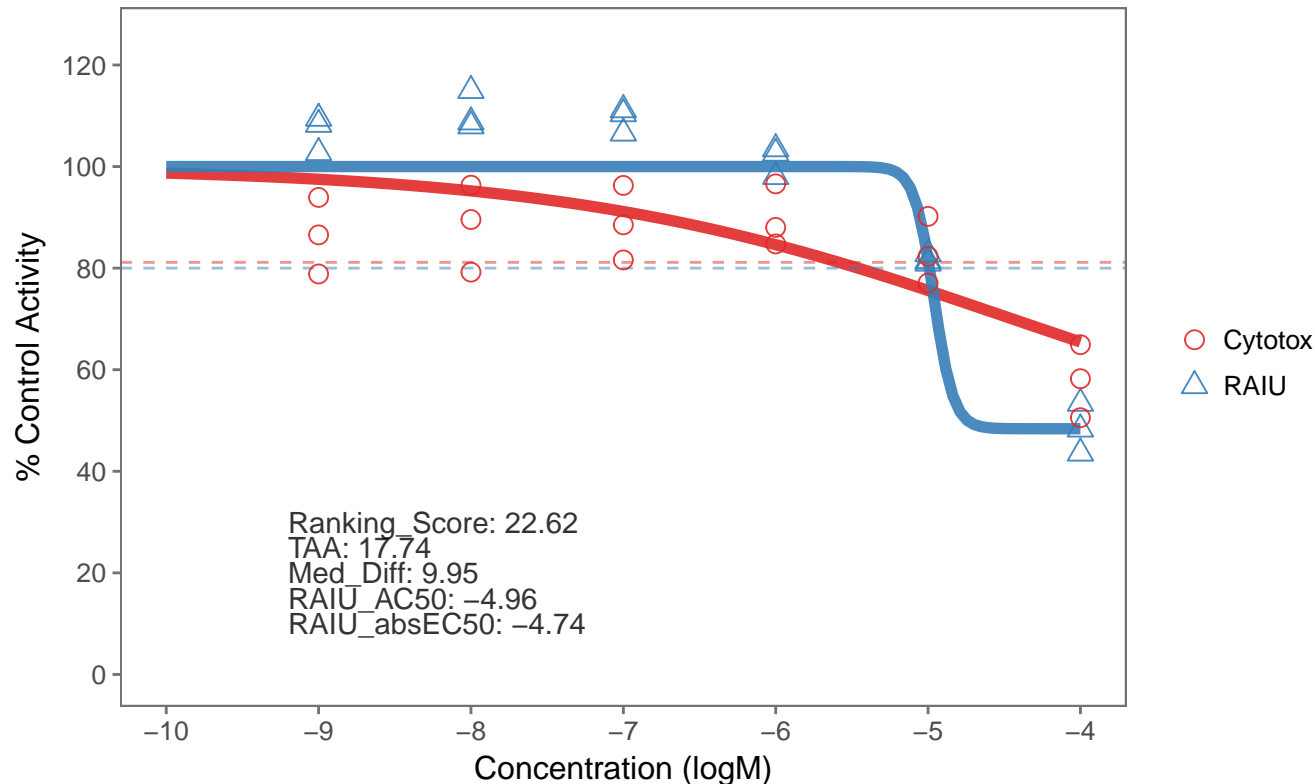



73. SPID: TP0001962G04  
NAME: 2-Hydroxy-4-methoxybenzophenone  
CAS NO: 131-57-7

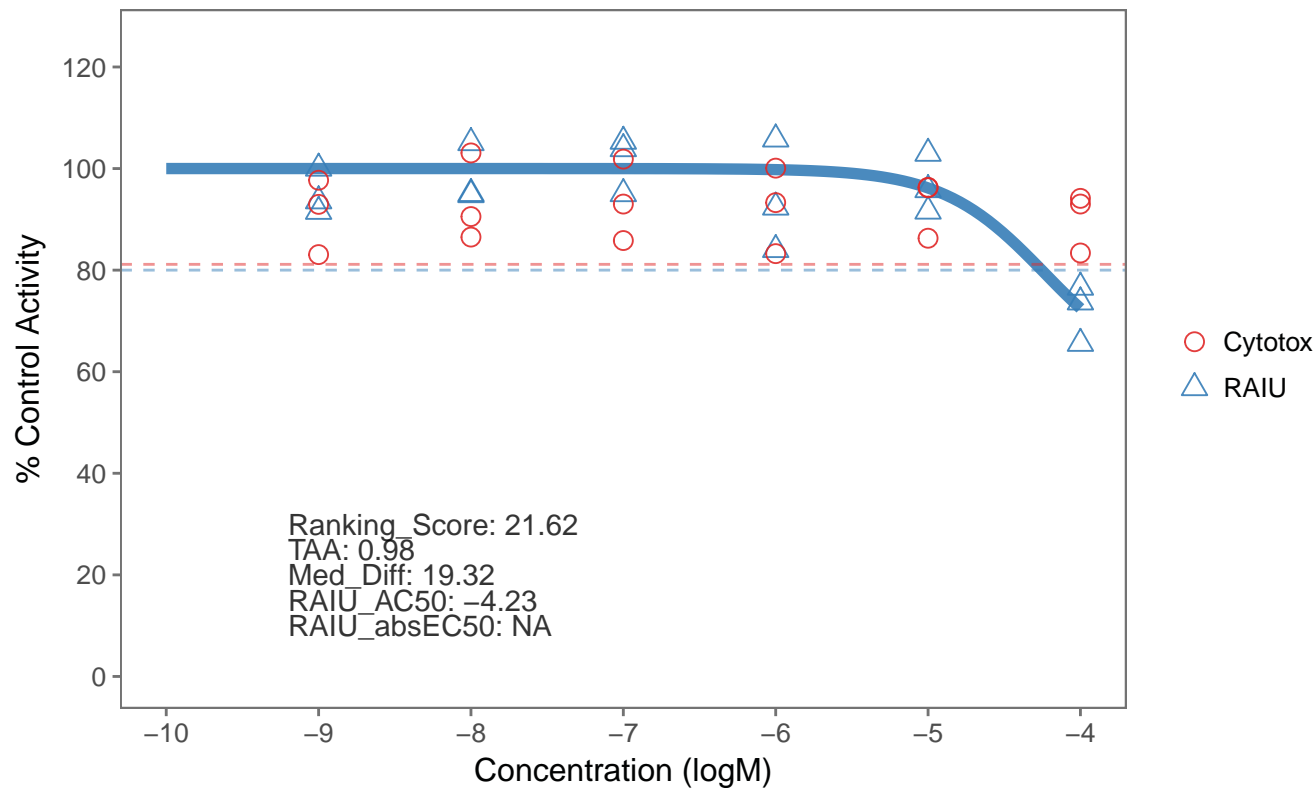

74. SPID: TP0001953D03  
NAME: Azoxystrobin  
CAS NO: 131860-33-8

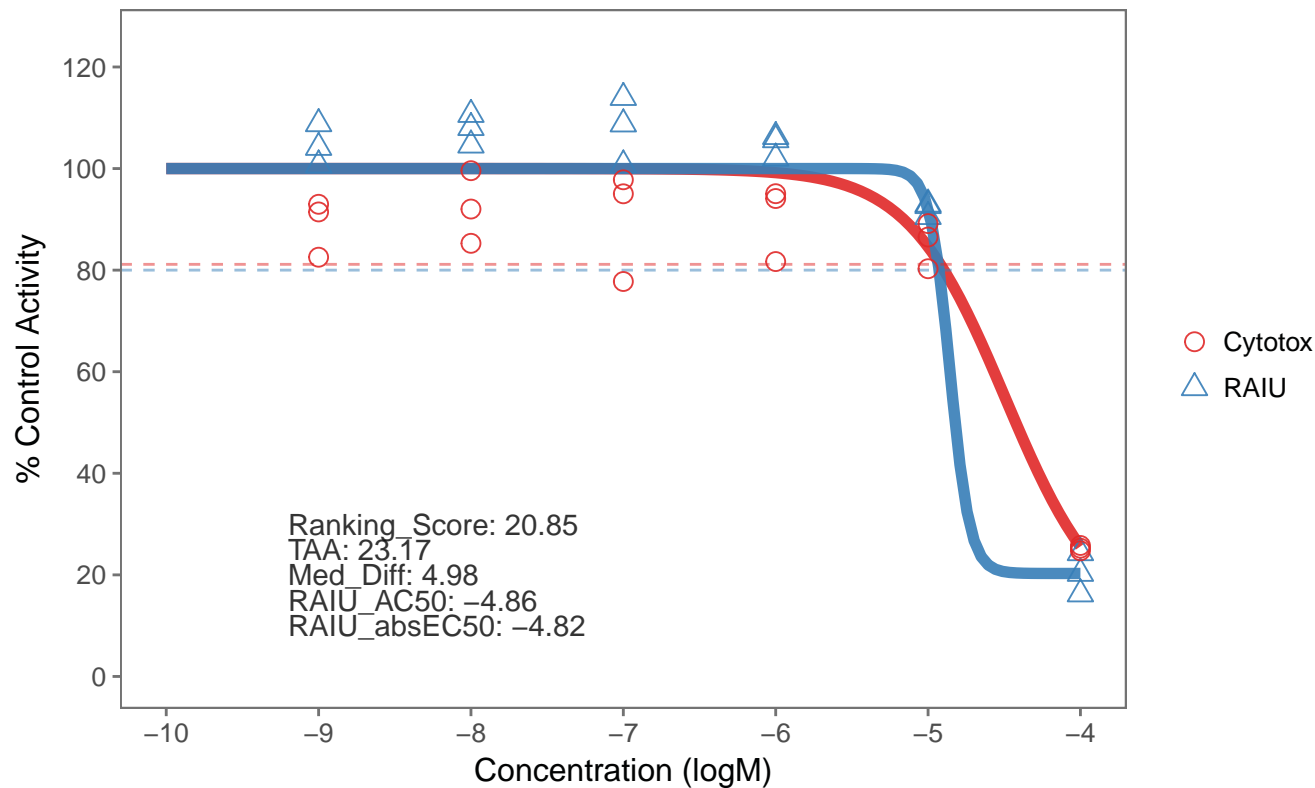

75. SPID: TP0001962G08  
NAME: Z-Tetrachlorvinphos  
CAS NO: 22248-79-9

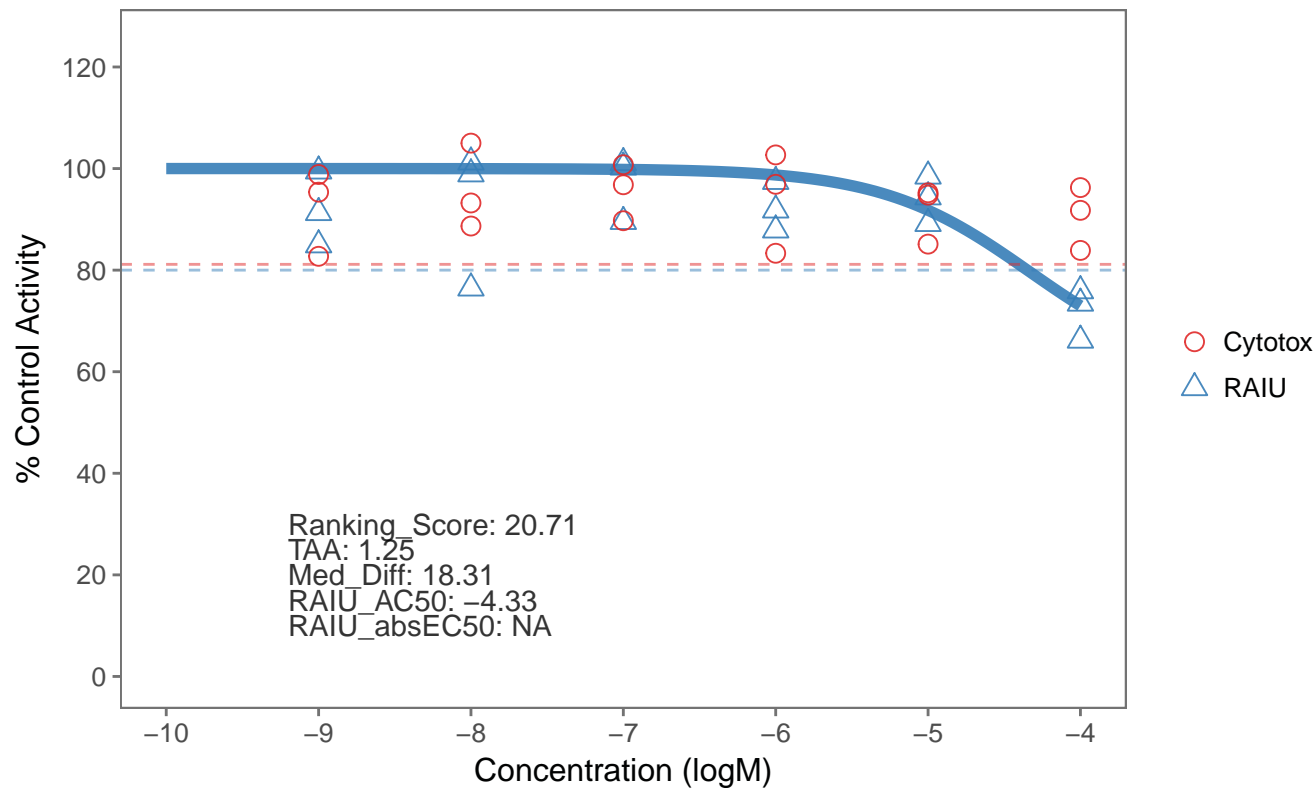

76. SPID: TP0001962C08

NAME: Phenylparaben

CAS NO: 17696-62-7

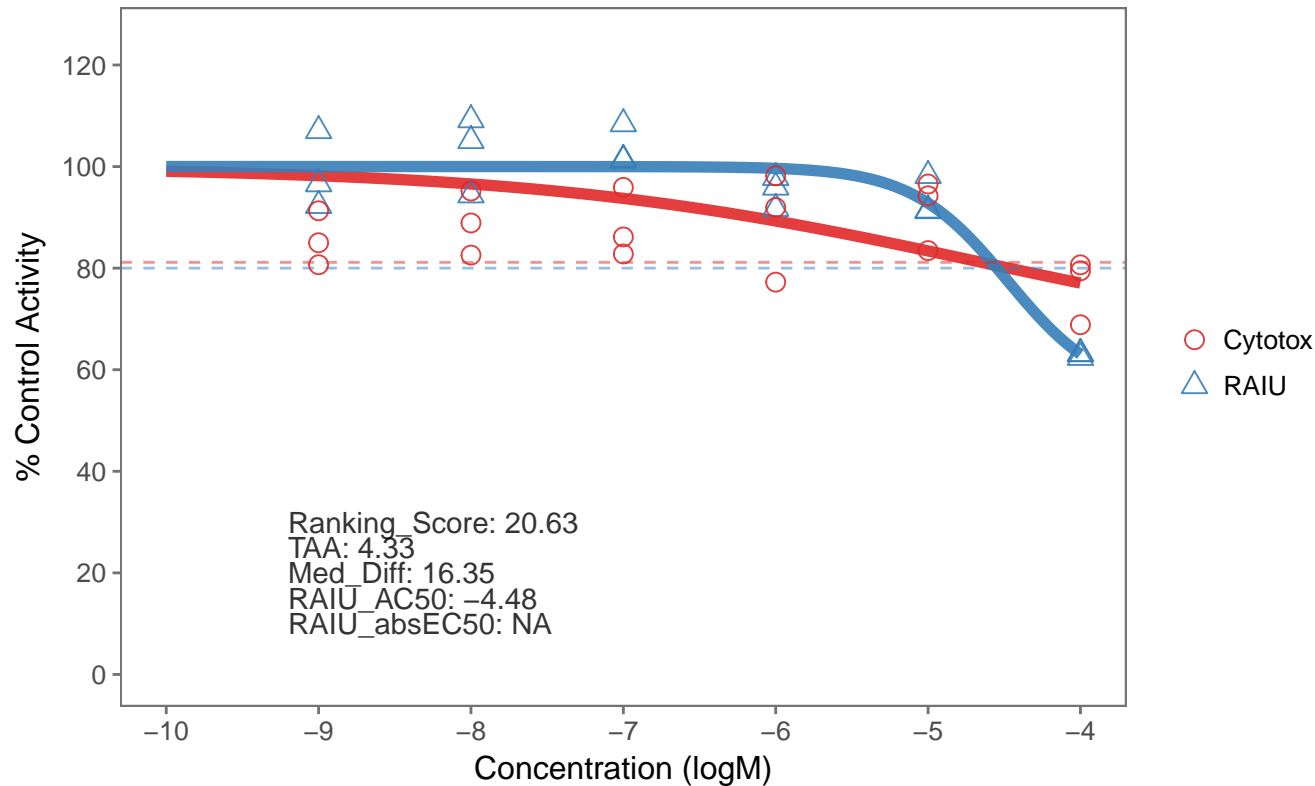

77. SPID: TP0001961D02  
NAME: Bisphenol A  
CAS NO: 80-05-7

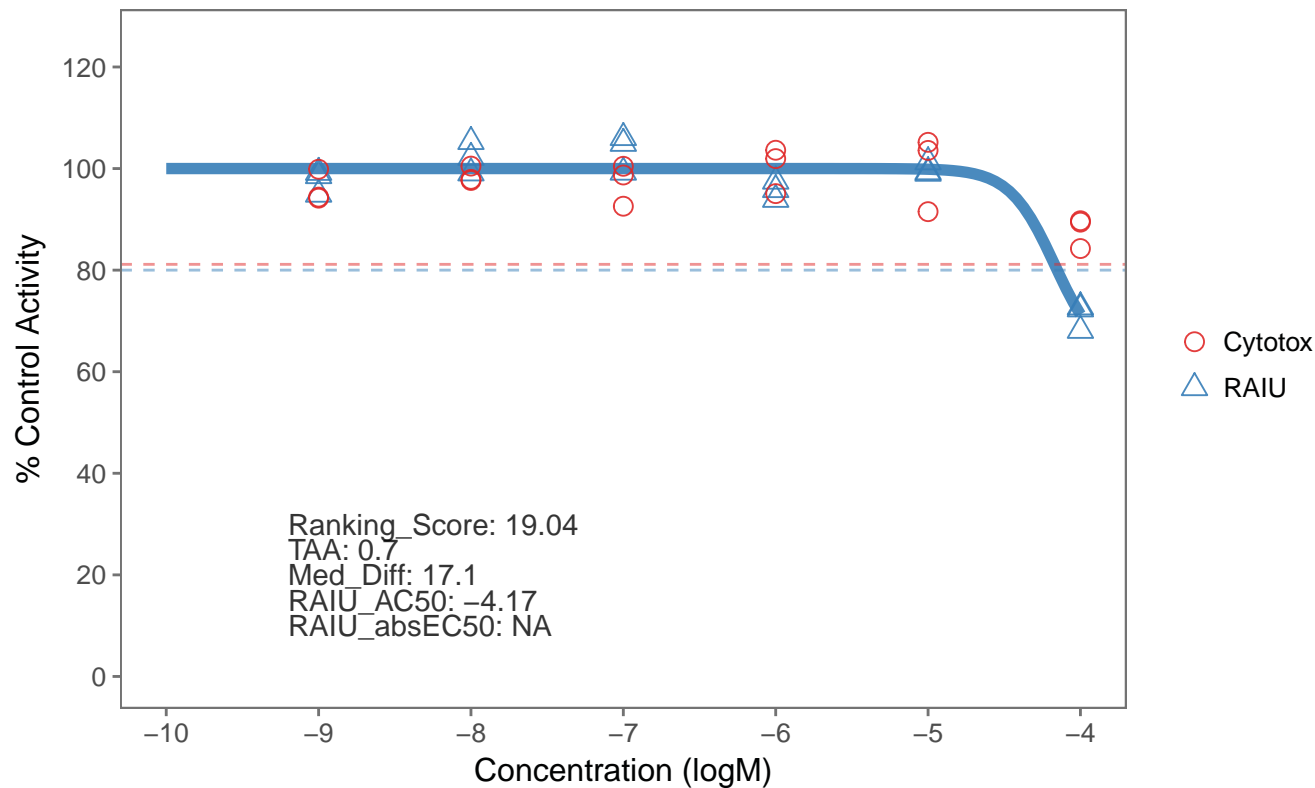

78. SPID: TP0001962E03  
NAME: 2-Phenylethyl benzoate  
CAS NO: 94-47-3

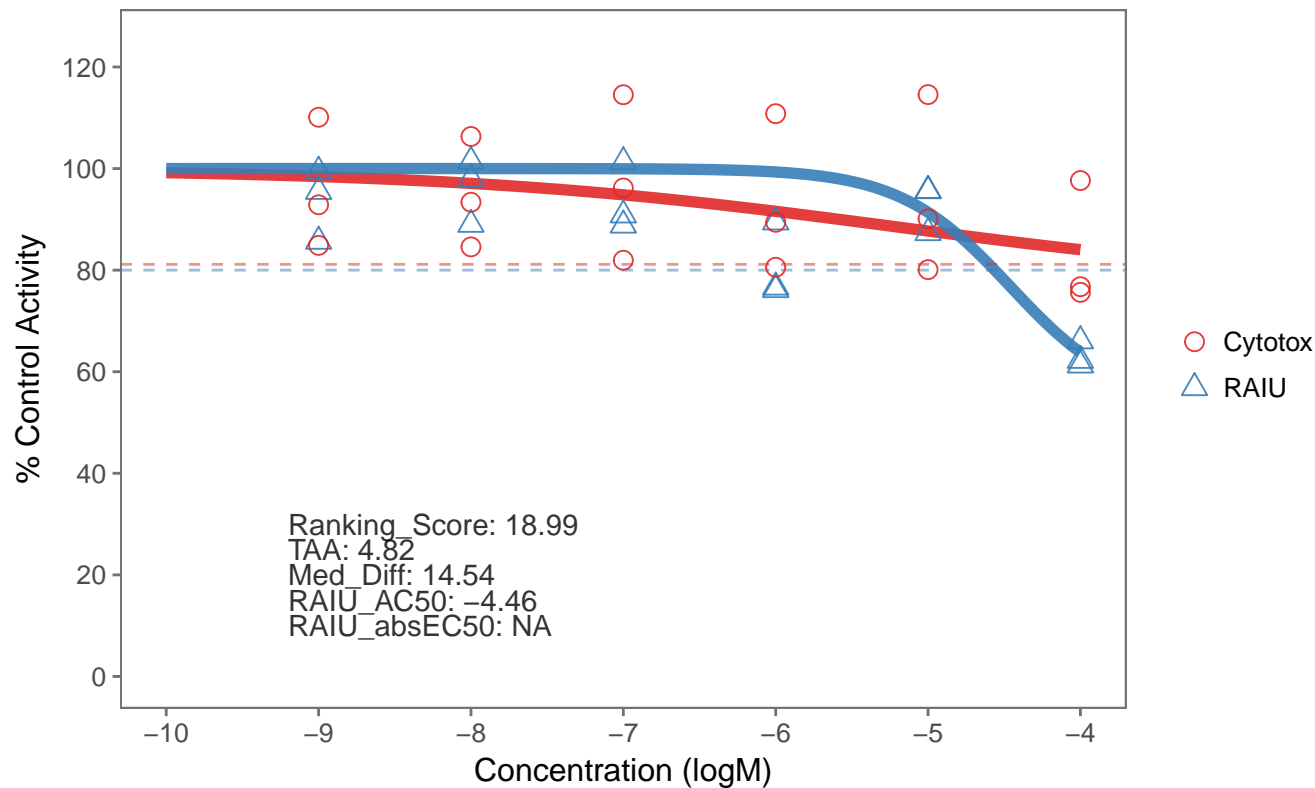

79. SPID: TP0001958G04  
NAME: (2R,6S)-Fenpropimorph  
CAS NO: 67564-91-4

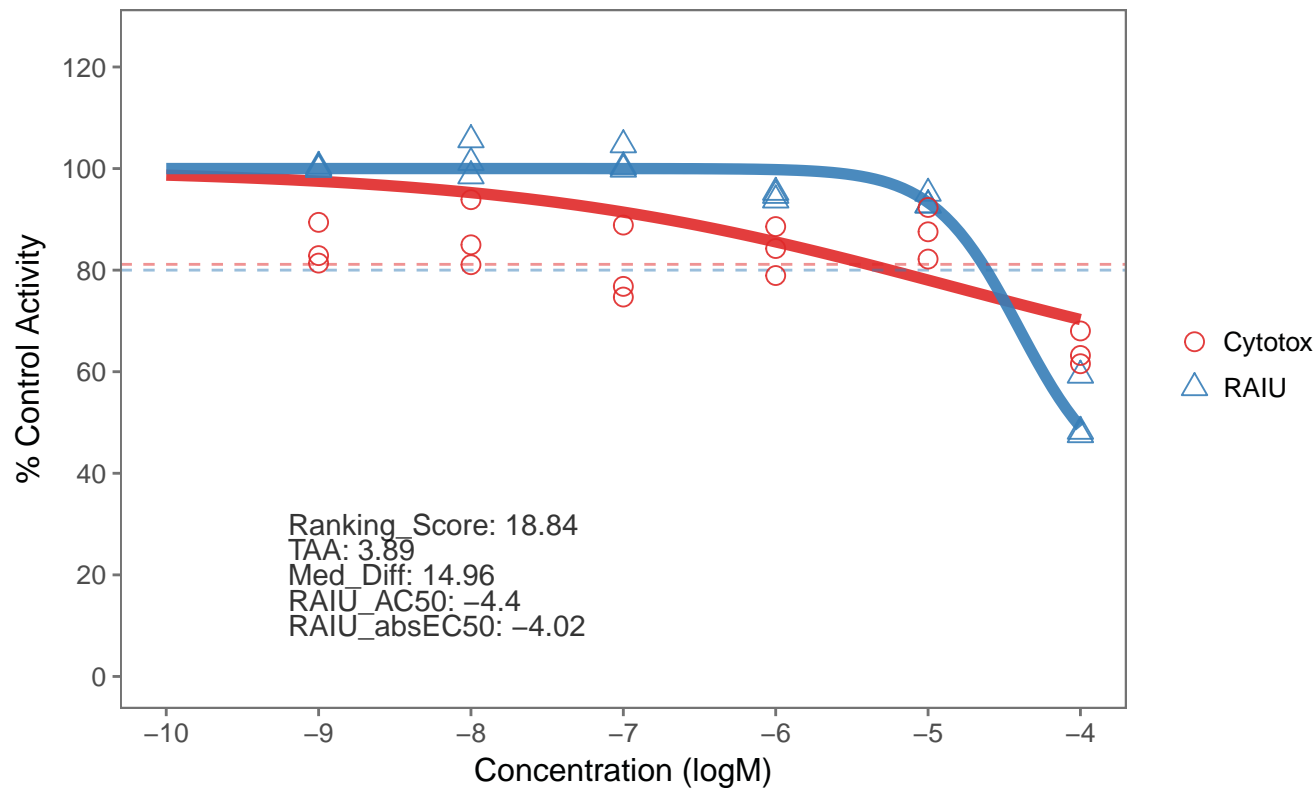

80. SPID: TP0001952E07  
NAME: Benzyl benzoate  
CAS NO: 120-51-4

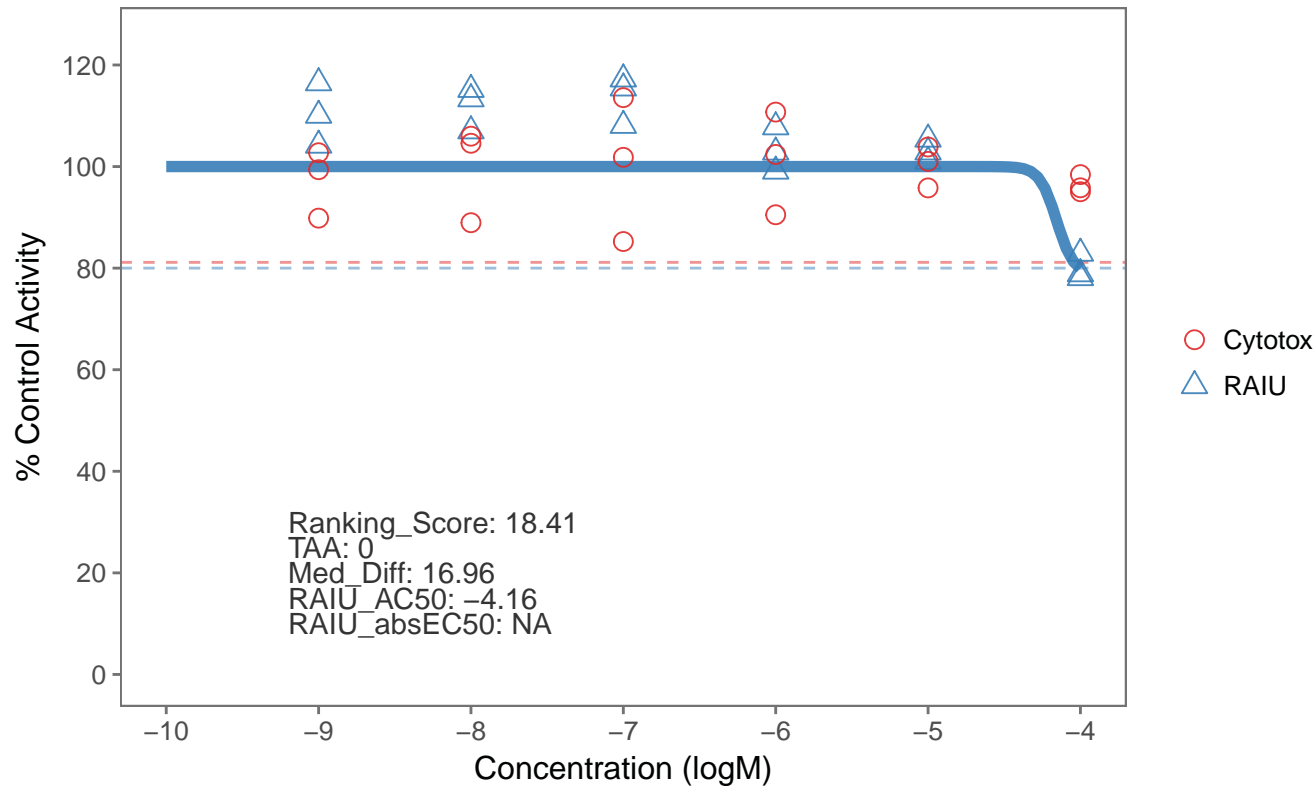



81. SPID: TP0001959G02  
NAME: Tris(methylphenyl) phosphate  
CAS NO: 1330-78-5

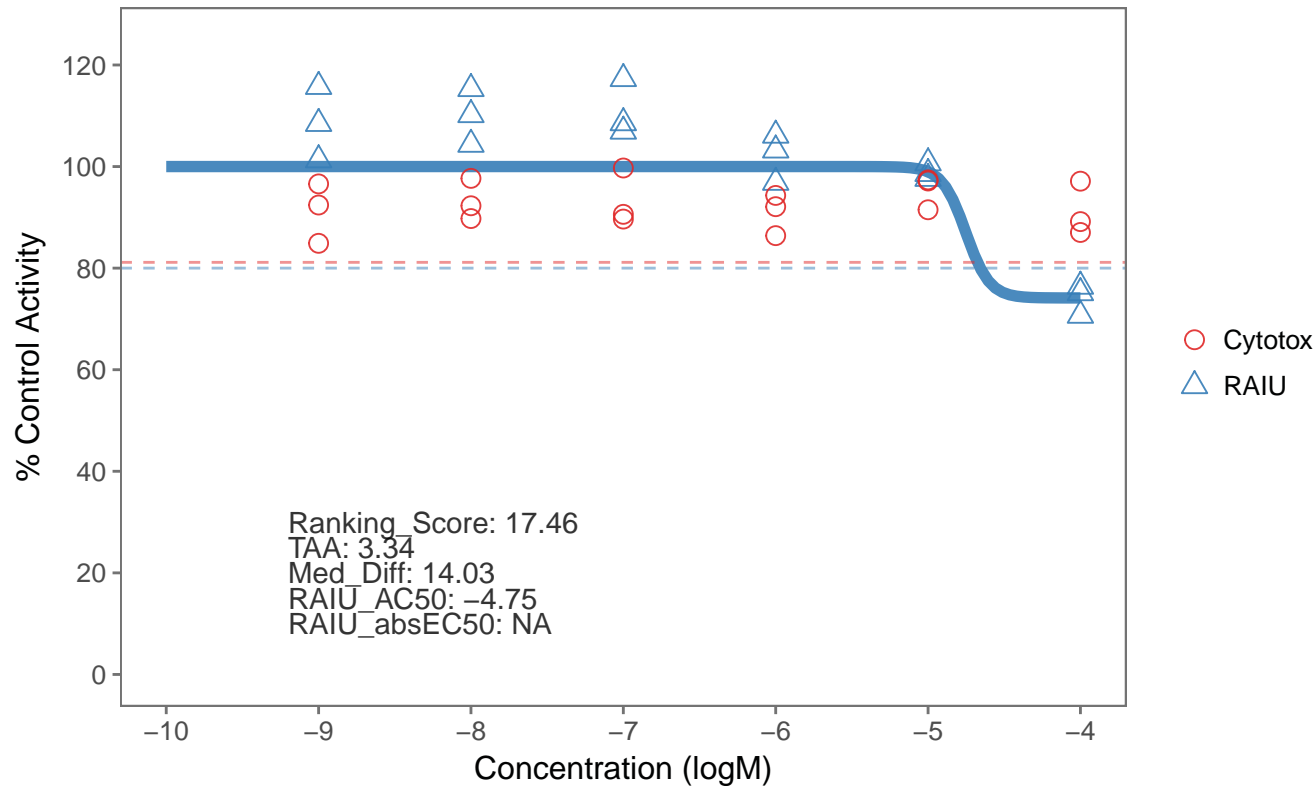

82. SPID: TP0001955G10  
NAME: 2,2'-(Tetradecylimino)diethanol  
CAS NO: 18924-66-8

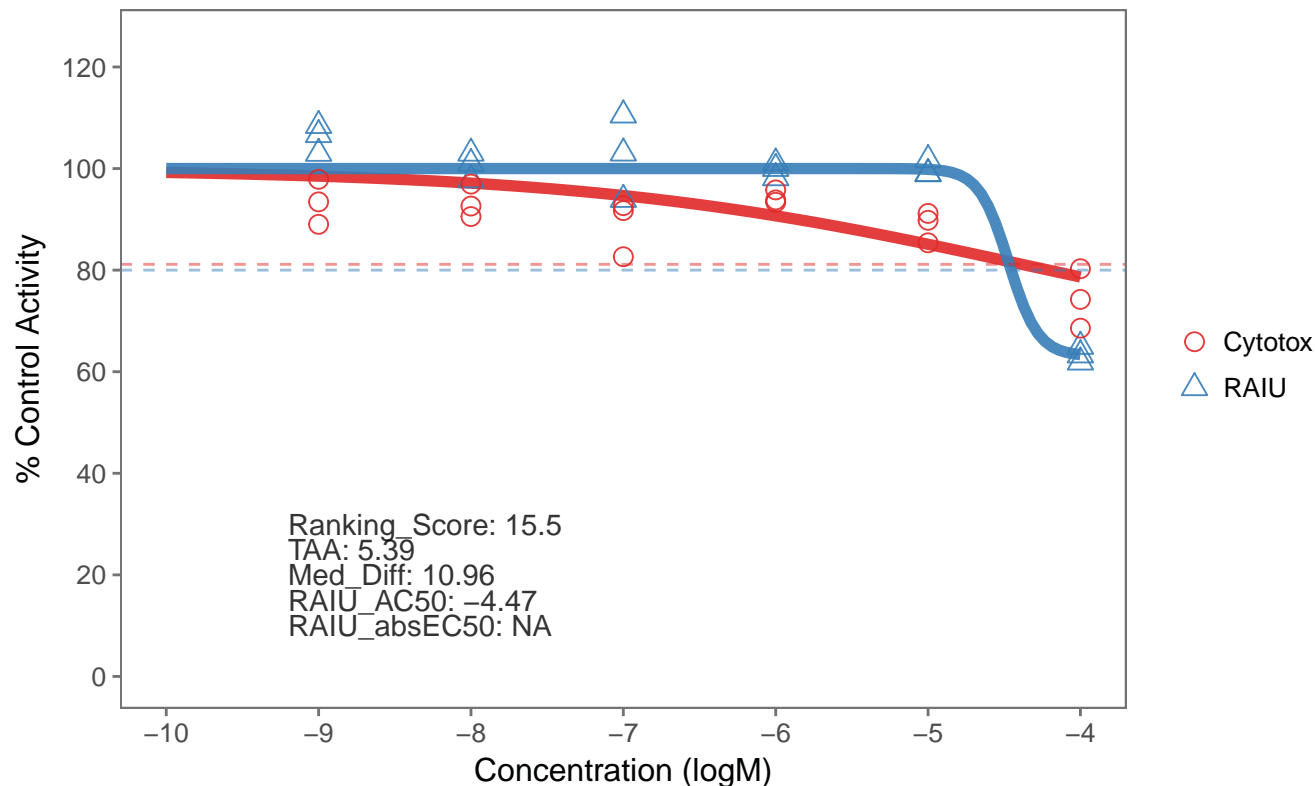

83. SPID: TP0001955E11  
NAME: Benzyl cinnamate  
CAS NO: 103-41-3

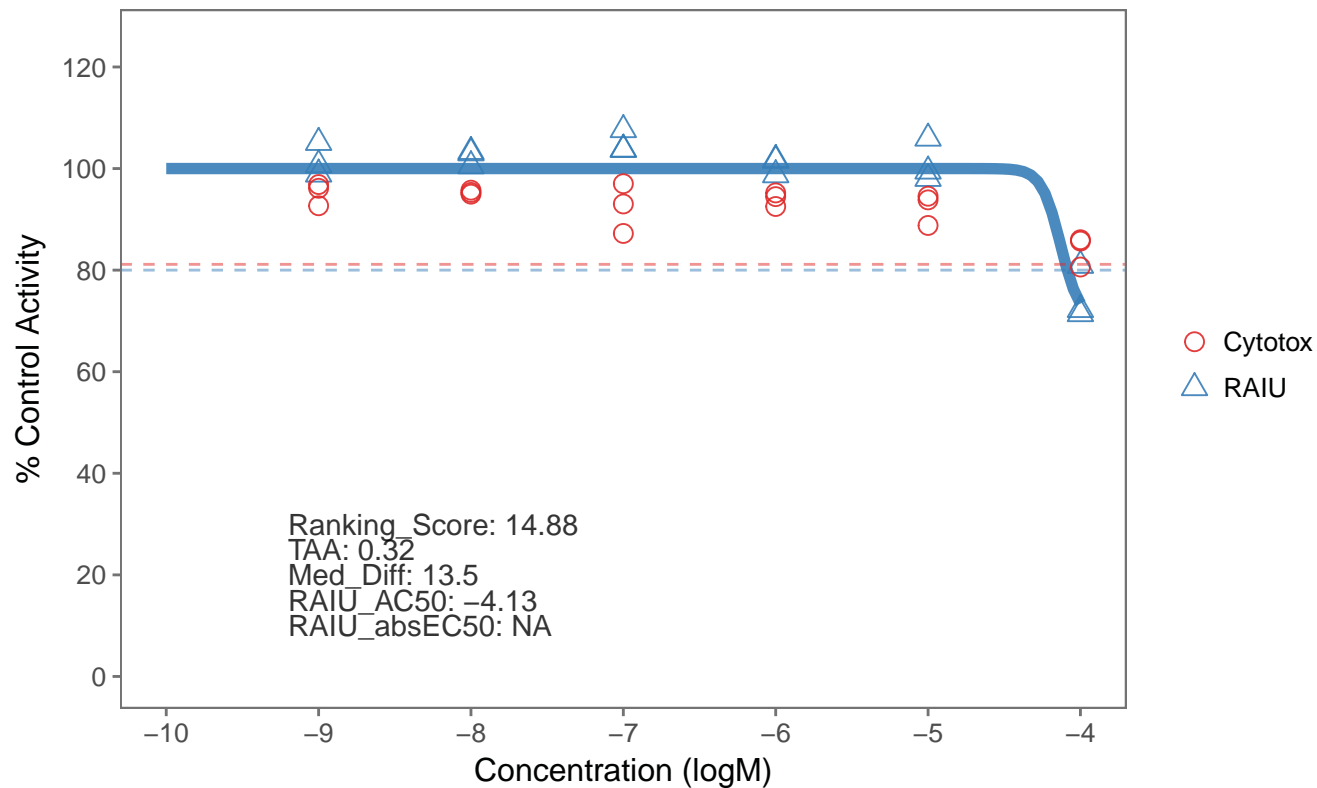

84. SPID: TP0001954D09  
NAME: N-Nitrosopyrrolidine  
CAS NO: 930-55-2

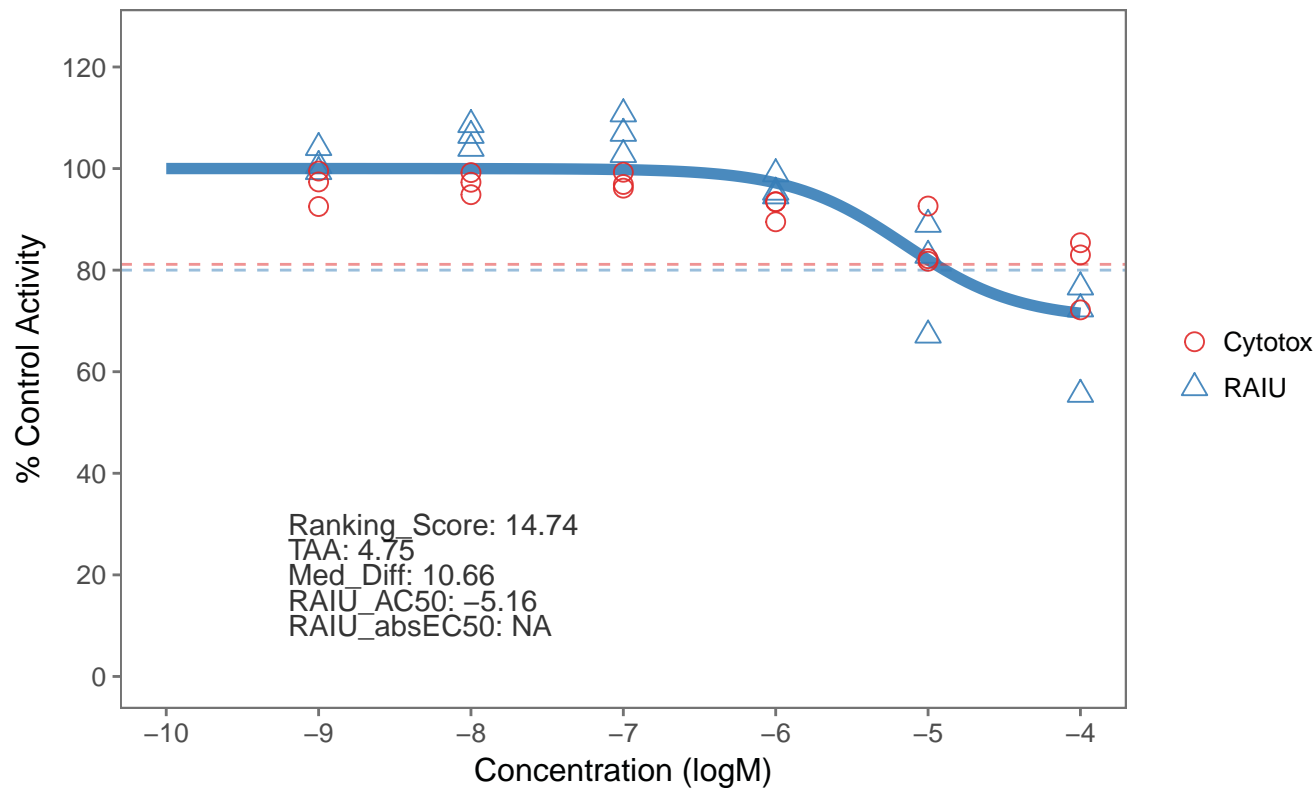

85. SPID: TP0001952E11  
NAME: Sodium 2-phenylphenate tetrahydrate  
CAS NO: 6152-33-6

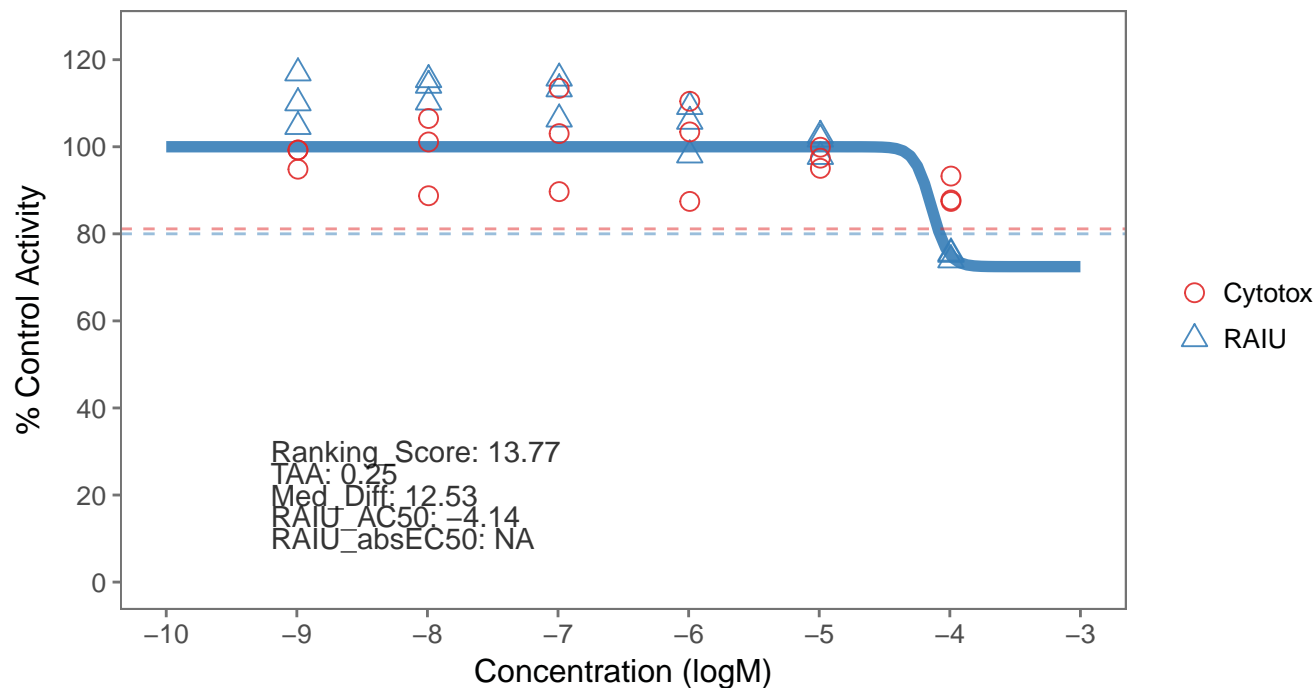

86. SPID: TP0001958F03  
NAME: Hexyl salicylate  
CAS NO: 6259-76-3

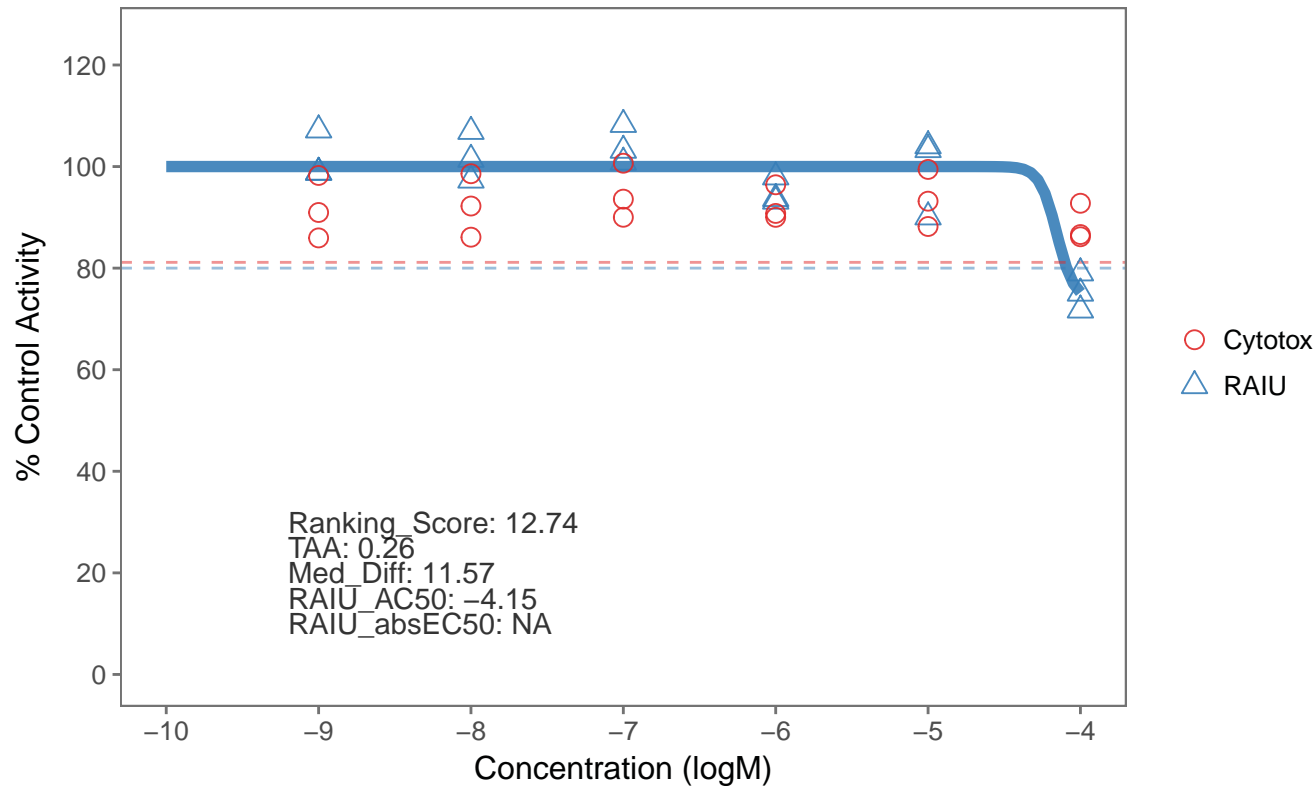

87. SPID: TP0001961G01  
NAME: 2-(3-Phenylpropyl)pyridine  
CAS NO: 2110-18-1

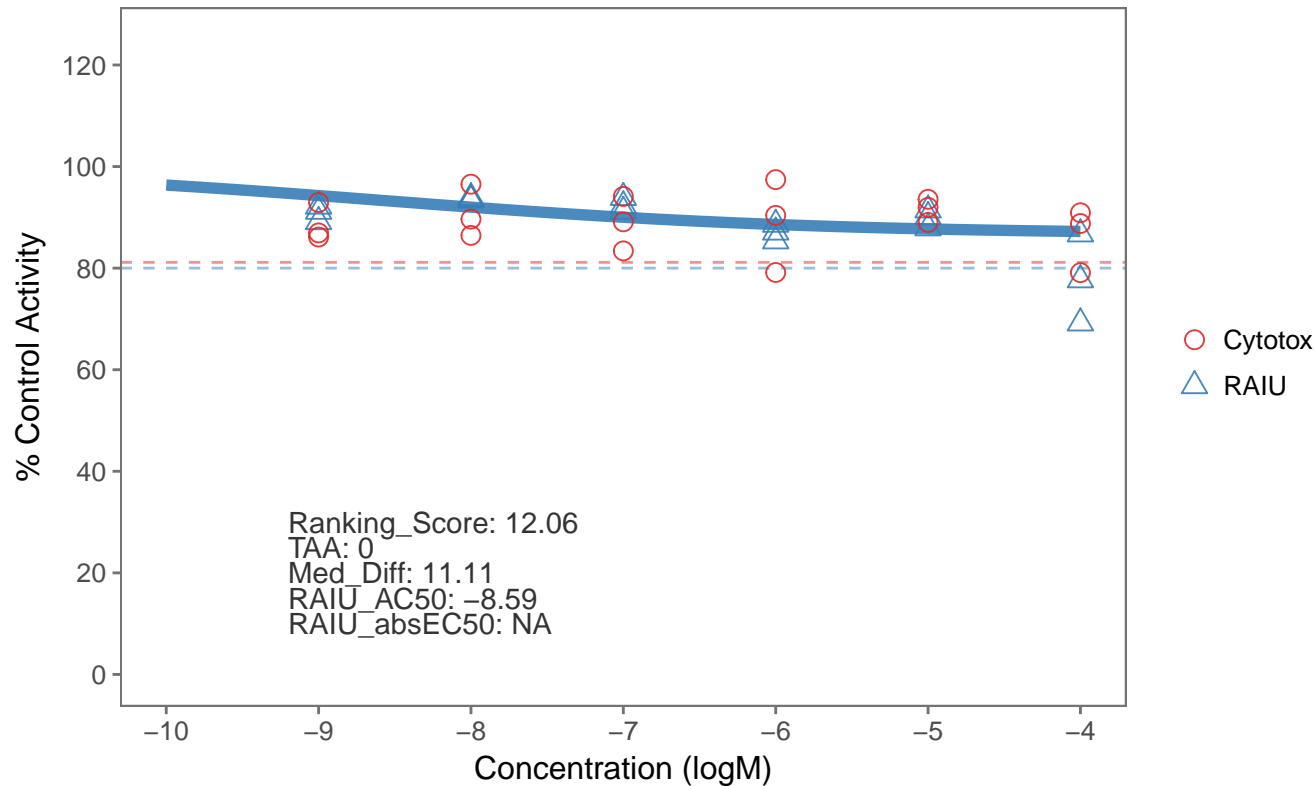

88. SPID: TP0001963C04  
NAME: Sodium octyl sulfate  
CAS NO: 142-31-4

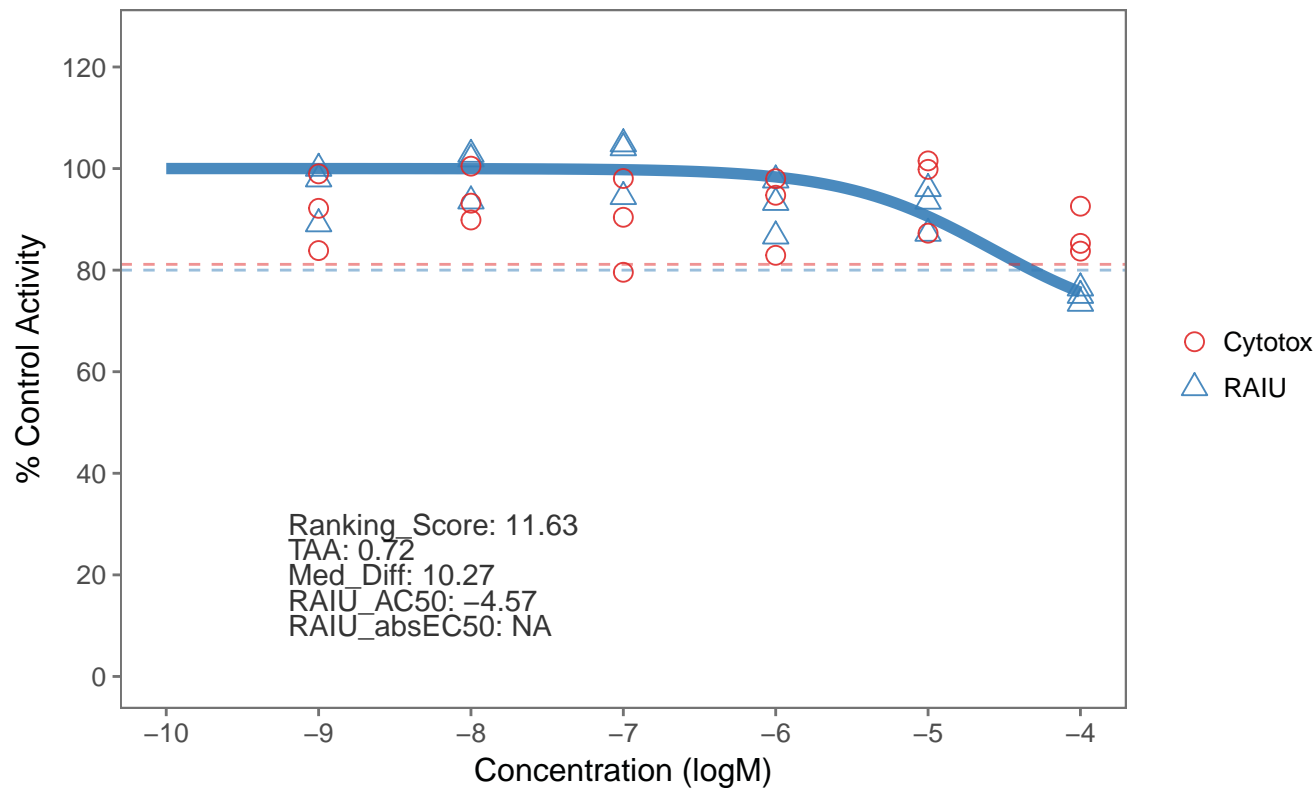



89. SPID: TP0001962A01  
NAME: Hydroxyprogesterone caproate  
CAS NO: 630-56-8

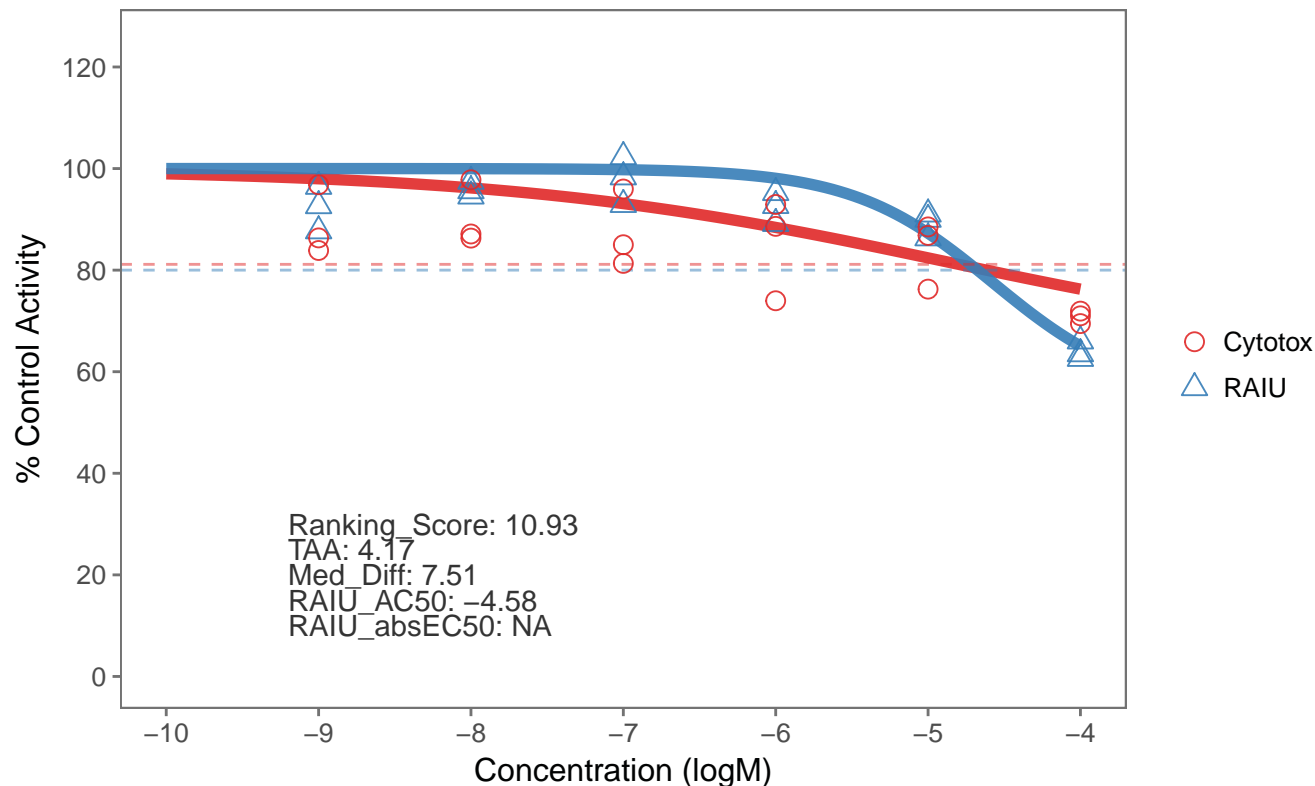

90. SPID: TP0001952C09  
NAME: Nordihydroguaiaretic acid  
CAS NO: 500-38-9

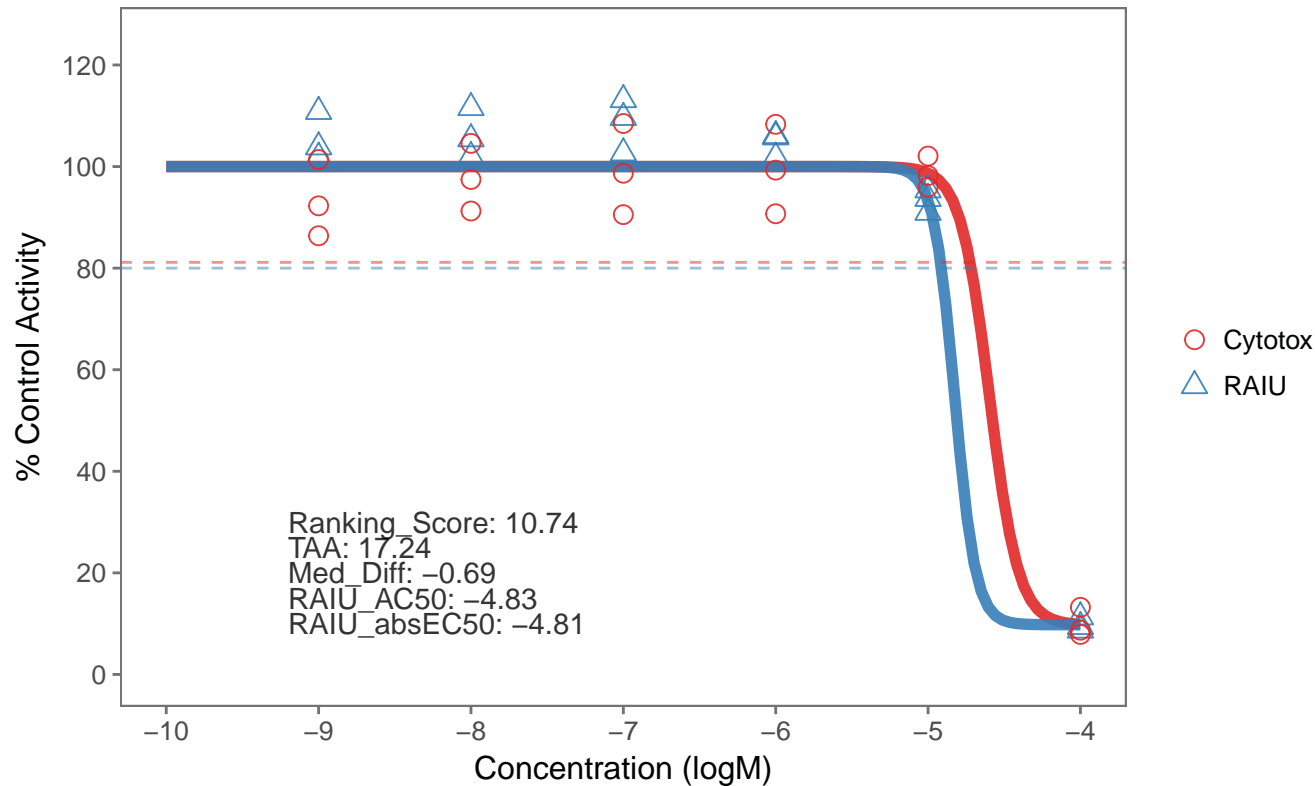

91. SPID: TP0001958D03

NAME: Mancozeb

CAS NO: 8018-01-7

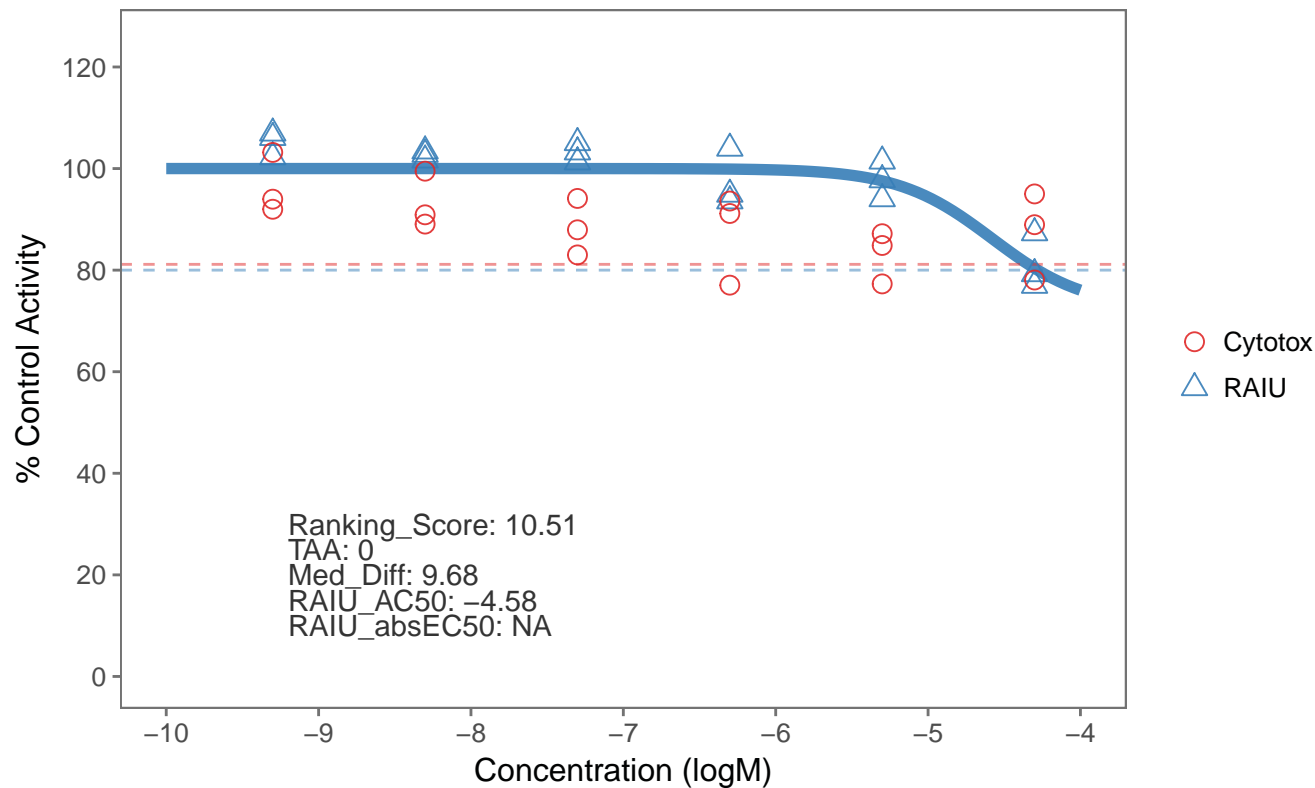

92. SPID: TP0001964E10  
NAME: 1,2-Dibromo-2,4-dicyanobutane  
CAS NO: 35691-65-7

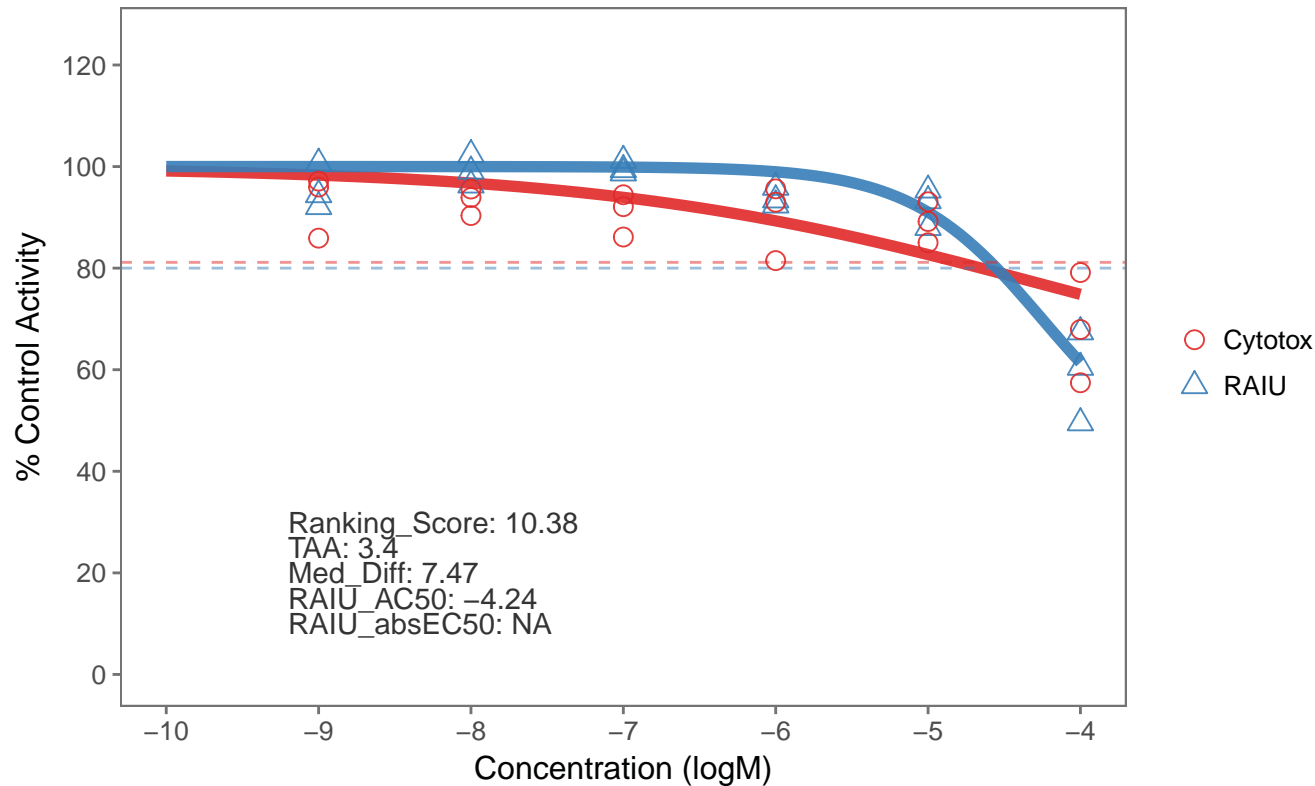

93. SPID: TP0001956E10  
NAME: Bisphenol A diglycidyl ether  
CAS NO: 1675-54-3

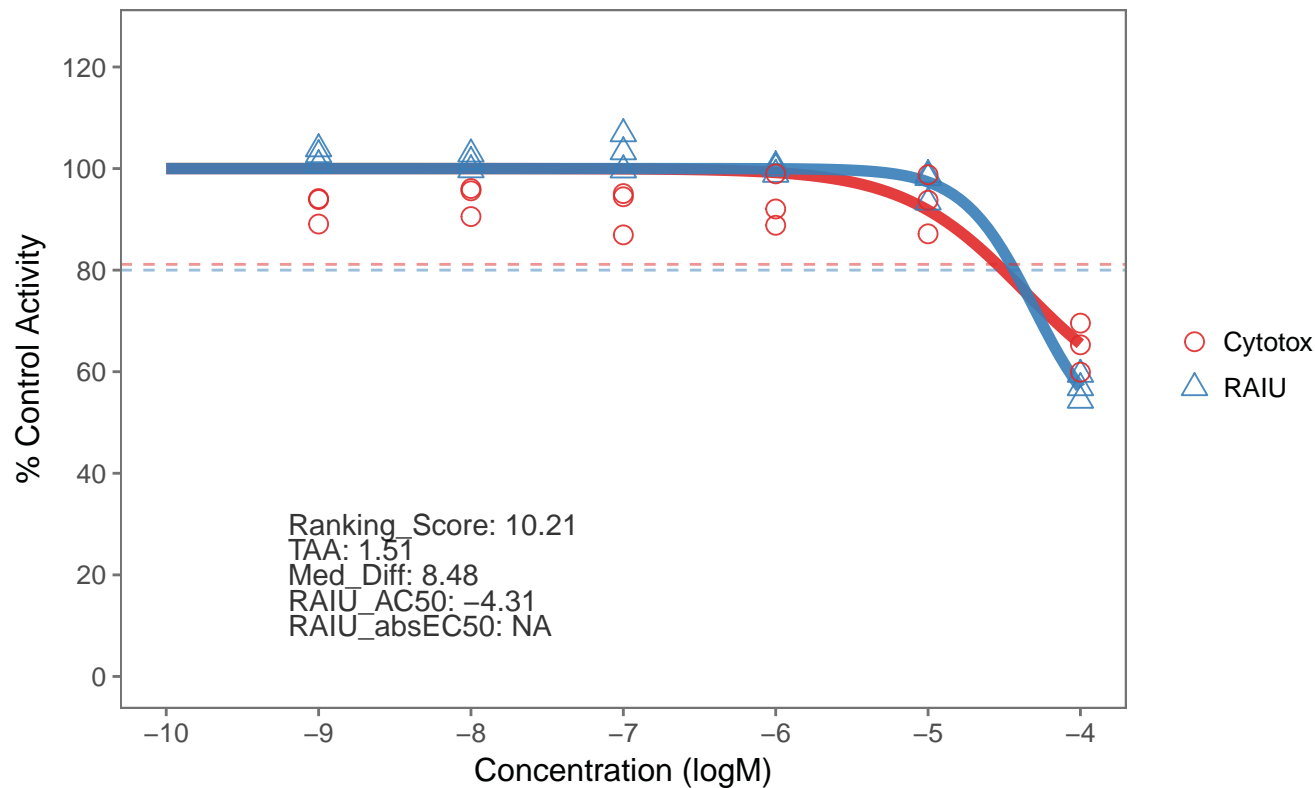

94. SPID: TP0001960C03  
NAME: Calcium dodecylbenzene sulfonate  
CAS NO: 26264-06-2

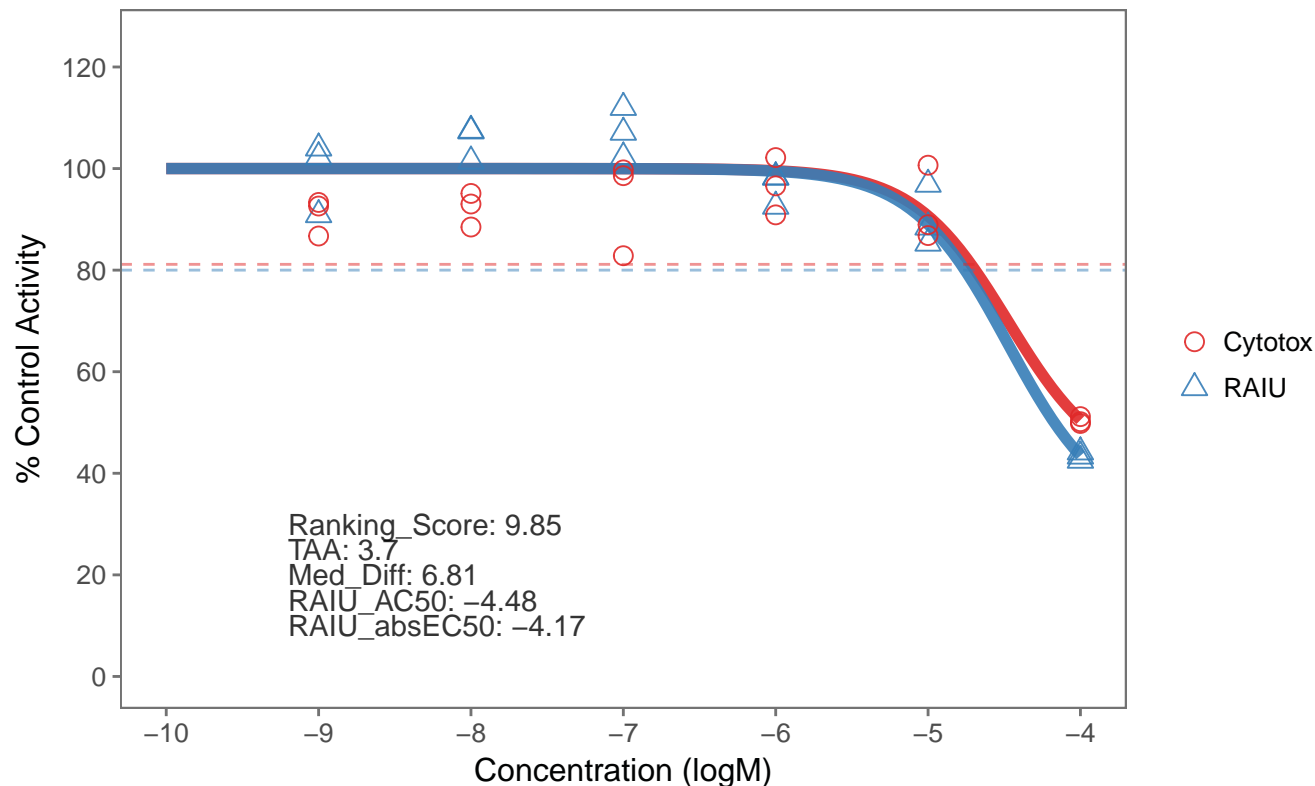

95. SPID: TP0001961B09  
NAME: N,N'-Disalicylidene-1,2-diaminopropane  
CAS NO: 94-91-7

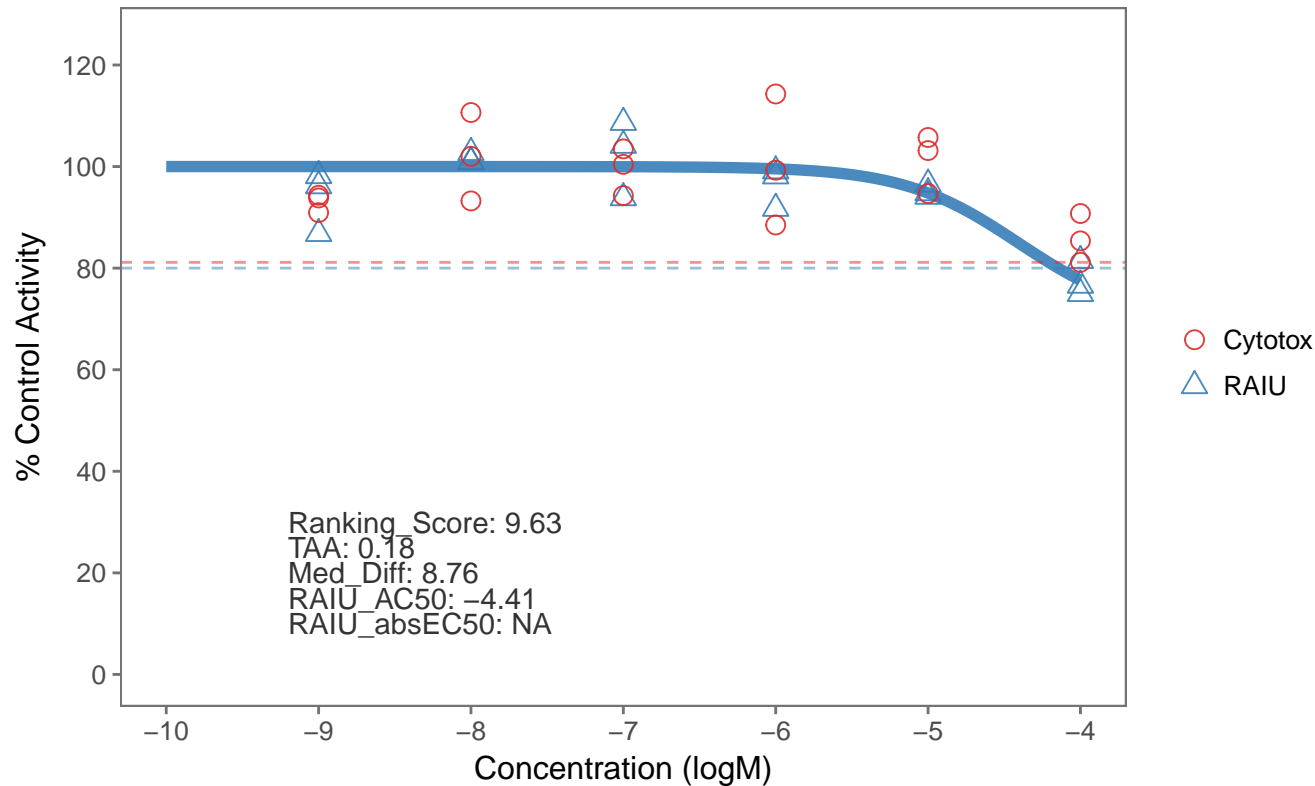

96. SPID: TP0001961D03

NAME: Metconazole

CAS NO: 125116-23-6

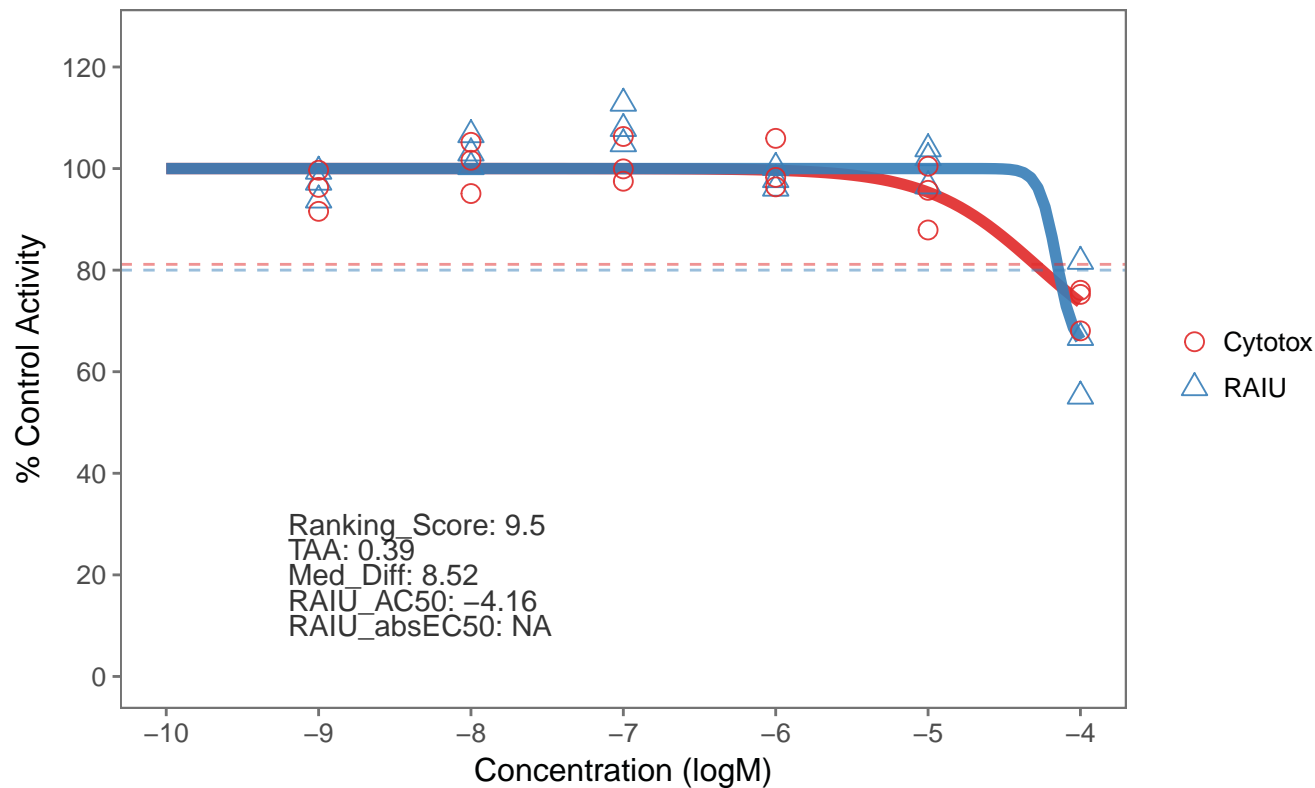



97. SPID: TP0001964D05  
NAME: 7-Acetyl-1,1,3,4,4,6-hexamethyltetraline  
CAS NO: 21145-77-7

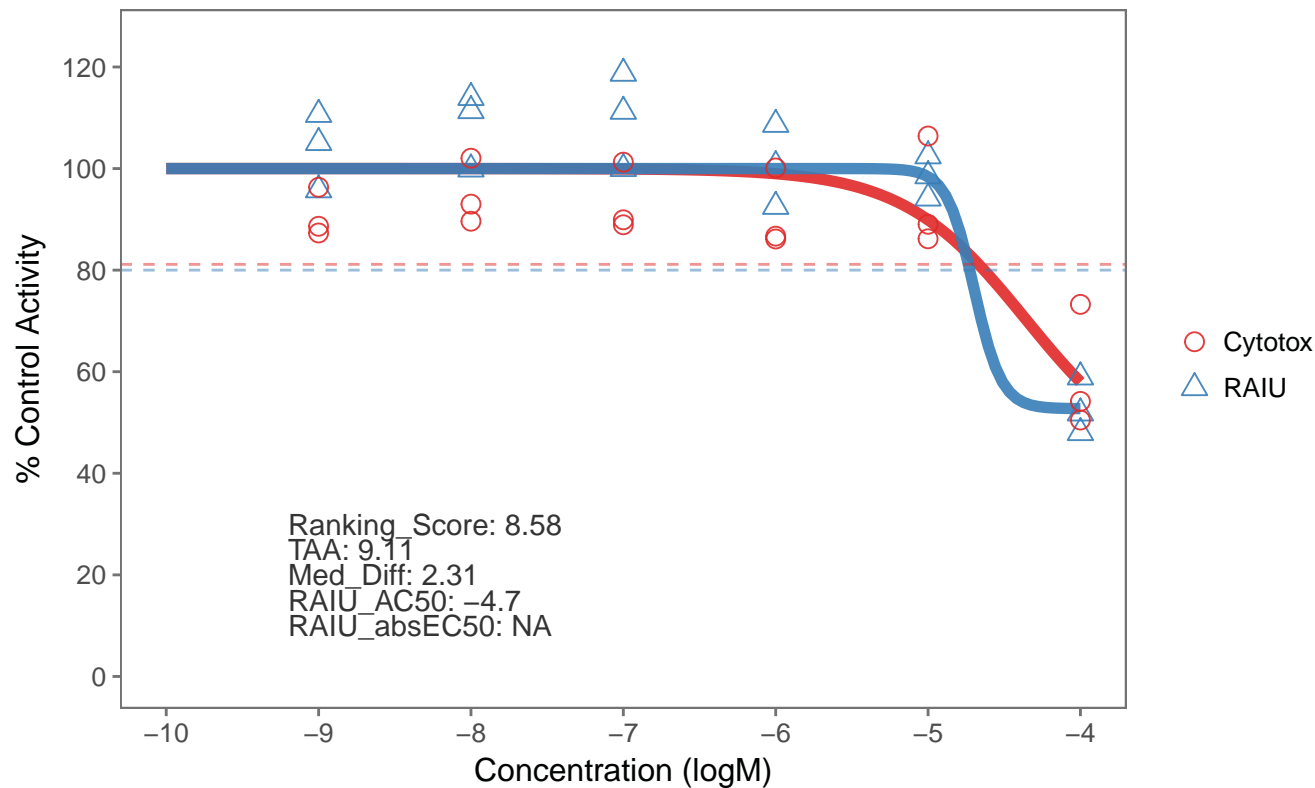

98. SPID: TP0001958B03

NAME: Ipconazole

CAS NO: 125225-28-7

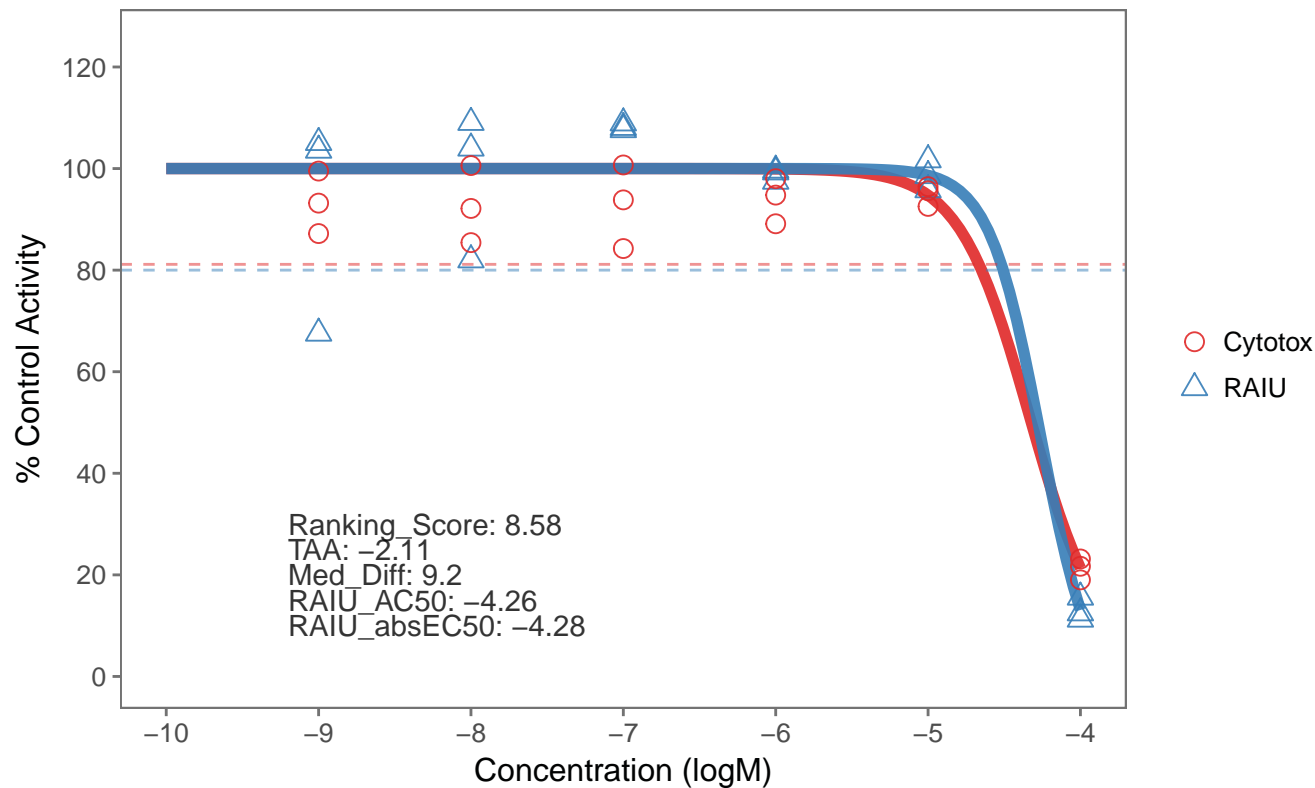

99. SPID: TP0001957B08

NAME: ..-Cyhalothrin

CAS NO: 91465-08-6

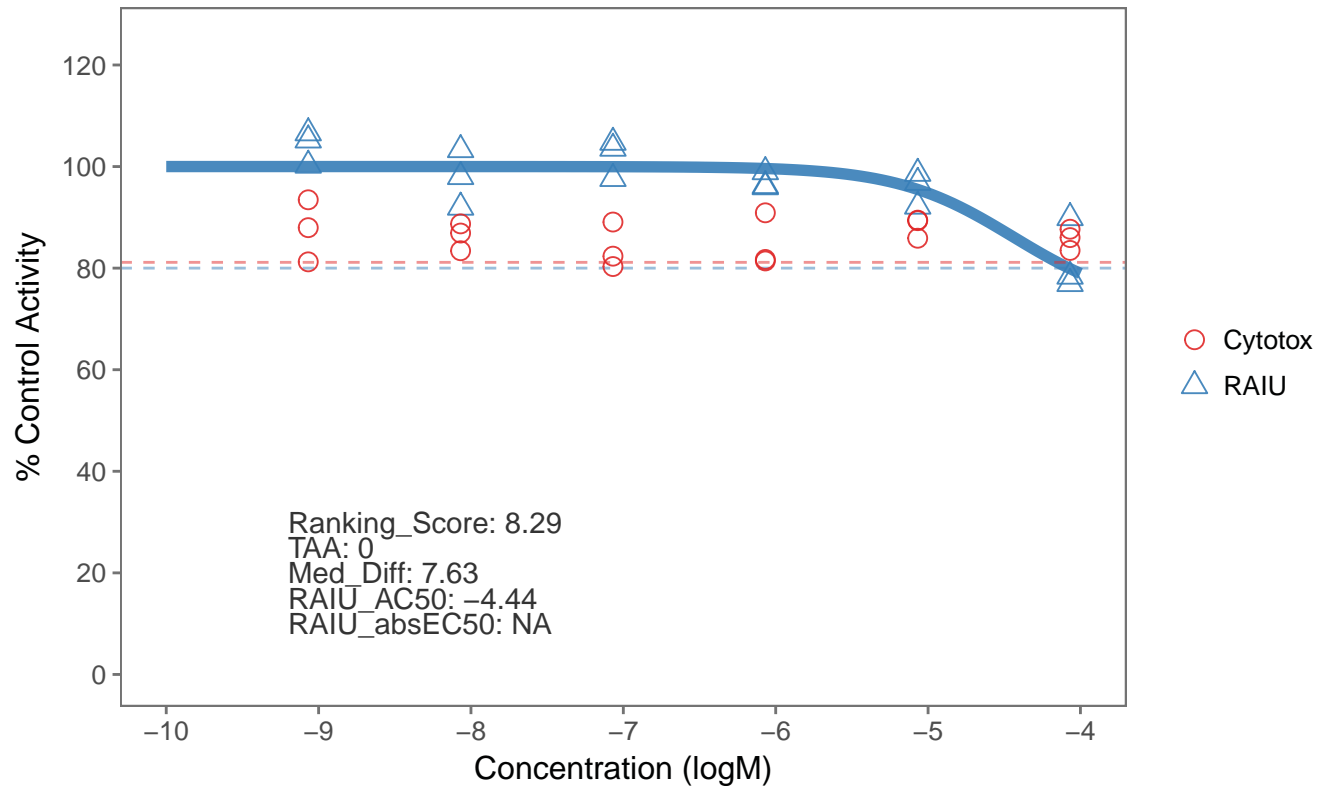

100. SPID: TP0001962F02  
NAME: Melengestrol acetate  
CAS NO: 2919-66-6

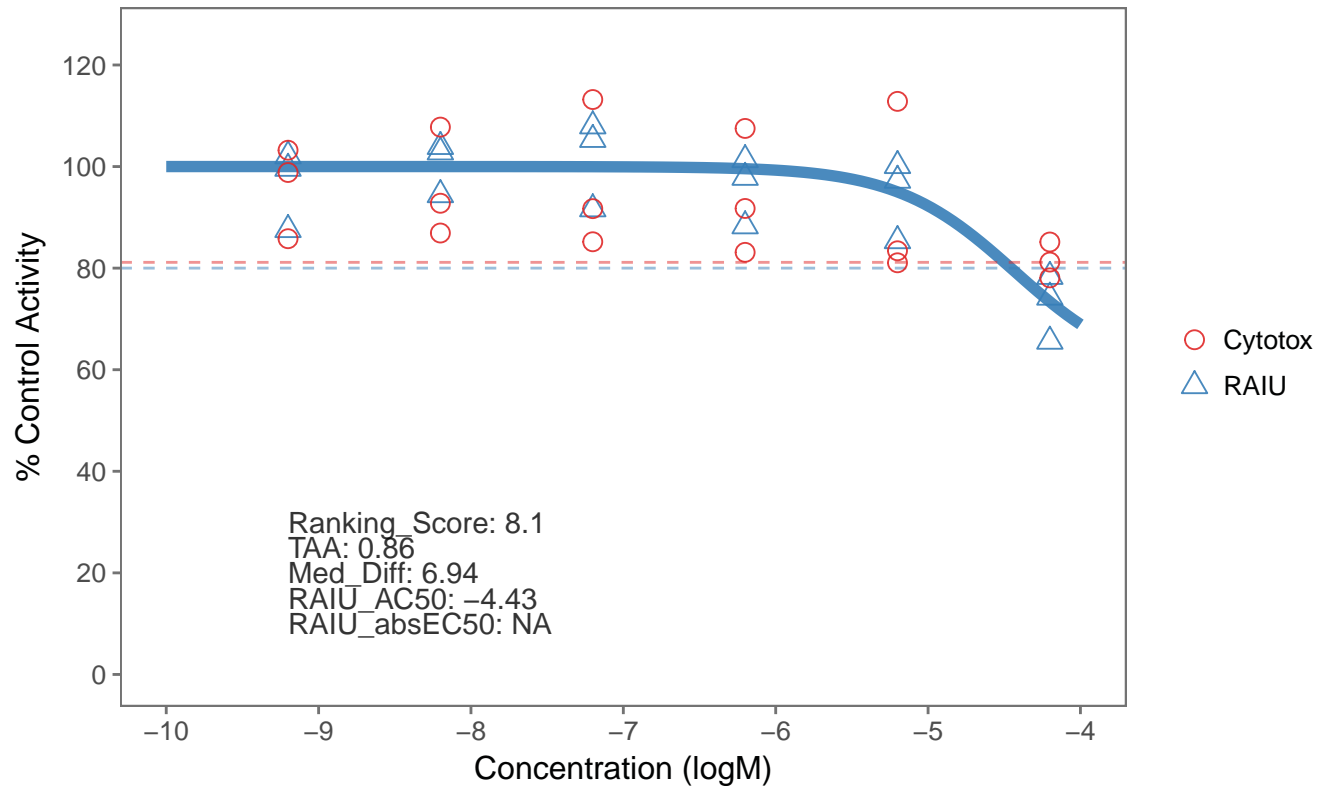

101. SPID: TP0001955G02  
NAME: Laurocapram  
CAS NO: 59227-89-3

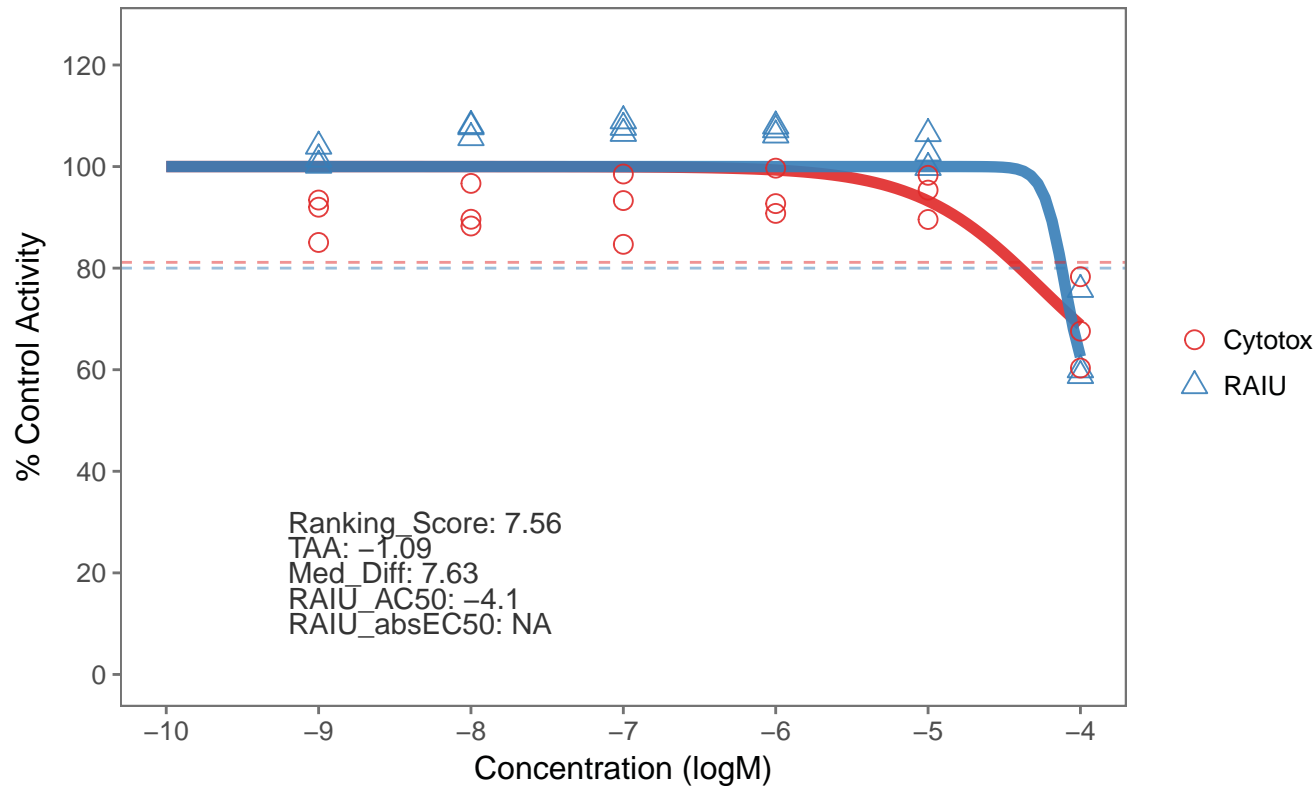

102. SPID: TP0001959B02

NAME: Benzylparaben

CAS NO: 94-18-8

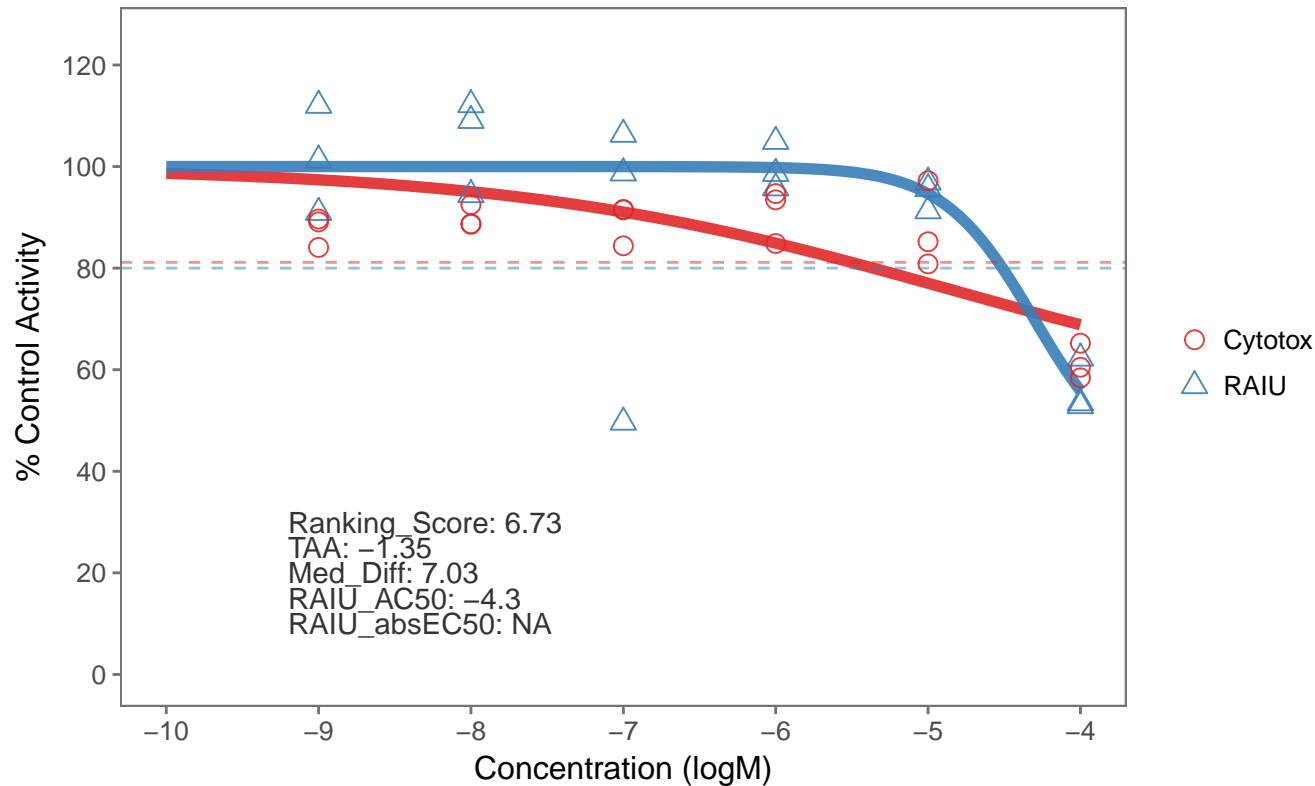

103. SPID: TP0001952G04

NAME: Dichlone

CAS NO: 117-80-6

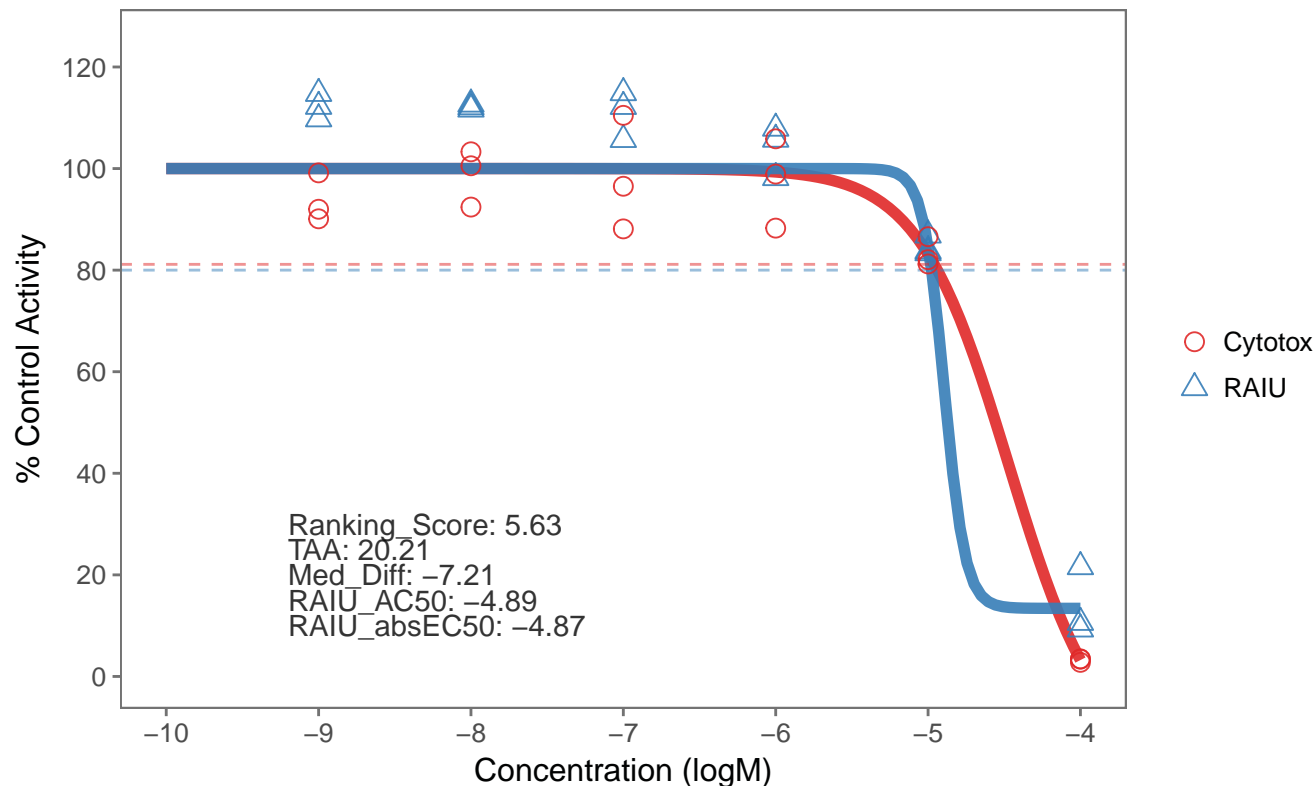

104. SPID: TP0001959E04

NAME: Flavone

CAS NO: 525-82-6

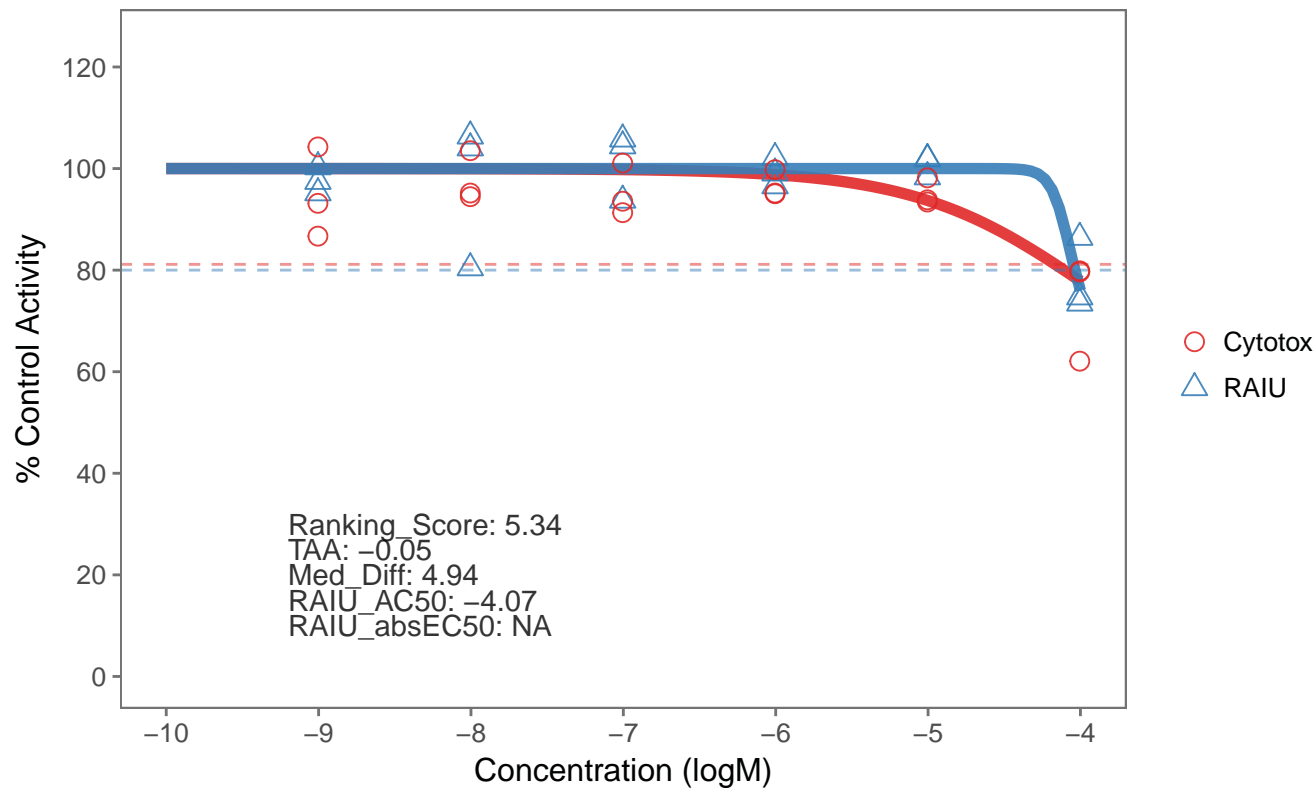



105. SPID: TP0001955E03

NAME: Acid Orange 156

CAS NO: 68555-86-2

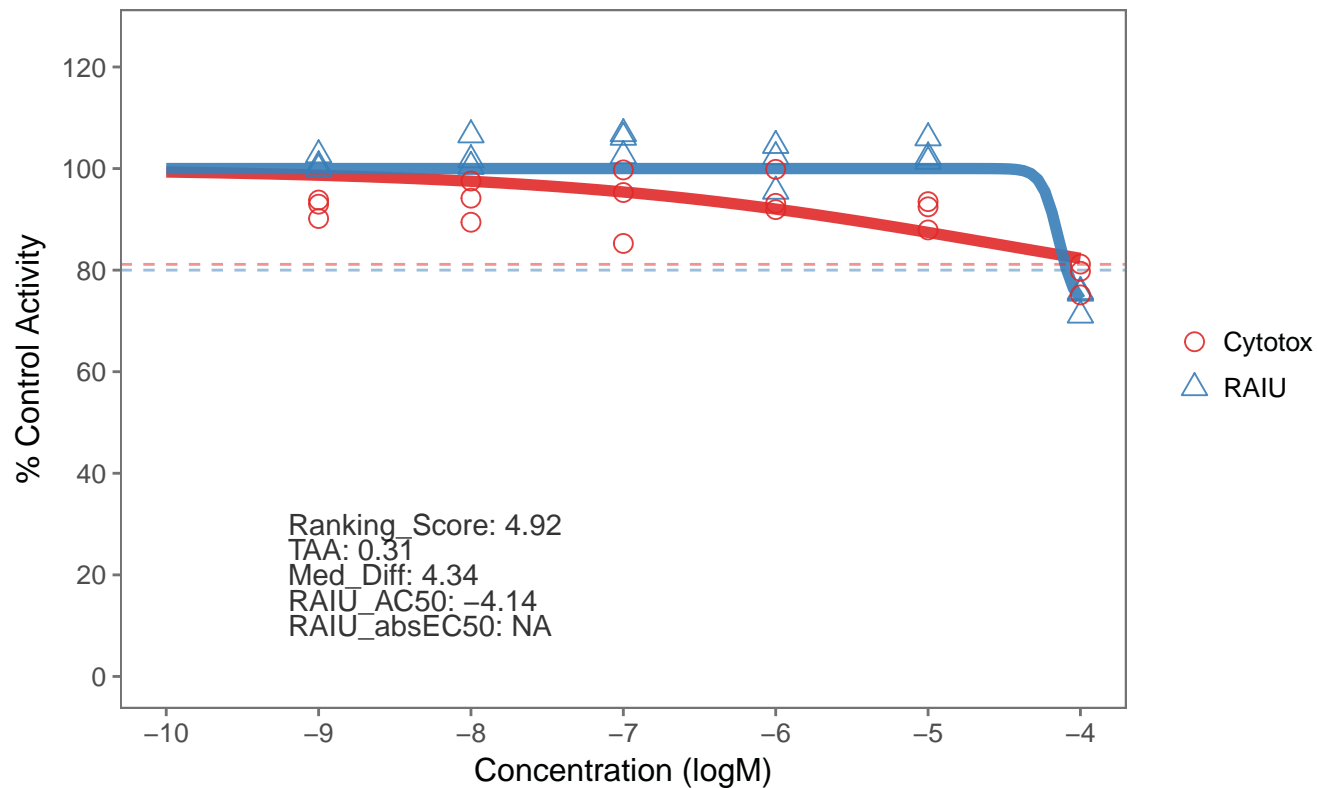

106. SPID: TP0001953F09

NAME: Levomenol

CAS NO: 23089-26-1

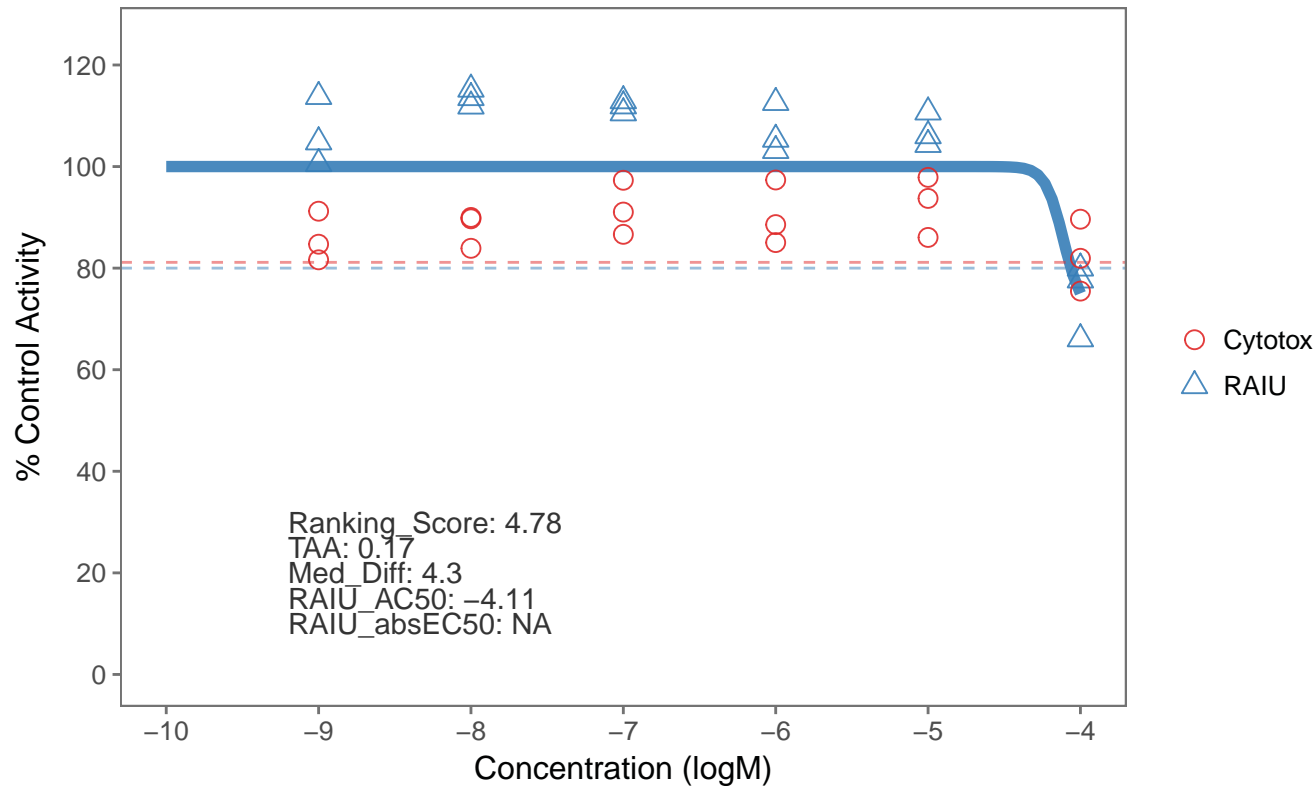

107. SPID: TP0001964G04

NAME: Mancozeb

CAS NO: 8018-01-7

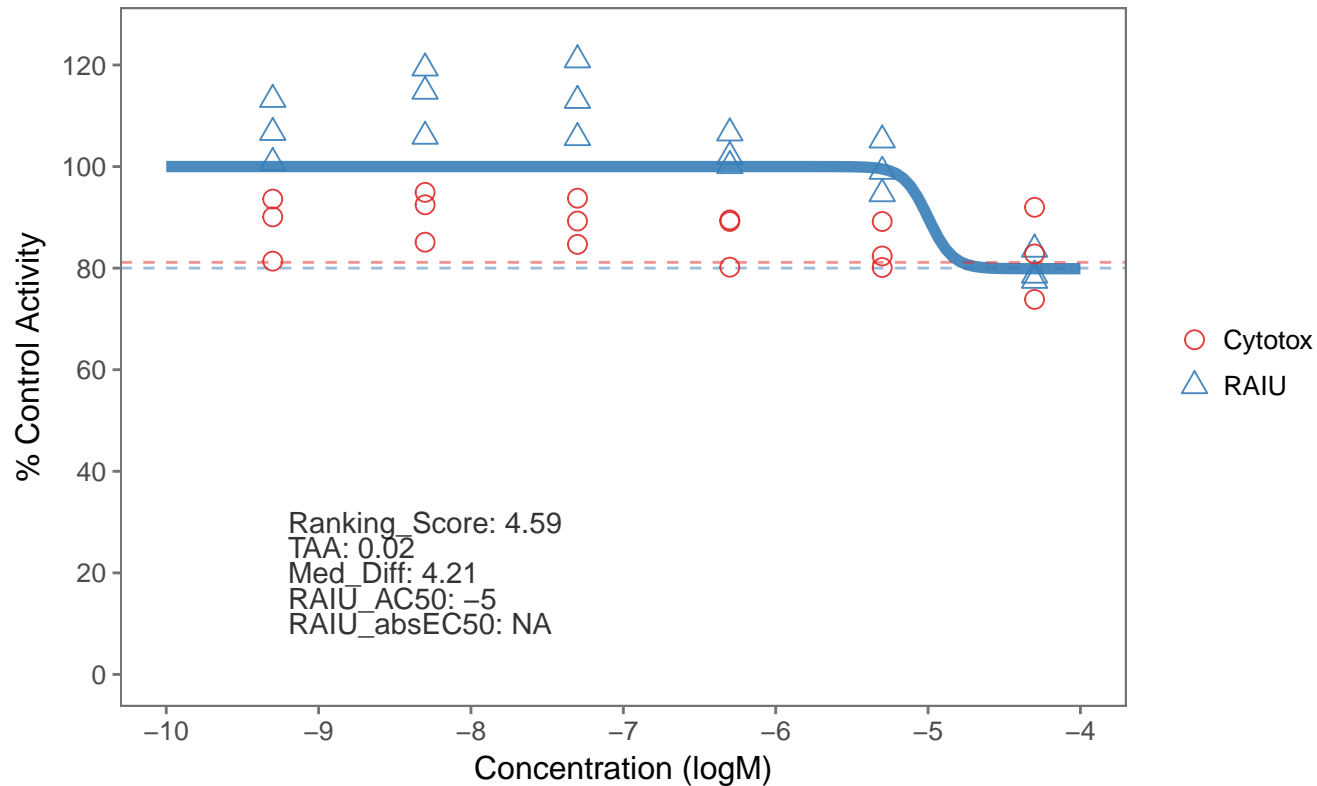

108. SPID: TP0001964E11

NAME: Bicalutamide

CAS NO: 90357-06-5

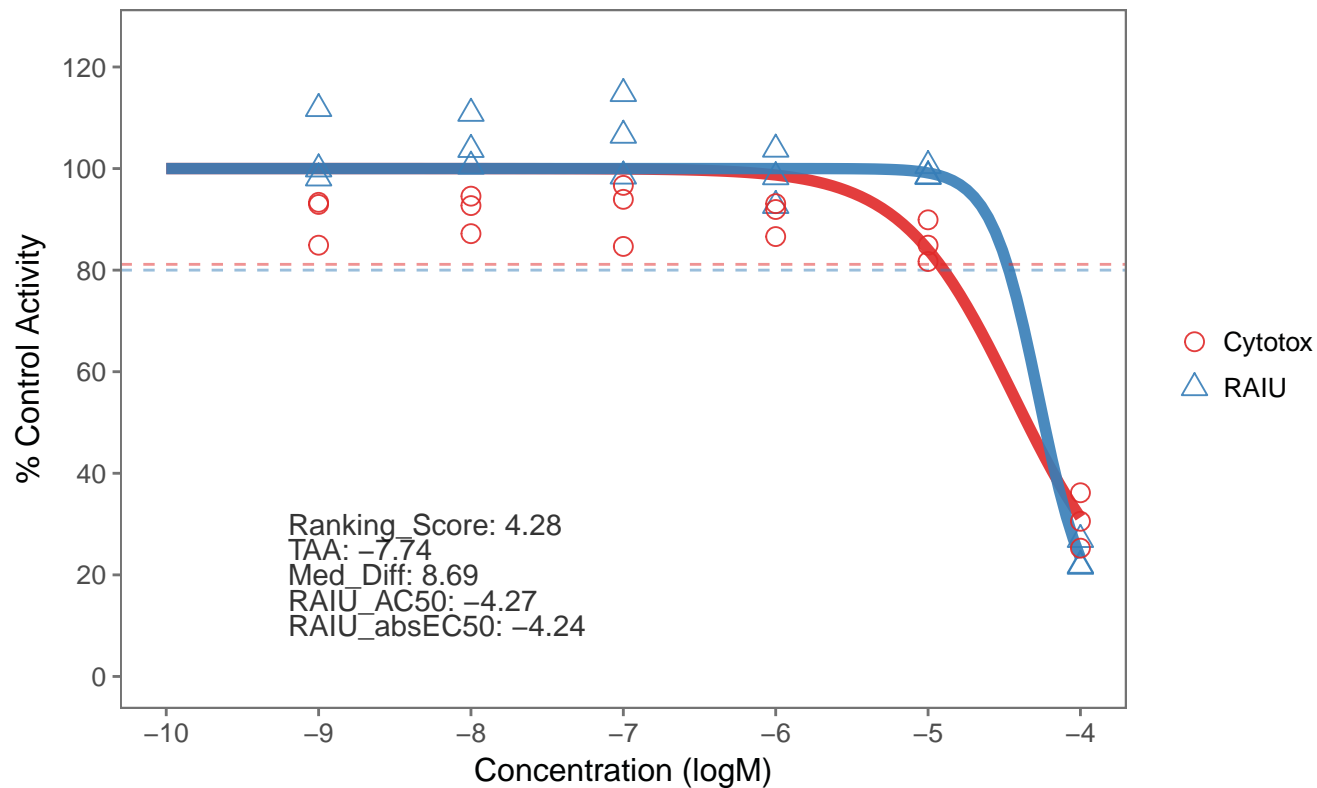

109. SPID: TP0001959F08

NAME: Mepronil

CAS NO: 55814-41-0

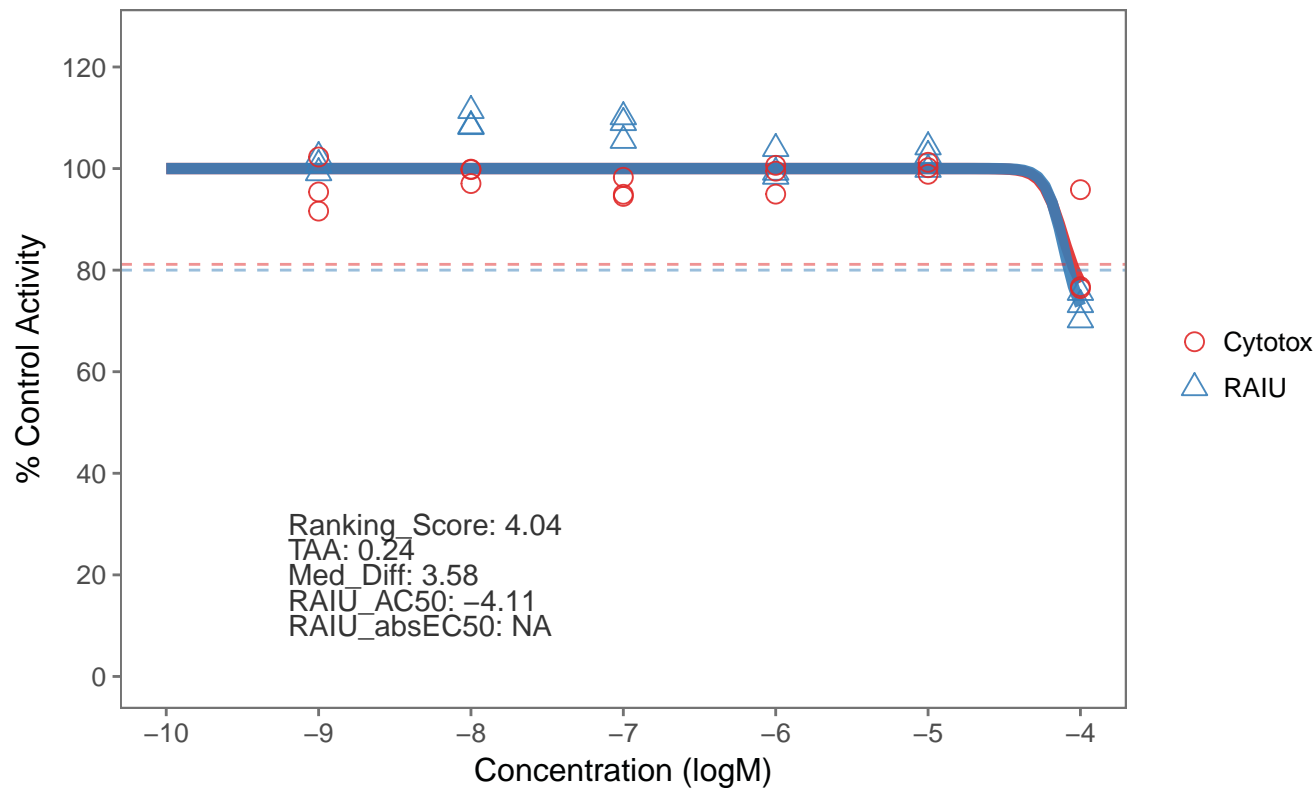

110. SPID: TP0001958B11  
NAME: Sodium tridecyl sulfate  
CAS NO: 3026-63-9

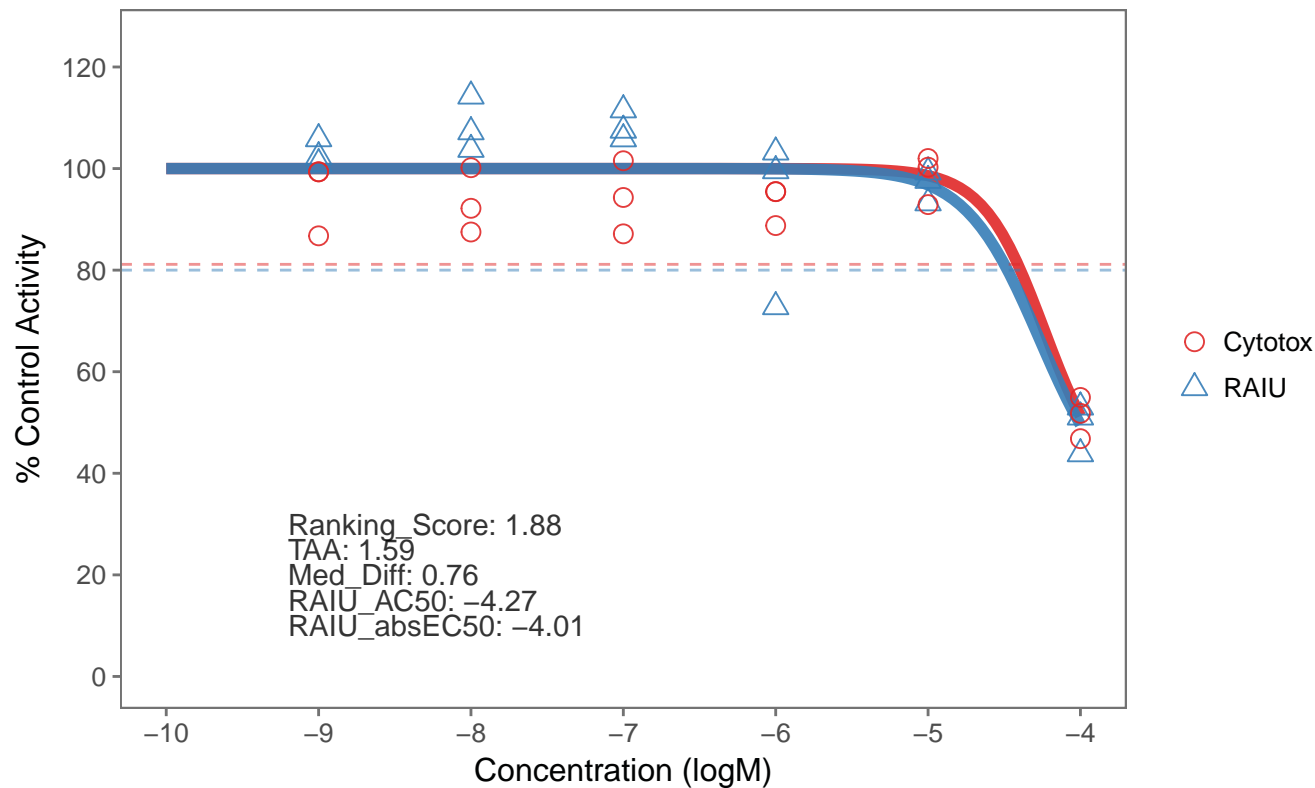

111. SPID: TP0001962E09  
NAME: 2,2',6,6'-Tetrachlorobisphenol A  
CAS NO: 79-95-8

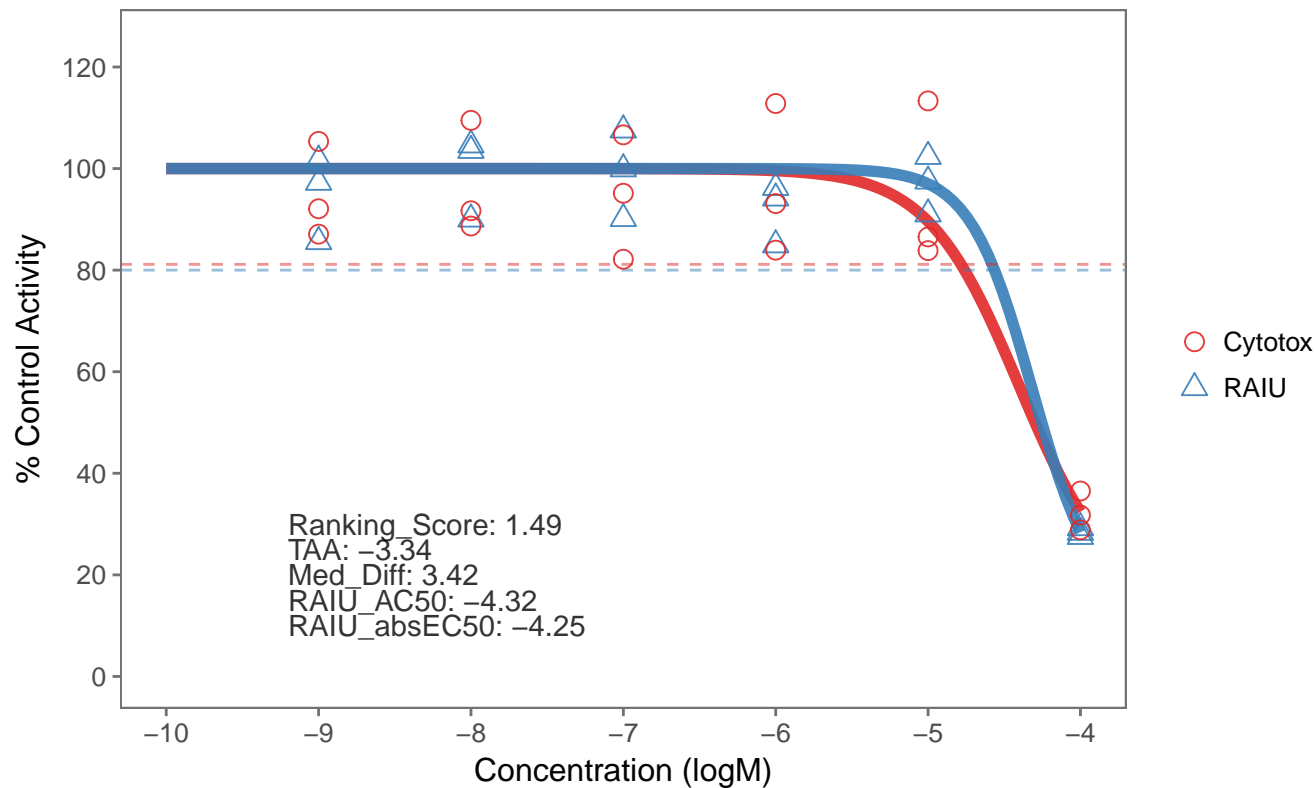

112. SPID: TP0001964D10

NAME: Triallyl trimellitate

CAS NO: 2694-54-4

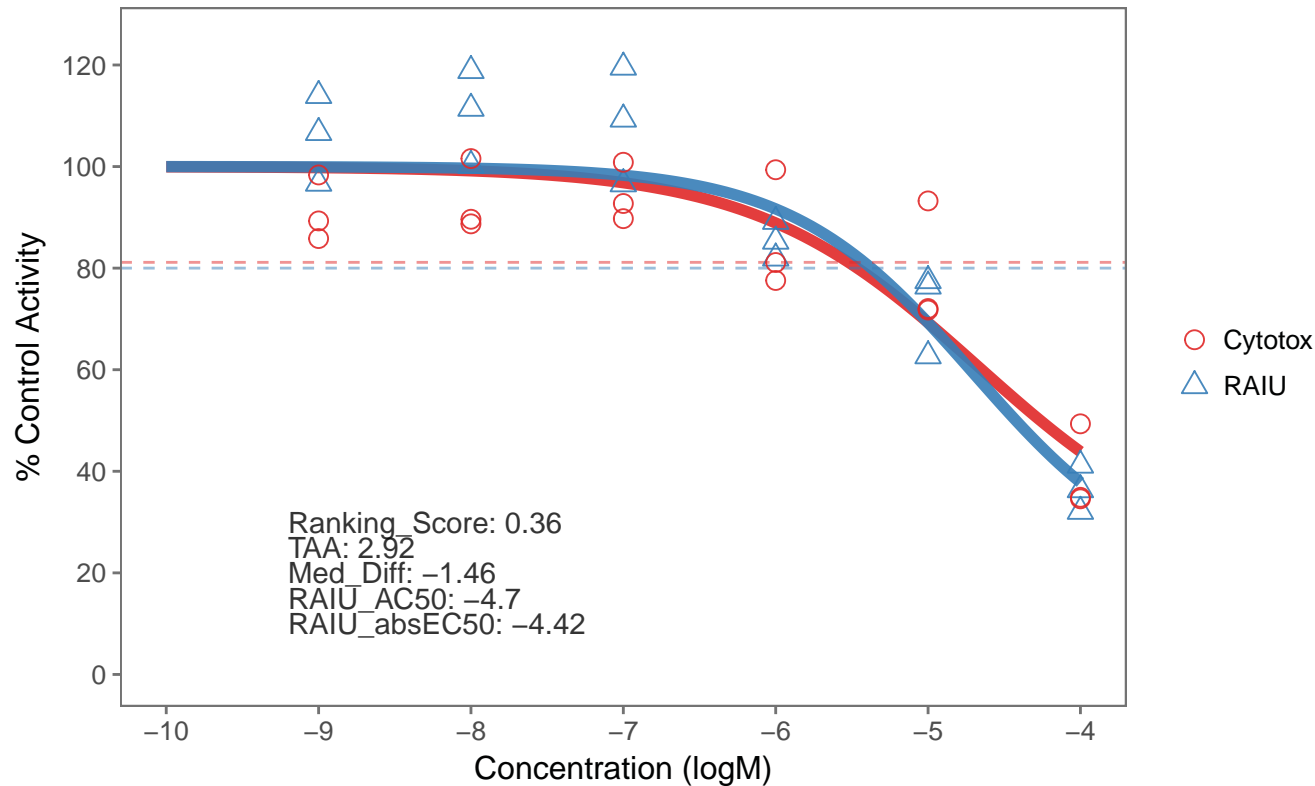



113. SPID: TP0001964B03

NAME: 1-(6-tert-Butyl-1,1-dimethyl-2,3-dihydro-1H-inden-4-yl)ethanone

CAS NO: 13171-00-1

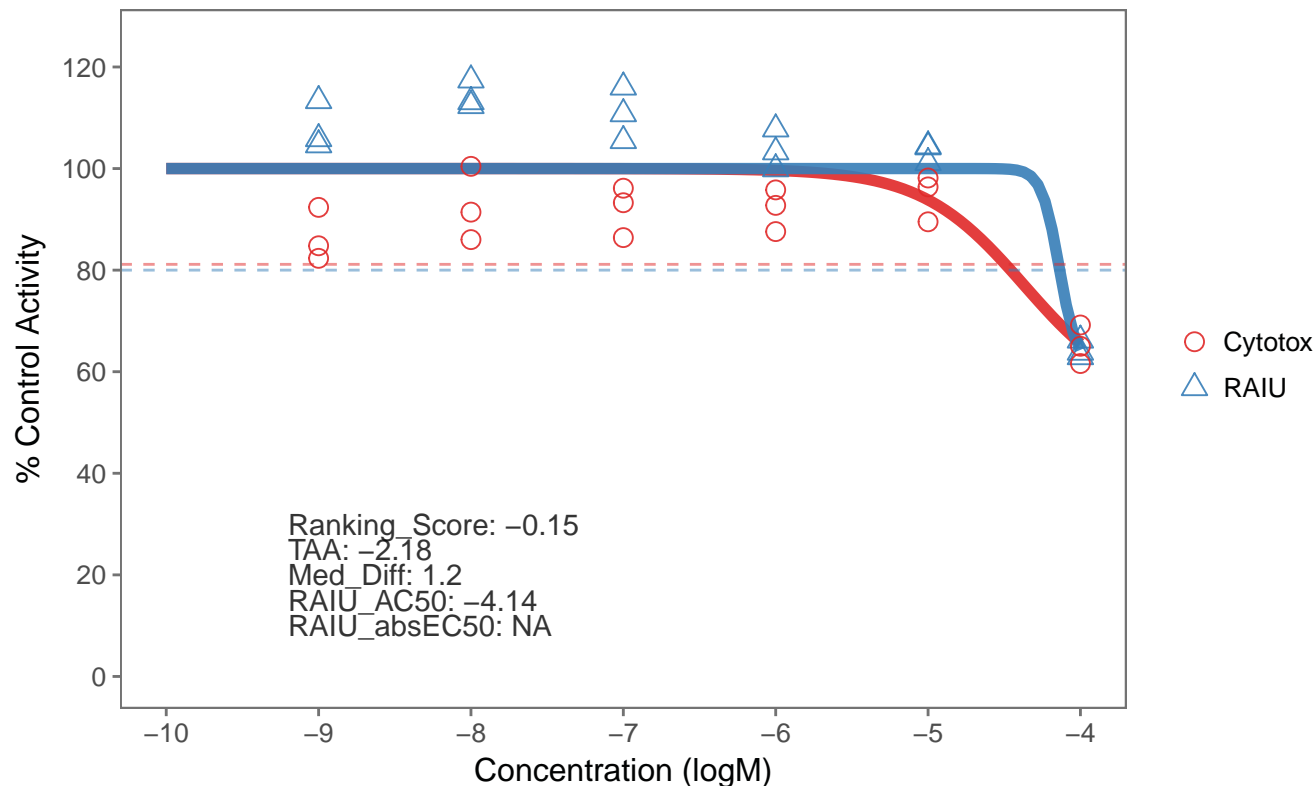

114. SPID: TP0001955B03

NAME: Epoxiconazole

CAS NO: 133855-98-8

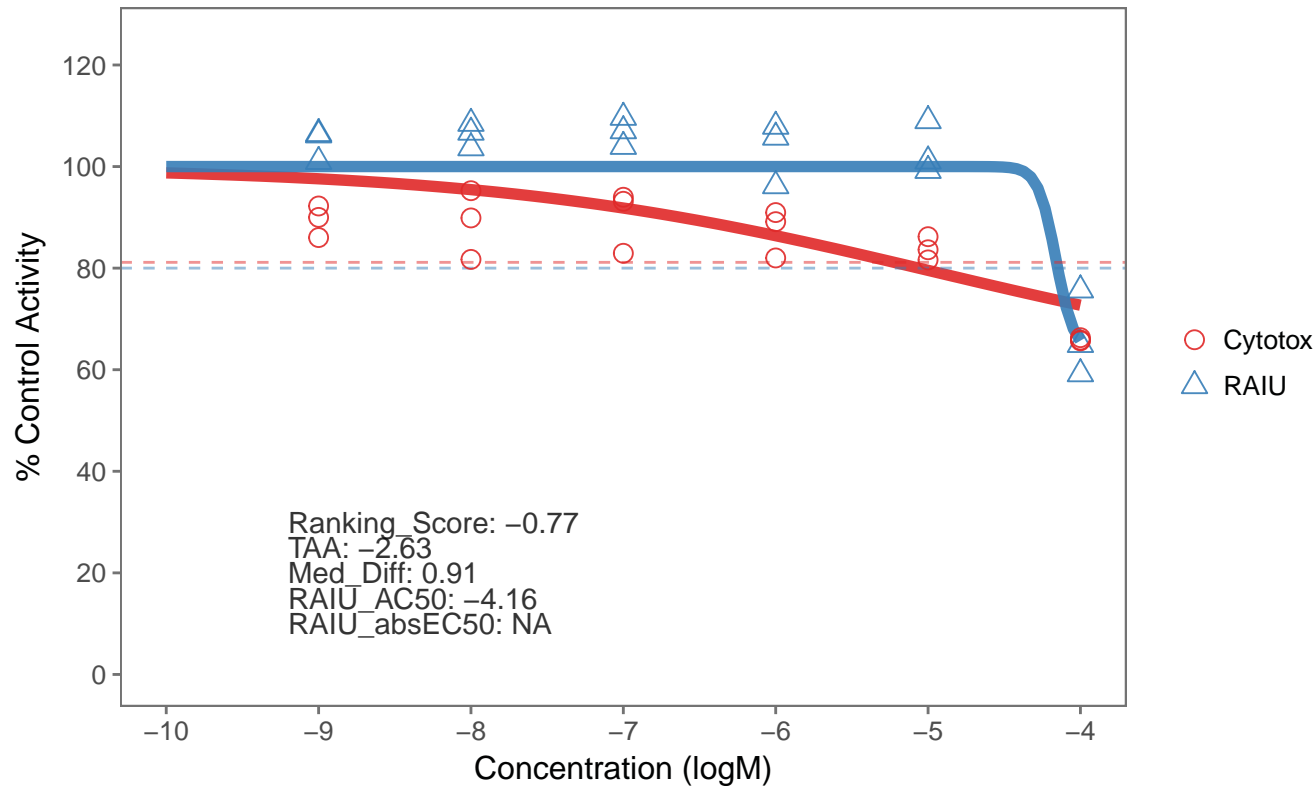

115. SPID: TP0001962E05  
NAME: 1,3-Diphenyl-1,3-propanedione  
CAS NO: 120-46-7

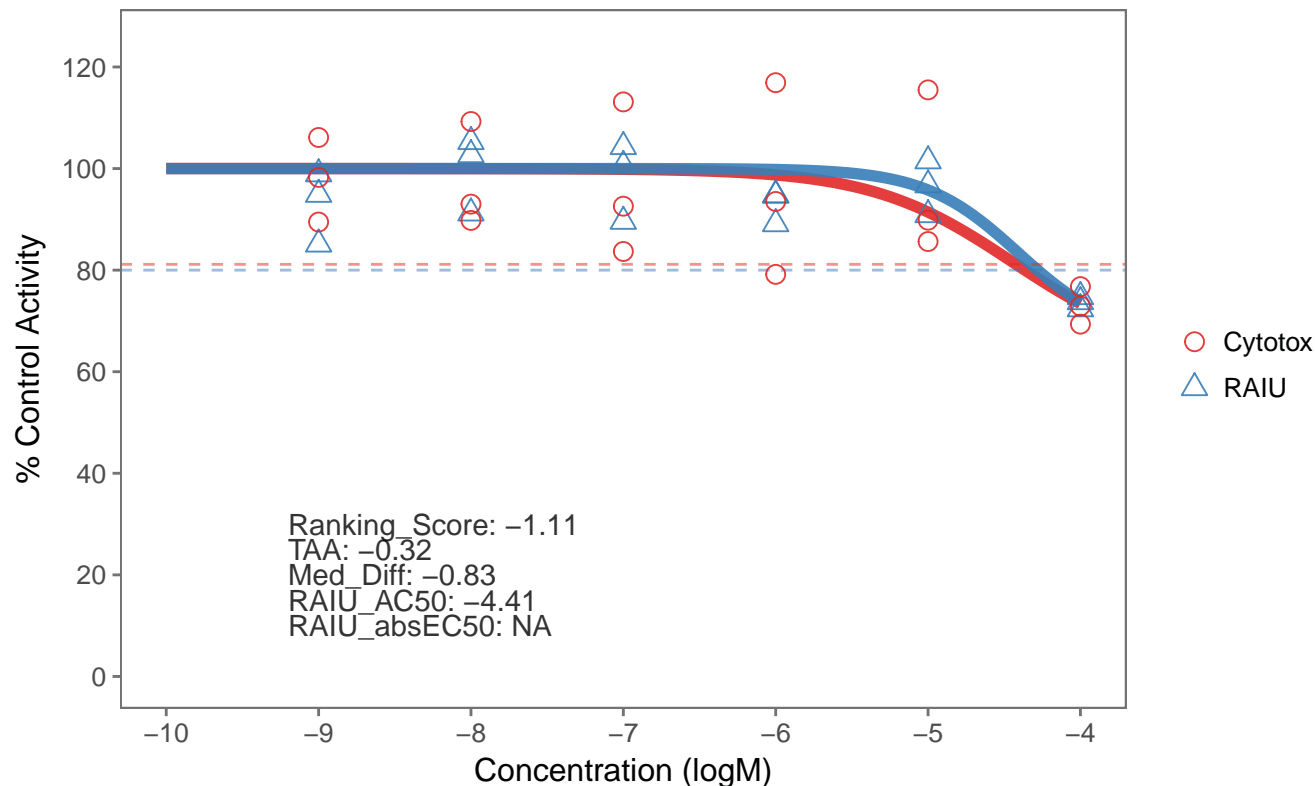

116. SPID: TP0001953C04  
NAME: Chlorophacinone  
CAS NO: 3691-35-8

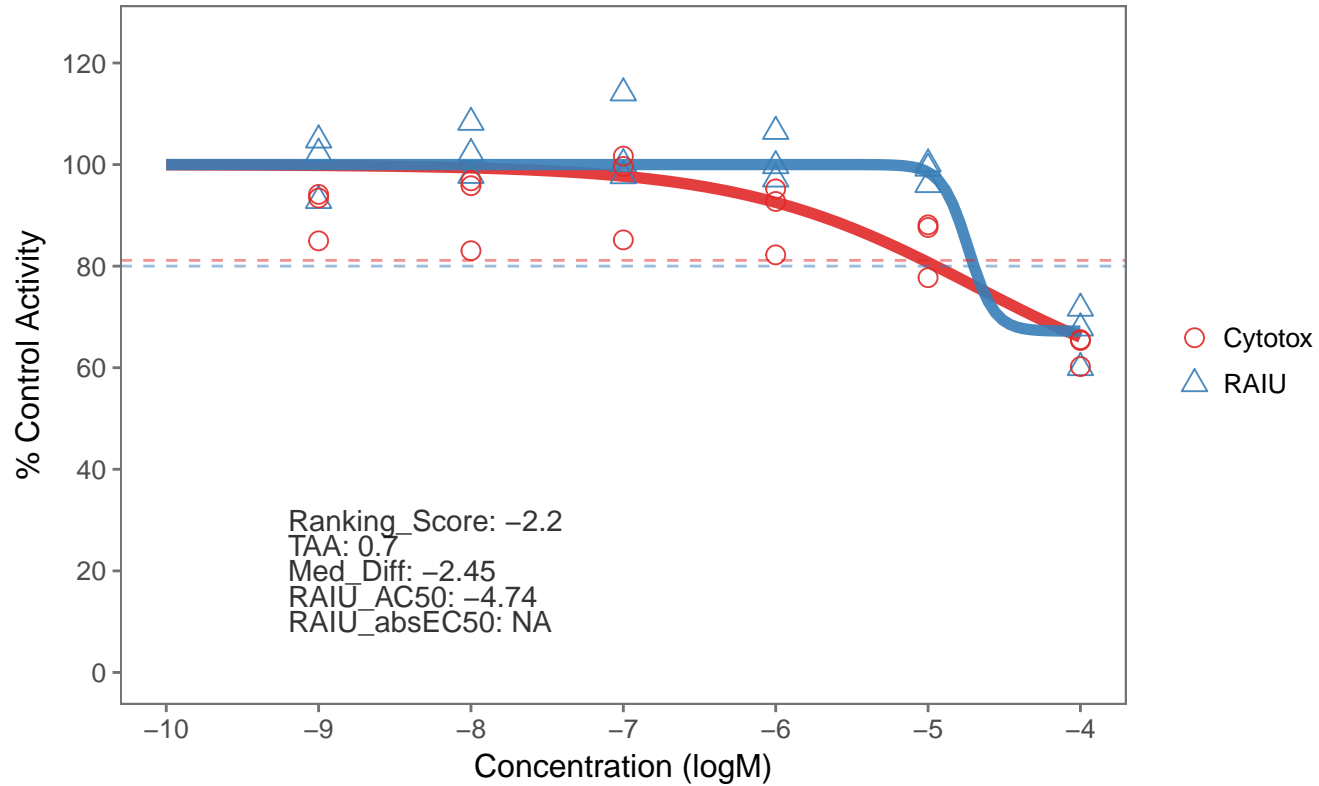

117. SPID: TP0001960E03

NAME: Azoxystrobin

CAS NO: 131860-33-8

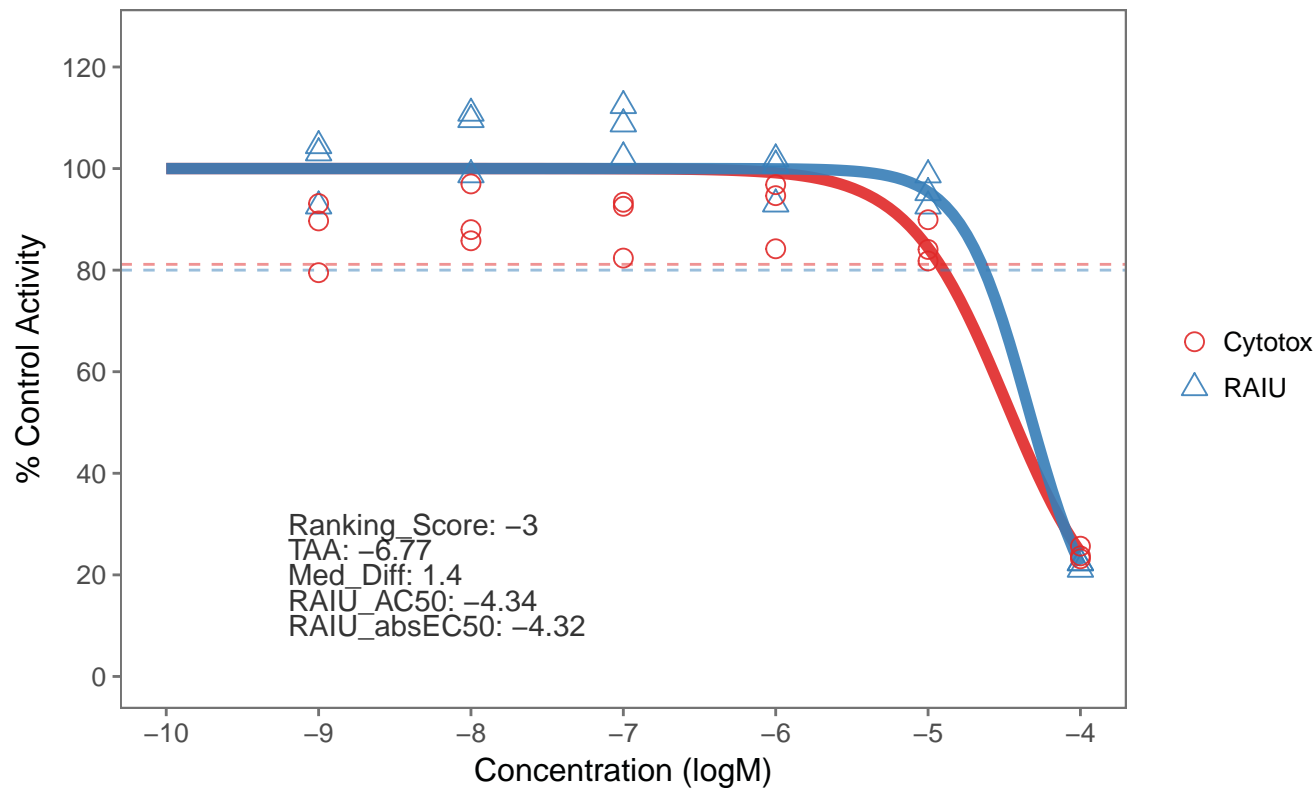

118. SPID: TP0001959B07

NAME: Acetyl cedrene

CAS NO: 32388-55-9

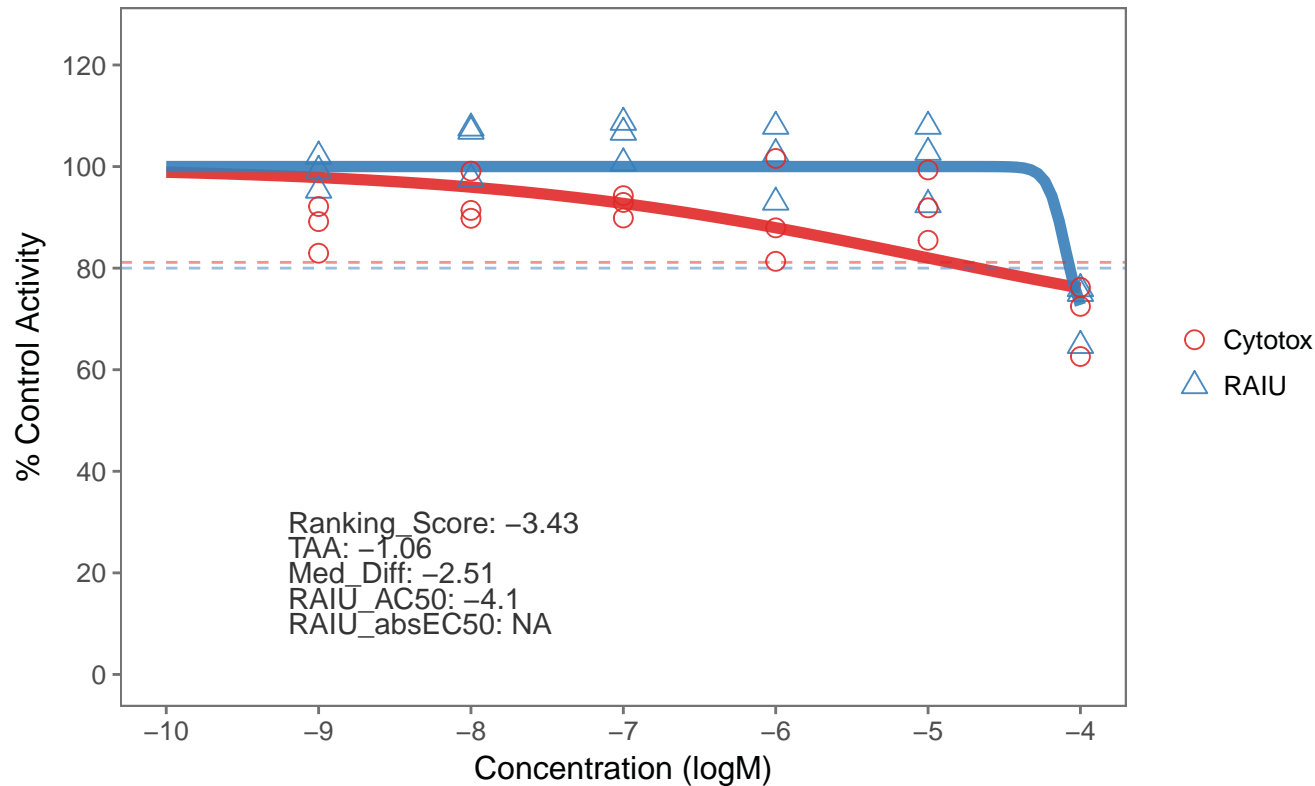

119. SPID: TP0001954F10

NAME: Nonoxynol

CAS NO: 26027-38-3

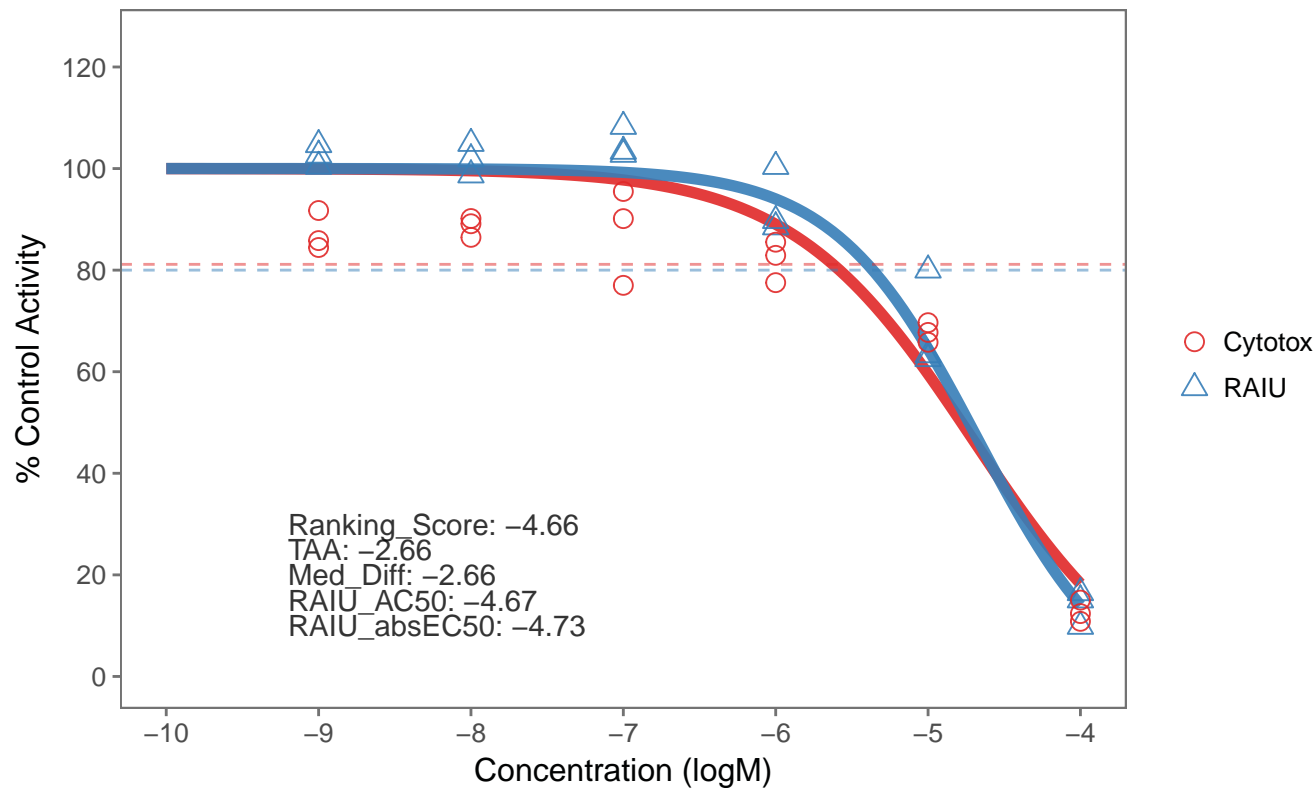

120. SPID: TP0001964G03  
NAME: 2-Ethylhexylparaben  
CAS NO: 5153-25-3

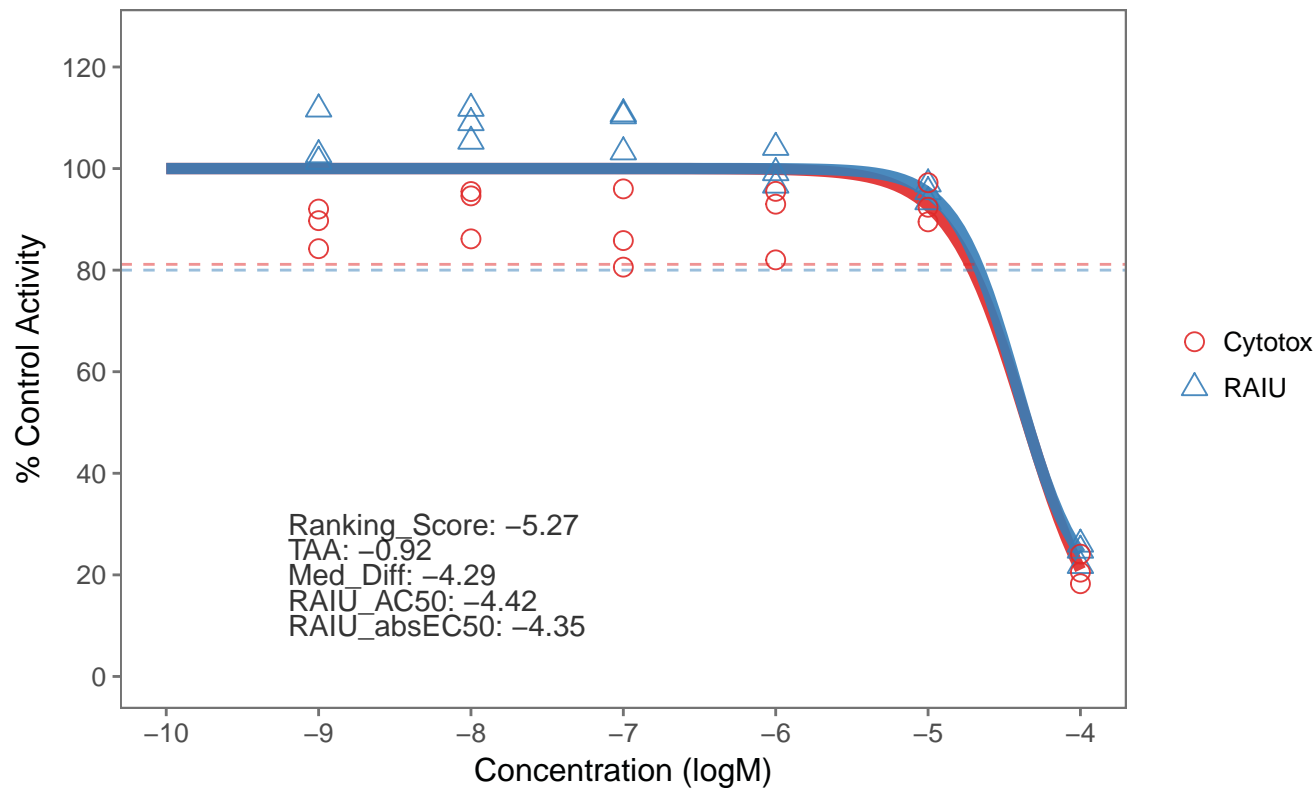



121. SPID: TP0001956E07

NAME: Farnesol

CAS NO: 4602-84-0

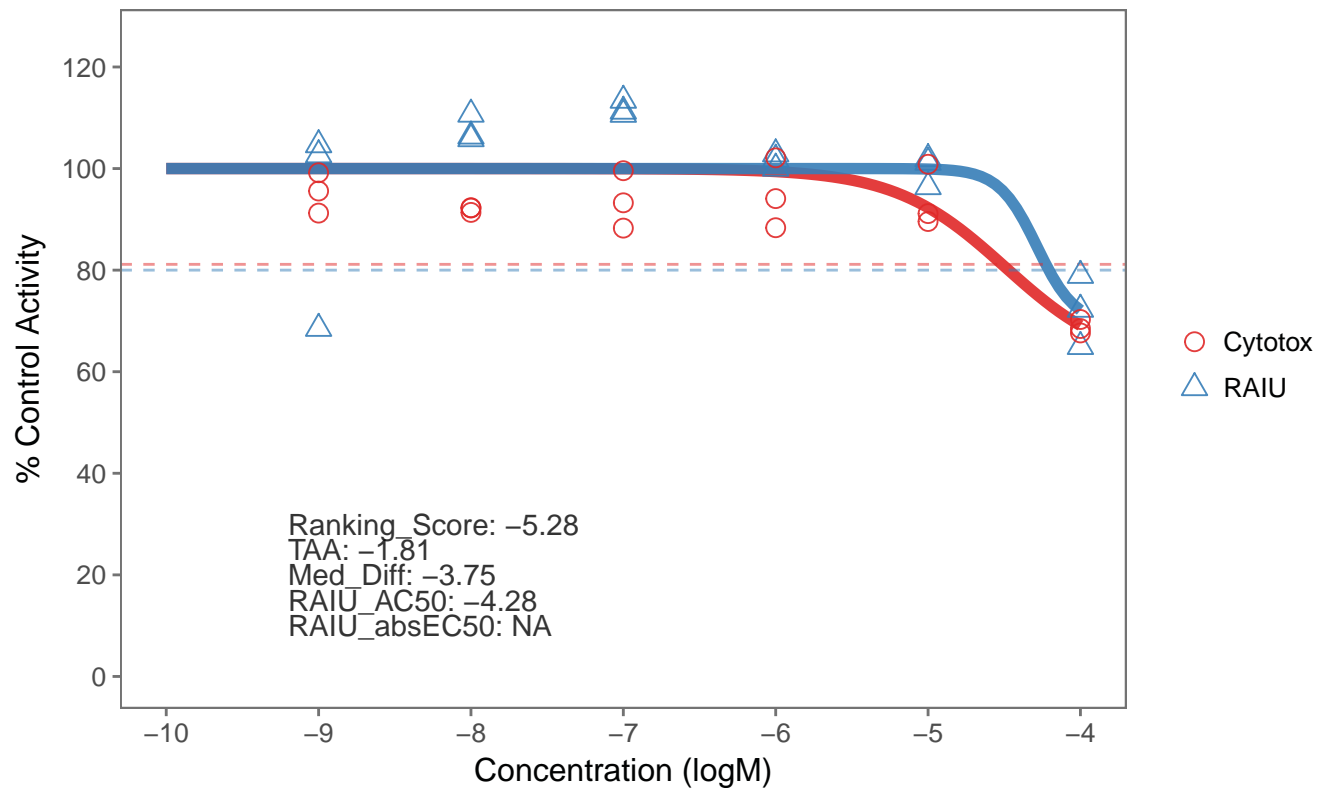

122. SPID: TP0001959B01

NAME: Heptylparaben

CAS NO: 1085-12-7

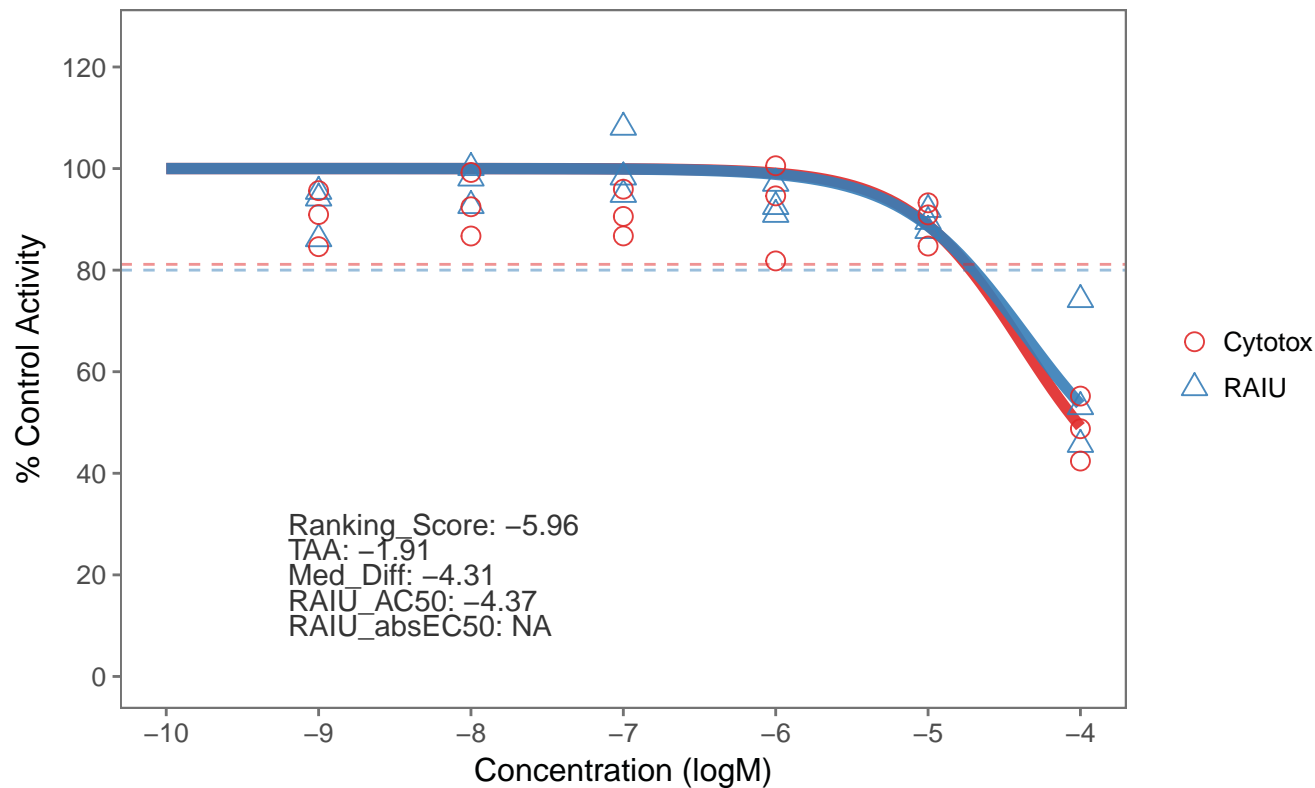

123. SPID: TP0001960E11  
NAME: 4,5-Dichloro-3H-1,2-dithiol-3-one  
CAS NO: 1192-52-5

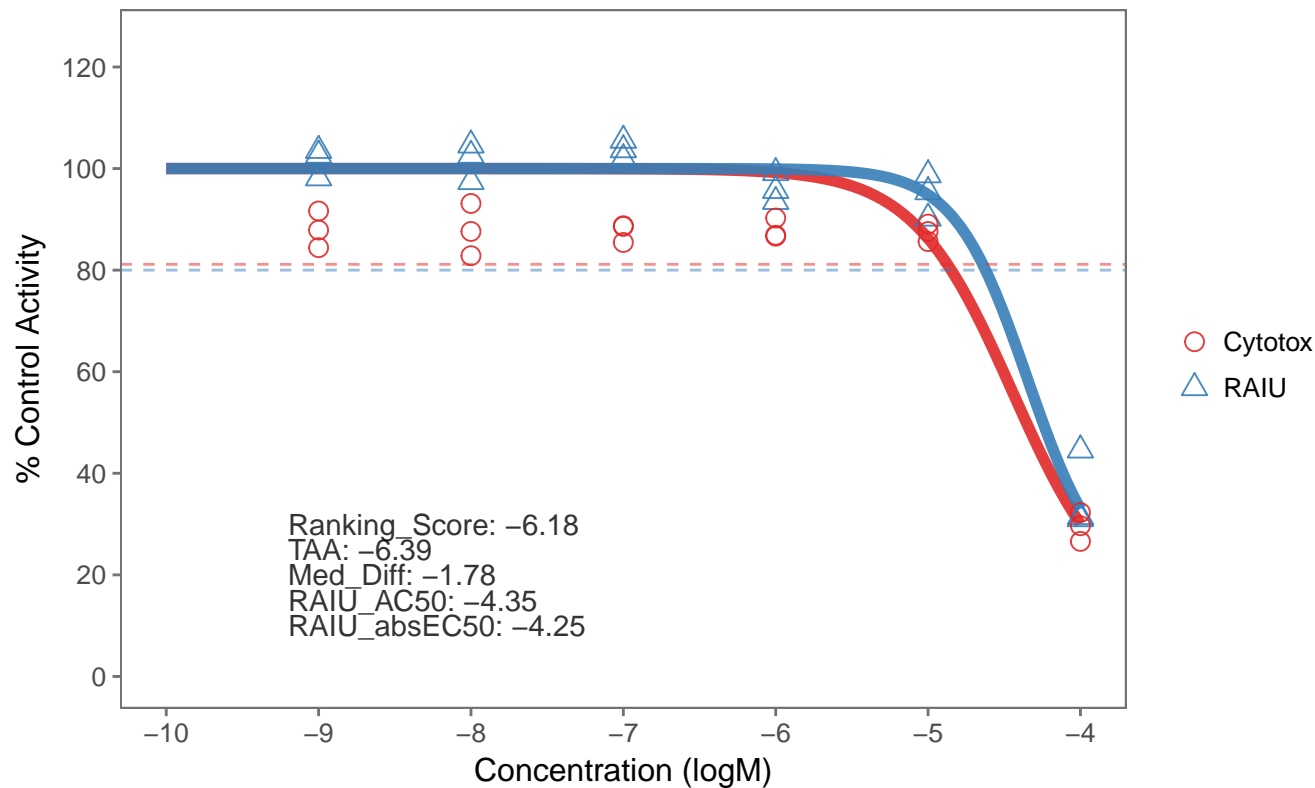

124. SPID: TP0001964F05  
NAME: Disiquonium chloride  
CAS NO: 68959-20-6

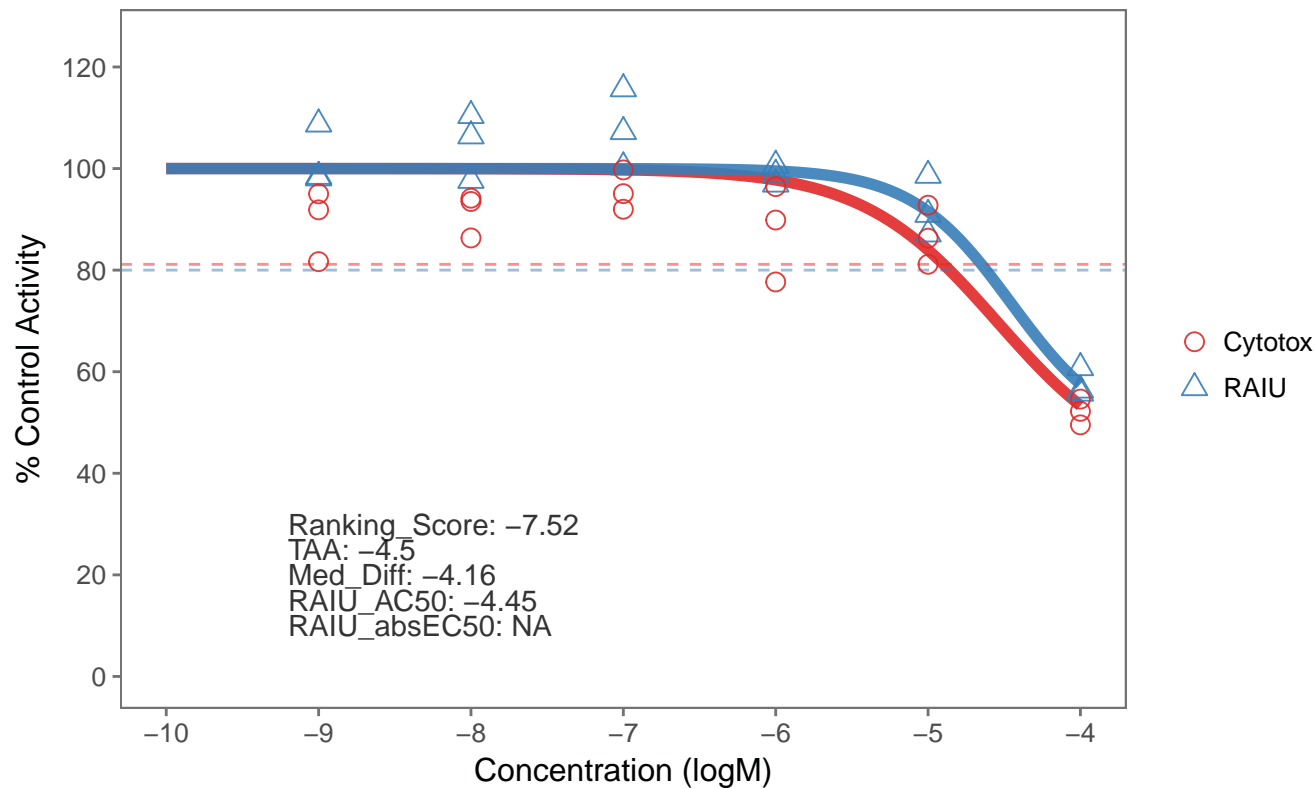

125. SPID: TP0001962C07

NAME: Equilin

CAS NO: 474-86-2

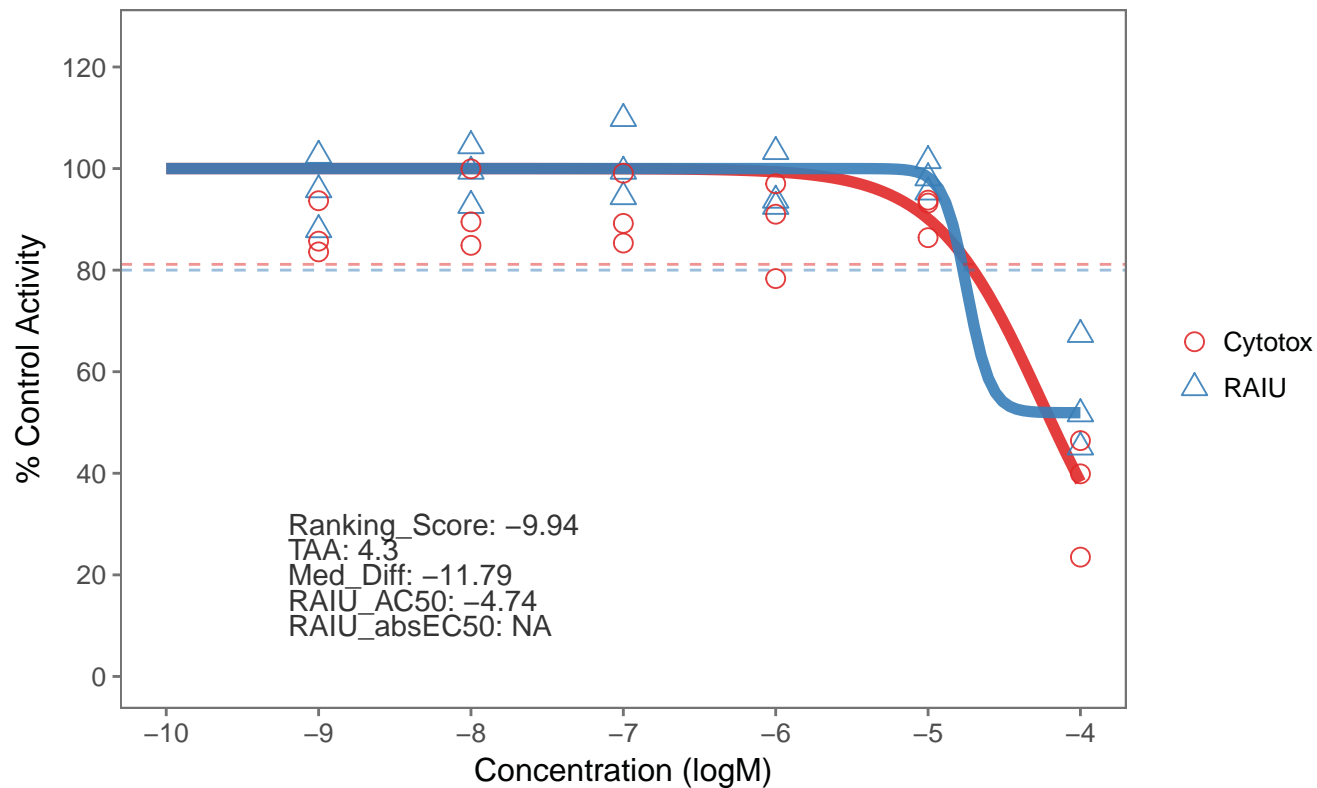

126. SPID: TP0001956F08

NAME: Apigenin

CAS NO: 520-36-5

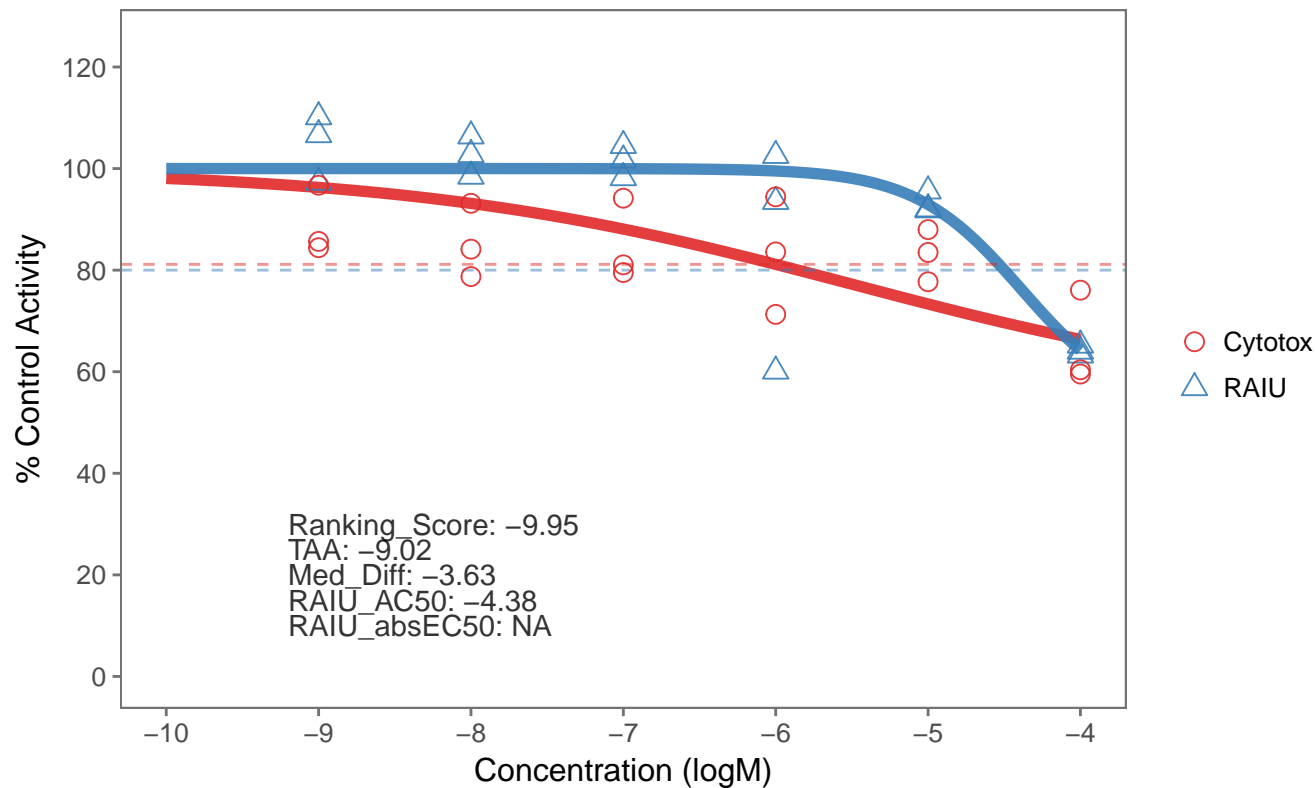

127. SPID: TP0001960E01  
NAME: 2-Chloro-4-phenylphenol  
CAS NO: 92-04-6

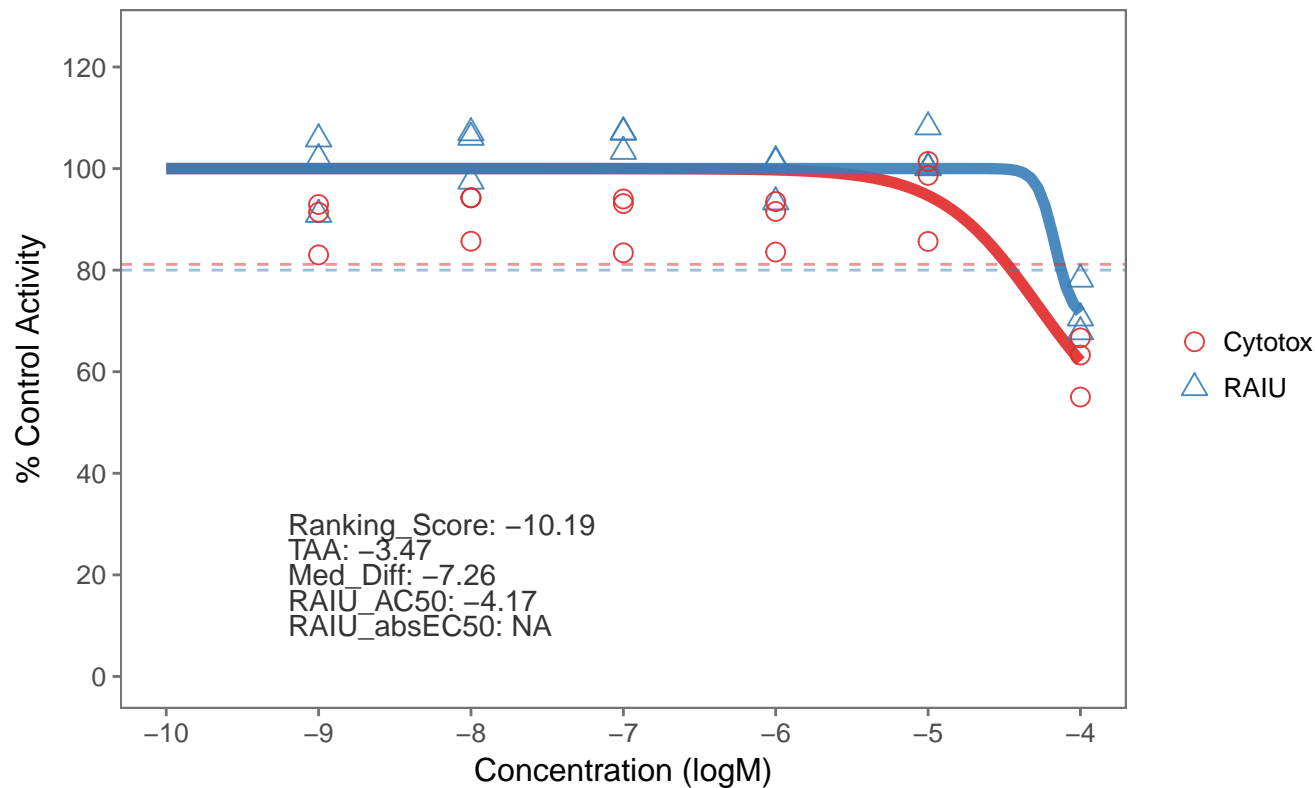

128. SPID: TP0001964E05

NAME: Bromuconazole

CAS NO: 116255-48-2

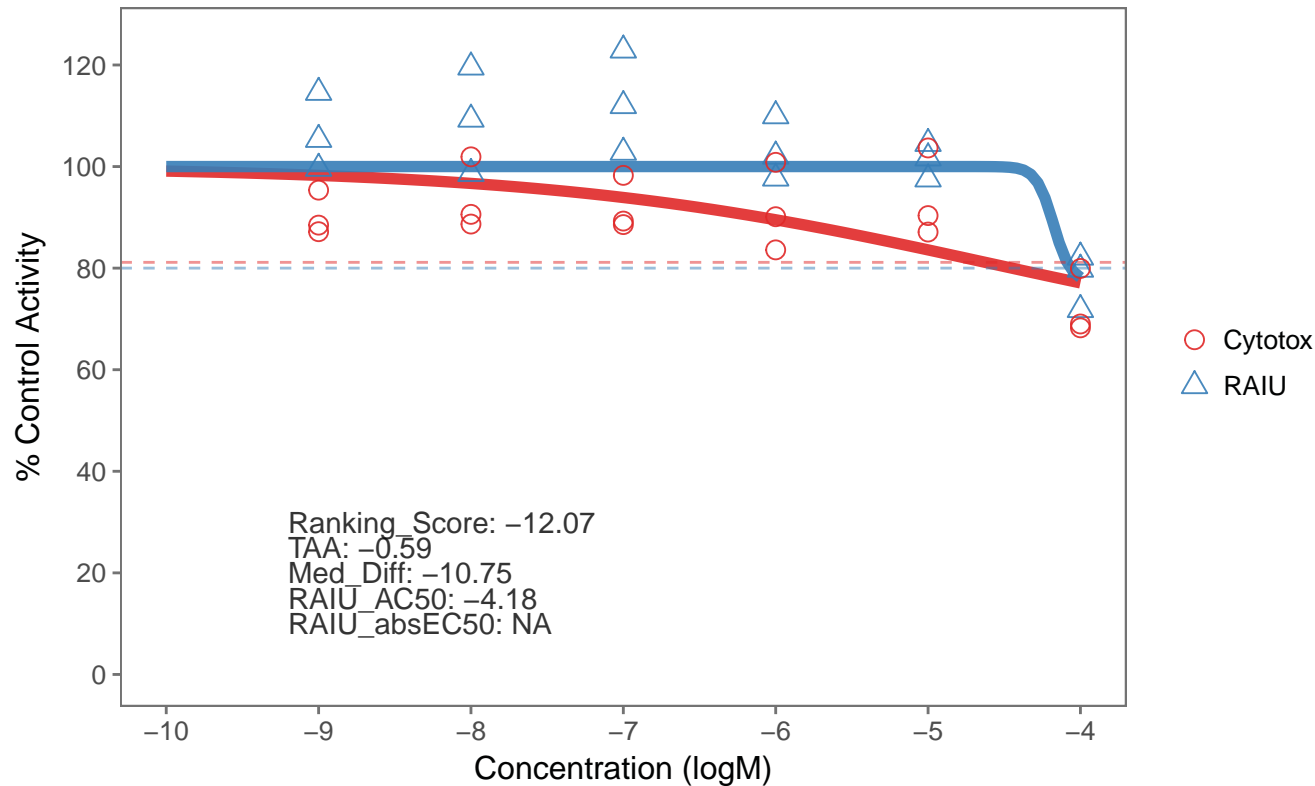



129. SPID: TP0001963C11  
NAME: Methyltrioctylammonium chloride  
CAS NO: 5137-55-3

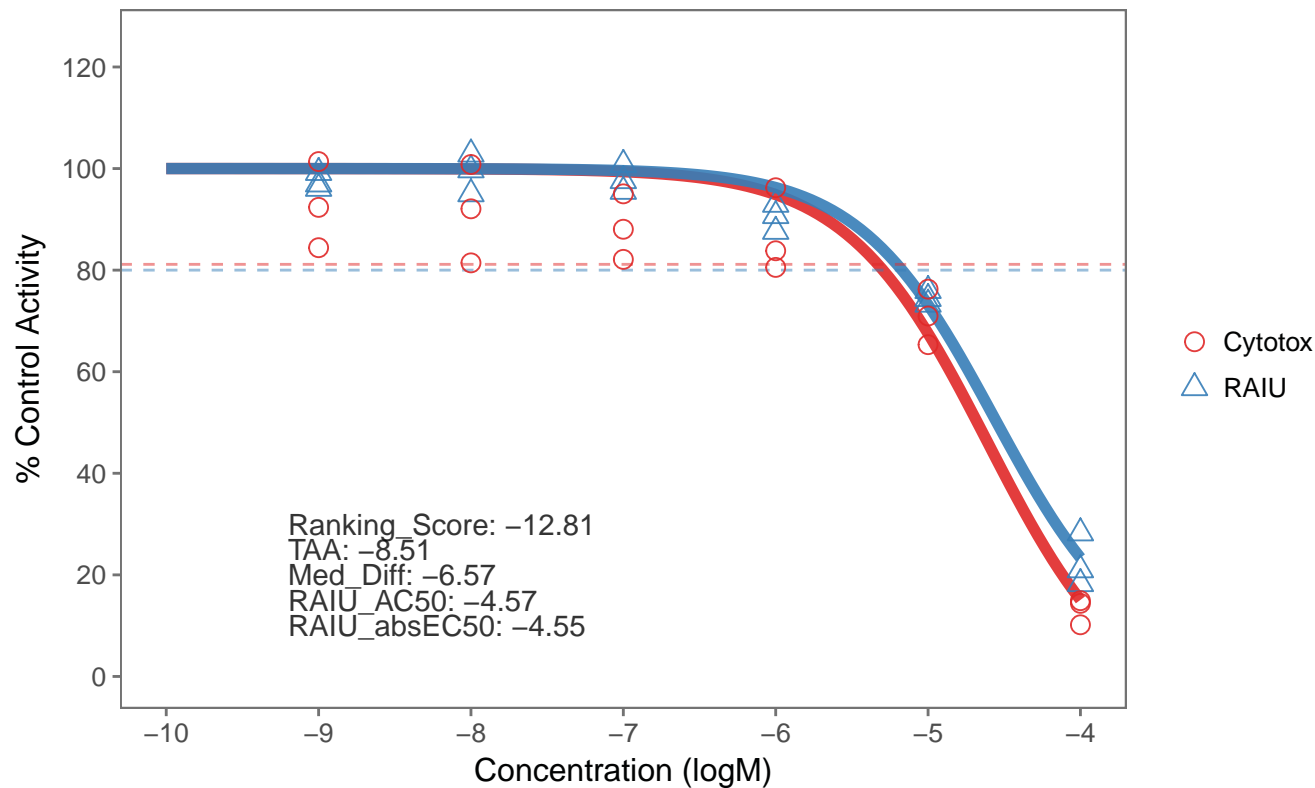

130. SPID: TP0001962C10

NAME: Oleyl sarcosine

CAS NO: 110-25-8

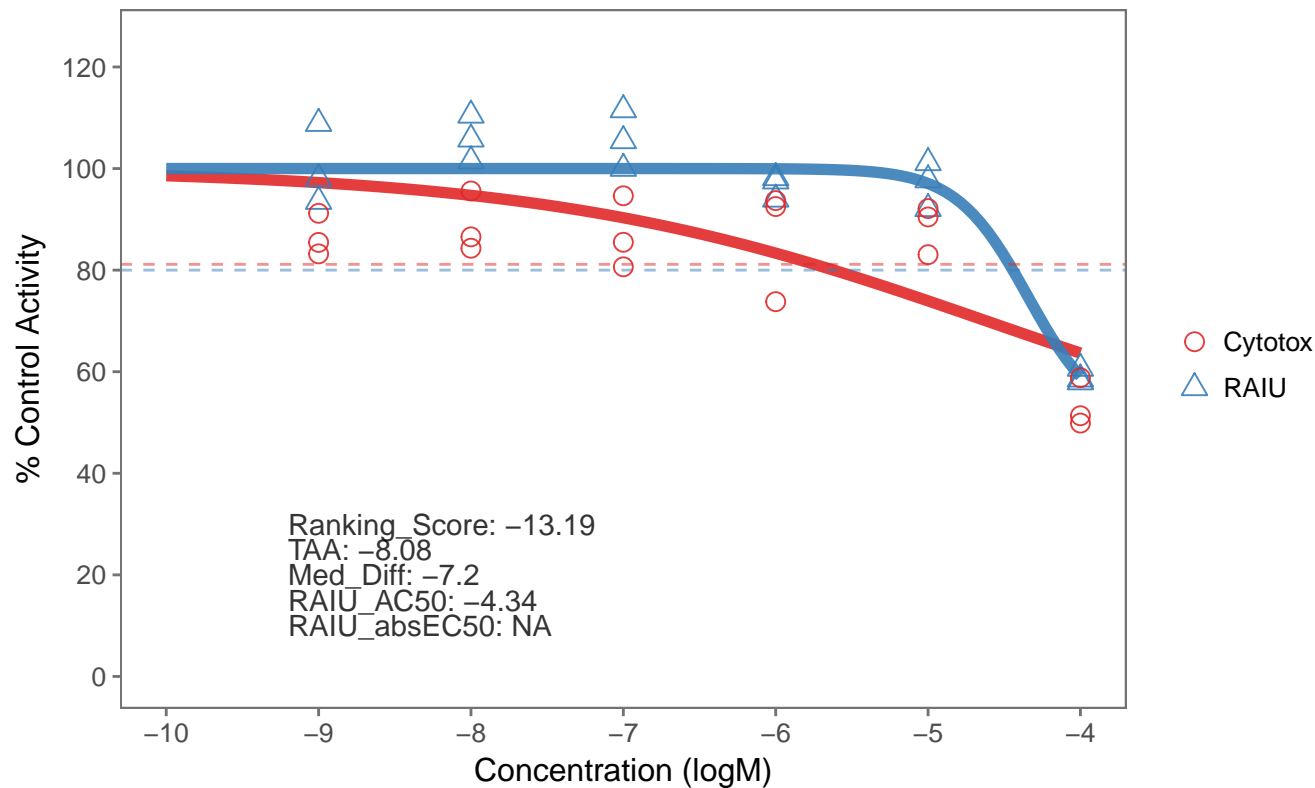

131. SPID: TP0001954G03  
NAME: 4-tert-Butylphenyl salicylate  
CAS NO: 87-18-3

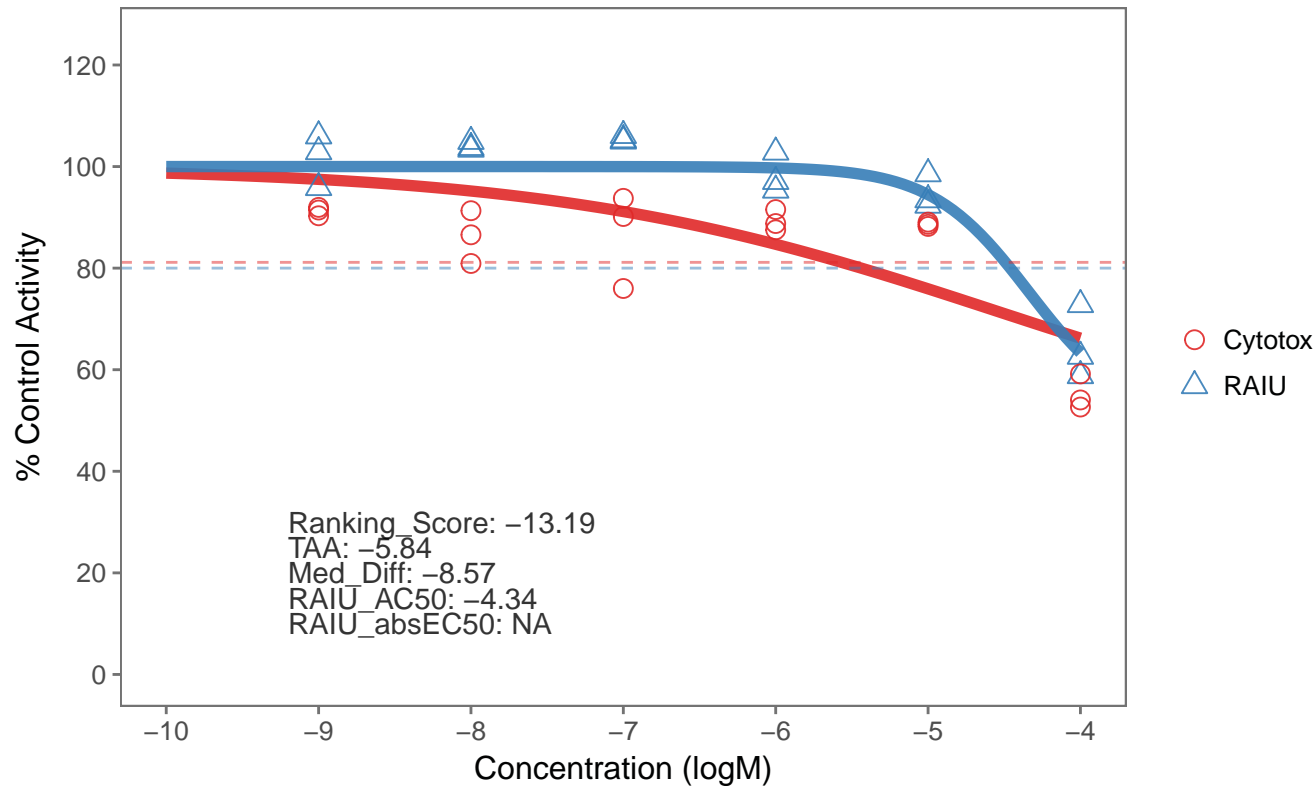

132. SPID: TP0001962F10

NAME: o,p'-DDD

CAS NO: 53-19-0

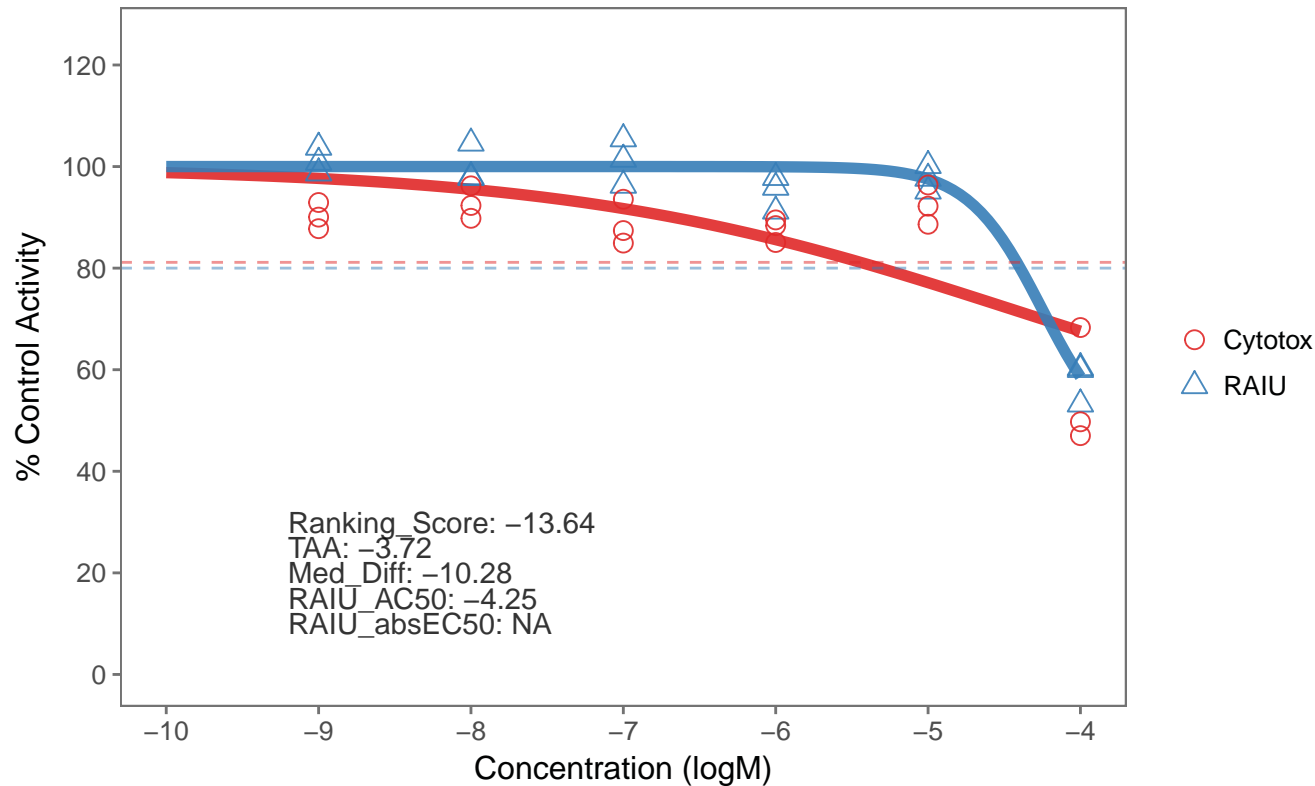

133. SPID: TP0001958G09  
NAME: C.I. Direct Yellow 12  
CAS NO: 2870-32-8

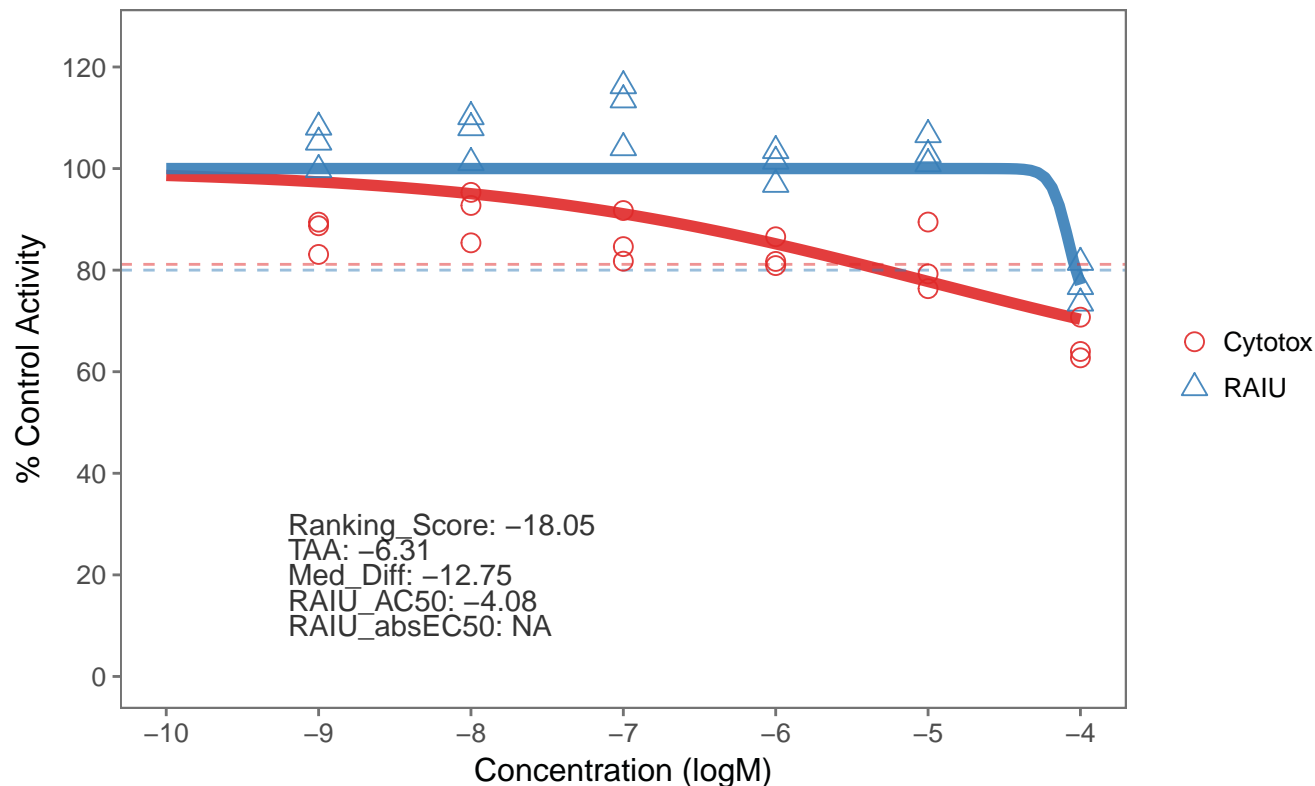

134. SPID: TP0001961G05  
NAME: Chlorhexidine diacetate  
CAS NO: 56-95-1

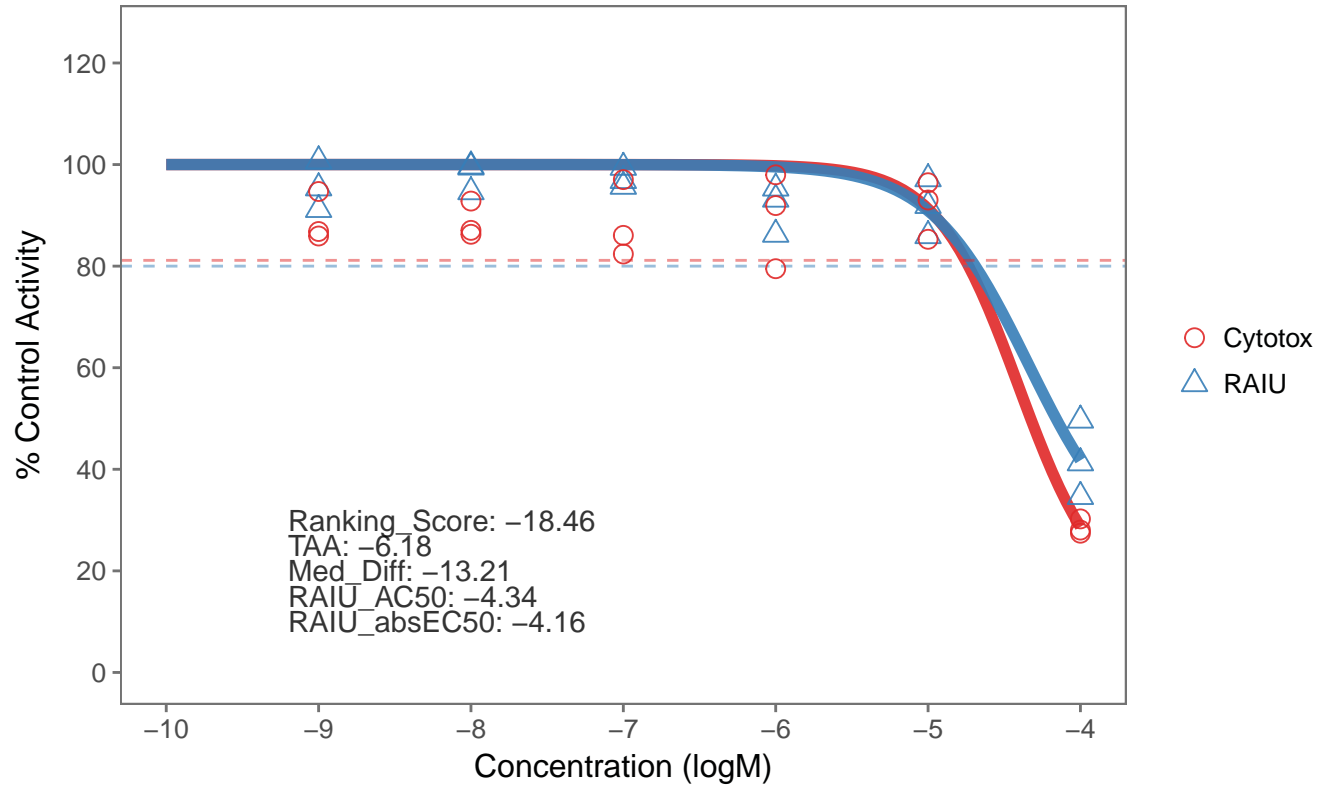

135. SPID: TP0001965A01

NAME: Kaempferol

CAS NO: 520-18-3

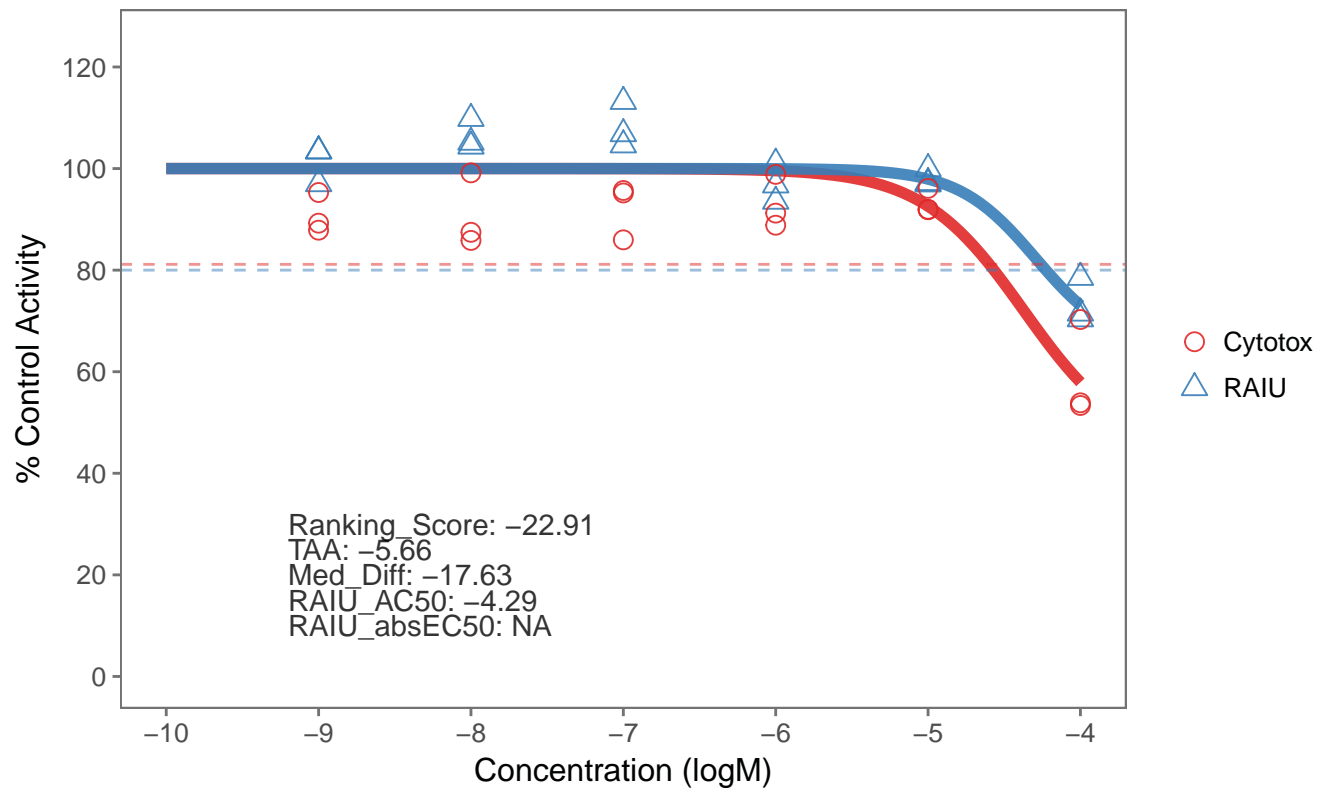

136. SPID: TP0001957G01  
NAME: 1-Phenyl-1H-pyrrole-2,5-dione  
CAS NO: 941-69-5

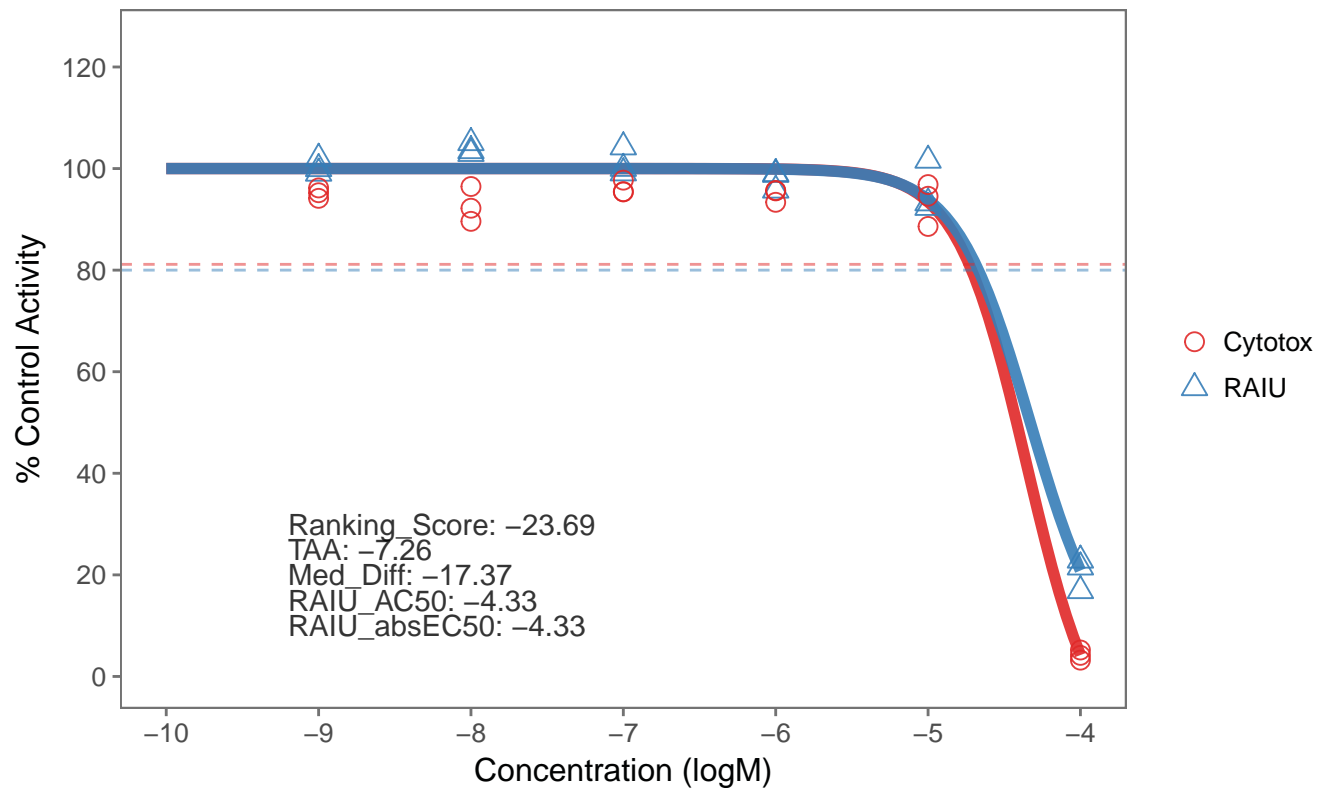



137. SPID: TP0001964D02  
NAME: 1,4-Dihydroxy-2-naphthoic acid  
CAS NO: 31519-22-9

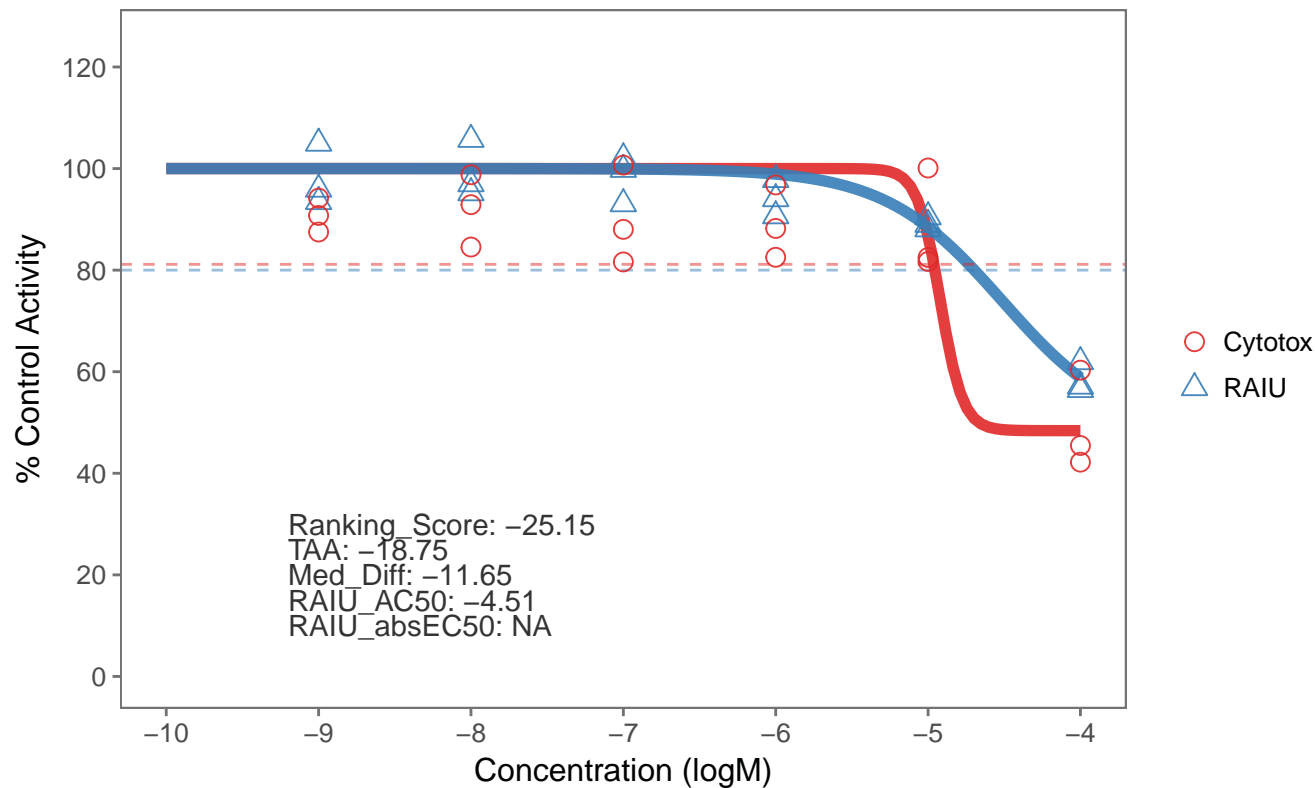

138. SPID: TP0001956E01  
NAME: C.I. Disperse Orange 37  
CAS NO: 13301-61-6

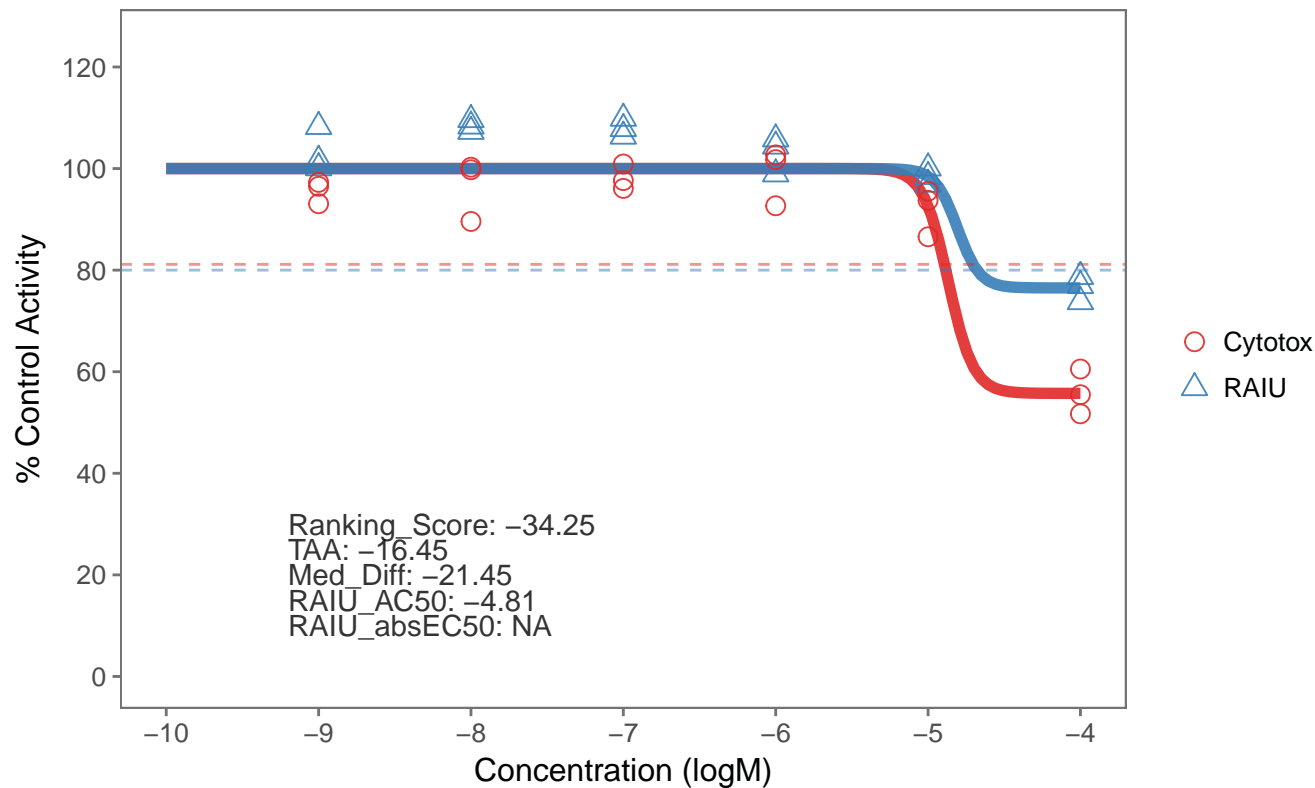

139. SPID: TP0001956B09  
NAME: N-(Cyclohexylthio)phthalimide  
CAS NO: 17796-82-6

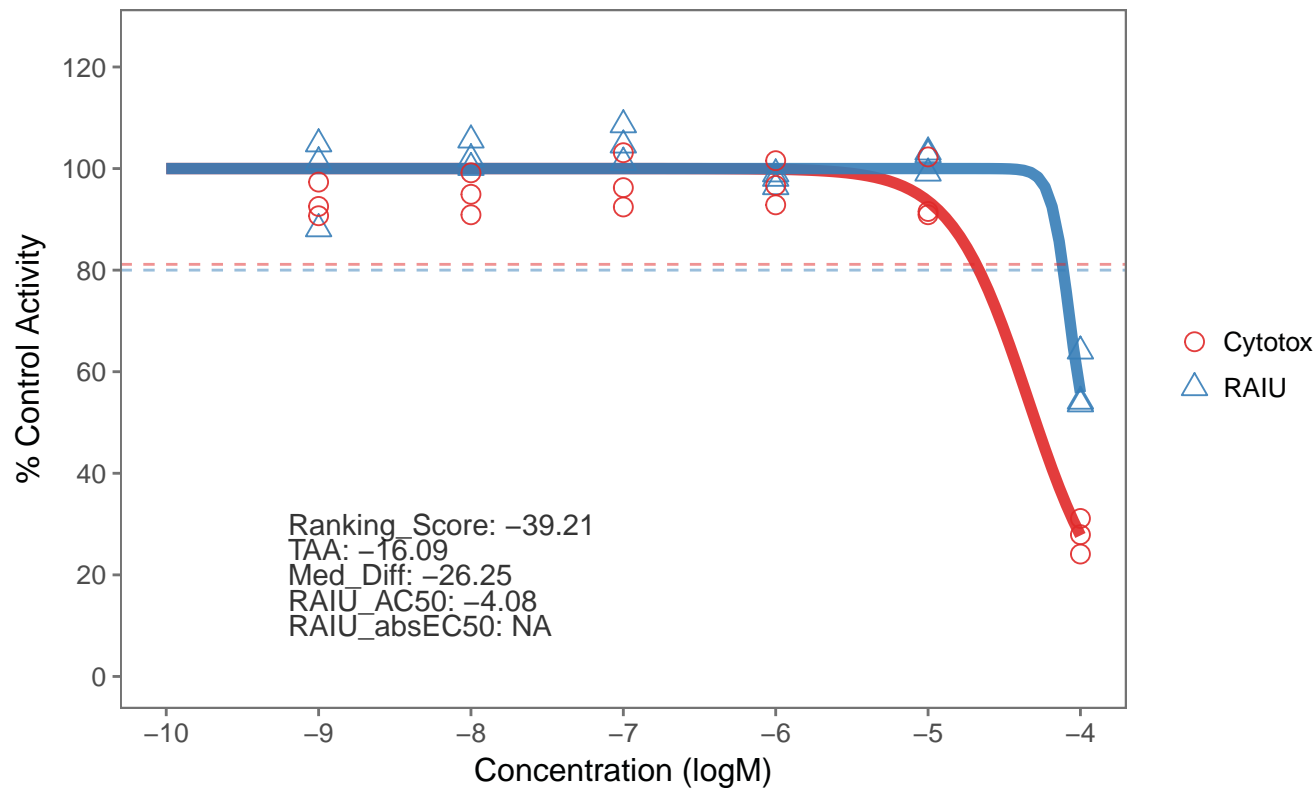

140. SPID: TP0001965C01

NAME: Zearalenone

CAS NO: 17924-92-4

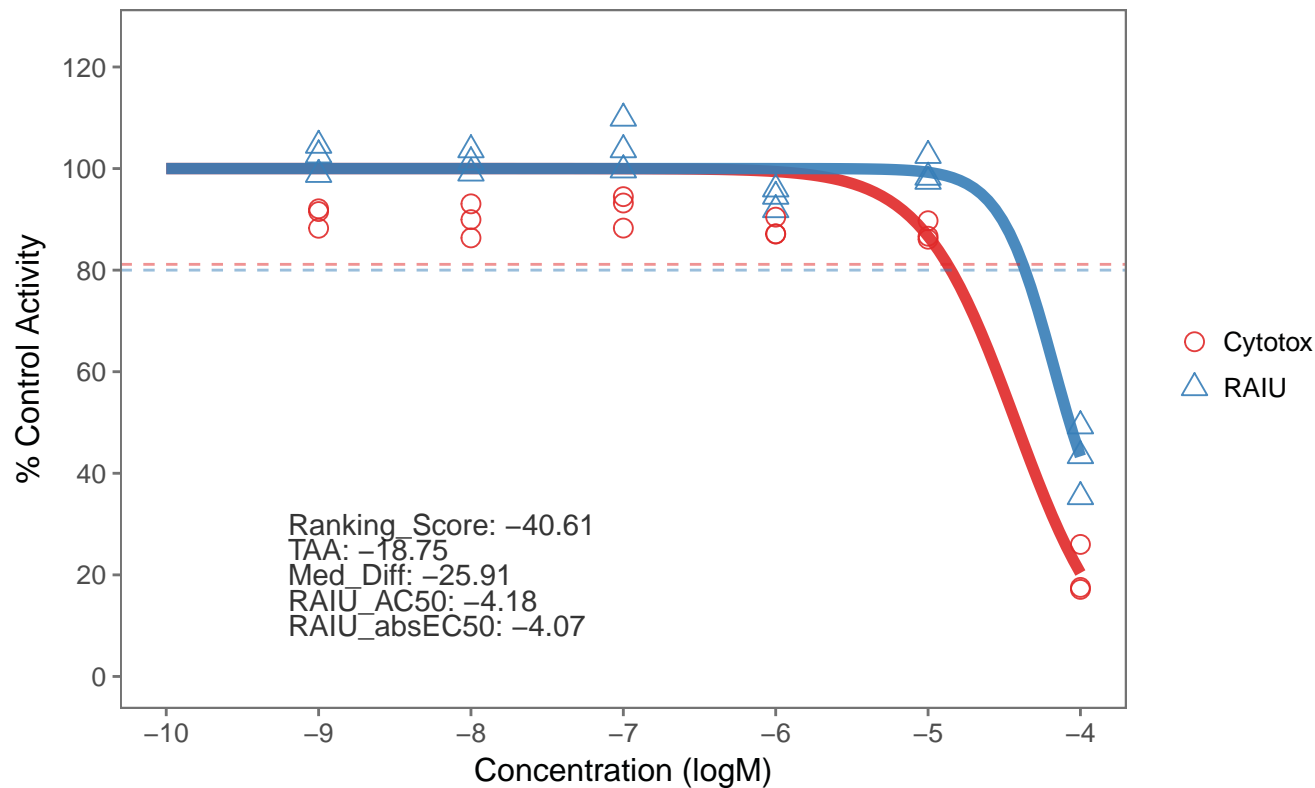

141. SPID: TP0001954G10  
NAME: Methylene blue  
CAS NO: 61-73-4

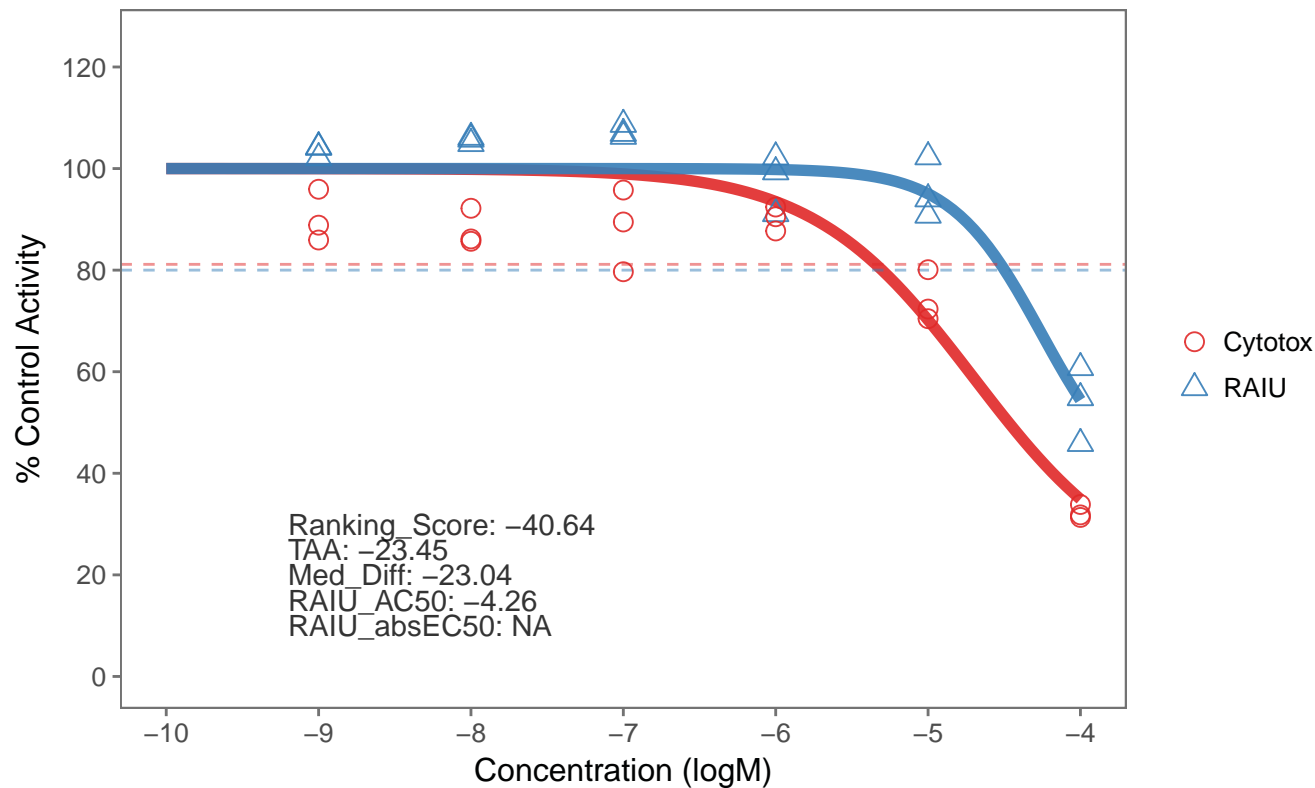

142. SPID: TP0001953G03  
NAME: Methyl abietate  
CAS NO: 127-25-3

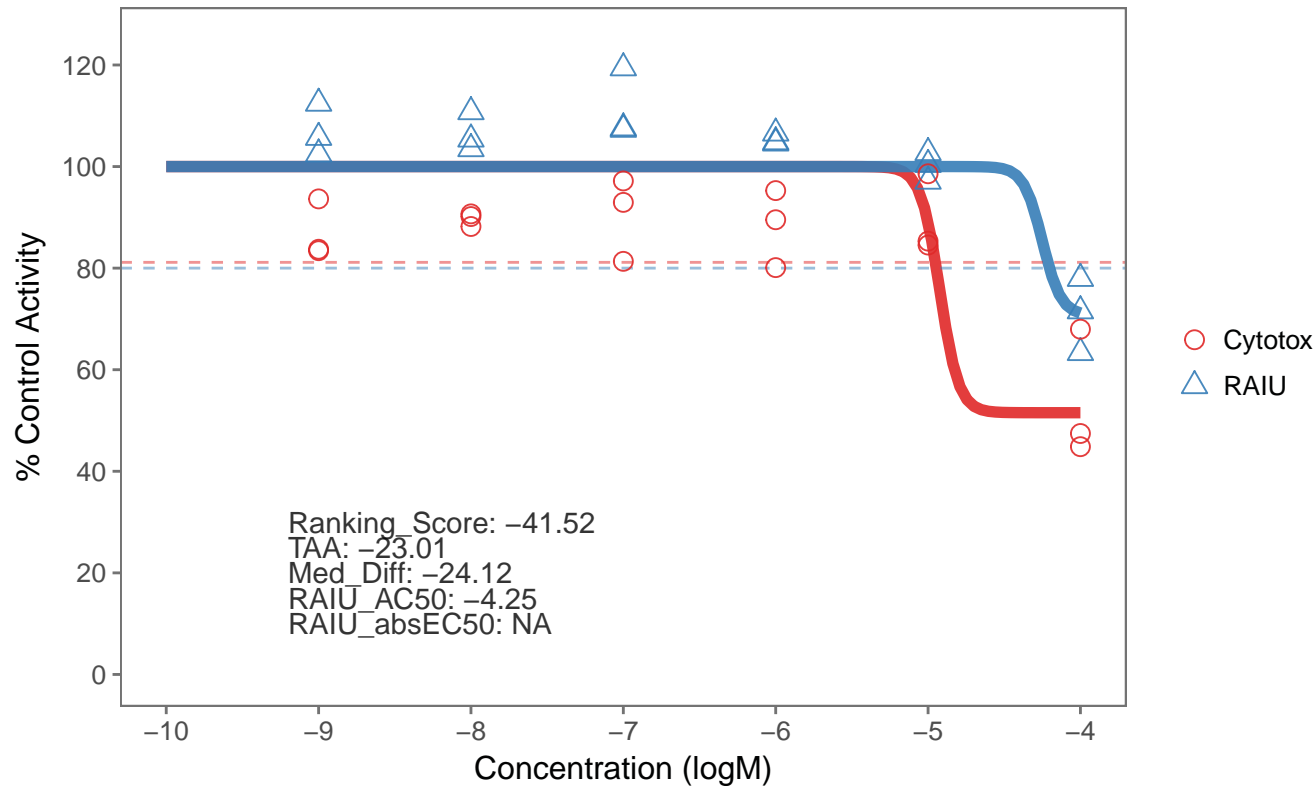

143. SPID: TP0001961F03  
NAME: Codlelure  
CAS NO: 33956-49-9

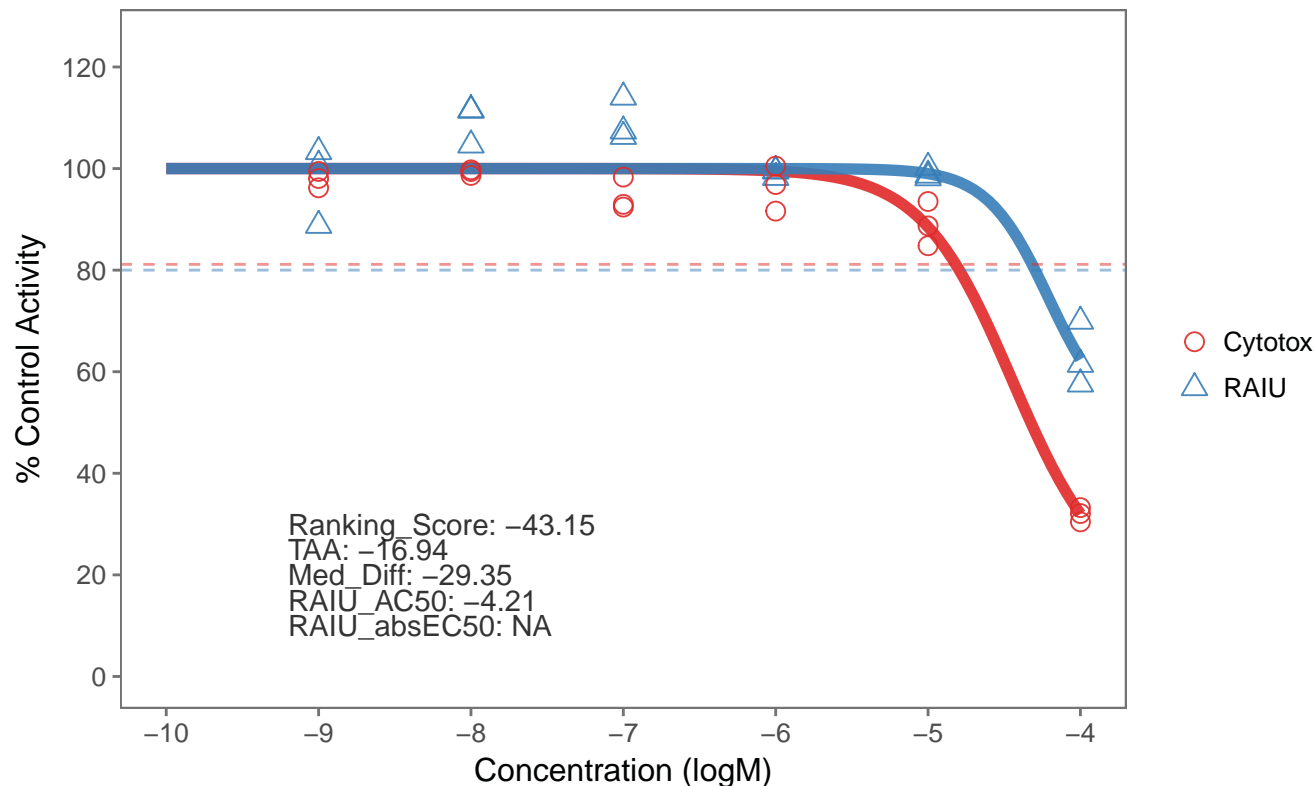

144. SPID: TP0001955C01  
NAME: C.I. Acid Red 114  
CAS NO: 6459-94-5

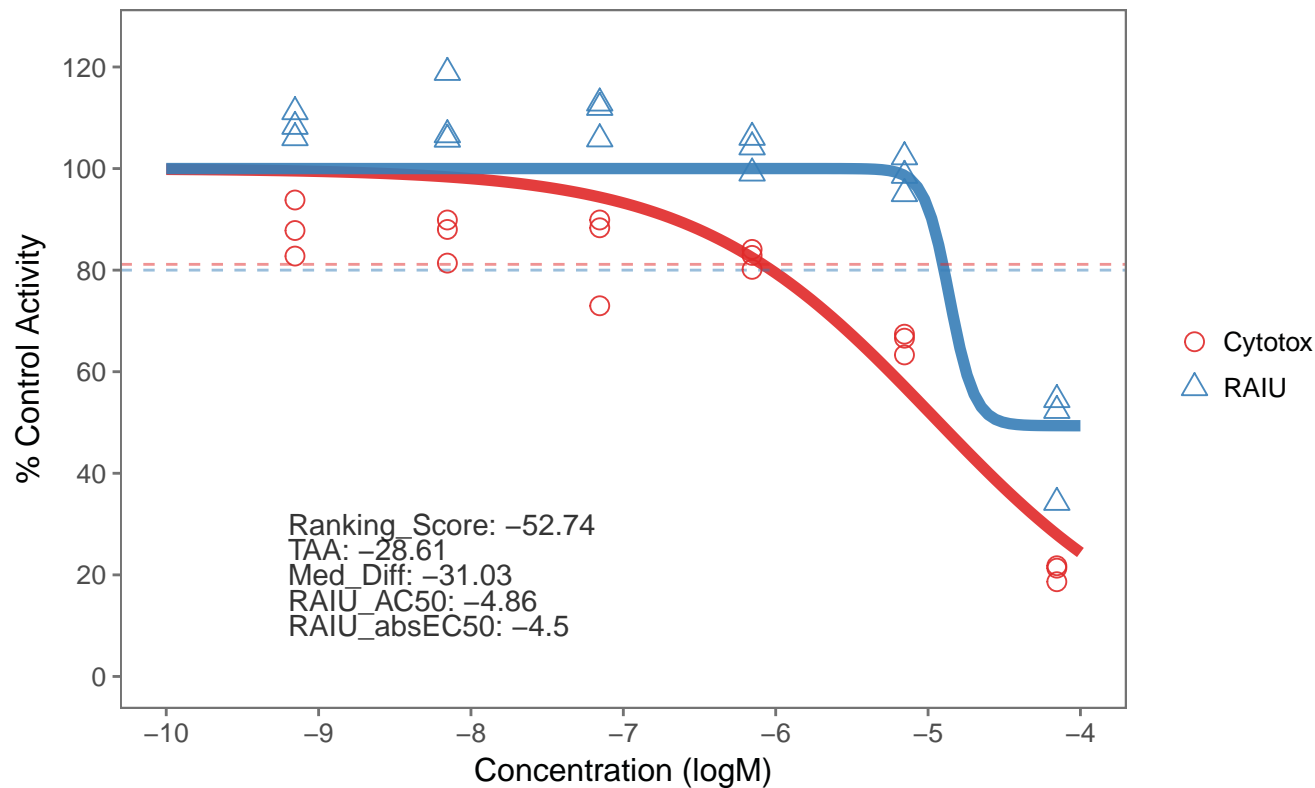



145. SPID: TP0001953E08  
NAME: 1,4-Bis(N-isopropylamino)anthraquinone  
CAS NO: 14233-37-5

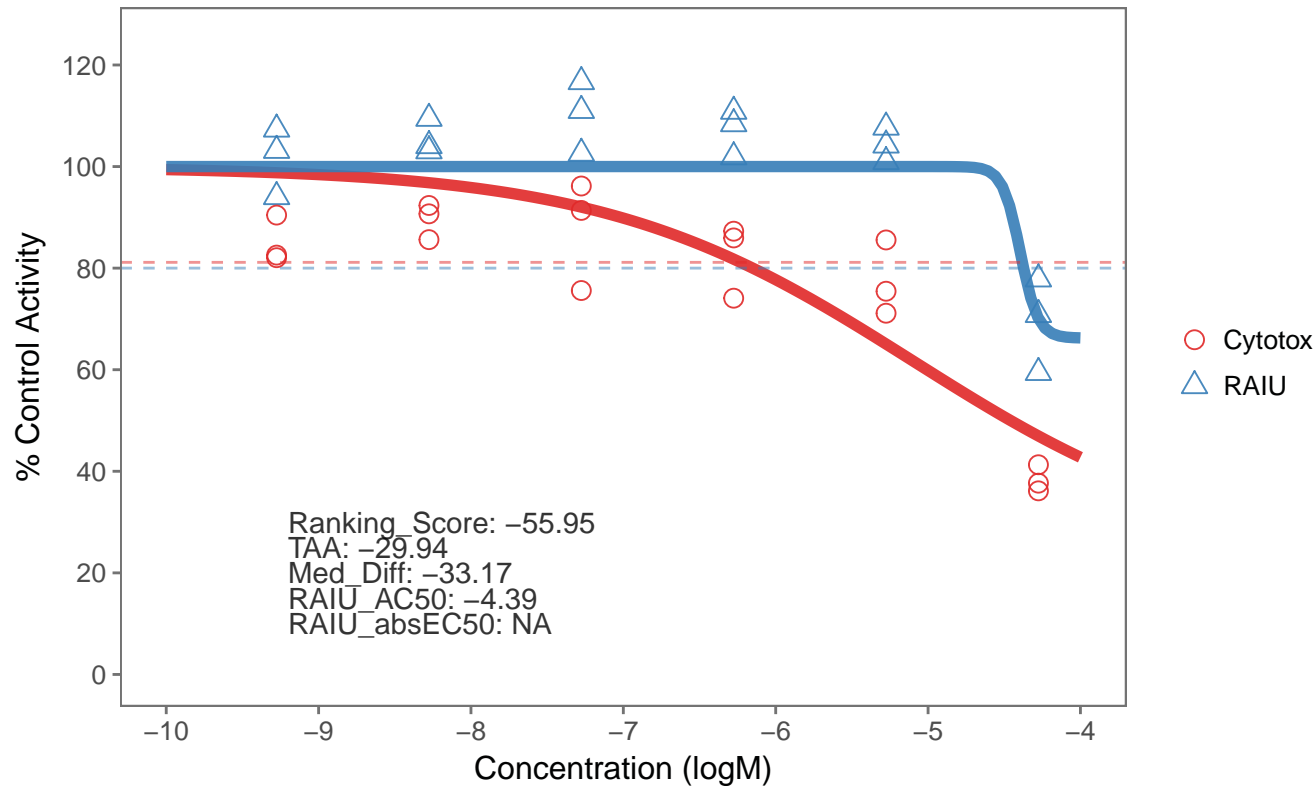

146. SPID: TP0001954E05

NAME: Rhodamine B

CAS NO: 81-88-9

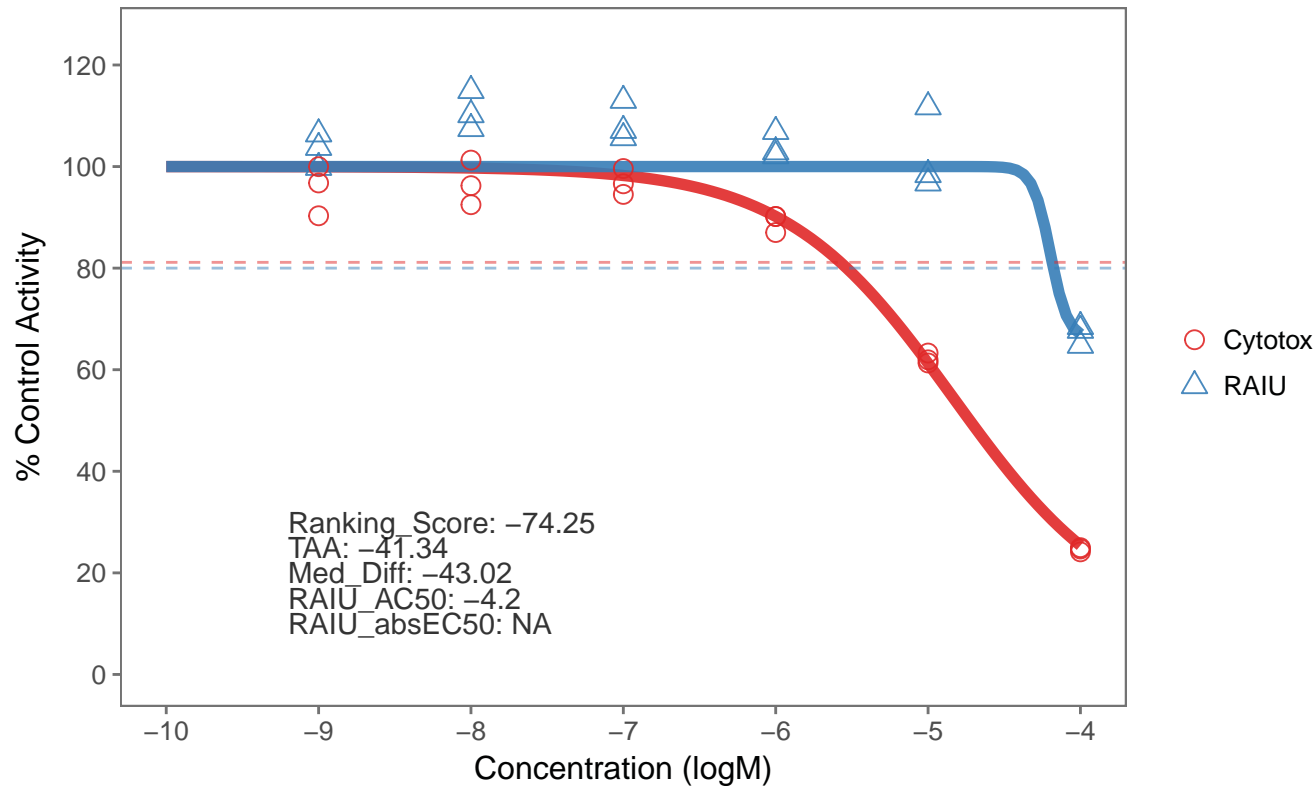

147. SPID: TP0001952A01  
NAME: Procaine hydrochloride  
CAS NO: 51-05-8

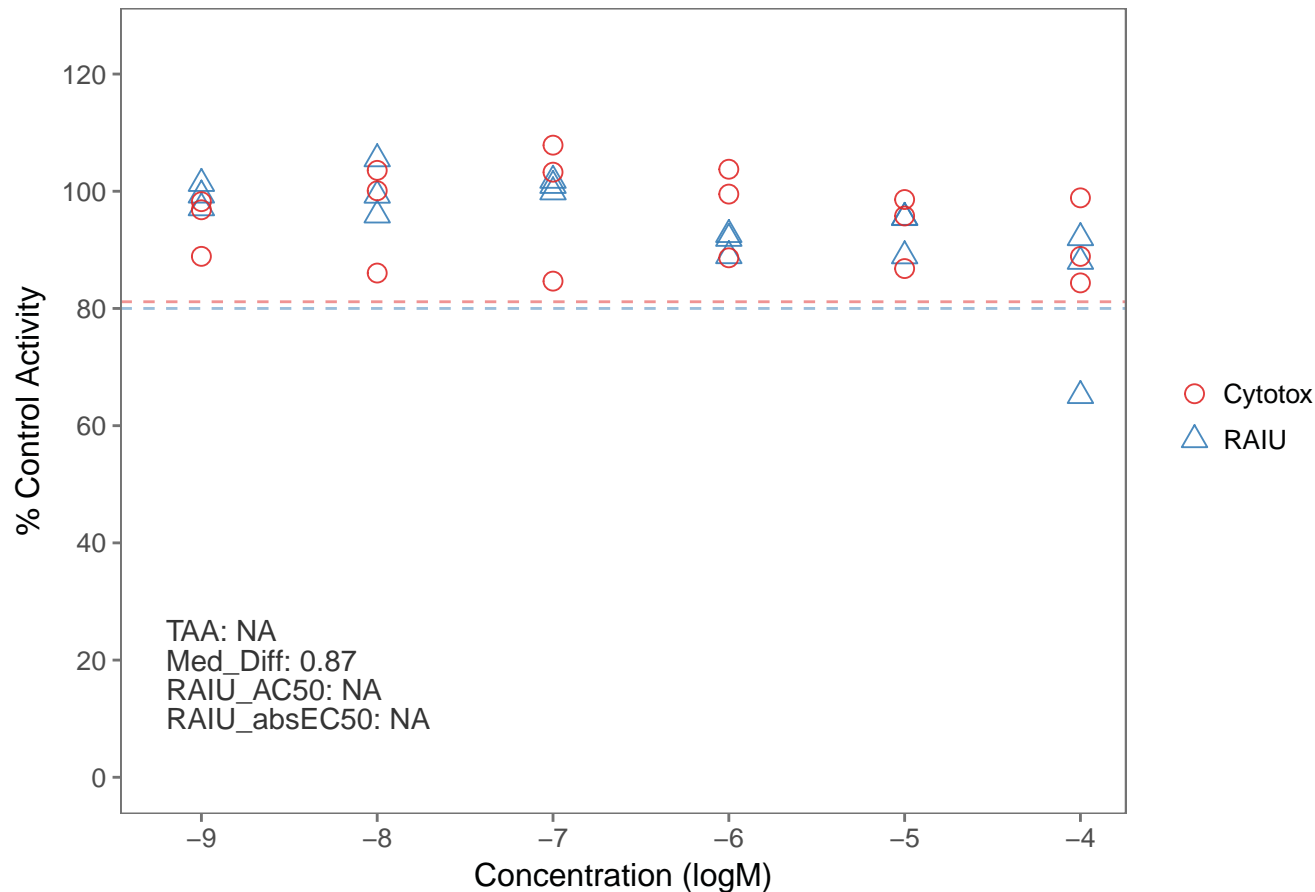

148. SPID: TP0001952D05

NAME: Oxazepam

CAS NO: 604-75-1

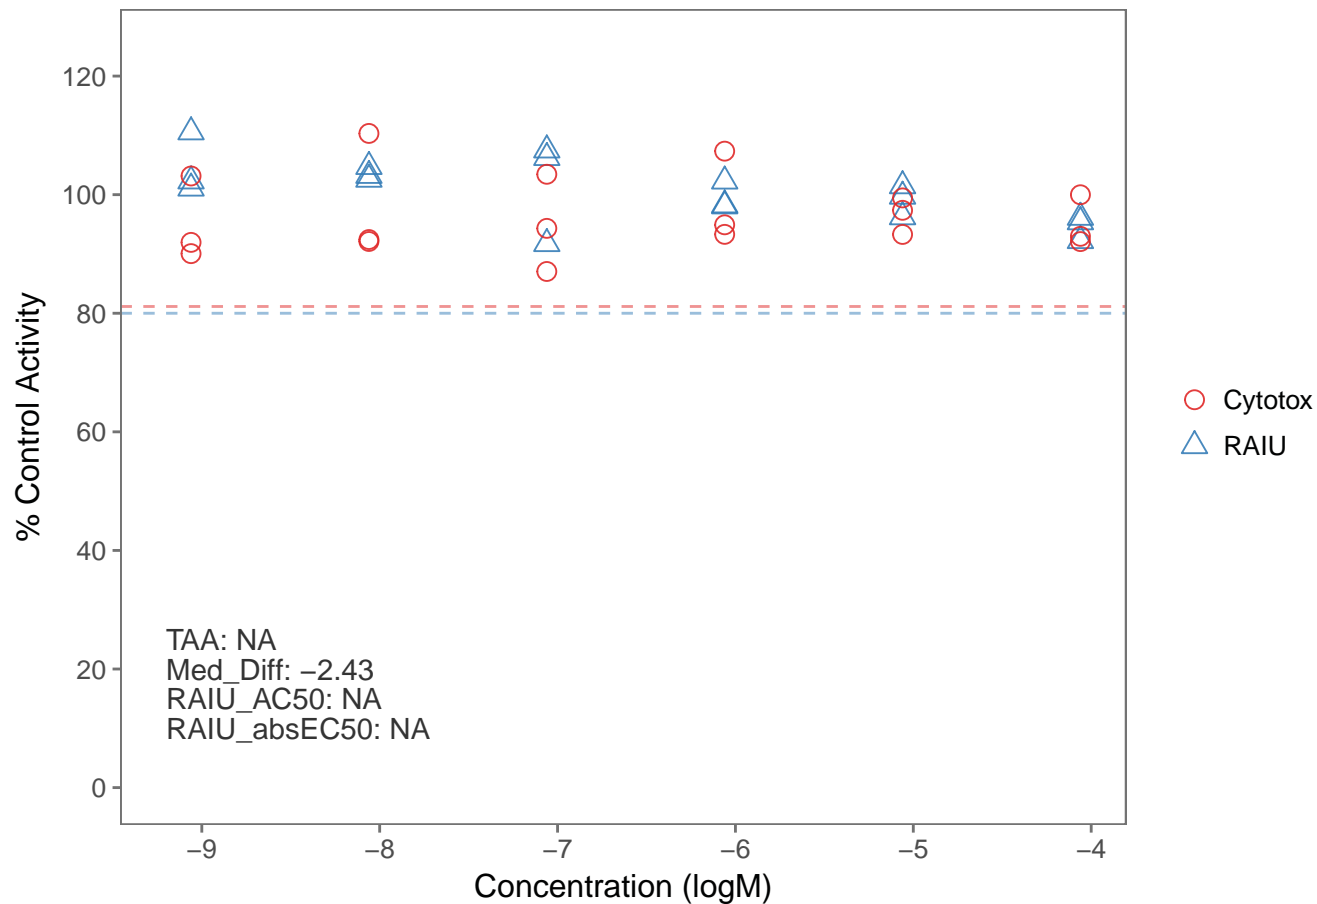

149. SPID: TP0001957C08

NAME: Oxalic acid

CAS NO: 144-62-7

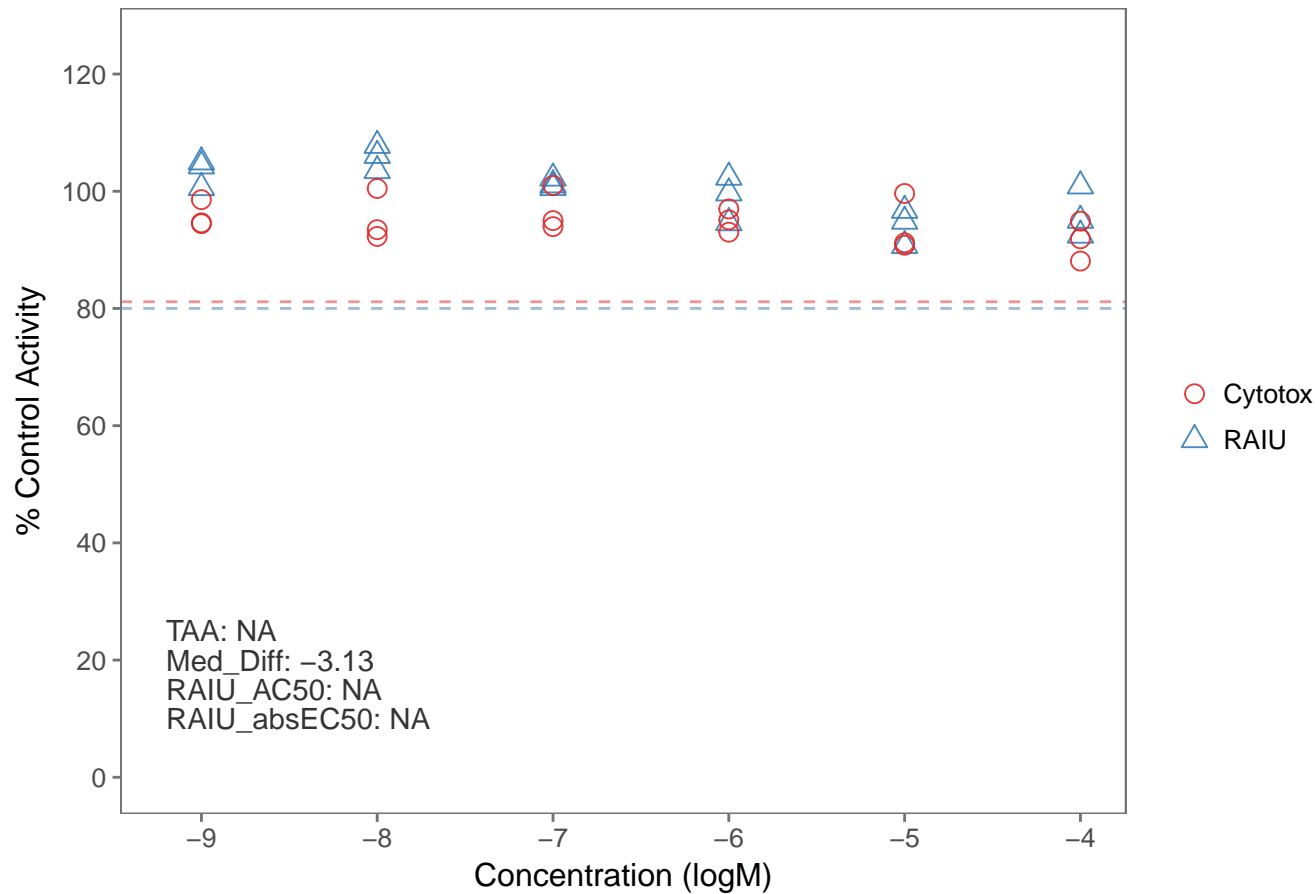

150. SPID: TP0001957E05

NAME: Nonane

CAS NO: 111-84-2

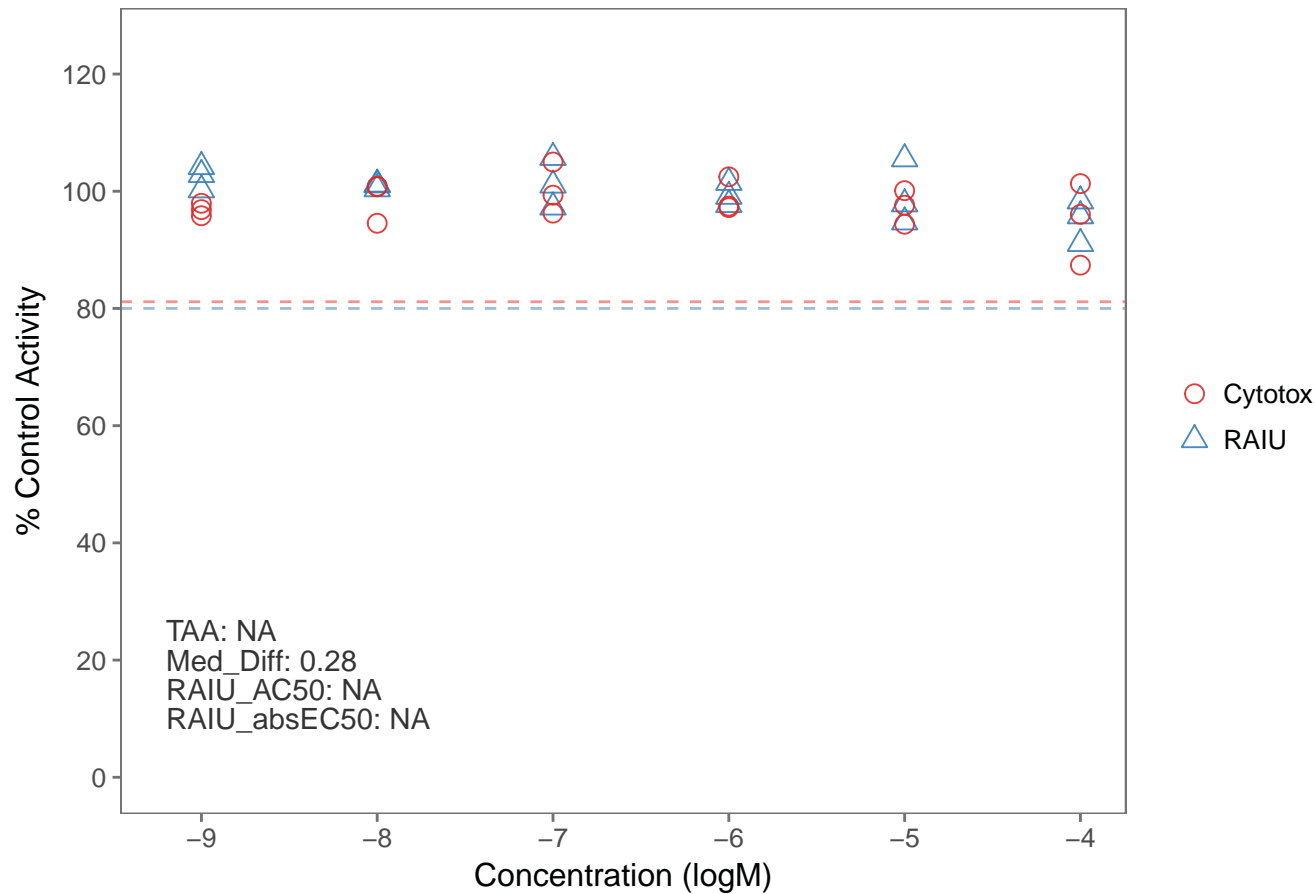

151. SPID: TP0001957F01  
NAME: gamma-Nonanolactone  
CAS NO: 104-61-0

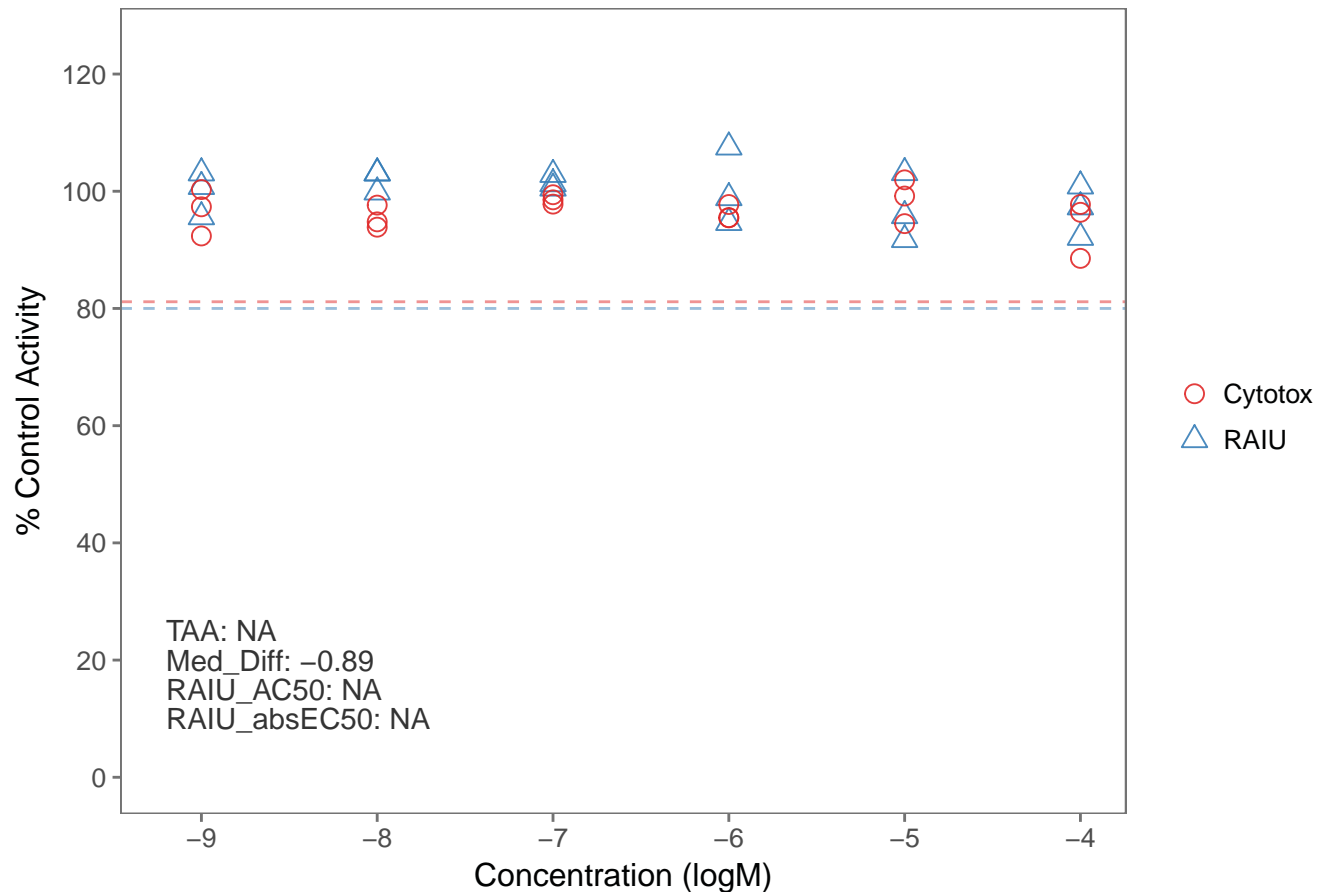

152. SPID: TP0001957F05

NAME: Lufenuron

CAS NO: 103055-07-8

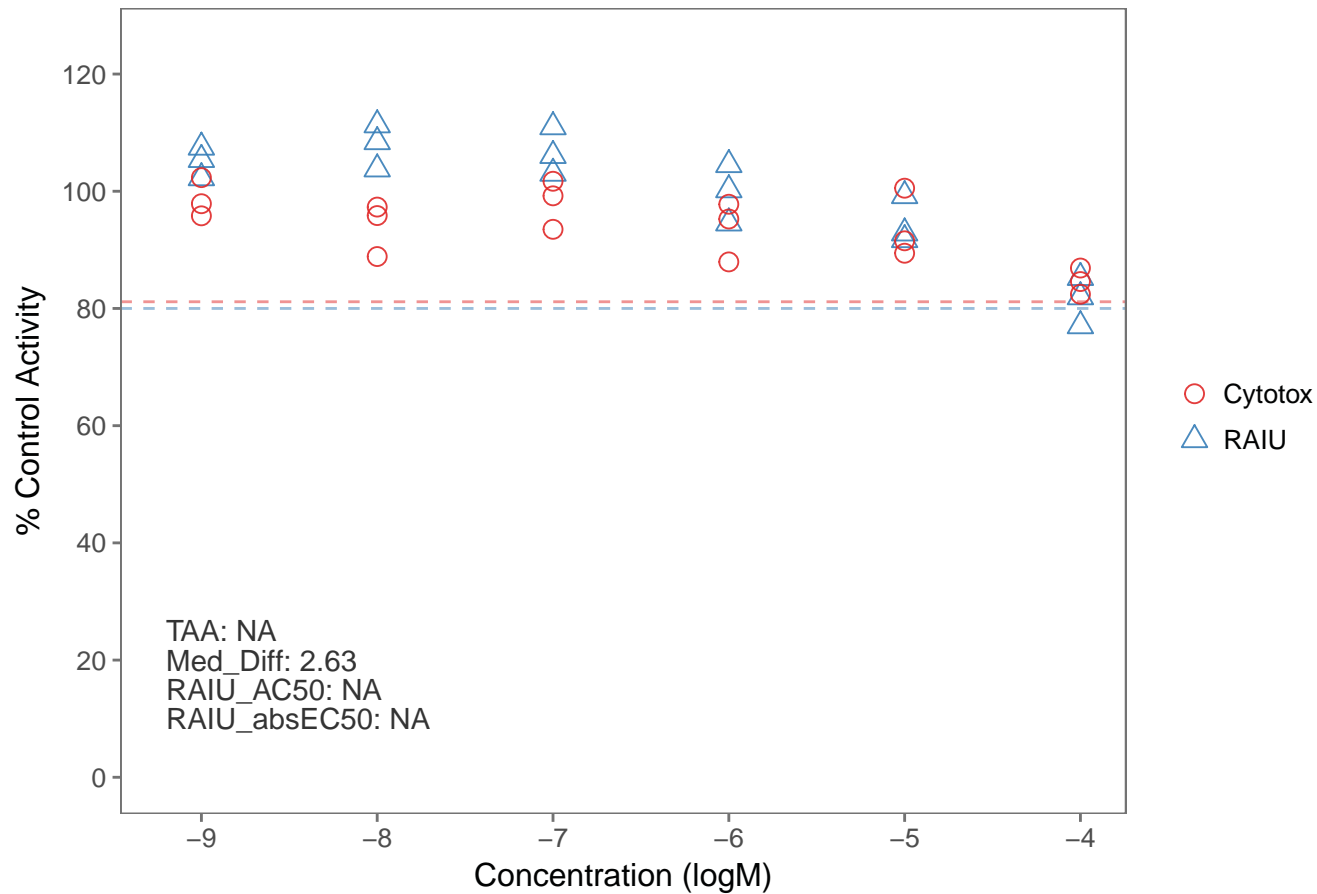



153. SPID: TP0001957G07  
NAME: Diphenyl phosphate  
CAS NO: 838-85-7

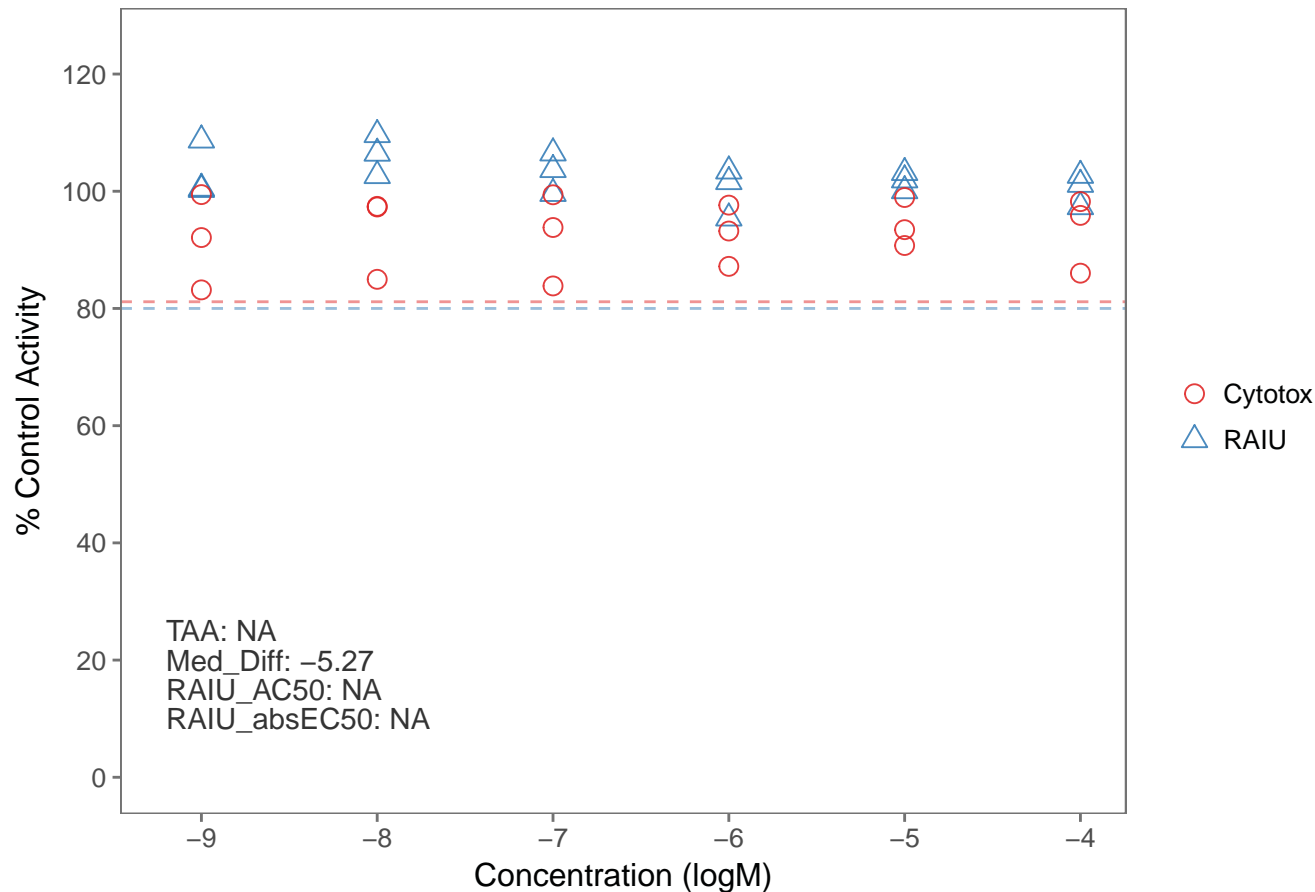

154. SPID: TP0001958A01

NAME: tert-Butyl acetate

CAS NO: 540-88-5

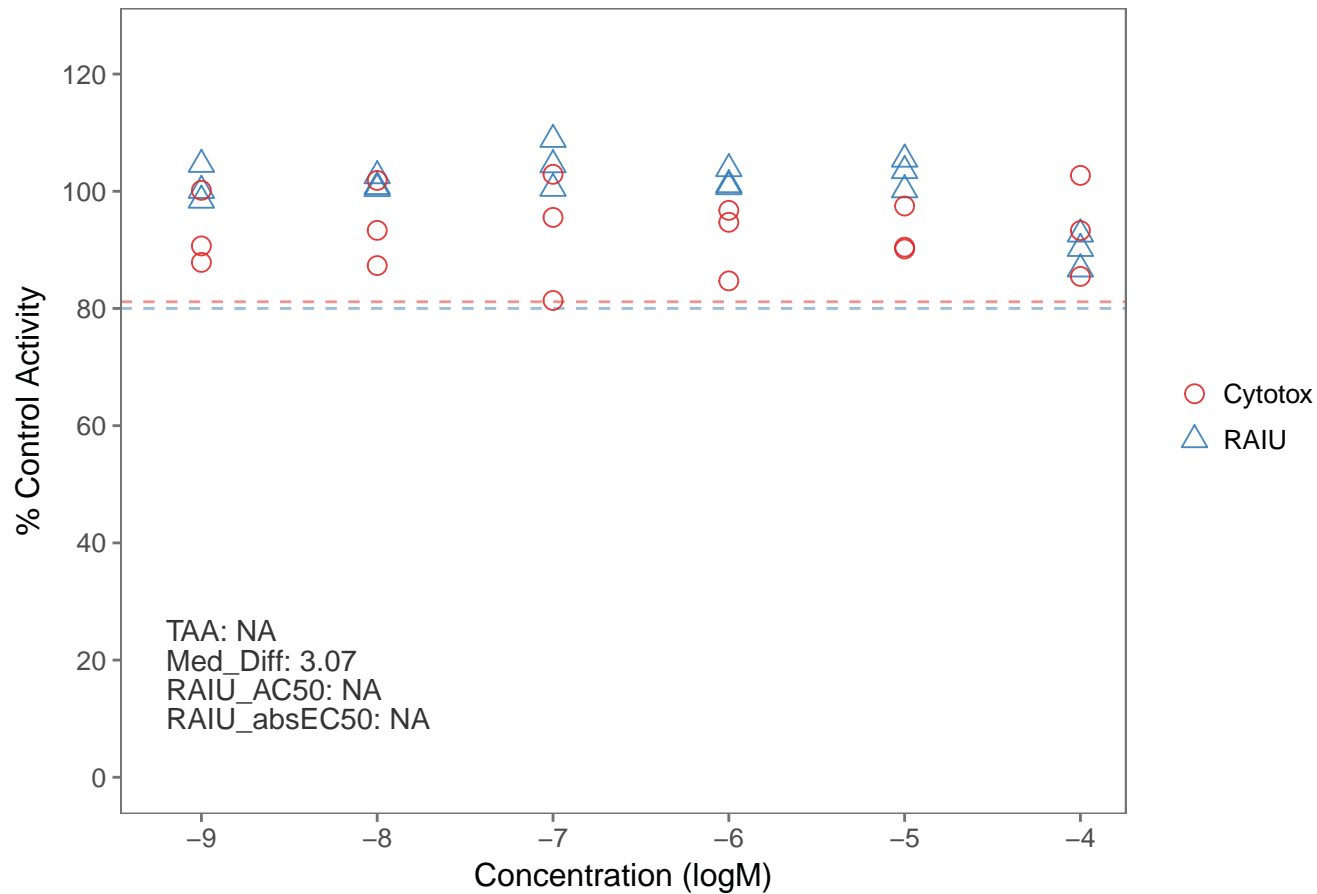

155. SPID: TP0001958C08

NAME: 3-Methylpyridine

CAS NO: 108-99-6

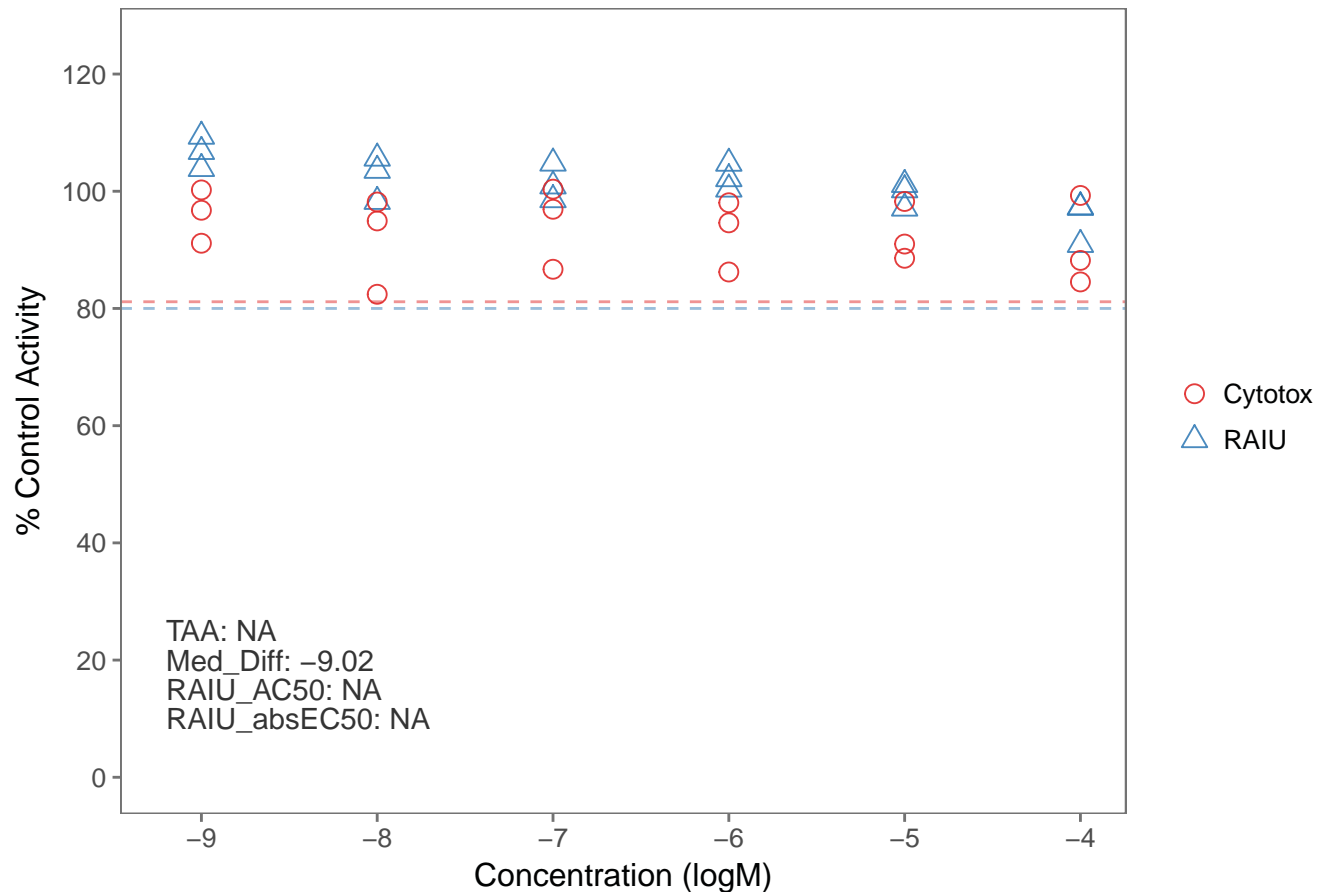

156. SPID: TP0001958D01  
NAME: Dibenz(a,h)anthracene  
CAS NO: 53-70-3

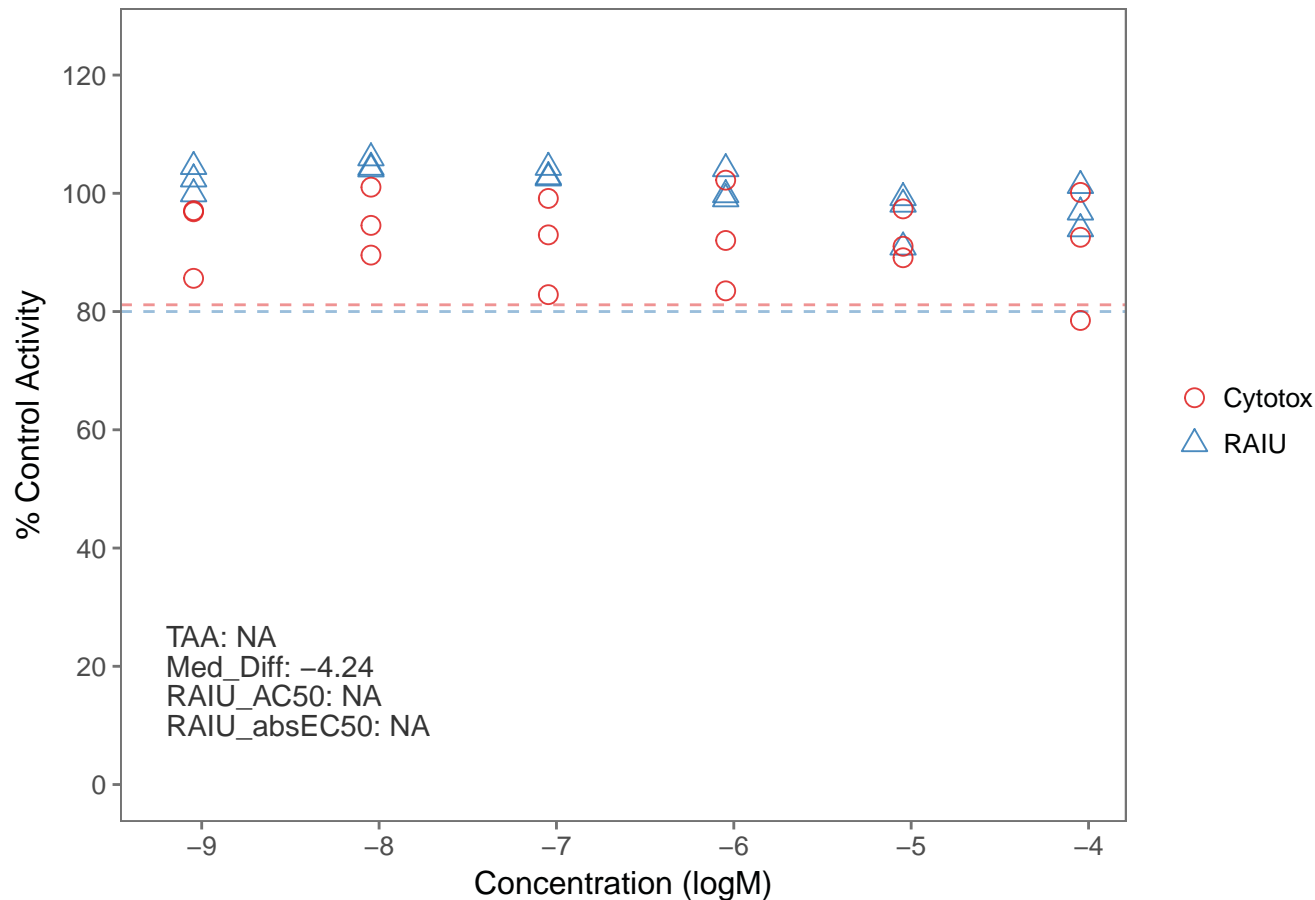

157. SPID: TP0001958D02

NAME: Linolenic acid

CAS NO: 463-40-1

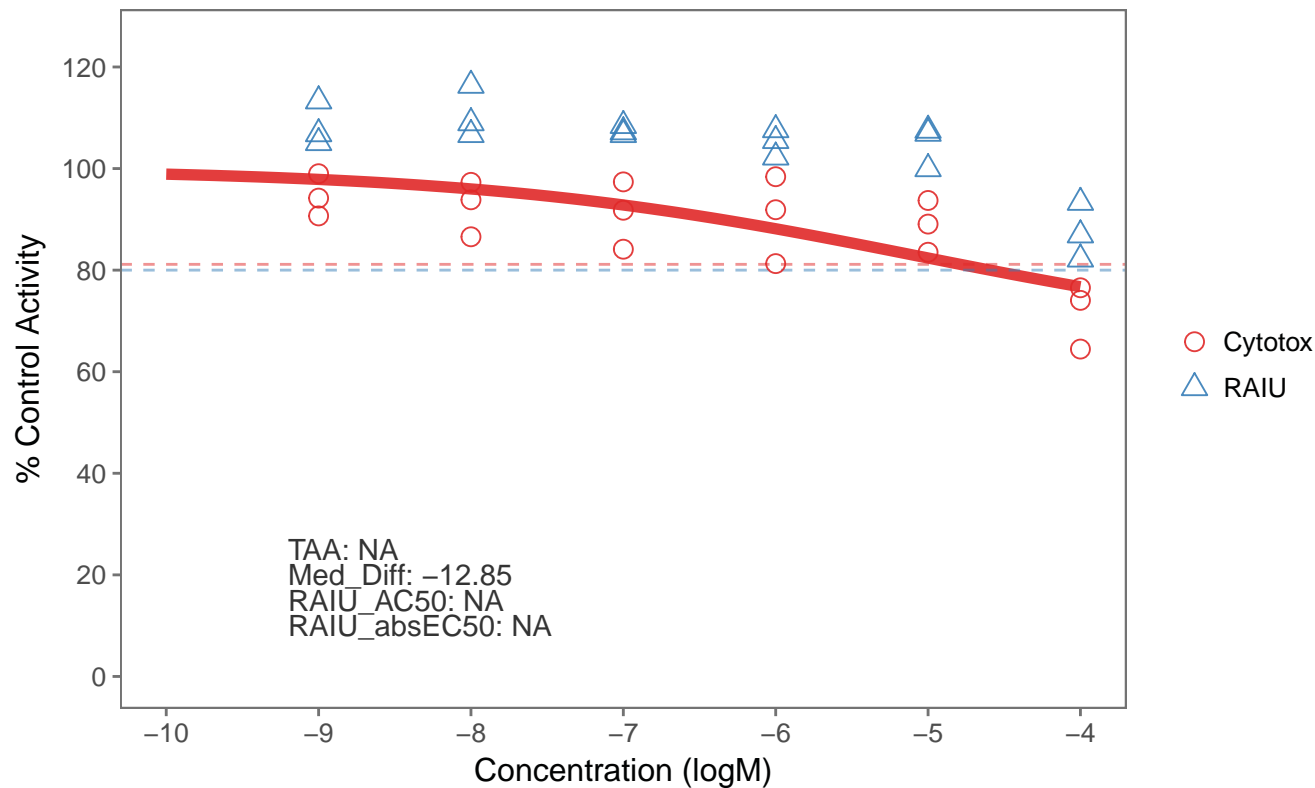

158. SPID: TP0001958D09  
NAME: 2-(Phenylmethylene)-heptanal  
CAS NO: 122-40-7

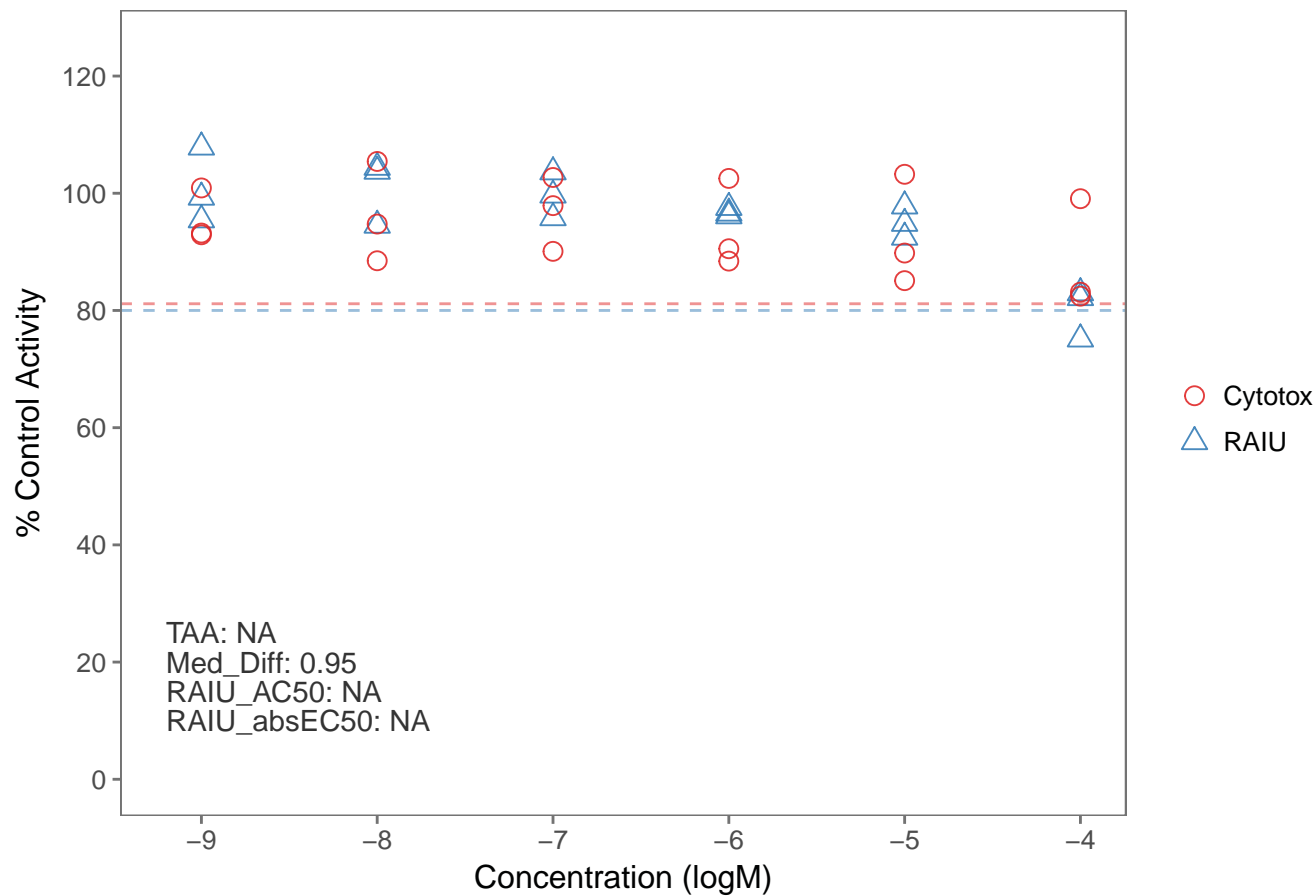

159. SPID: TP0001958E01  
NAME: Magnesium dibenzoate  
CAS NO: 553-70-8

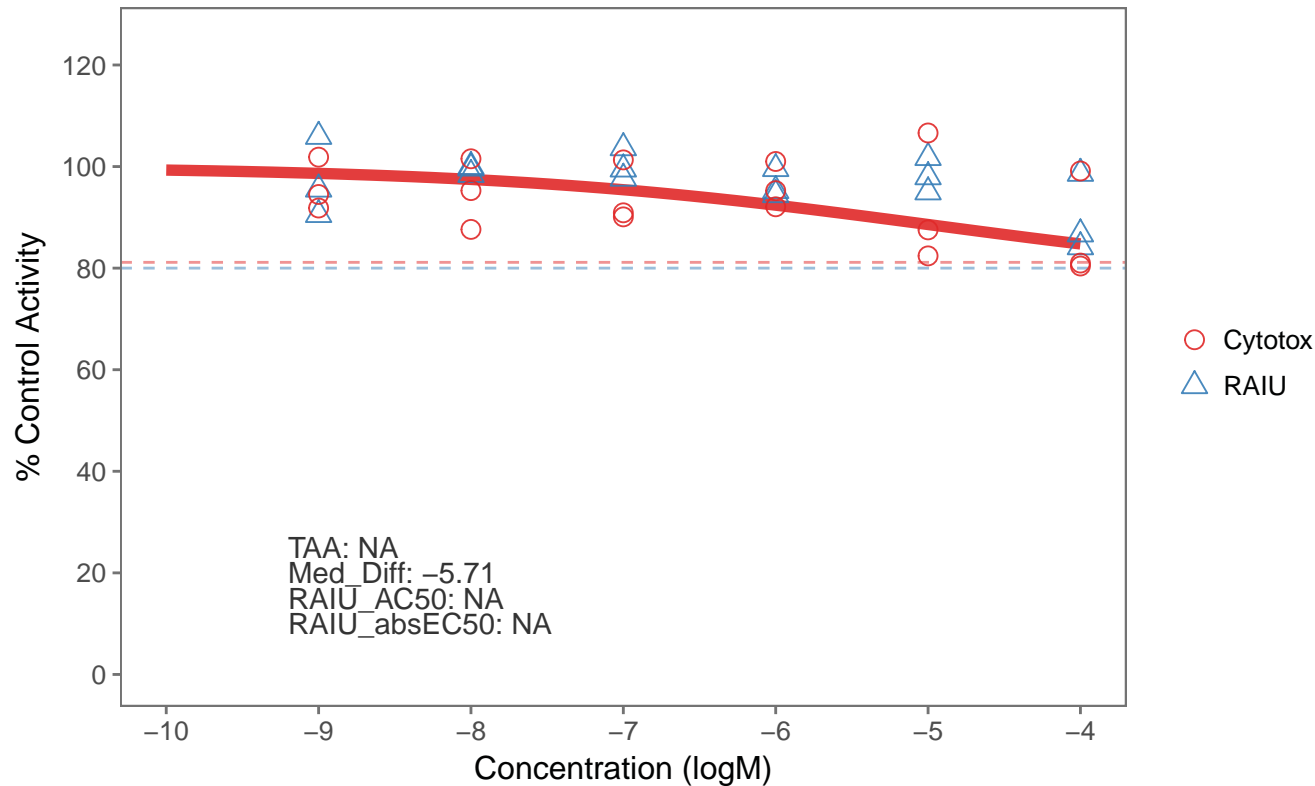

160. SPID: TP0001958E03

NAME: Halofenozide

CAS NO: 112226-61-6

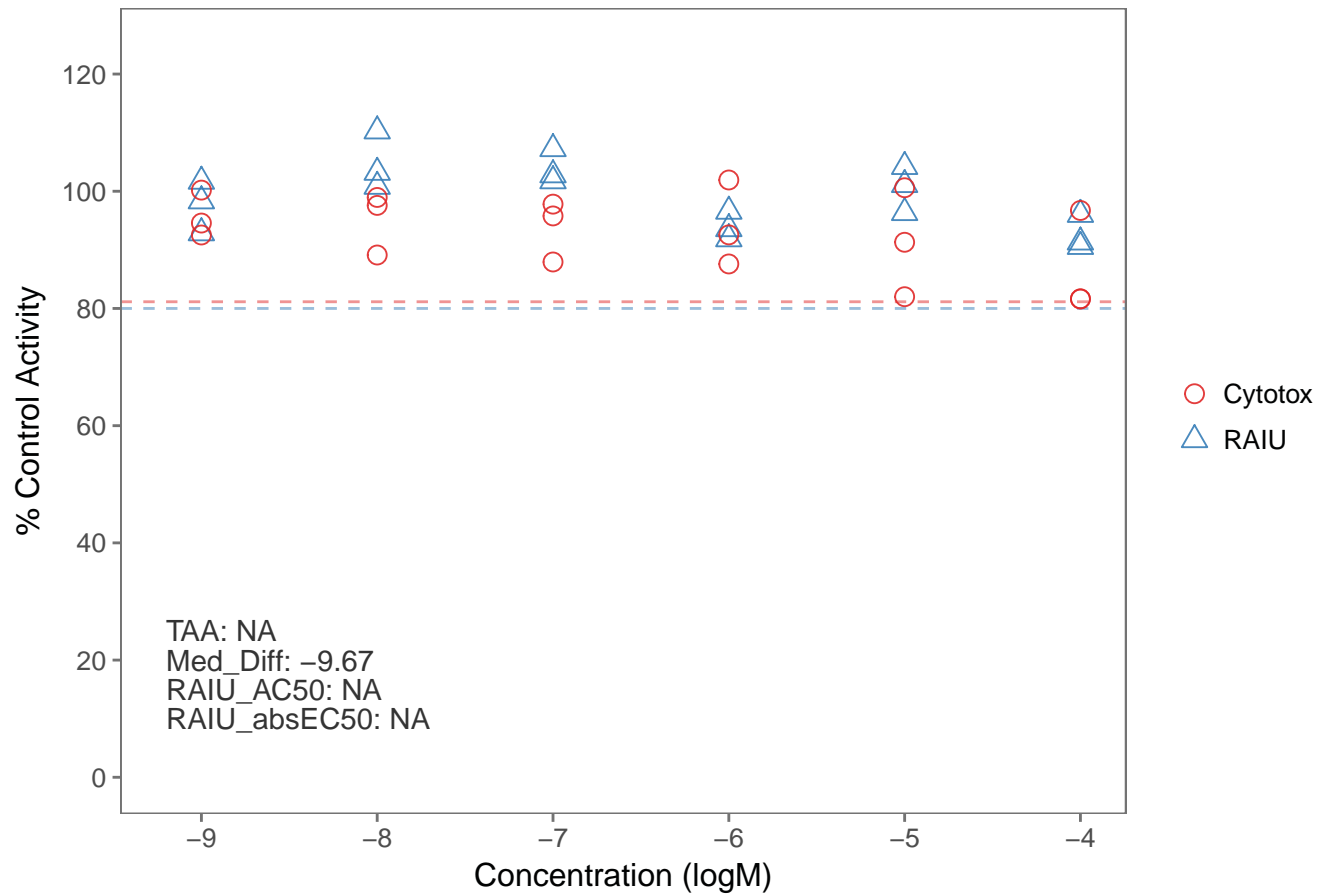



161. SPID: TP0001958E07

NAME: Phenothrin

CAS NO: 26002-80-2

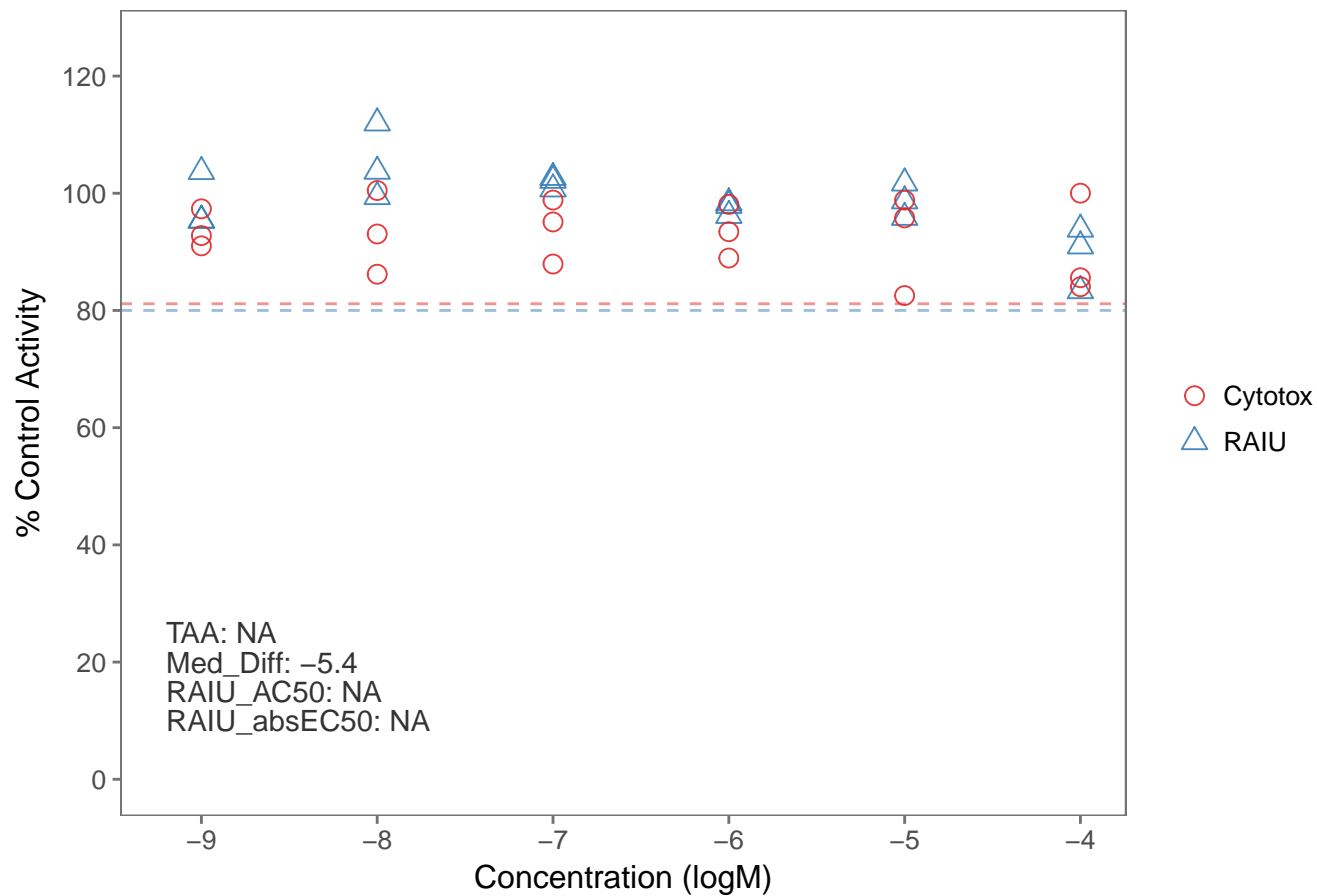

162. SPID: TP0001958F01

NAME: Tromethamine

CAS NO: 77-86-1

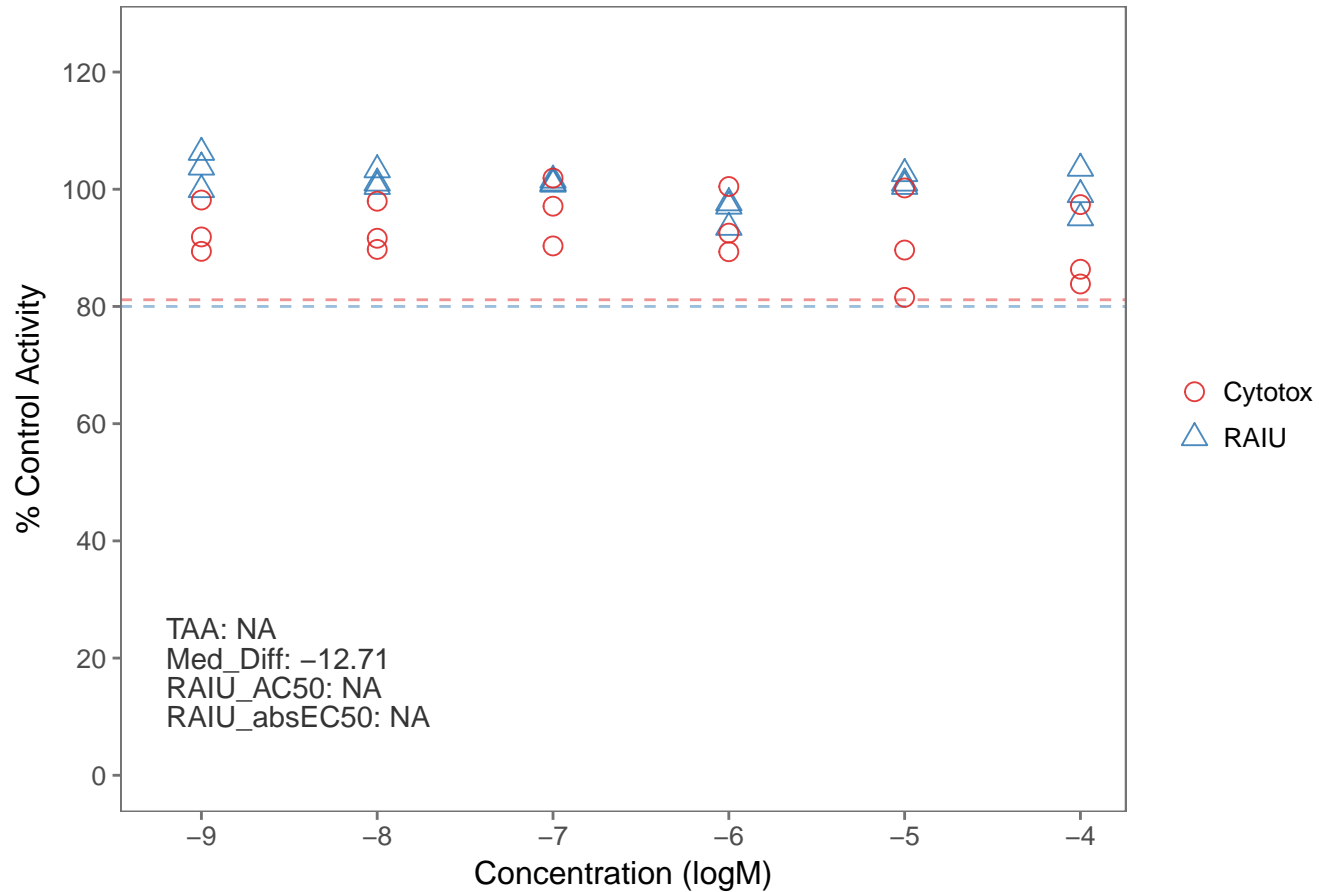

163. SPID: TP0001958F09  
NAME: Atorvastatin calcium  
CAS NO: 134523-03-8

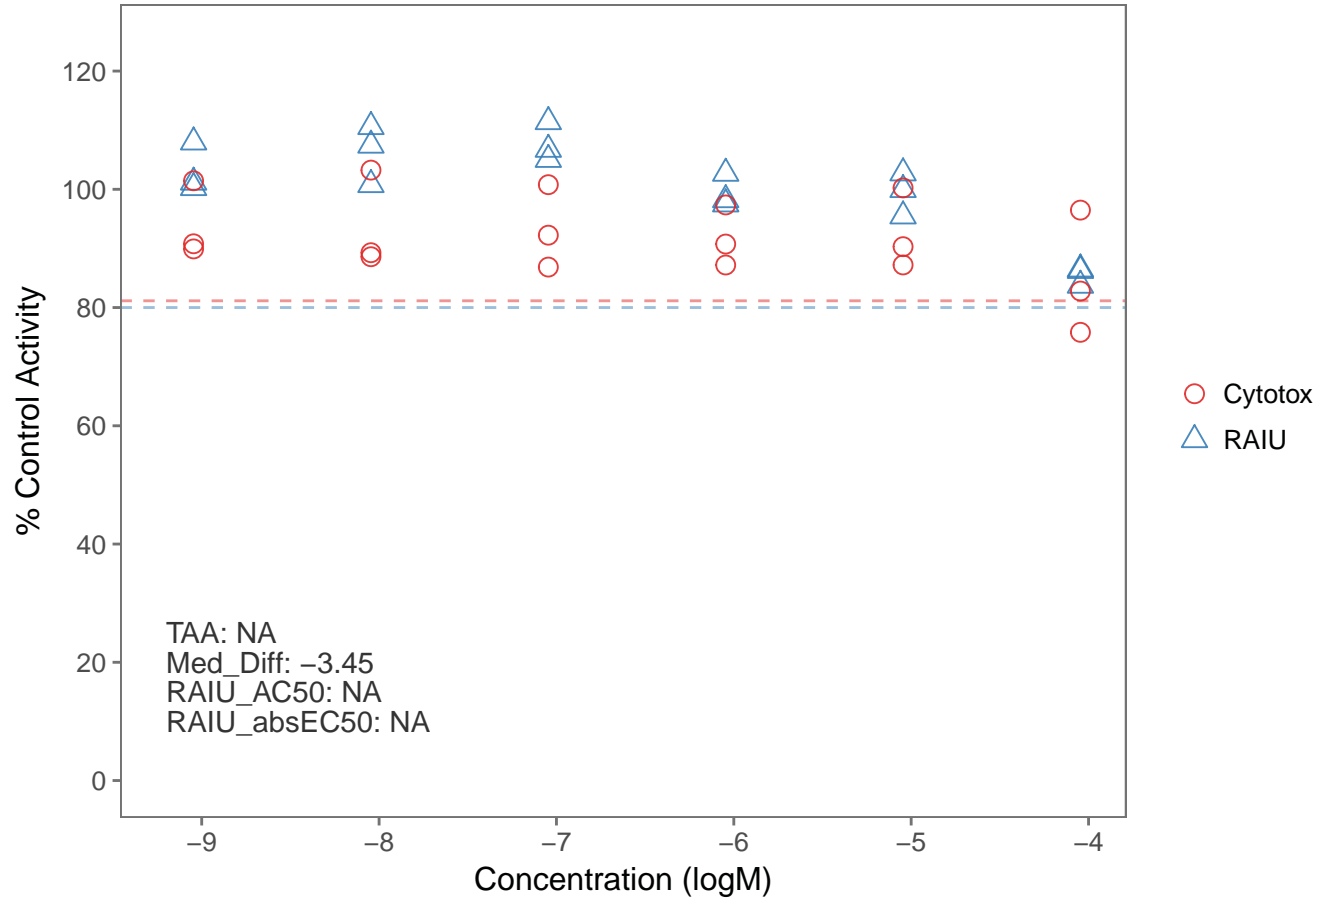

164. SPID: TP0001958G11  
NAME: (Dicyclopentadienyloxy)ethyl methacrylate  
CAS NO: 68169-03-9

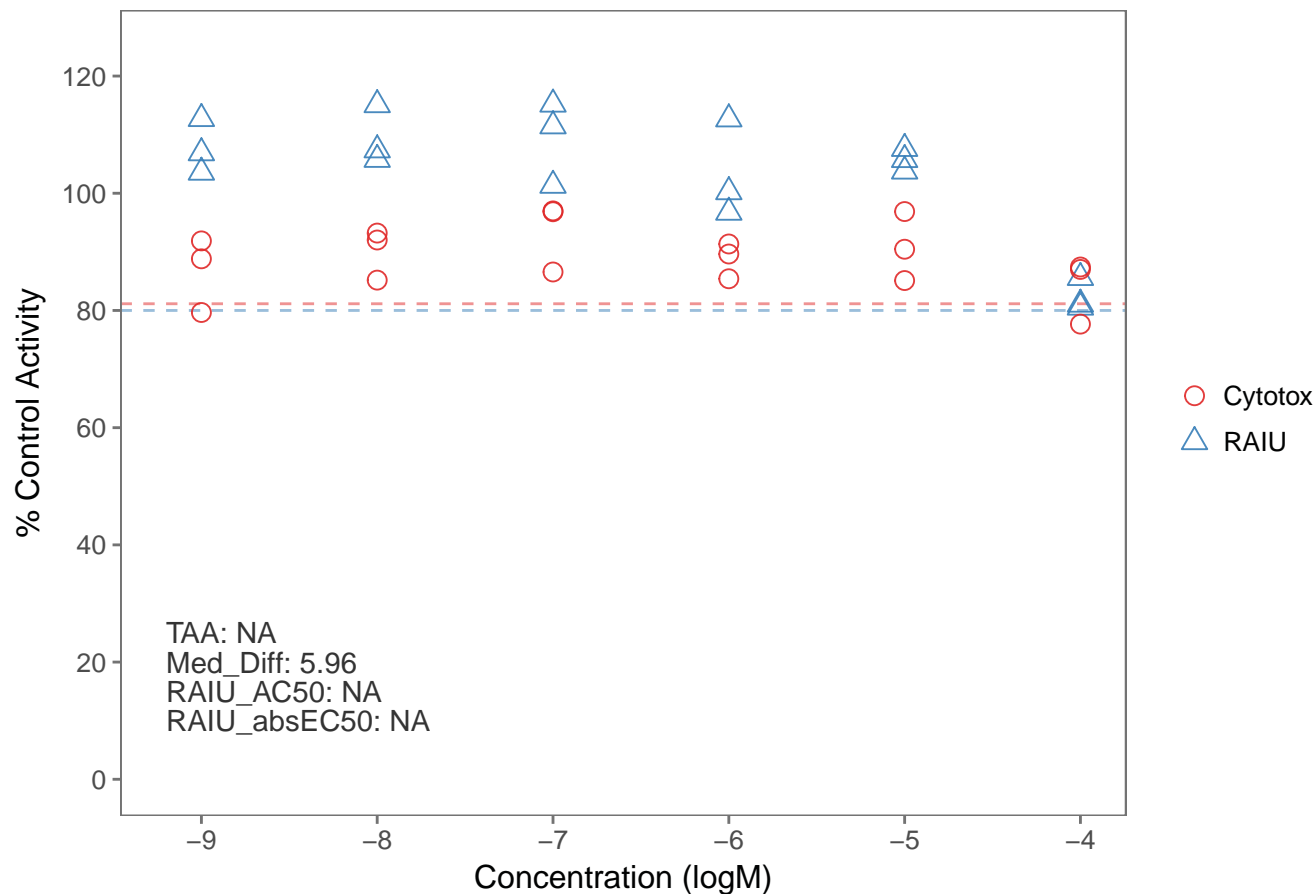

165. SPID: TP0001964C11

NAME: 4-Ethoxyaniline

CAS NO: 156-43-4

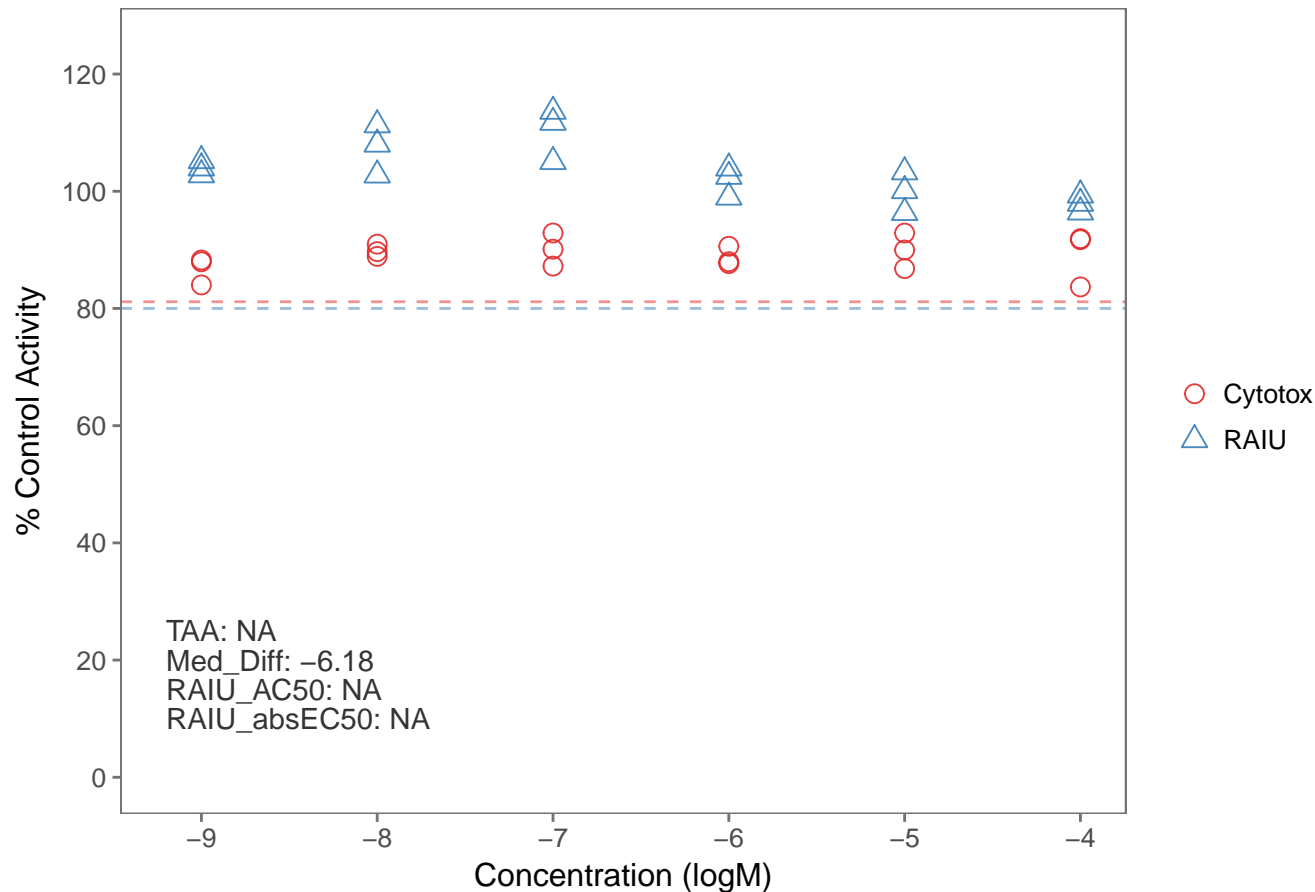

166. SPID: TP0001964E01  
NAME: Trimethoxyphenylsilane  
CAS NO: 2996-92-1

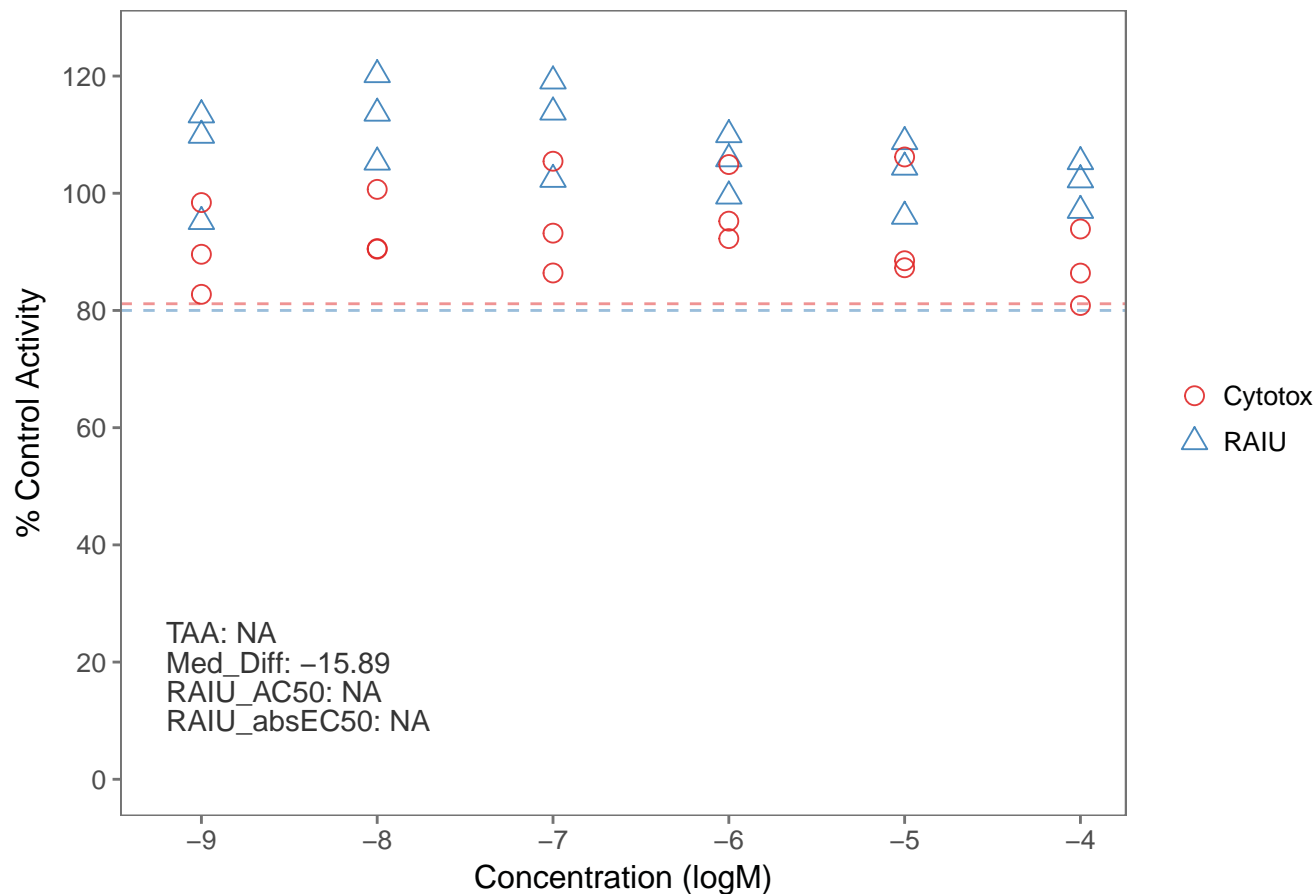

167. SPID: TP0001964E02  
NAME: gamma-Cyclodextrin  
CAS NO: 17465-86-0

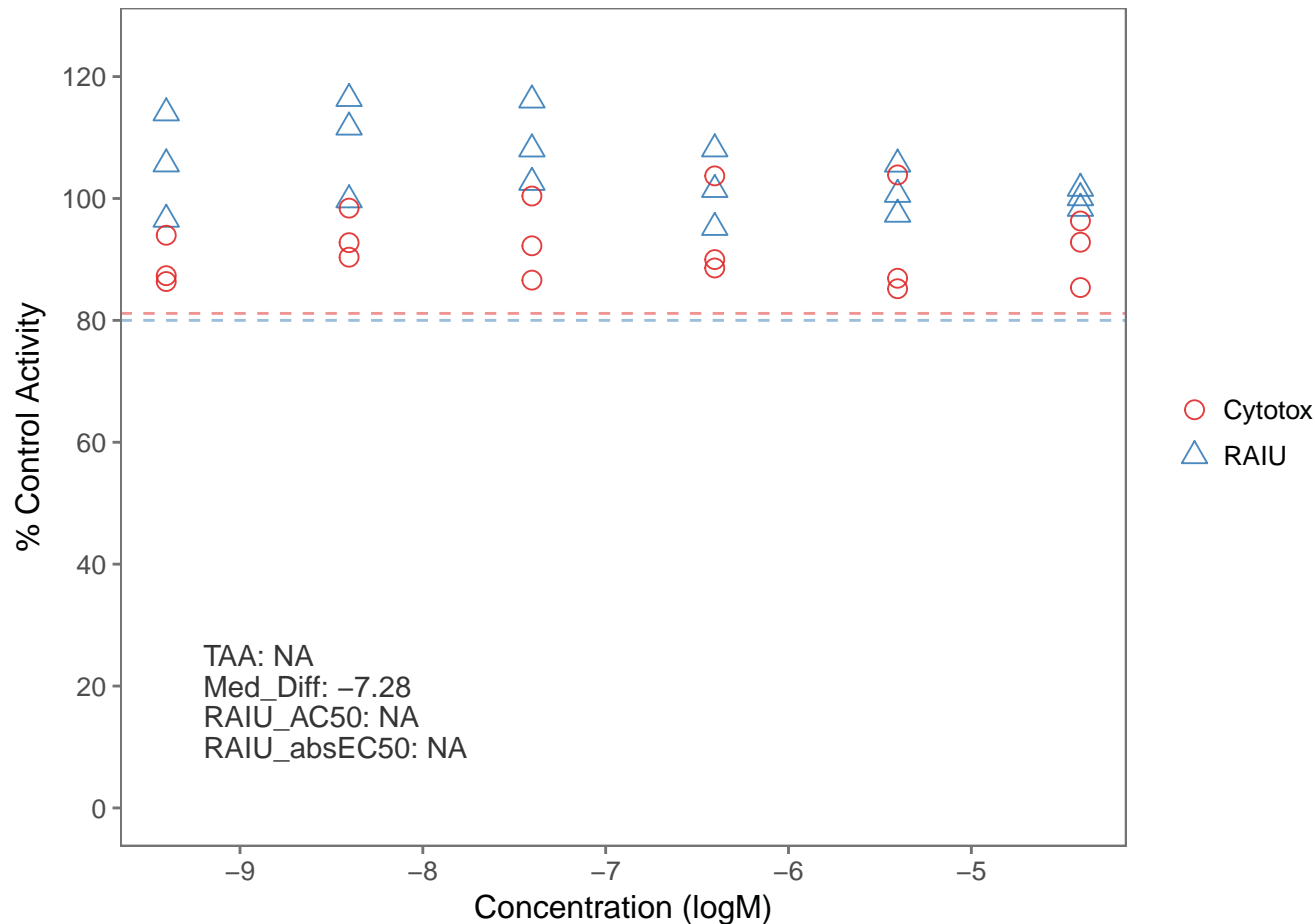

168. SPID: TP0001964E07  
NAME: Diphenylmercury(II)  
CAS NO: 587-85-9

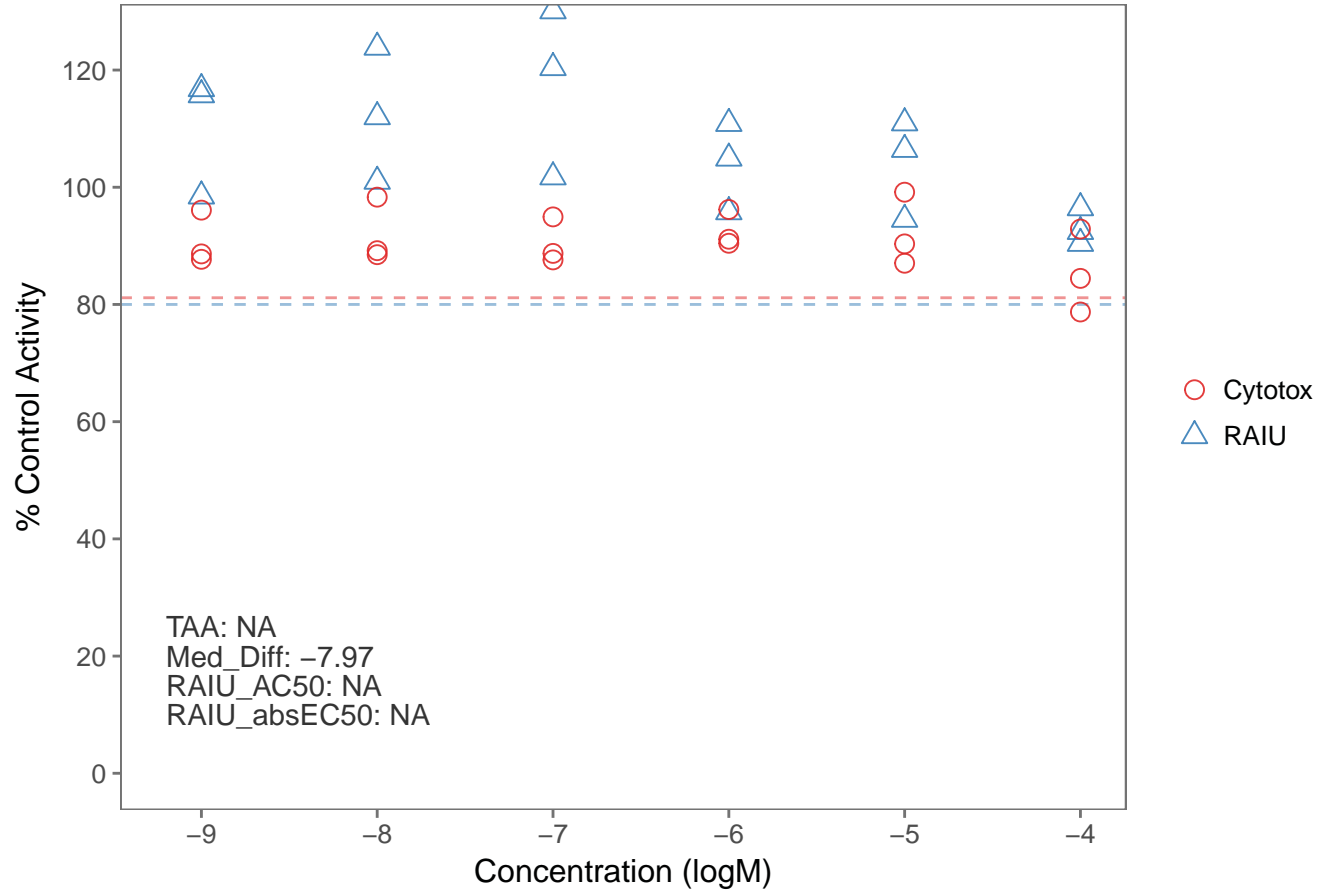



169. SPID: TP0001964F01

NAME: Benzoin

CAS NO: 119-53-9

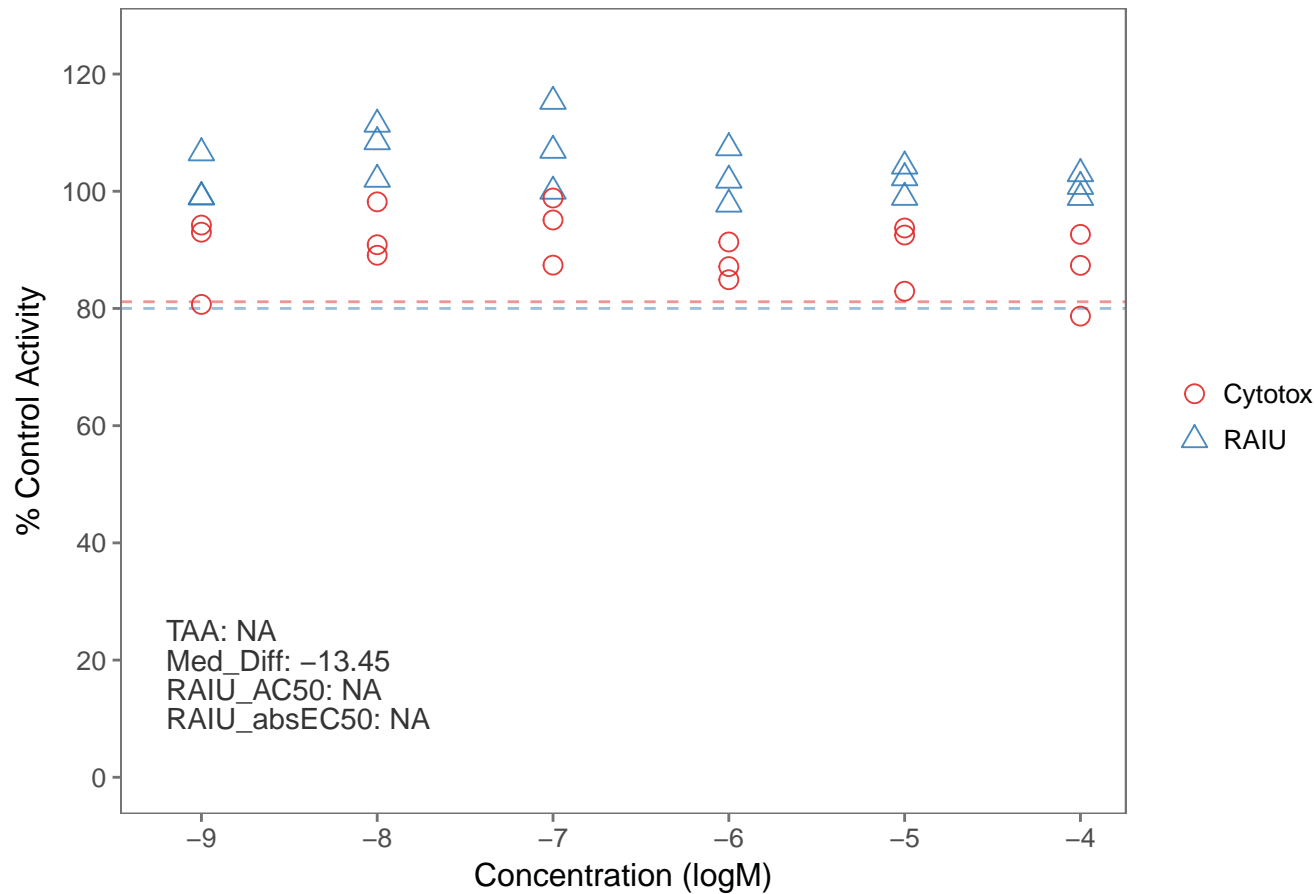

170. SPID: TP0001964G01

NAME: Dodecylphenol

CAS NO: 27193-86-8

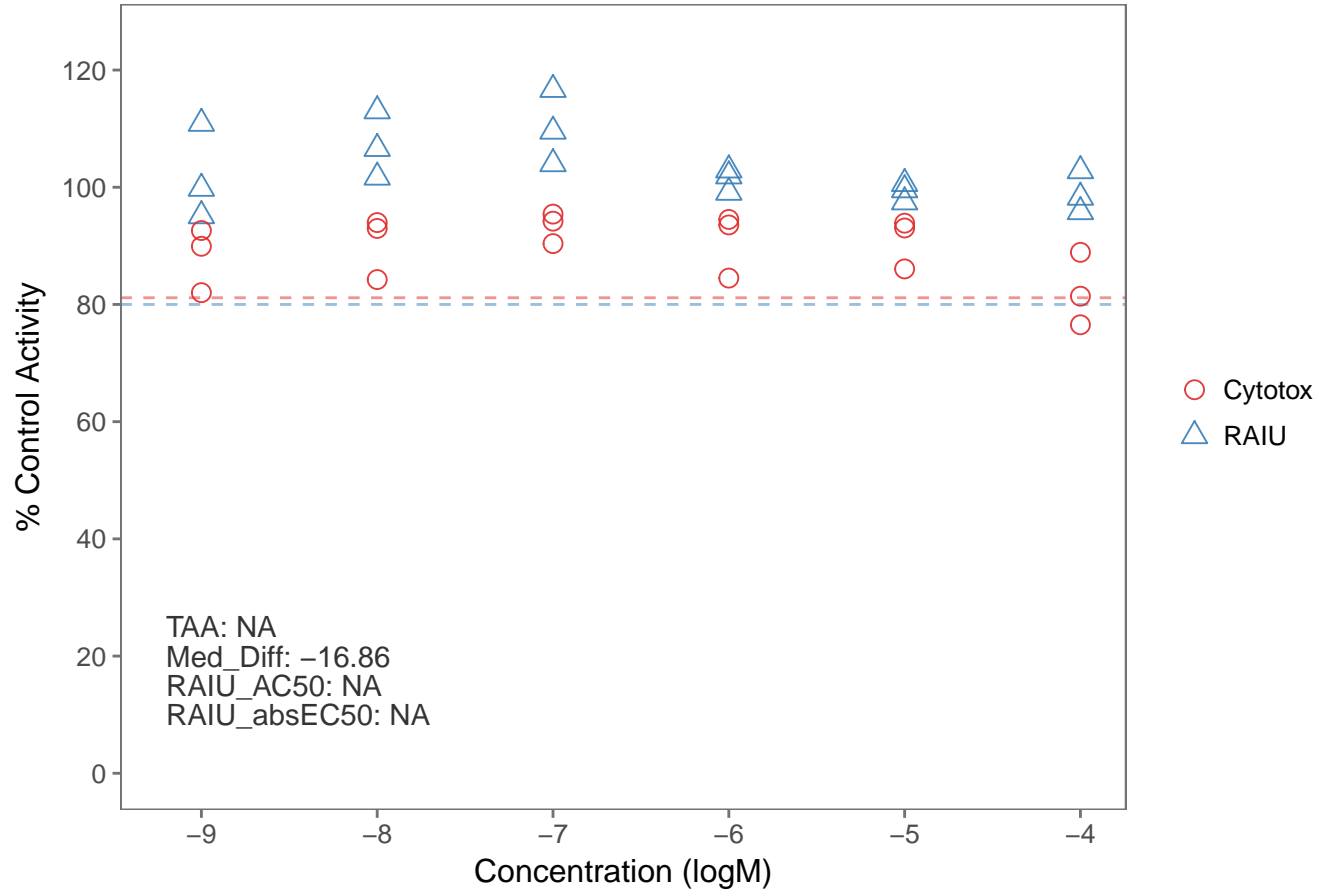

171. SPID: TP0001959C01  
NAME: 2,4,6-Tribromophenol  
CAS NO: 118-79-6

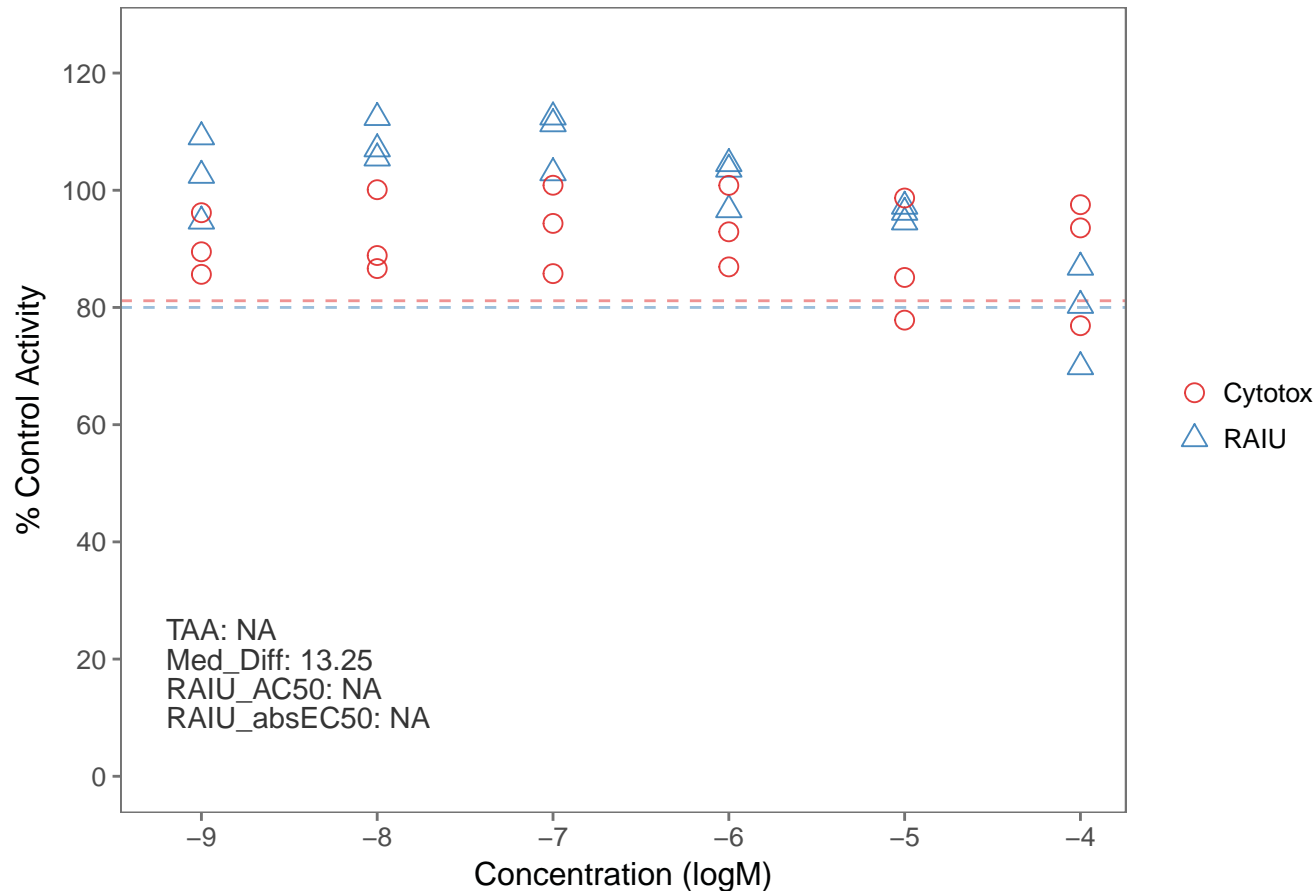

172. SPID: TP0001959C05

NAME: Haloxyfop-methyl

CAS NO: 69806-40-2

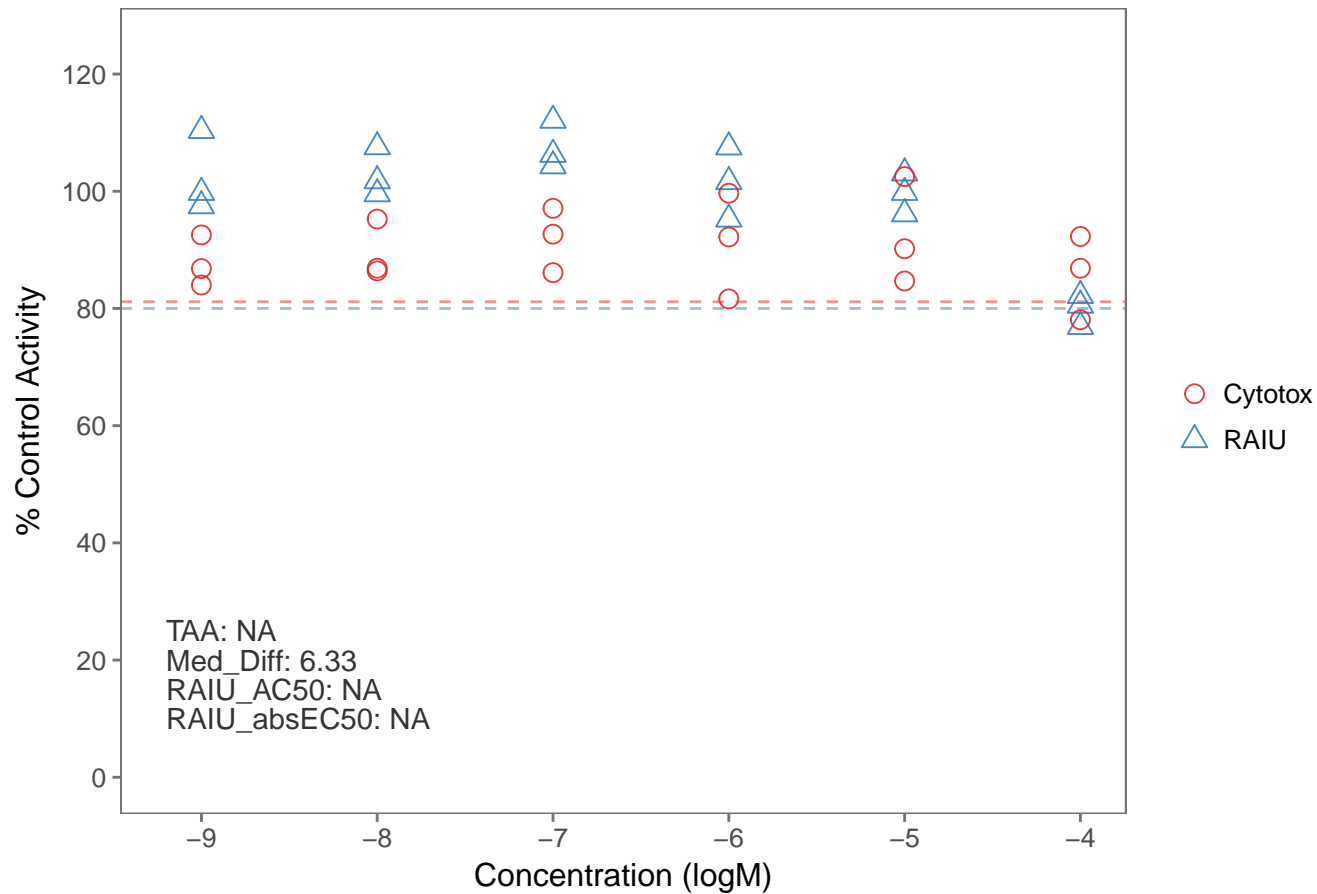

173. SPID: TP0001959D01  
NAME: 2-Ethylhexyl diphenyl phosphate  
CAS NO: 1241-94-7

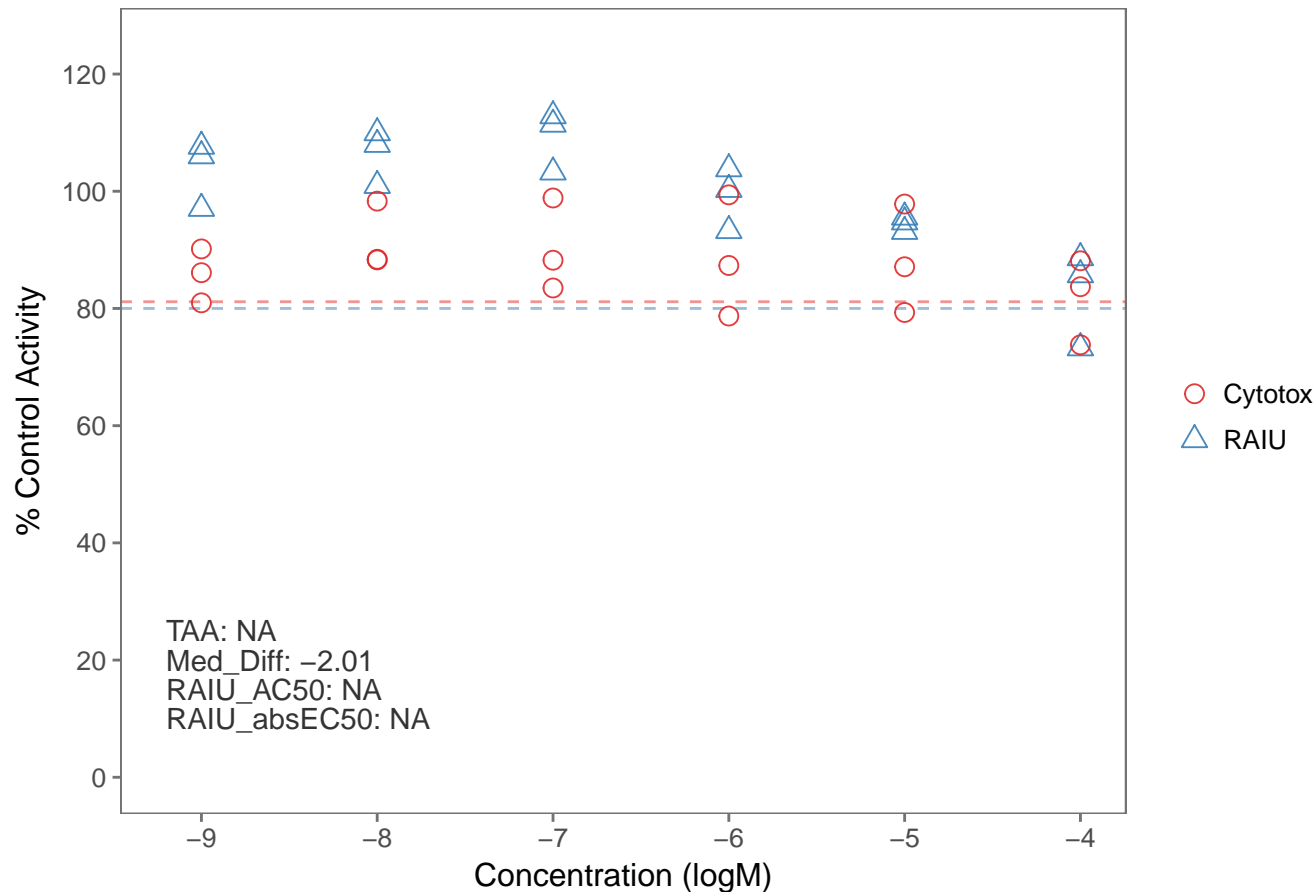

174. SPID: TP0001959D09

NAME: Propachlor

CAS NO: 1918-16-7

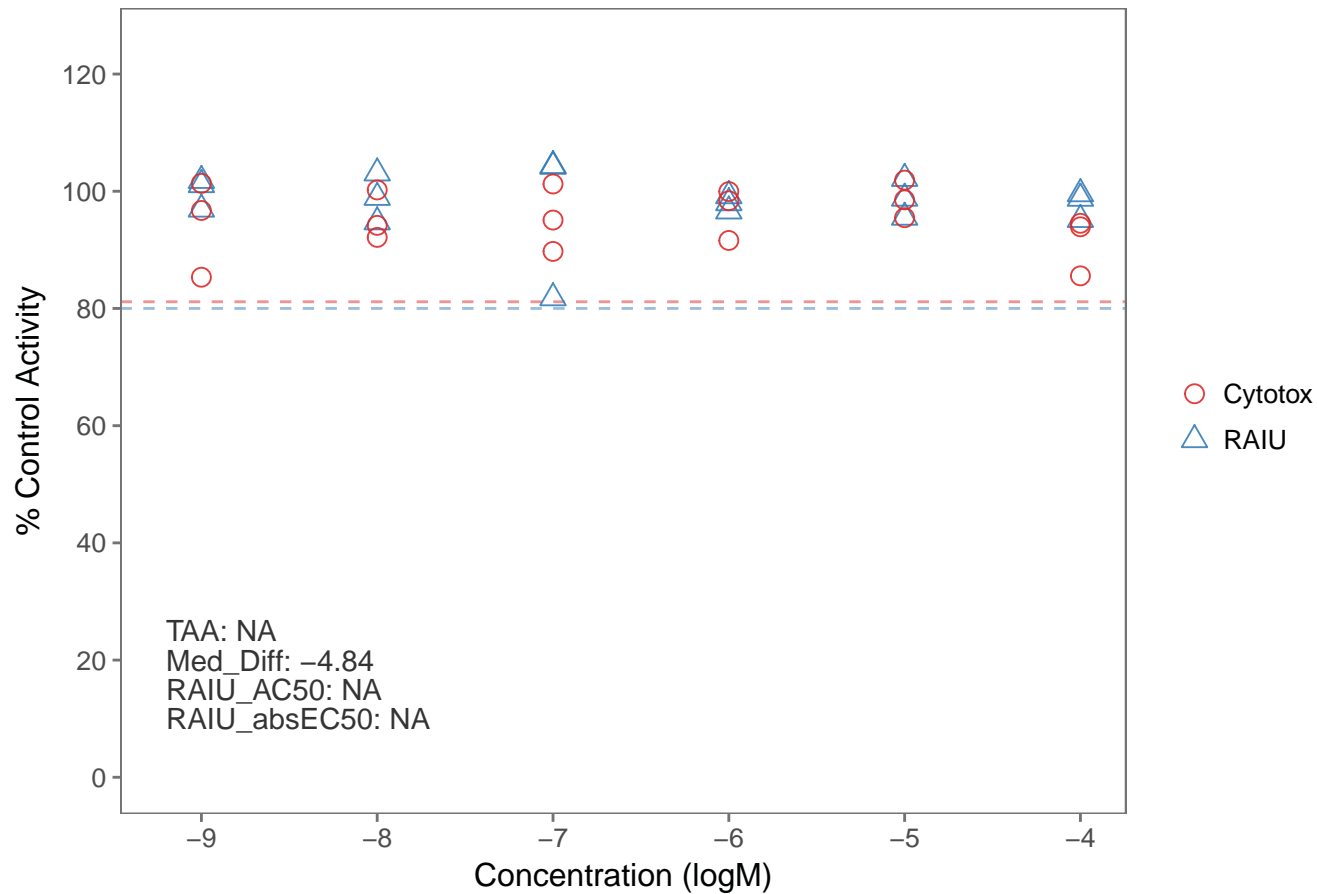

175. SPID: TP0001959F02  
NAME: 2-(8-Heptadecenyl)-2-imidazoline-1-ethanol  
CAS NO: 95-38-5

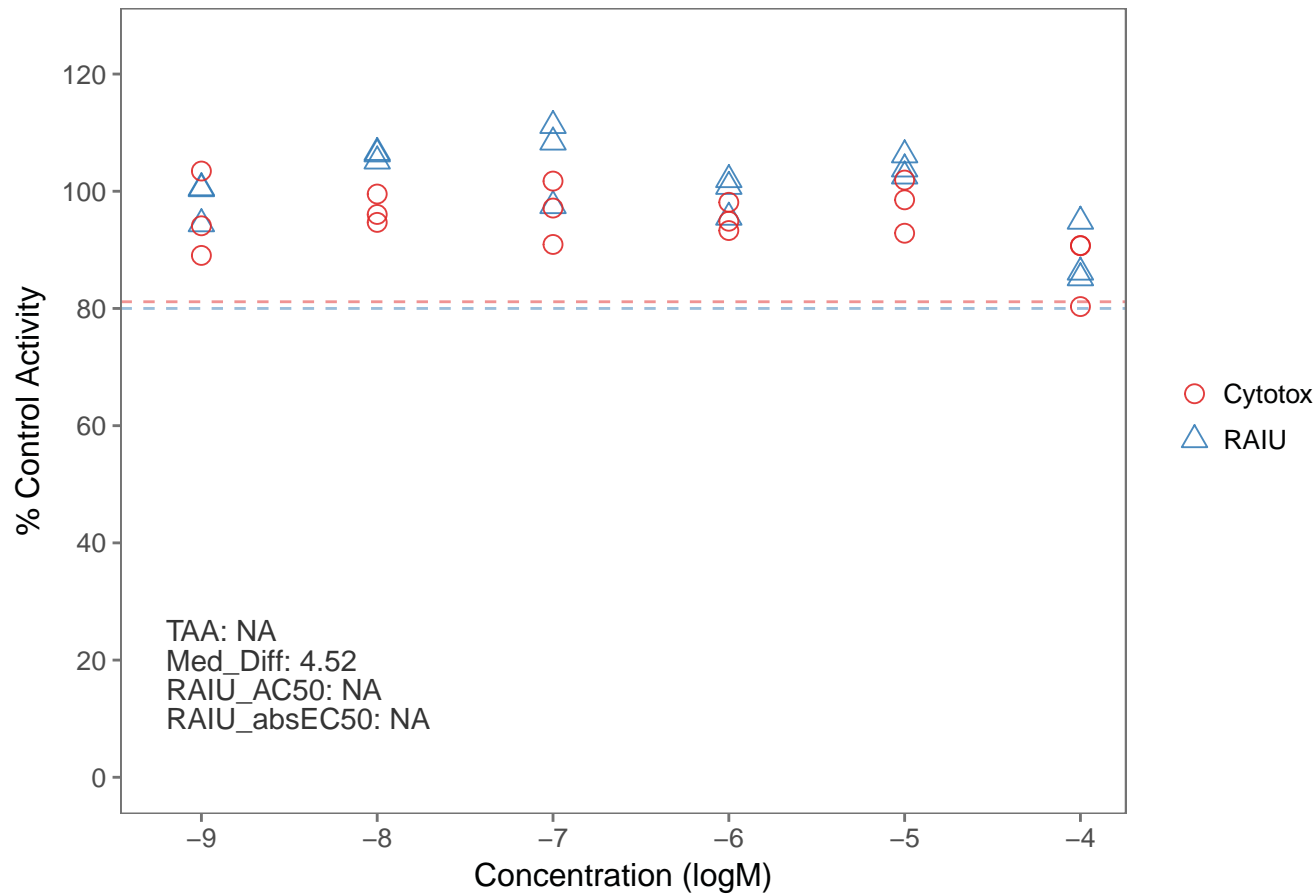

176. SPID: TP0001959F09  
NAME: Sodium 4-octylbenzenesulfonate  
CAS NO: 6149-03-7

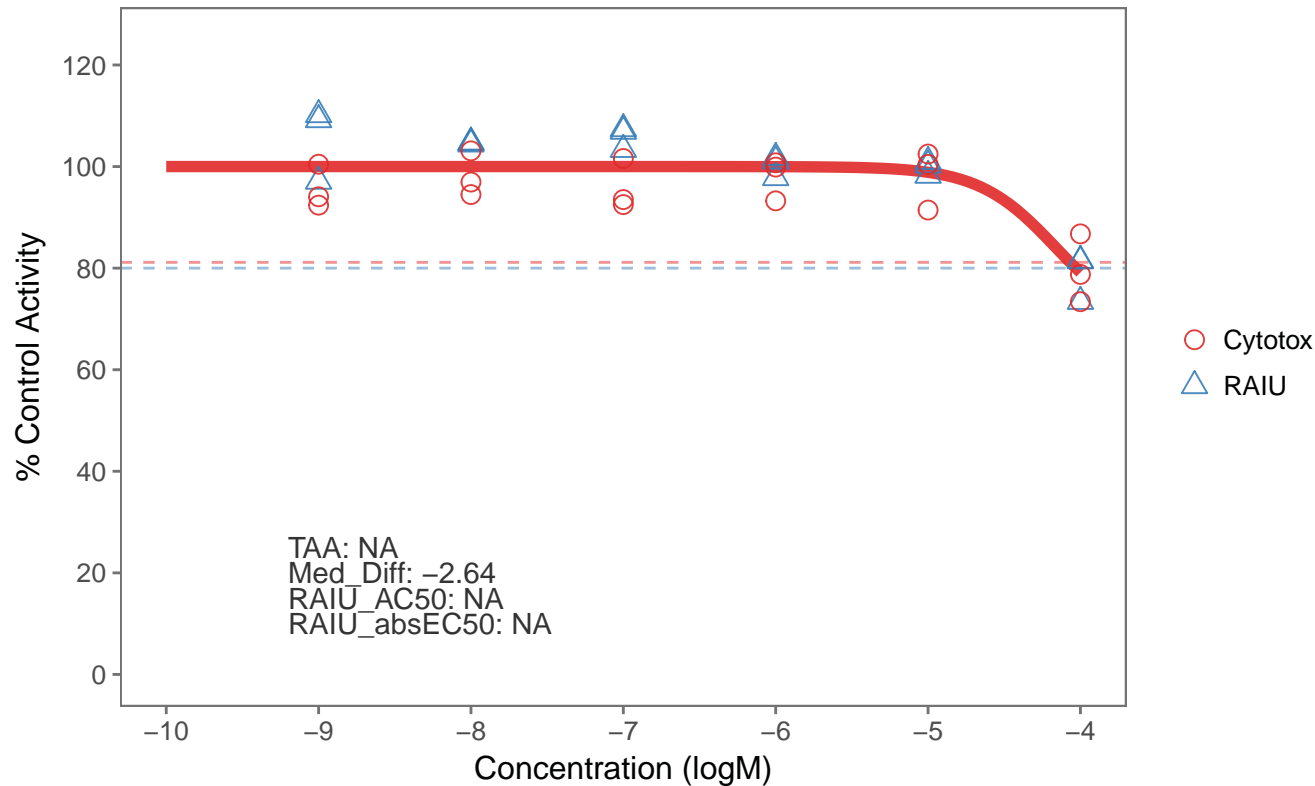



177. SPID: TP0001959F10

NAME: Pyridate

CAS NO: 55512-33-9

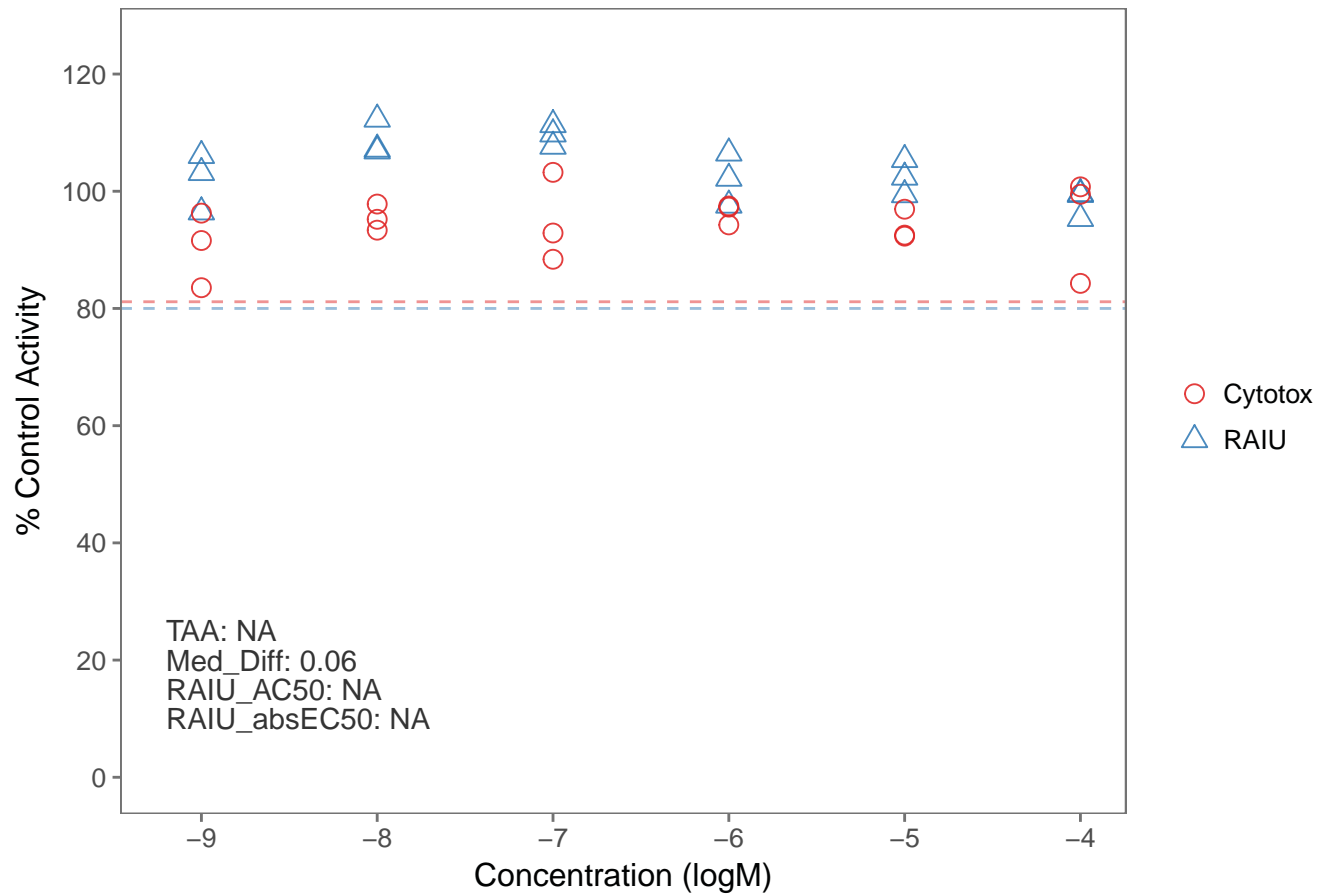

178. SPID: TP0001959G03  
NAME: Diphenylmethane  
CAS NO: 101-81-5

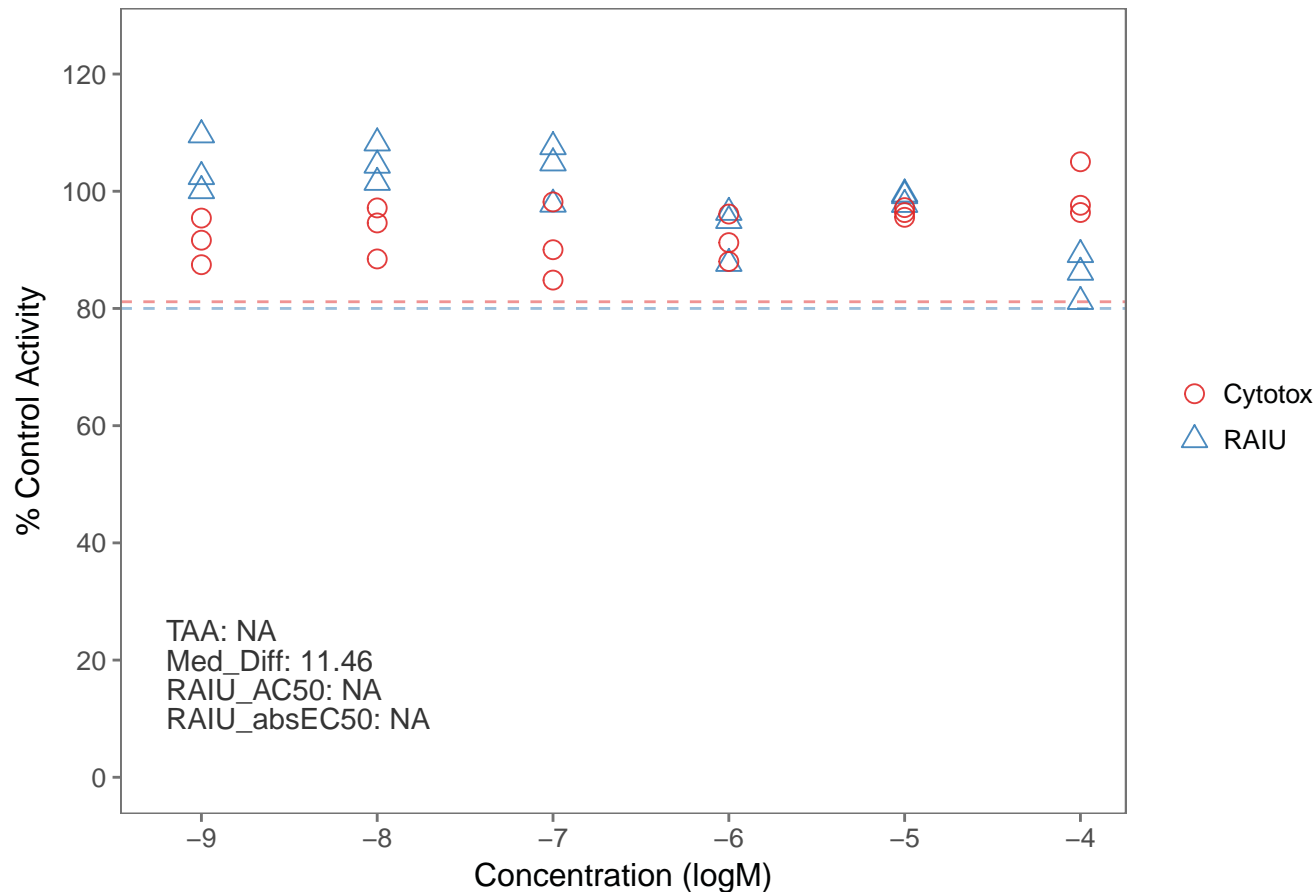

179. SPID: TP0001960B07  
NAME: Bromocriptine mesylate  
CAS NO: 22260-51-1

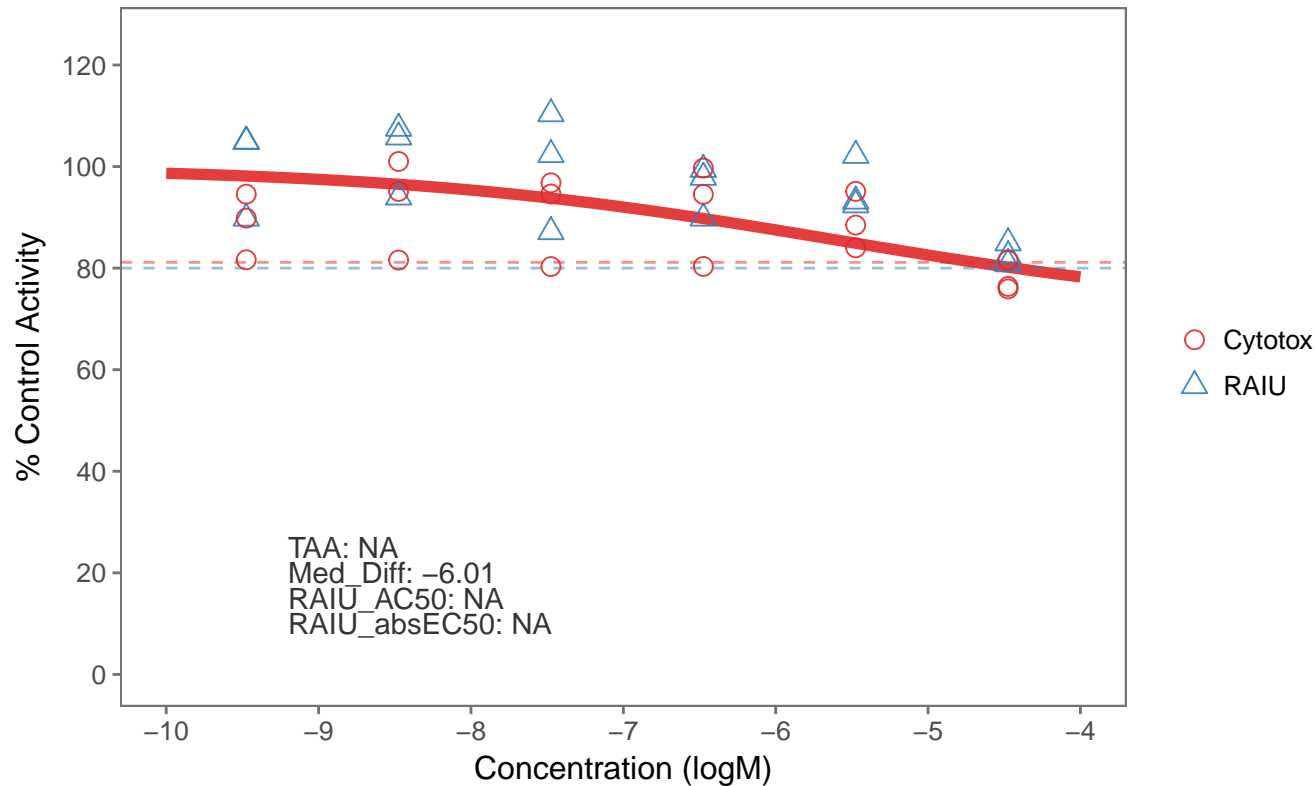

180. SPID: TP0001960B11  
NAME: (2-Nitro-1-propenyl)benzene  
CAS NO: 705-60-2

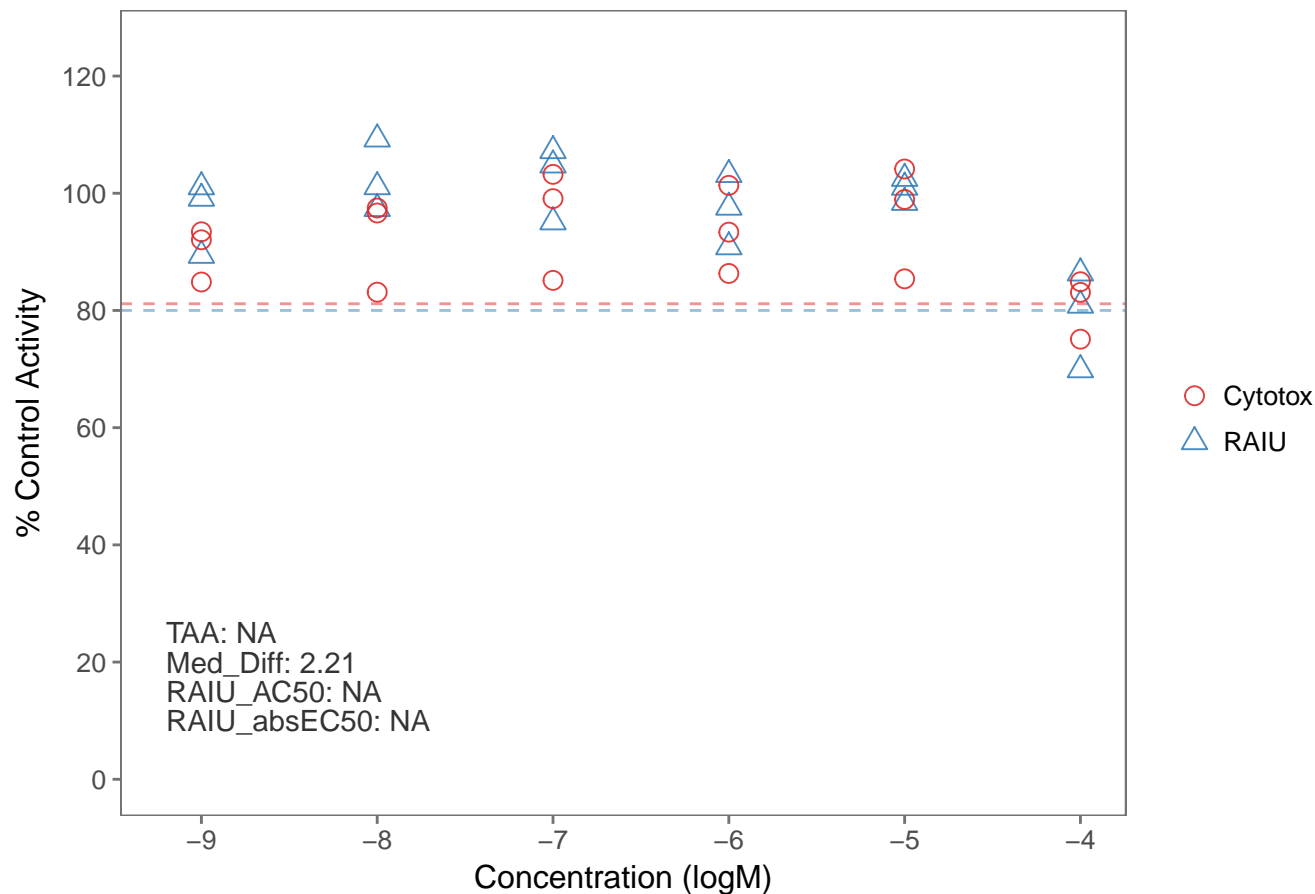

181. SPID: TP0001960D05  
NAME: Sodium 2-nitrophenolate  
CAS NO: 824-39-5

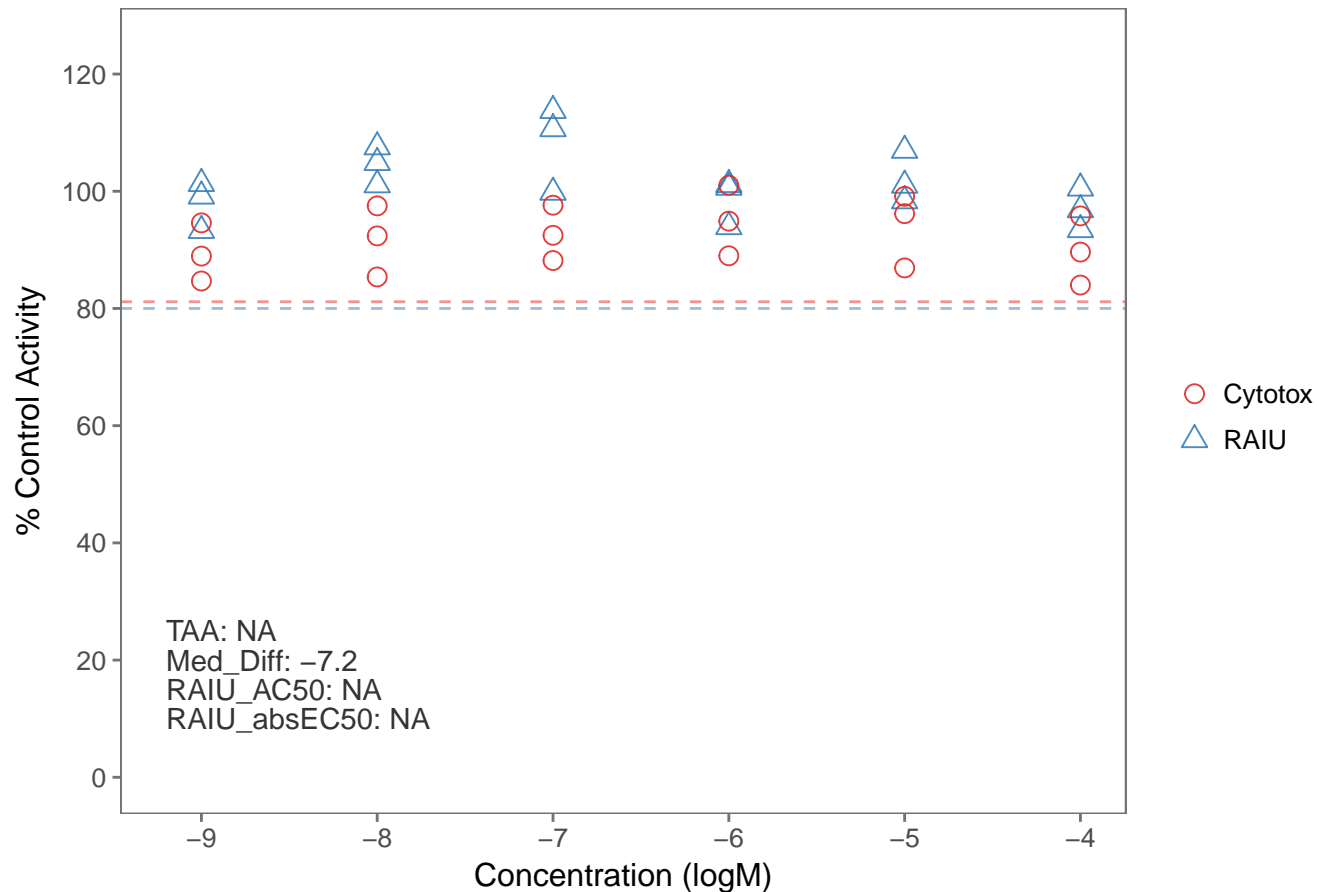

182. SPID: TP0001961F01  
NAME: (2E)-3-Phenylprop-2-enal  
CAS NO: 14371-10-9

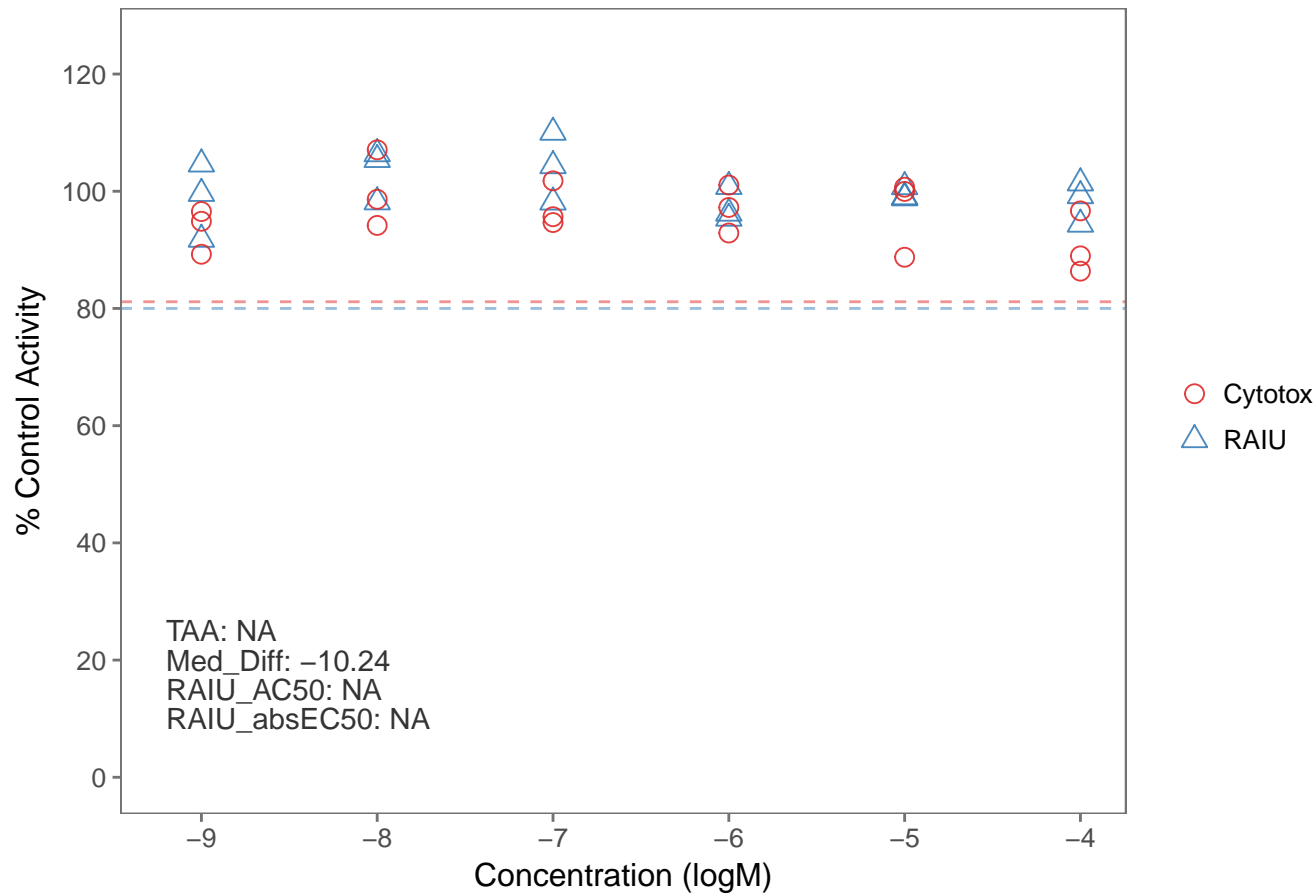

183. SPID: TP0001961F05

NAME: Indole

CAS NO: 120-72-9

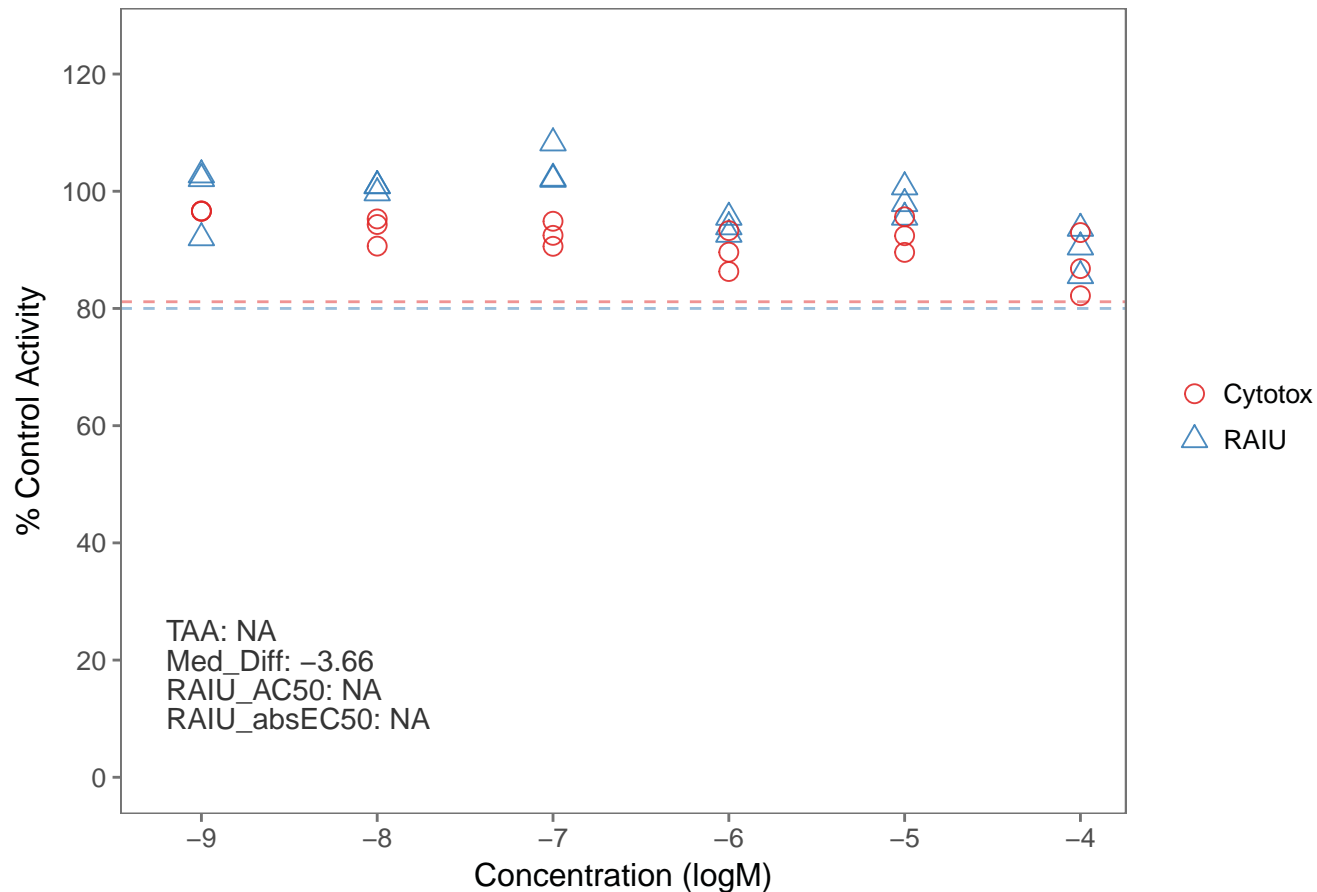

184. SPID: TP0001952E04

NAME: Potassium nitrate

CAS NO: 7757-79-1

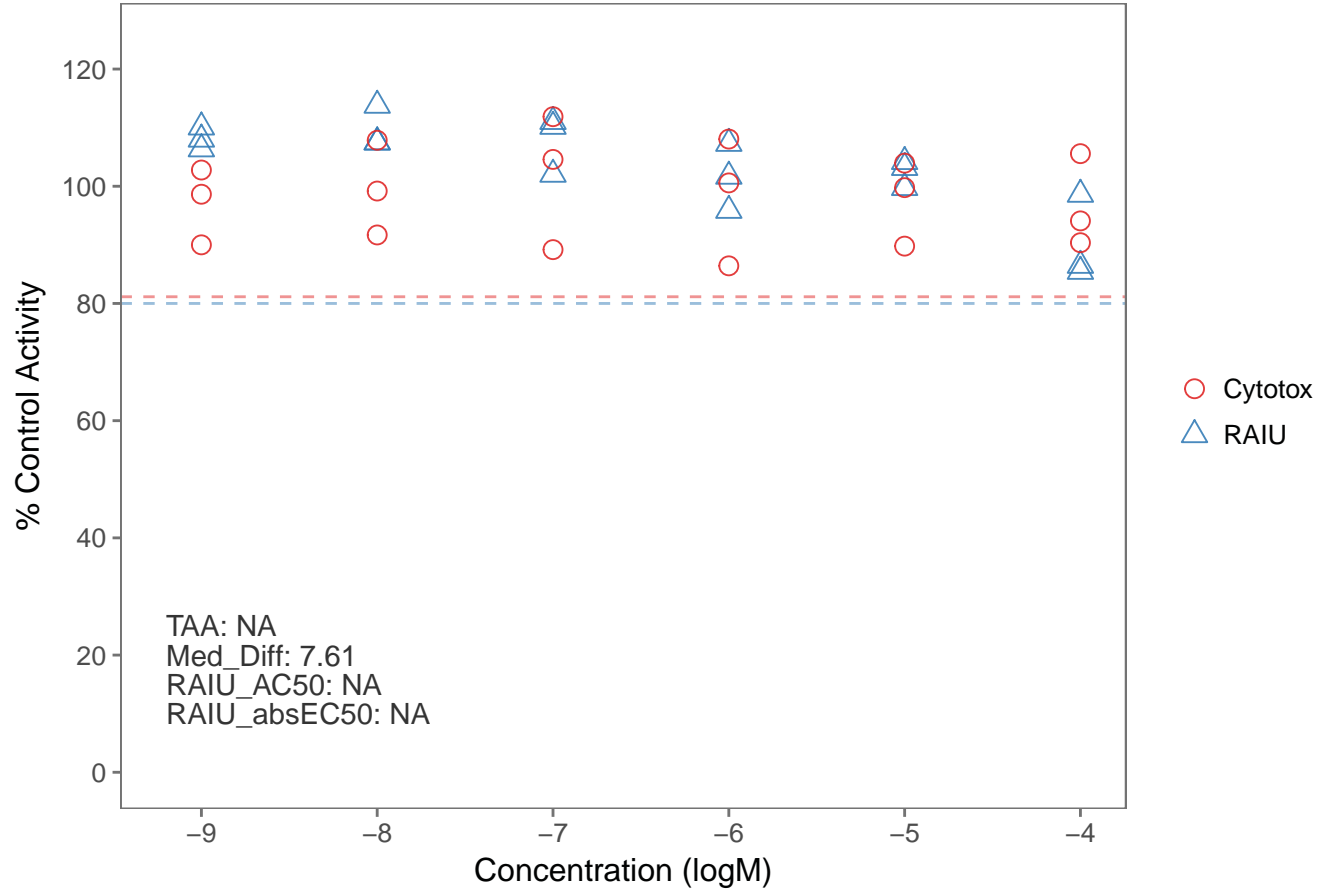



185. SPID: TP0001953A01  
NAME: 1,3-Dimethylolurea  
CAS NO: 140-95-4

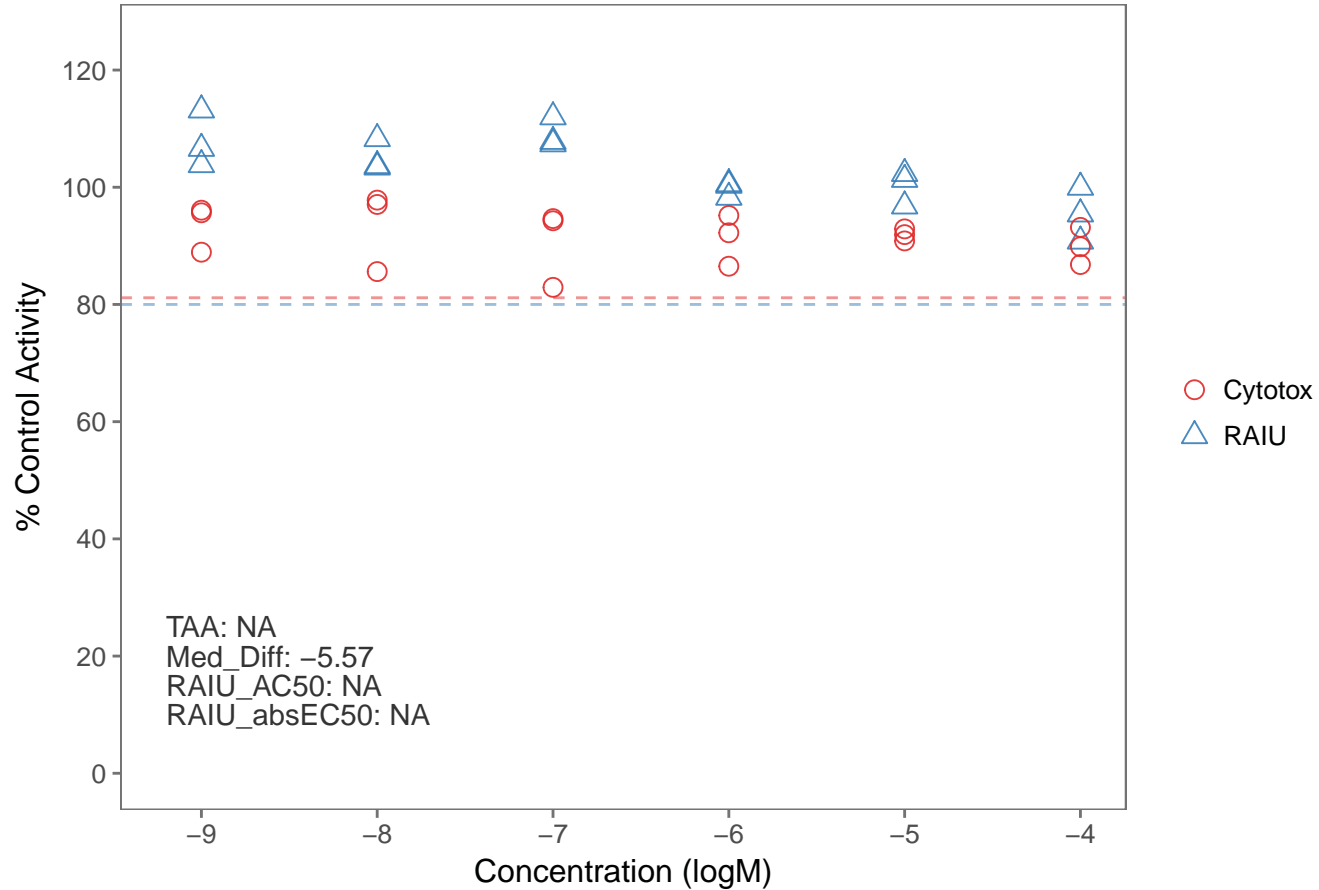

186. SPID: TP0001962B09  
NAME: 2,4-Dihydroxybenzophenone  
CAS NO: 131-56-6

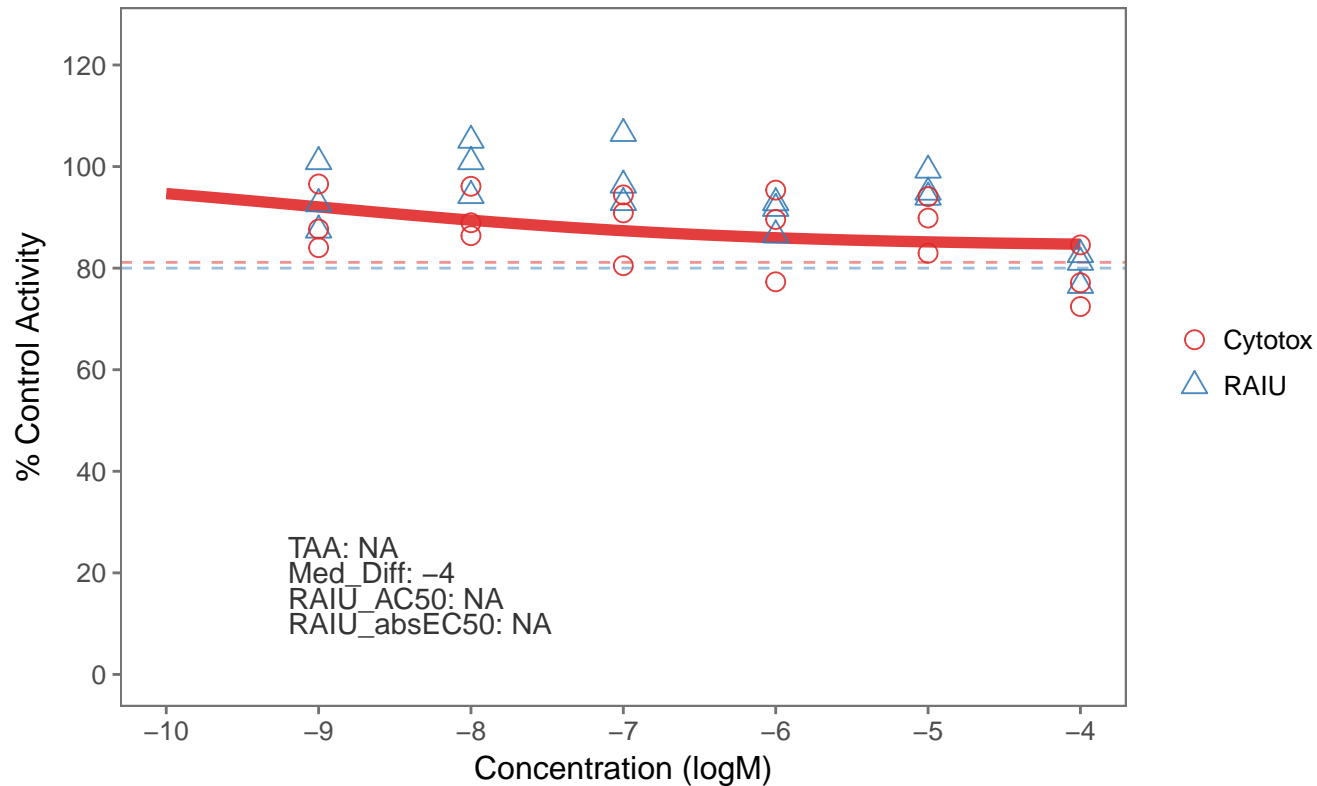

187. SPID: TP0001962D01  
NAME: Triethylene glycol dibenzoate  
CAS NO: 120-56-9

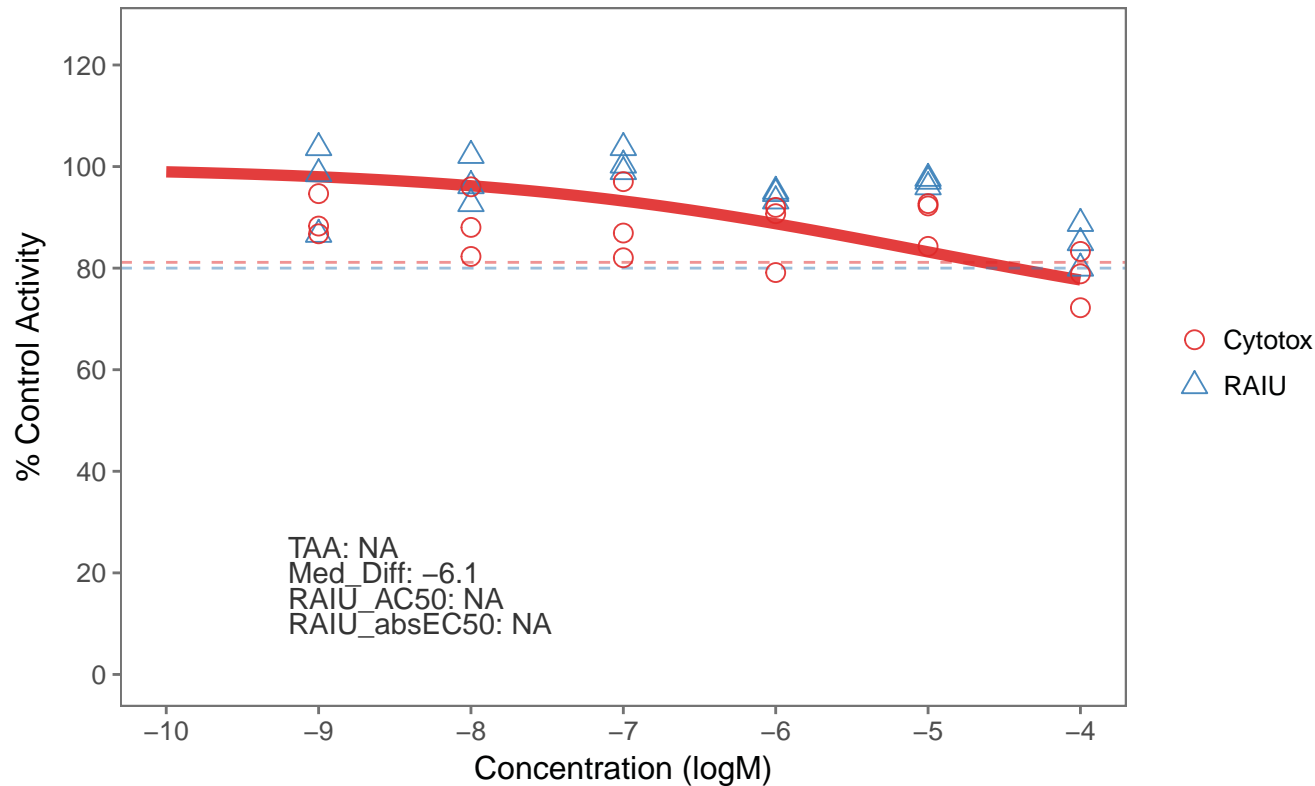

188. SPID: TP0001962F01

NAME: 4-Butylphenol

CAS NO: 1638-22-8

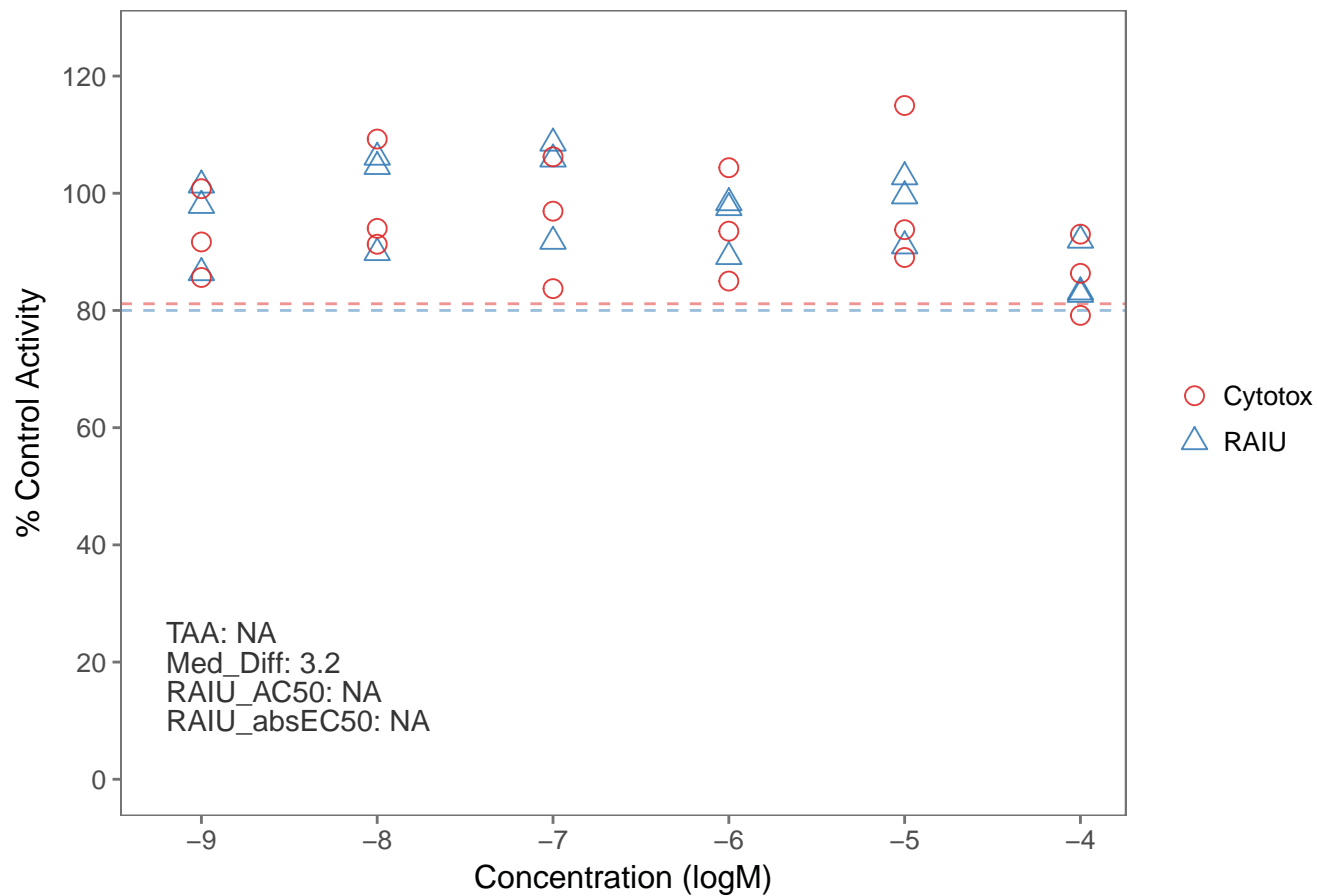

189. SPID: TP0001962F05

NAME: Linoleic acid

CAS NO: 60-33-3

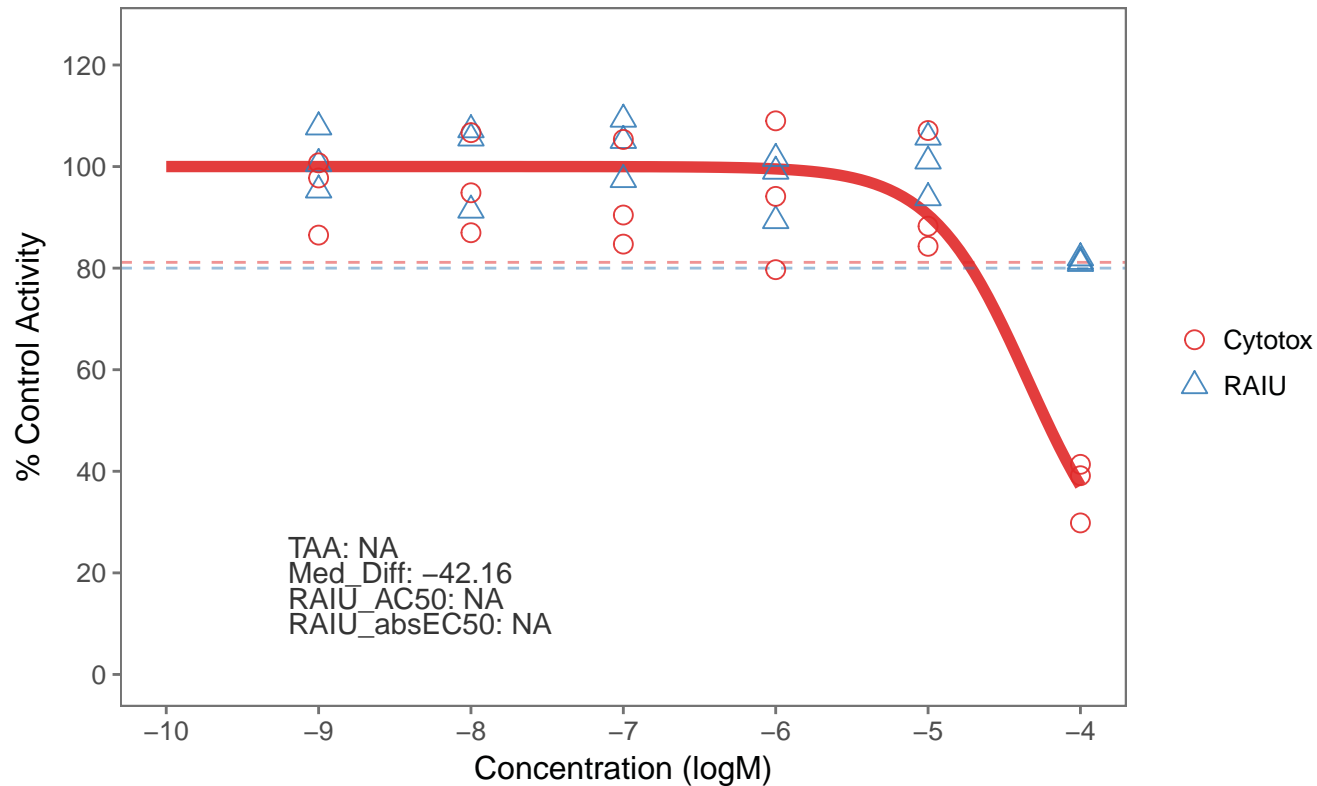

190. SPID: TP0001962G02

NAME: Ergocalciferol

CAS NO: 50-14-6

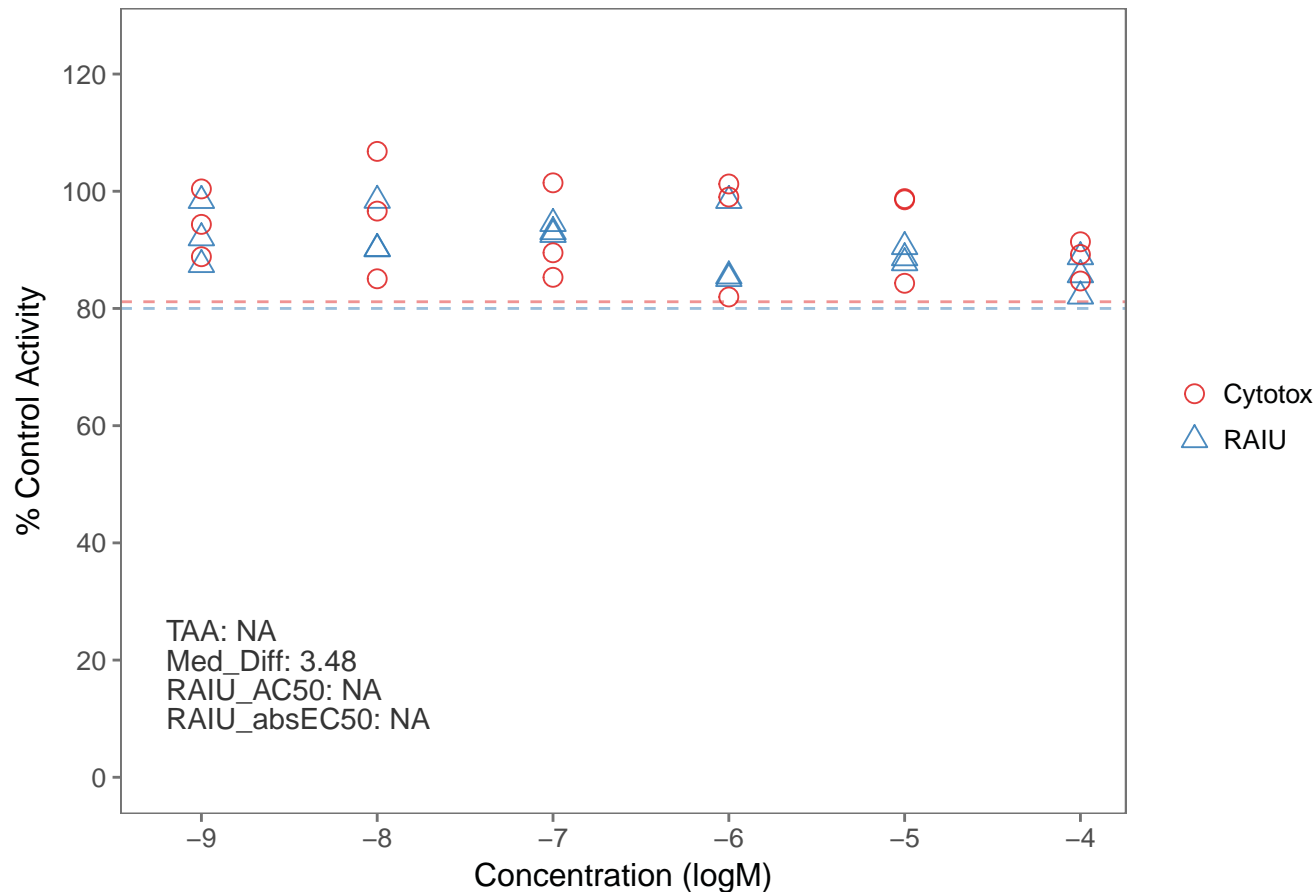

191. SPID: TP0001963B05  
NAME: Dimethyl hydrogen phosphite  
CAS NO: 868-85-9

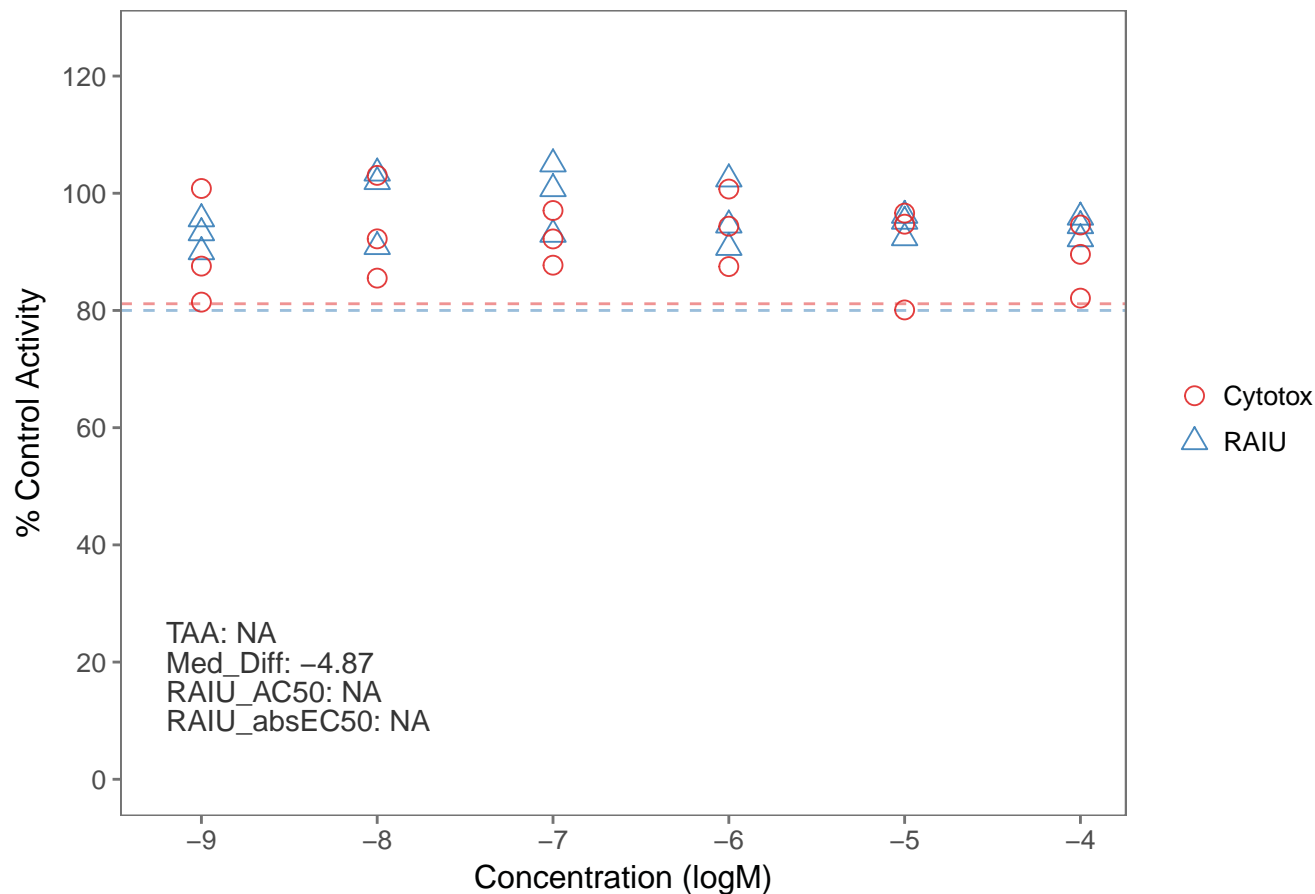

192. SPID: TP0001963F01

NAME: Diphenyl oxide

CAS NO: 101-84-8

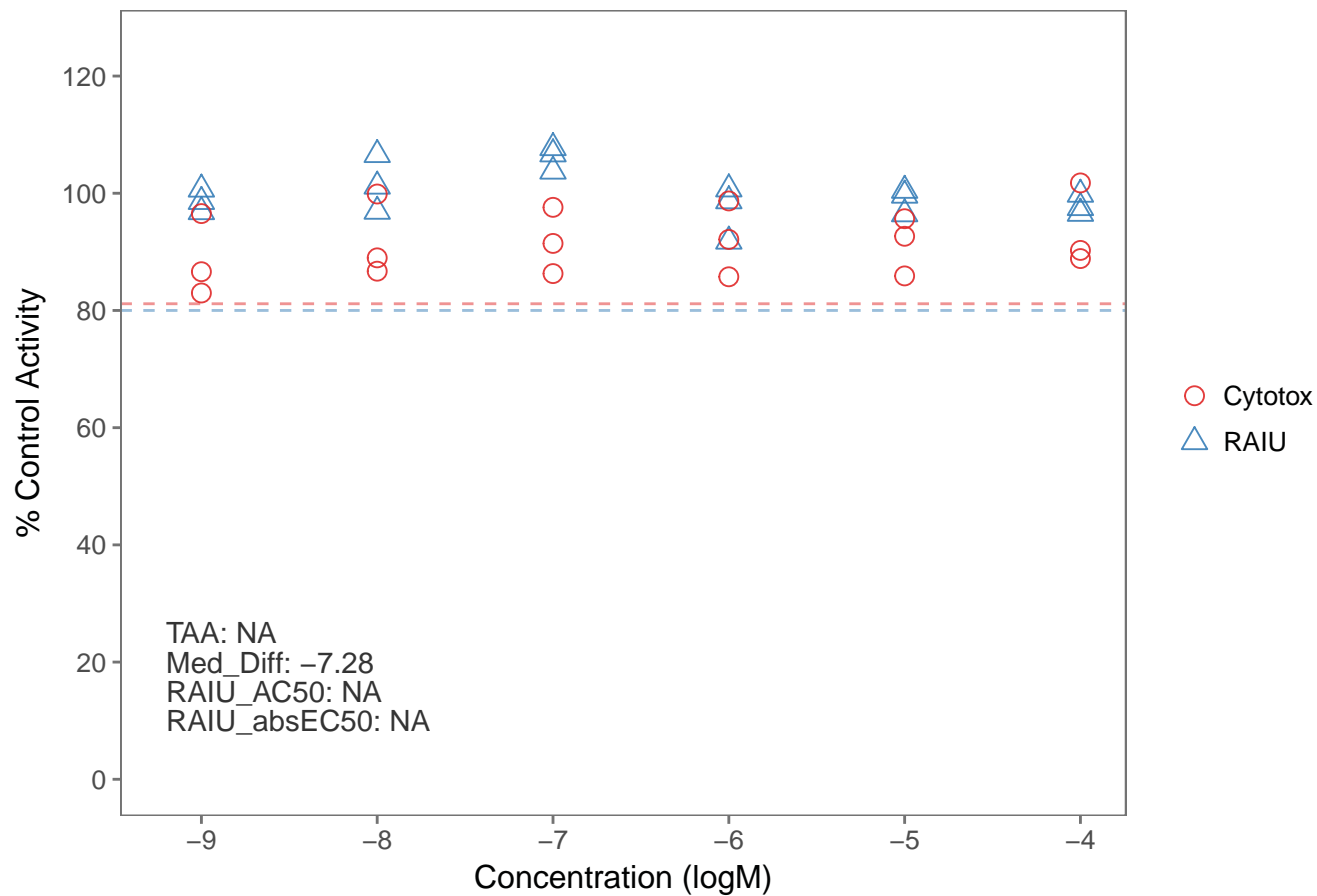



193. SPID: TP0001953C03  
NAME: Octadecyl sulfate sodium salt  
CAS NO: 1120-04-3

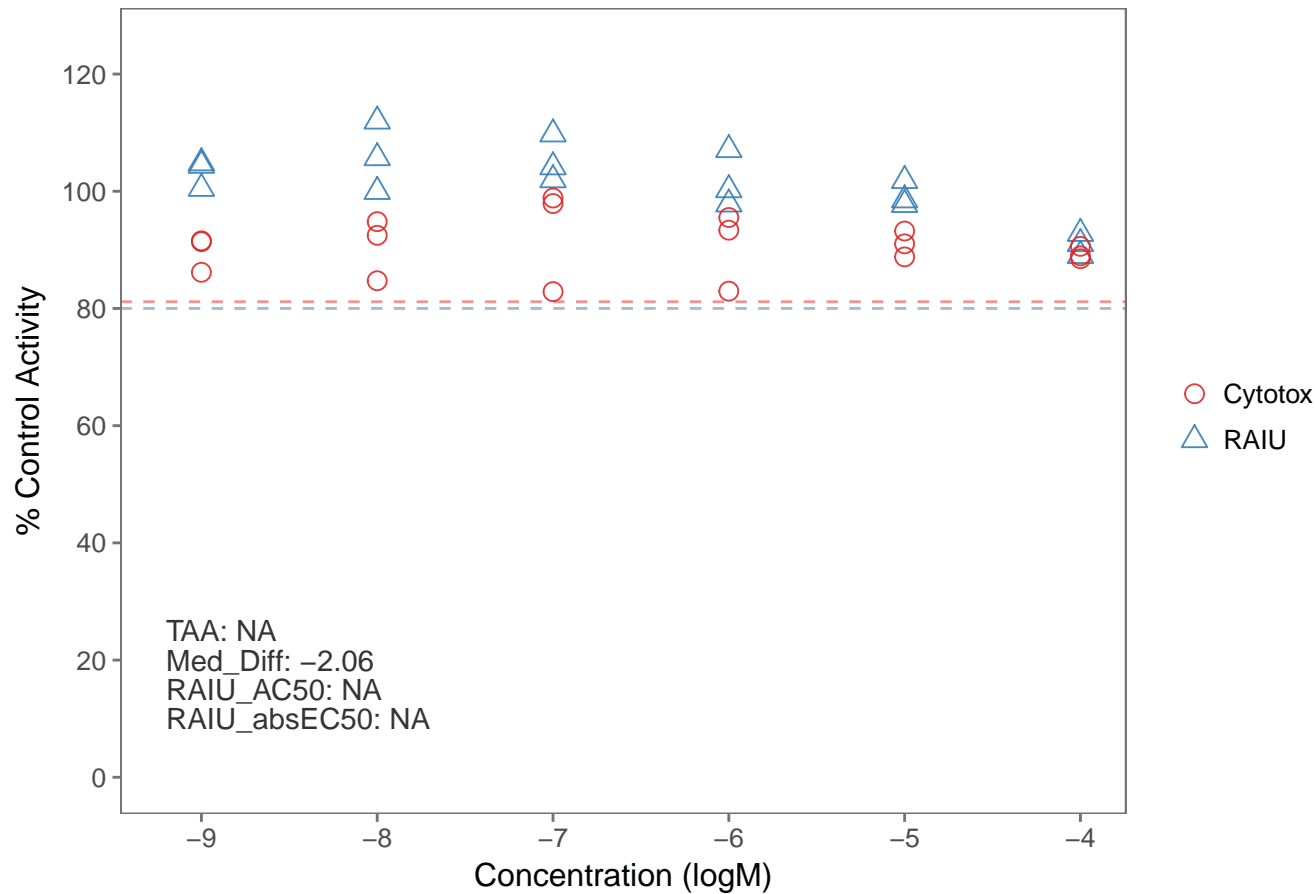

194. SPID: TP0001953C05  
NAME: 3,4-Dichloro-1-butene  
CAS NO: 760-23-6

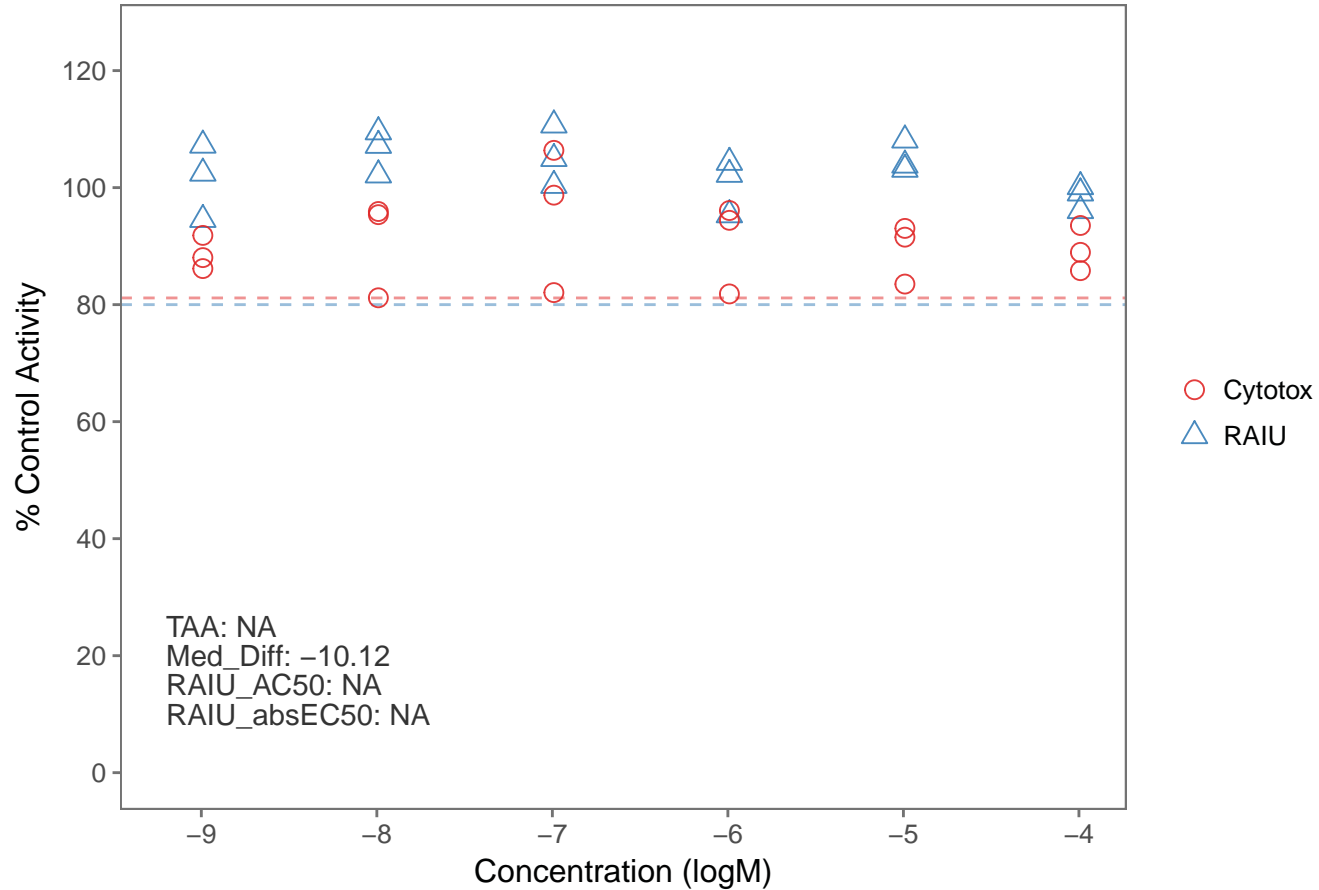

195. SPID: TP0001953C08  
NAME: Potassium 2-ethylhexanoate  
CAS NO: 3164-85-0

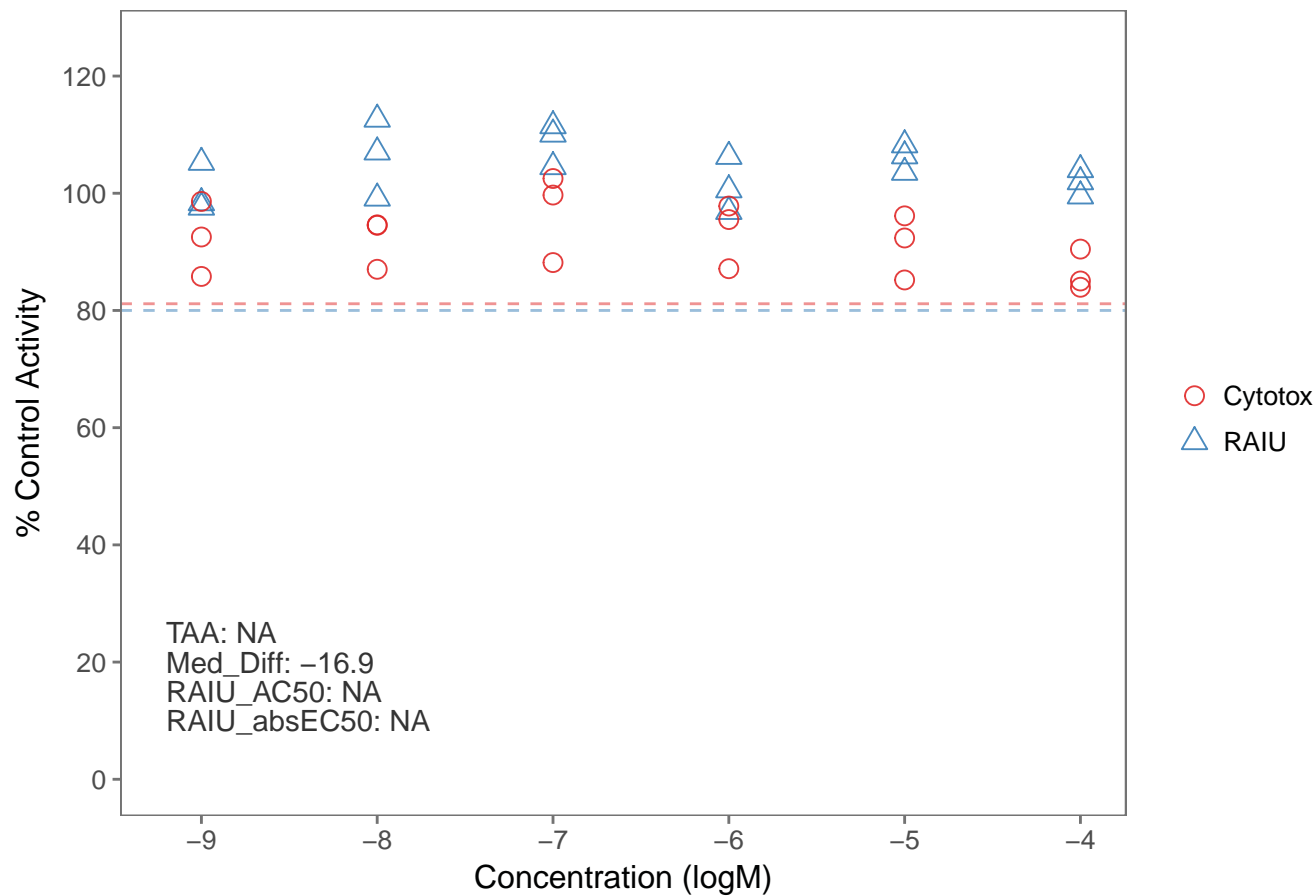

196. SPID: TP0001953D11  
NAME: N,N-Dimethylacetamide  
CAS NO: 127-19-5

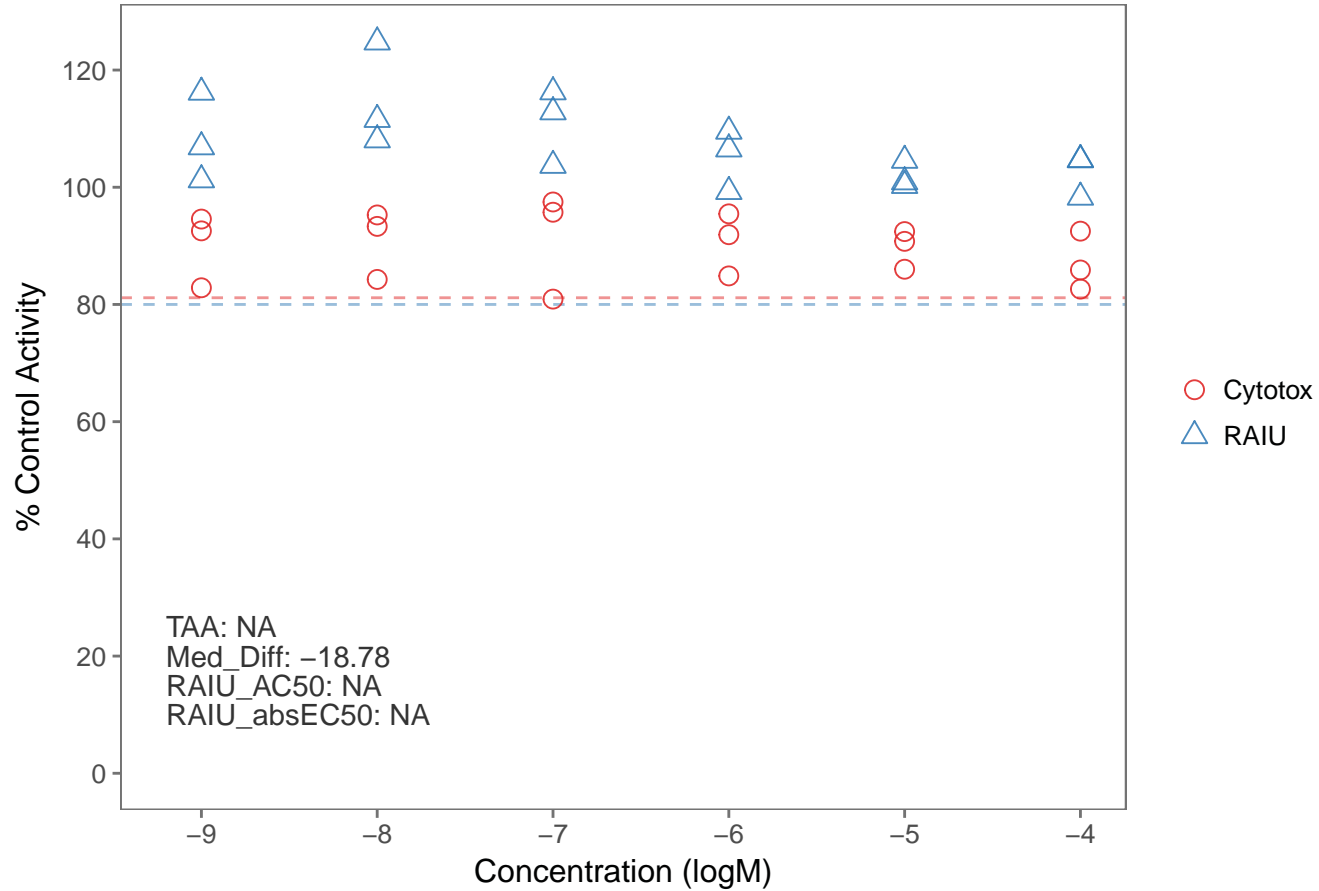

197. SPID: TP0001953E01

NAME: Thiocarbazide

CAS NO: 2231-57-4

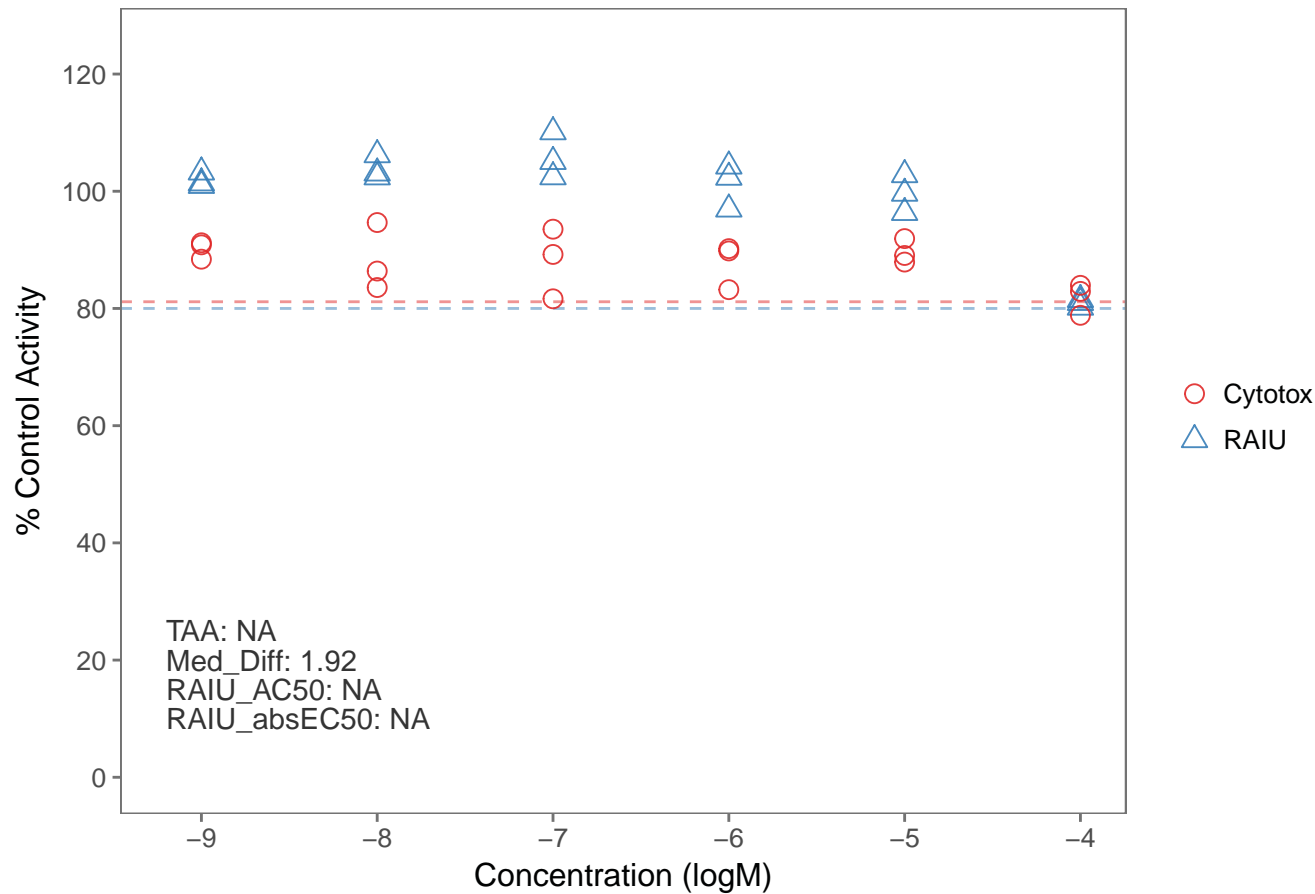

198. SPID: TP0001953F01  
NAME: 2-Ethylhexyl octadecanoate  
CAS NO: 22047-49-0

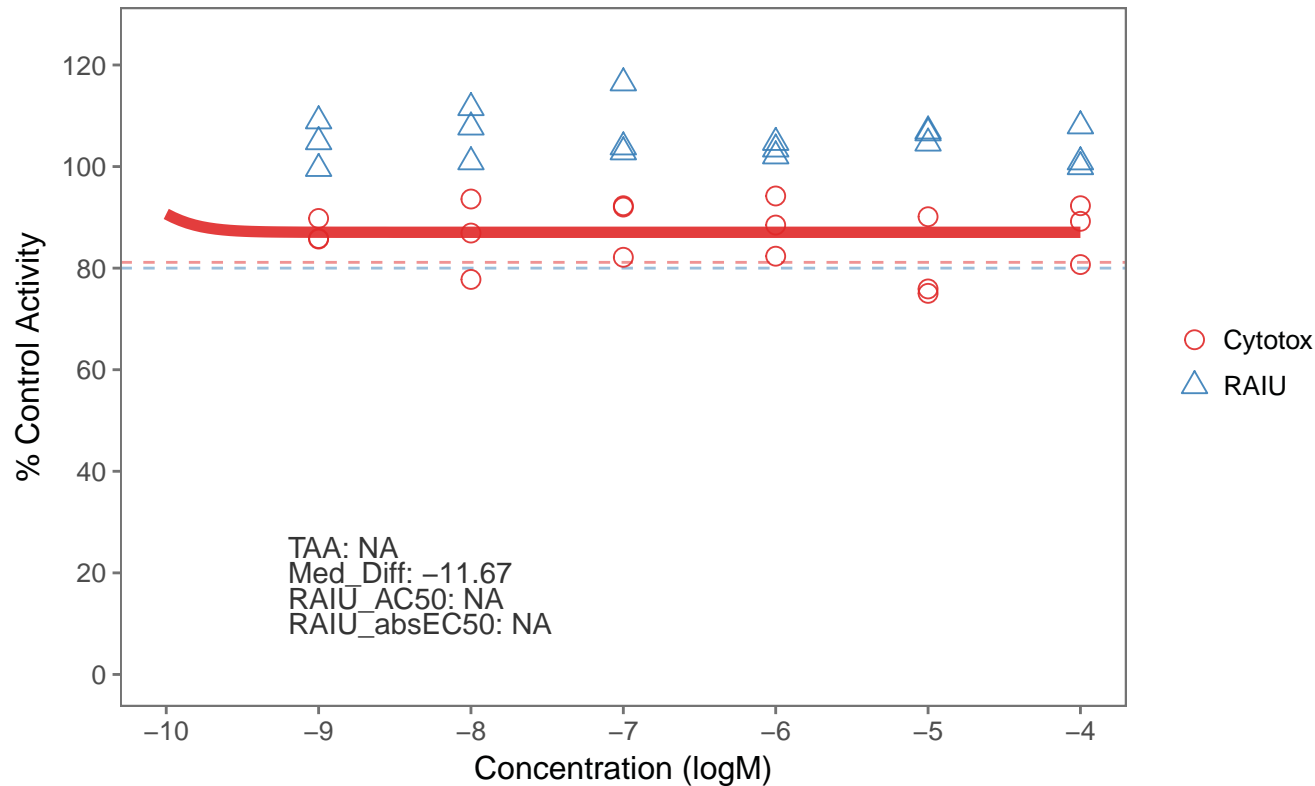

199. SPID: TP0001954C03

NAME: 4-Thiocresol

CAS NO: 106-45-6

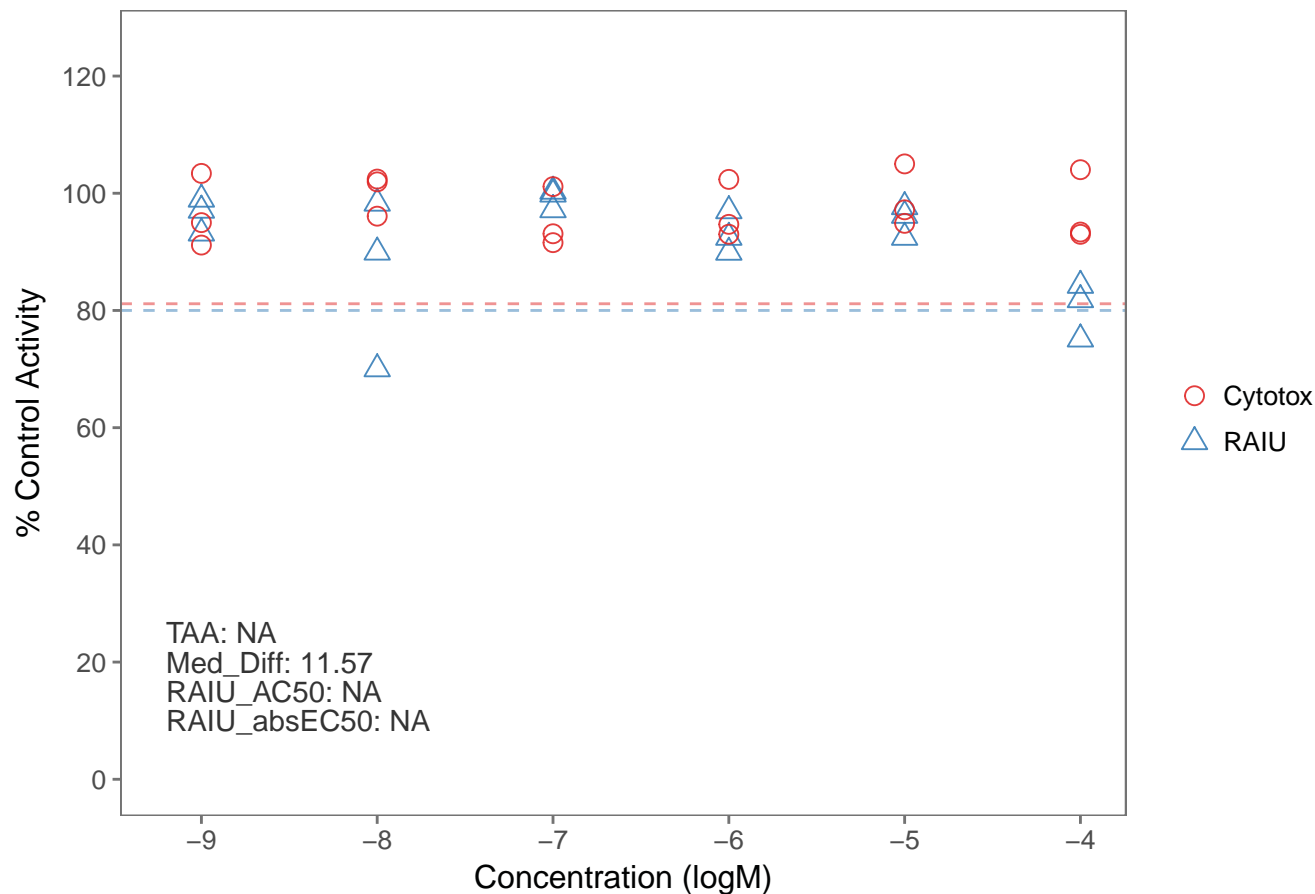

200. SPID: TP0001954C08  
NAME: Dimethyl methylphosphonate  
CAS NO: 756-79-6

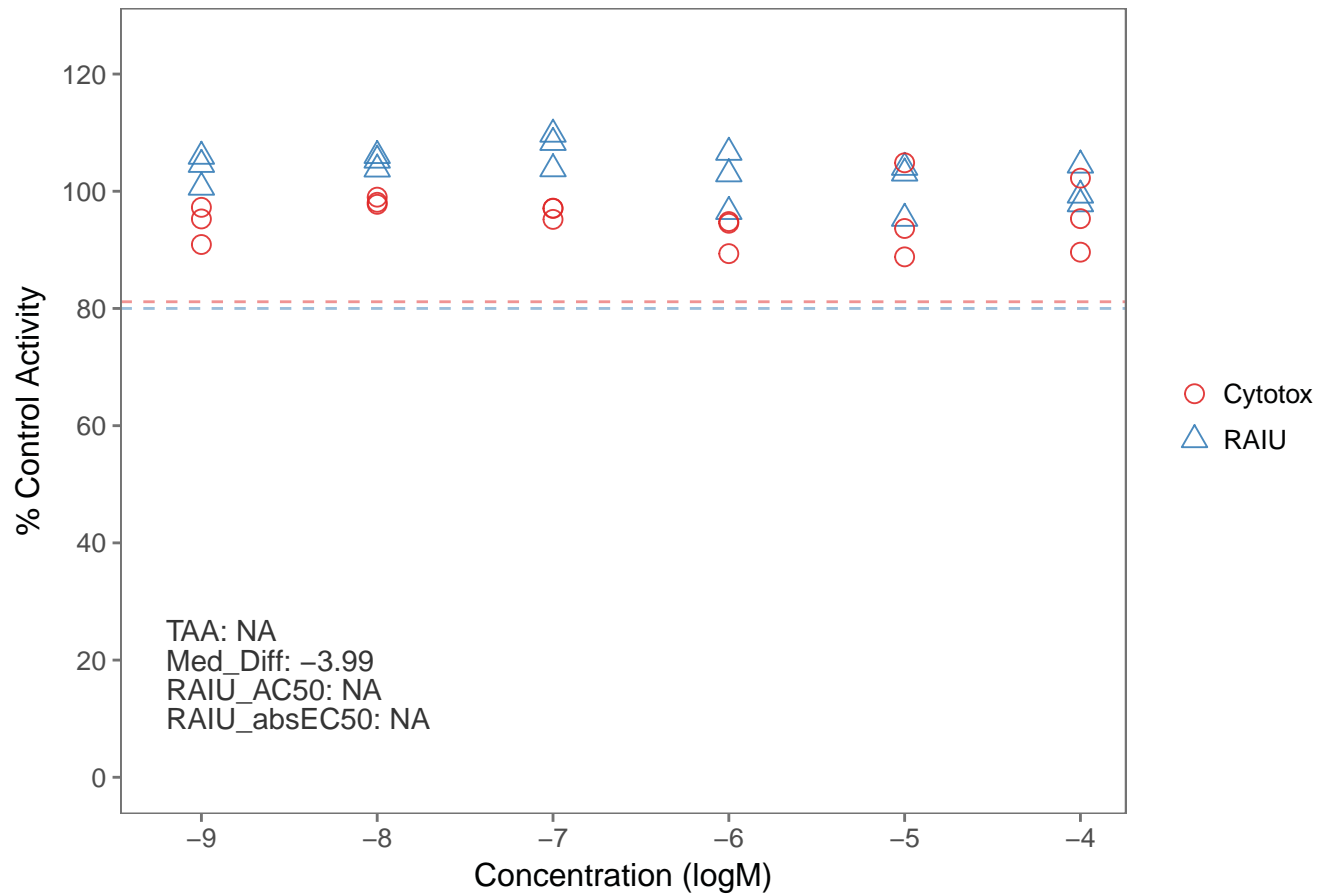



201. SPID: TP0001954E07

NAME: Heptanophenone

CAS NO: 1671-75-6

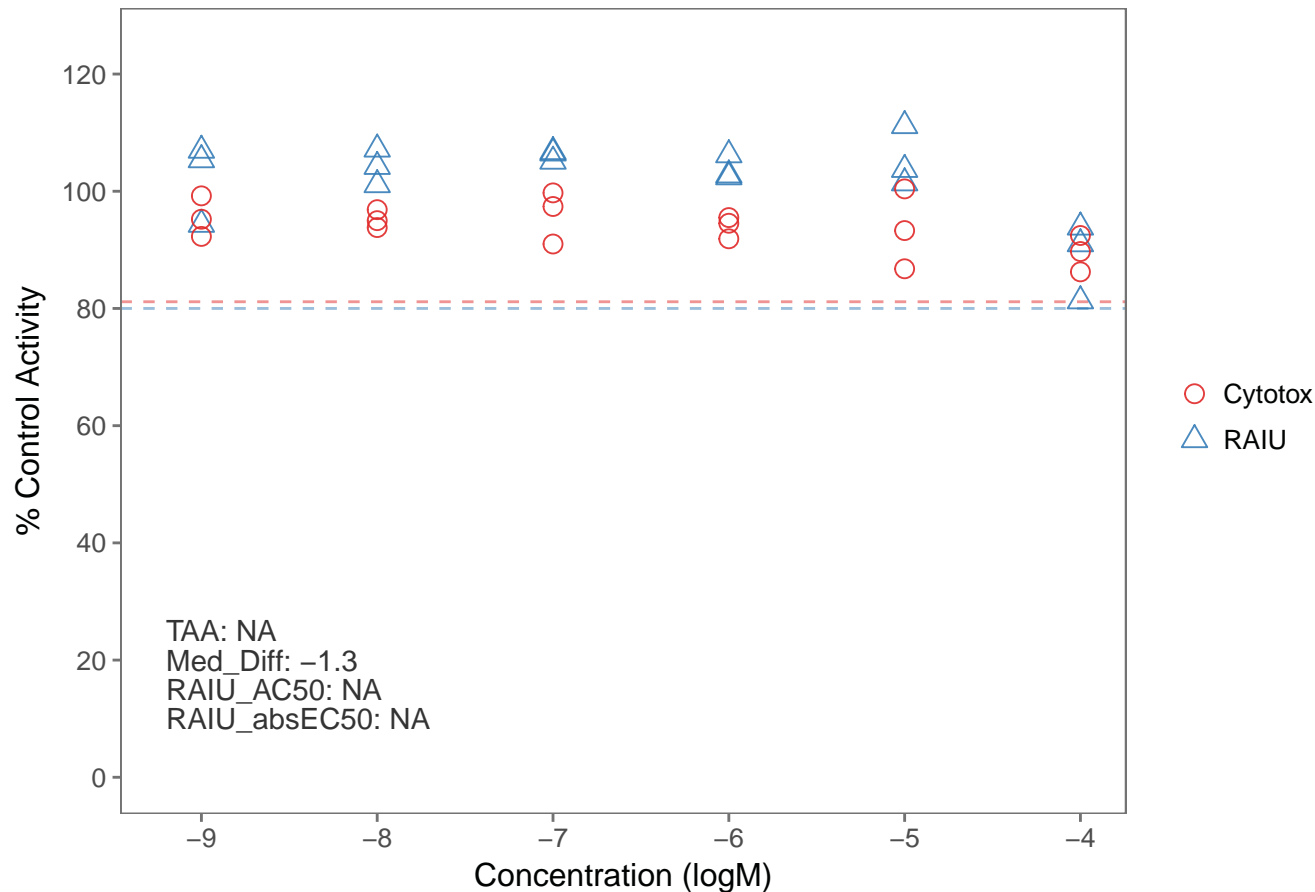

202. SPID: TP0001954E08  
NAME: Dicyclohexyl phthalate  
CAS NO: 84-61-7

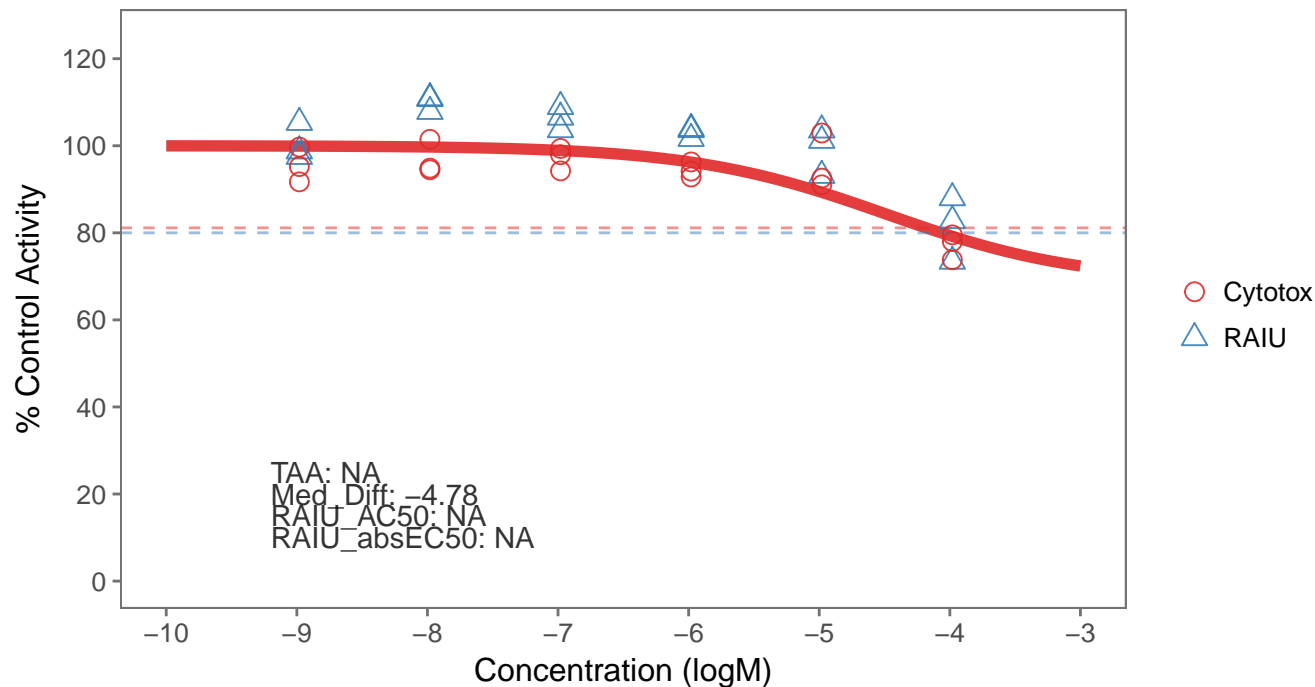

203. SPID: TP0001954F01  
NAME: Dimethoxydimethylsilane  
CAS NO: 1112-39-6

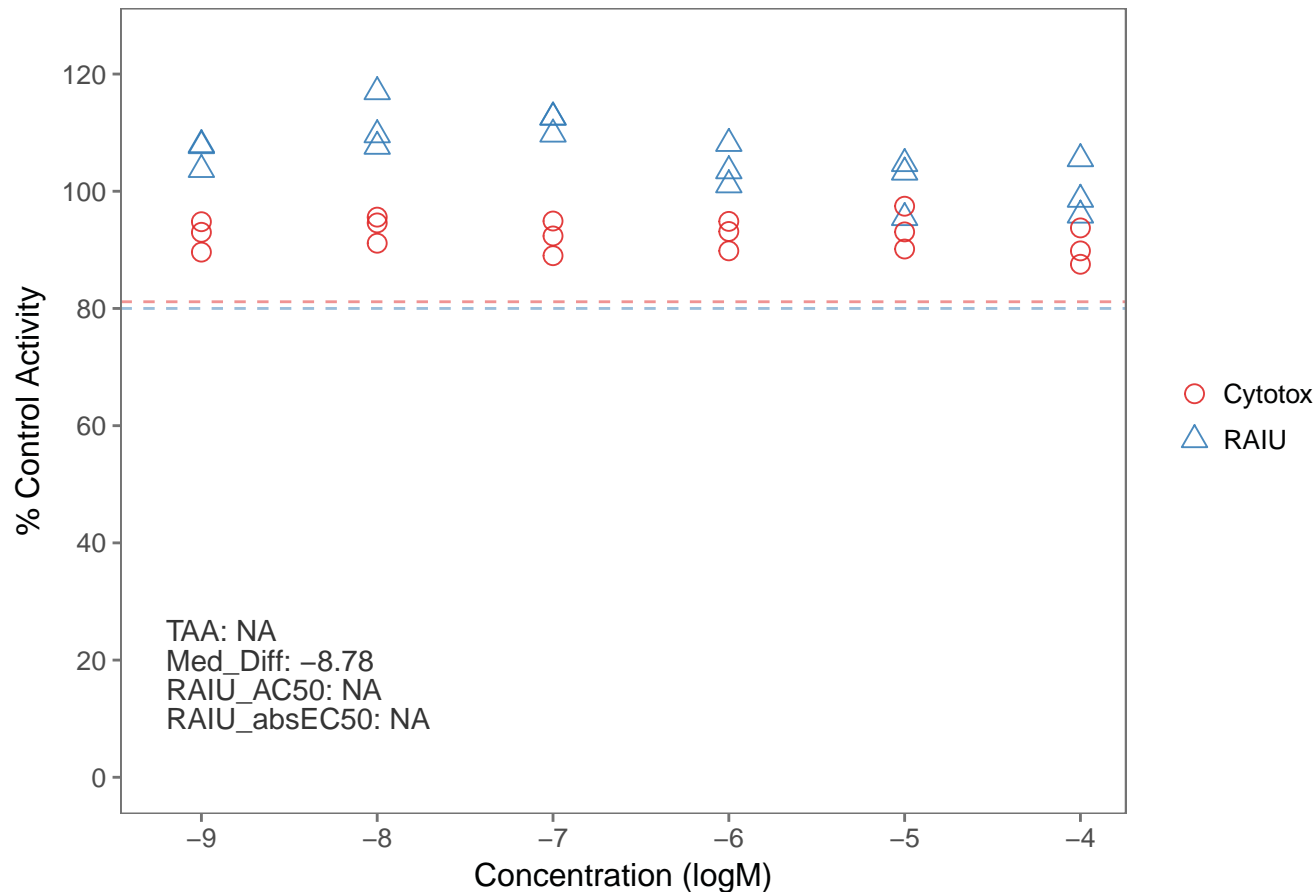

204. SPID: TP0001954F02  
NAME: 4-(Hexyloxy)phenol  
CAS NO: 18979-55-0

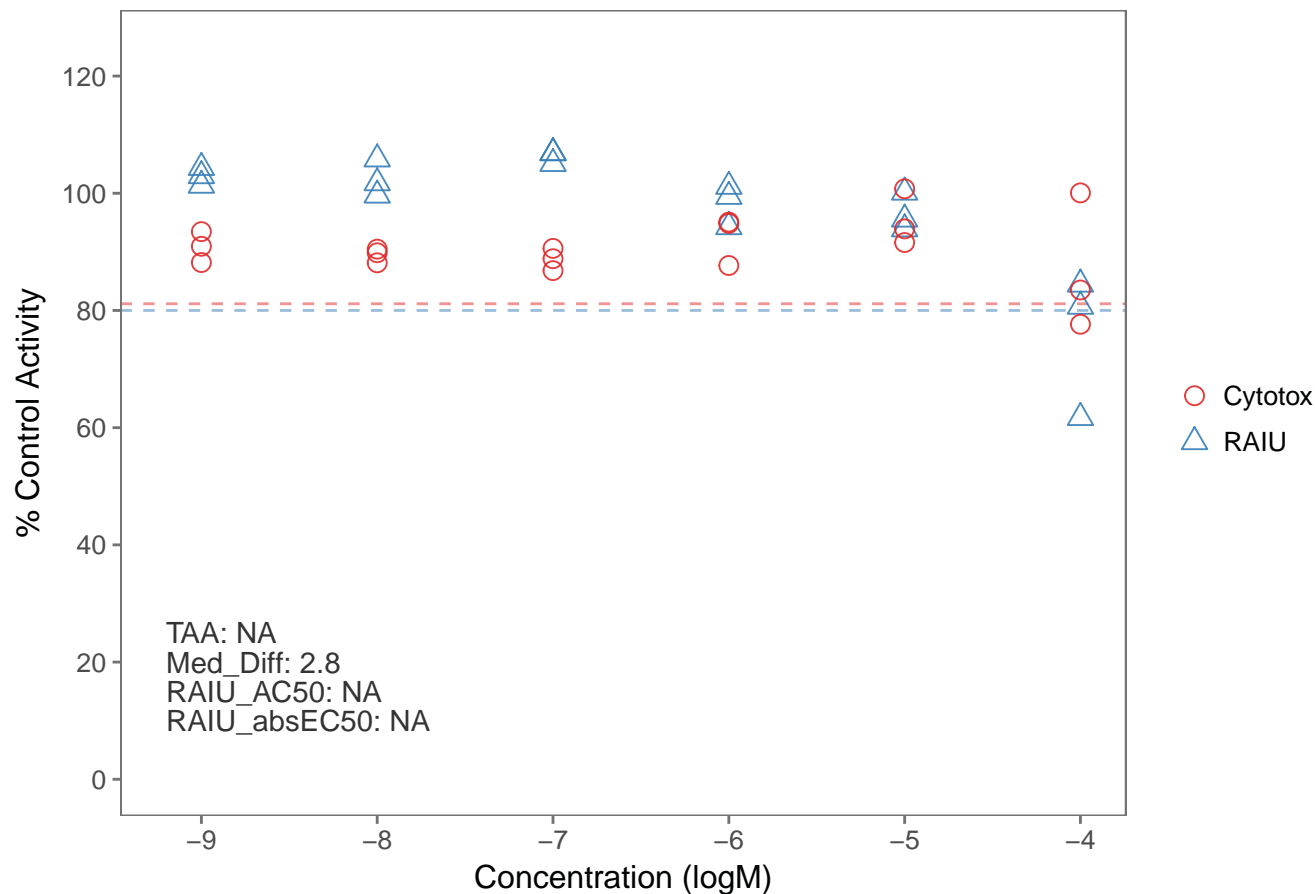

205. SPID: TP0001954F03

NAME: Mecoprop

CAS NO: 93-65-2

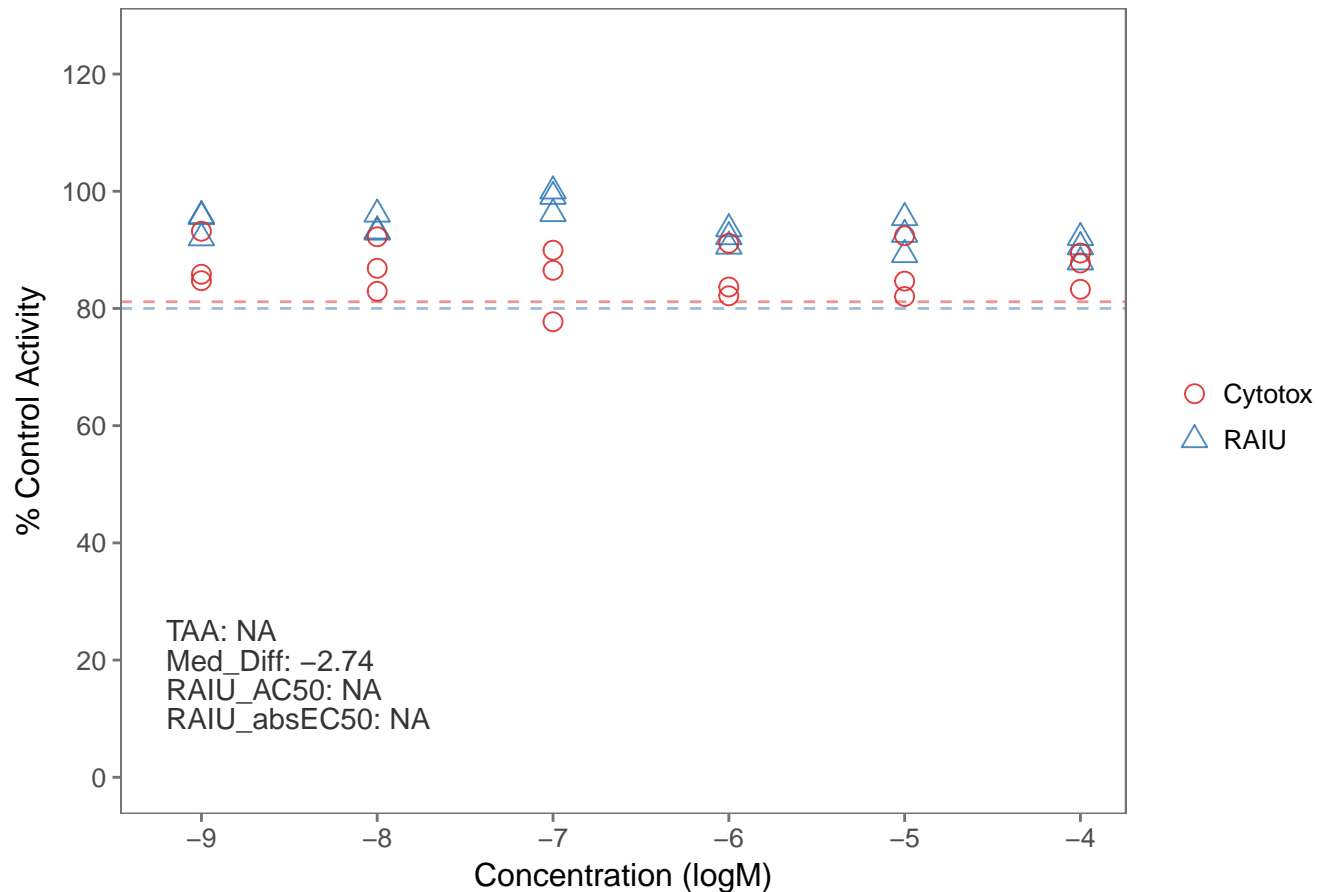

206. SPID: TP0001955C08  
NAME: 2,3-Dihydro-2,2-dimethyl-7-benzofuranol  
CAS NO: 1563-38-8

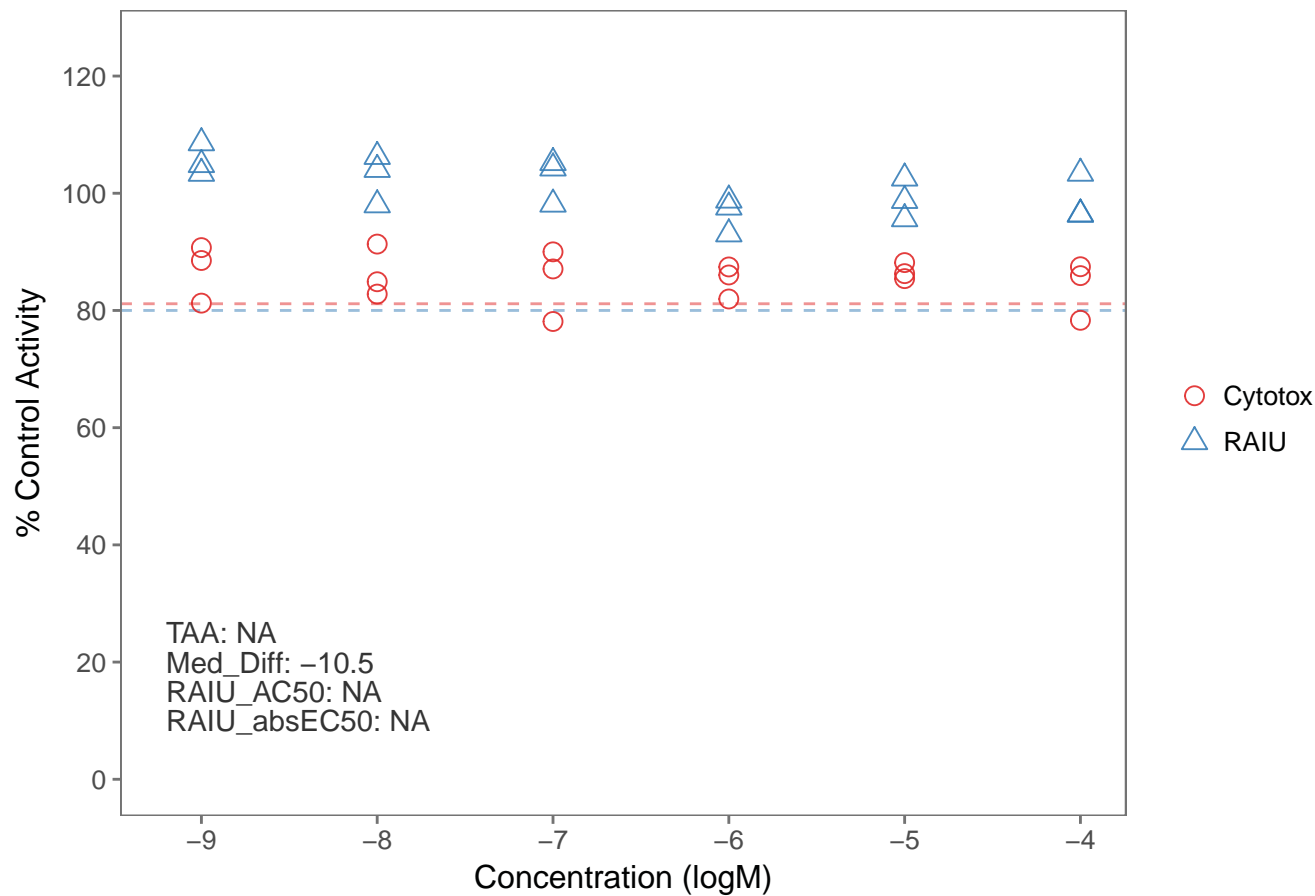

207. SPID: TP0001955F01  
NAME: Polydimethylsiloxane  
CAS NO: 9016-00-6

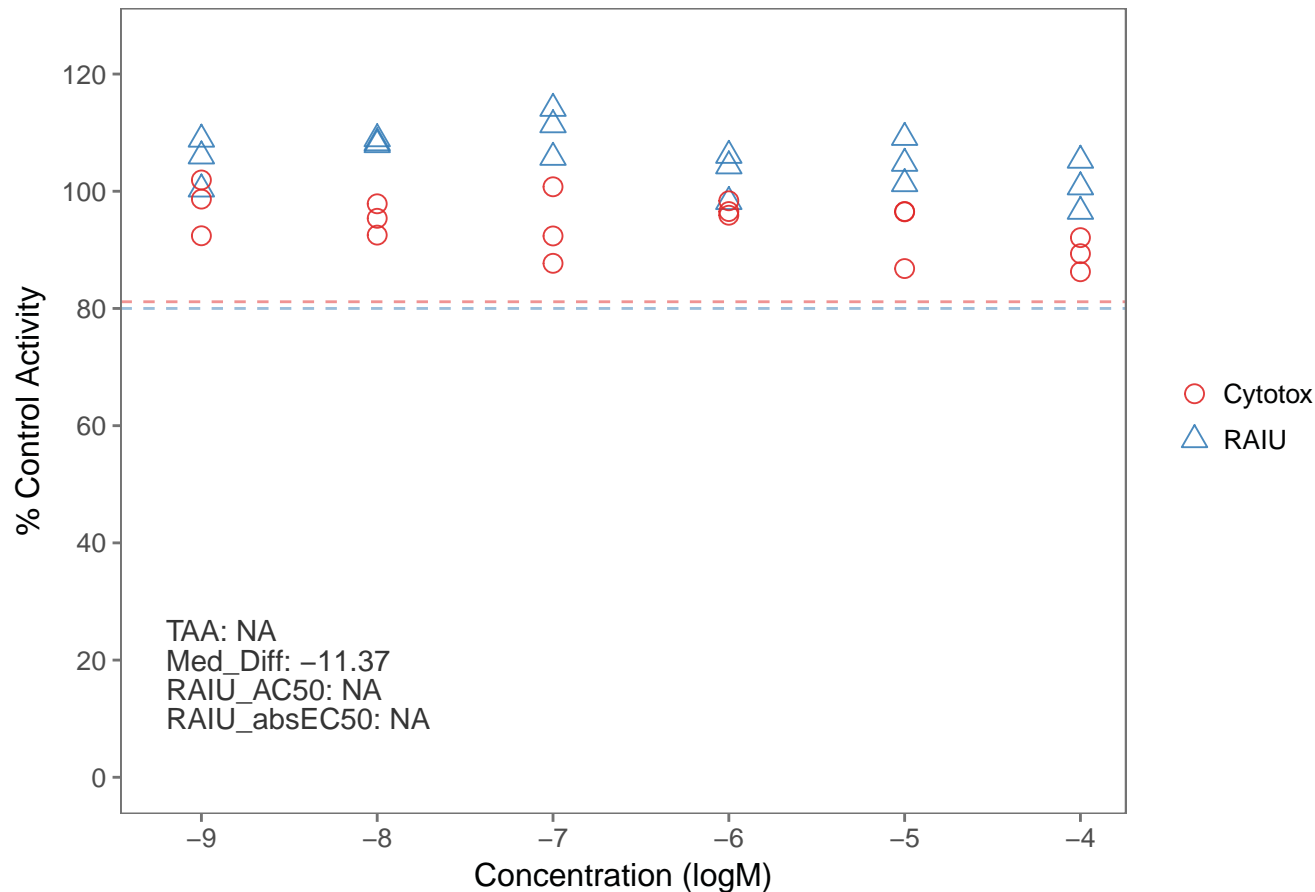

208. SPID: TP0001956C08  
NAME: 2-Butyne-1,4-diol  
CAS NO: 110-65-6

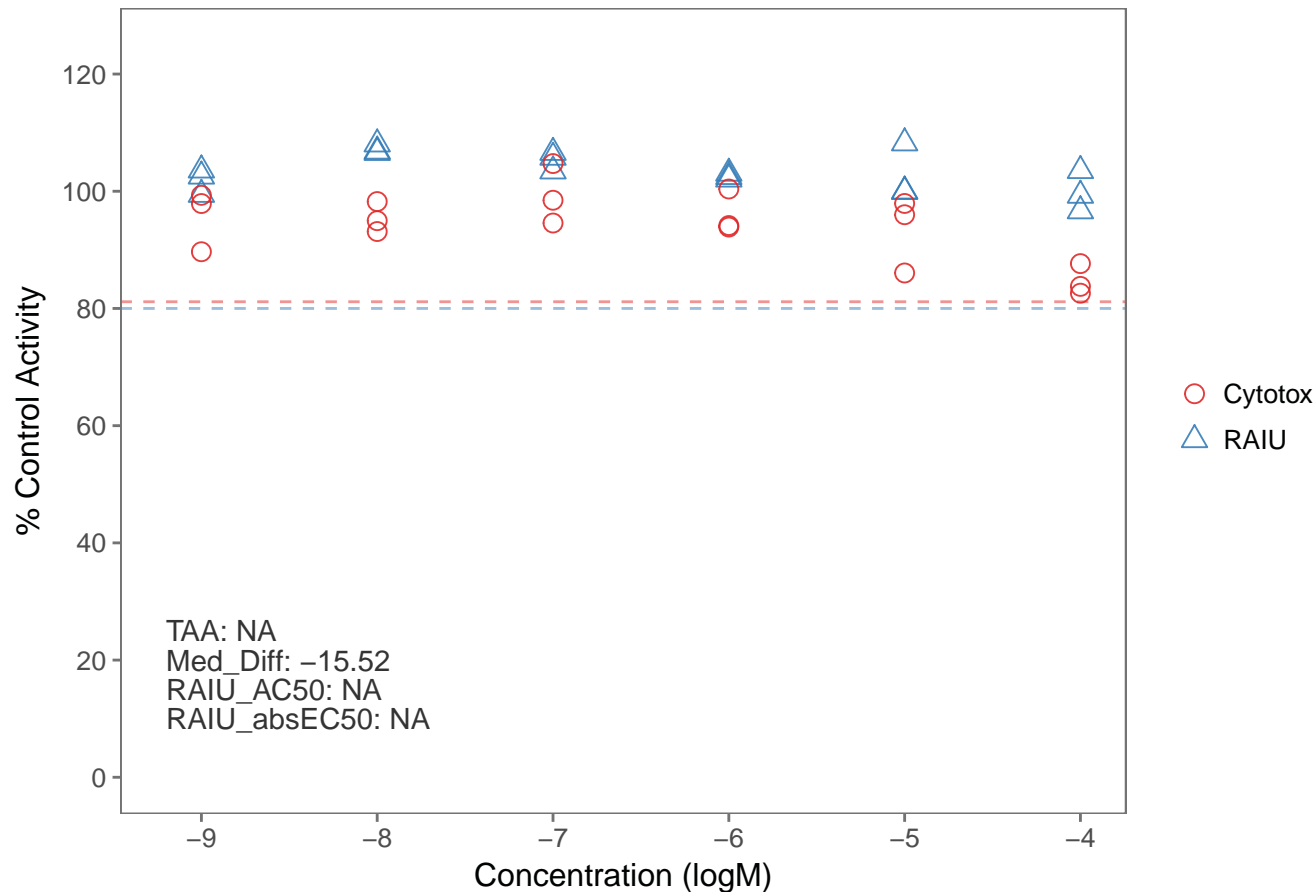



209. SPID: TP0001956E03  
NAME: 2-Hydroxyethyl octyl sulfide  
CAS NO: 3547-33-9

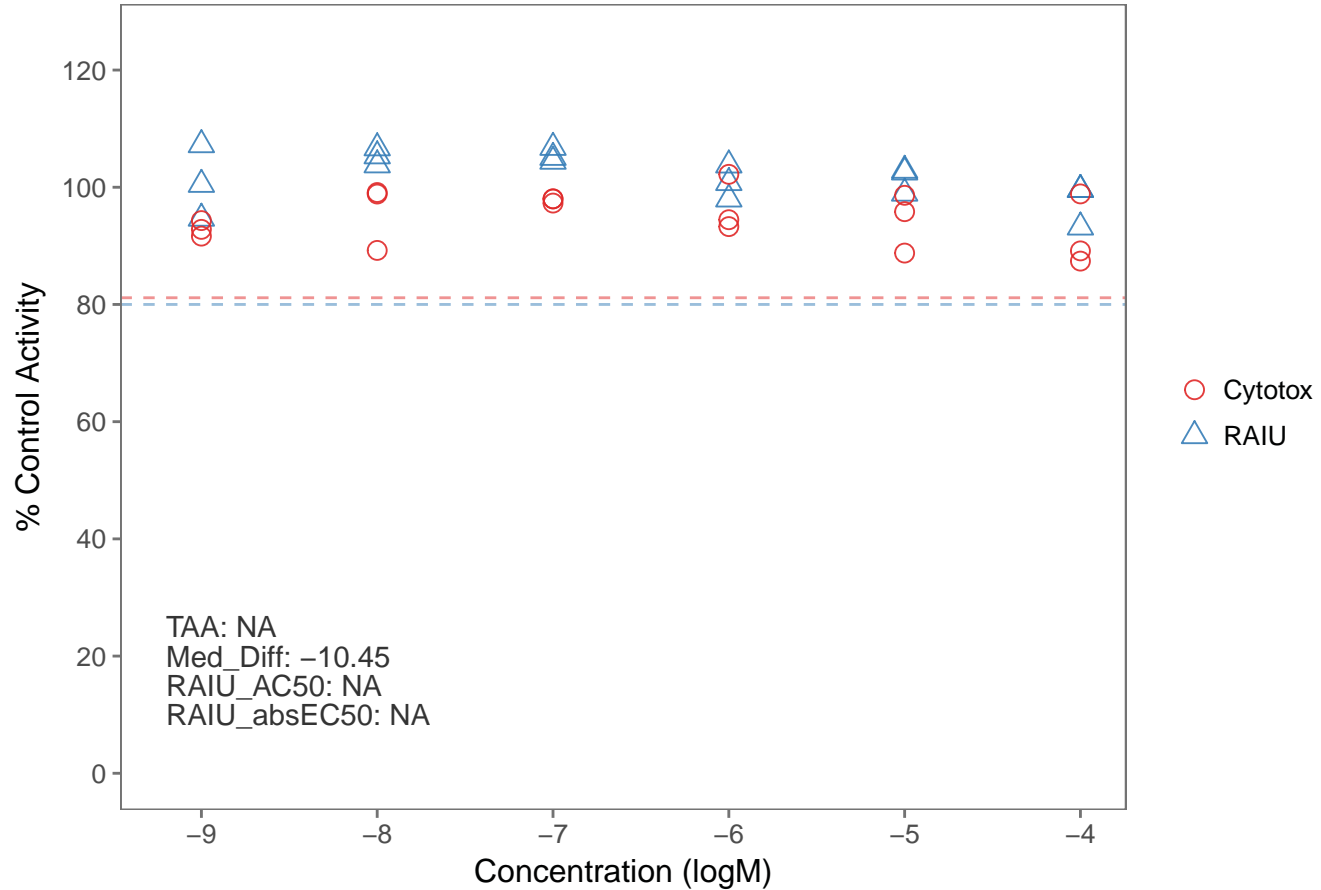

210. SPID: TP0001956F01  
NAME: 2-Methylbutyl isovalerate  
CAS NO: 2445-77-4

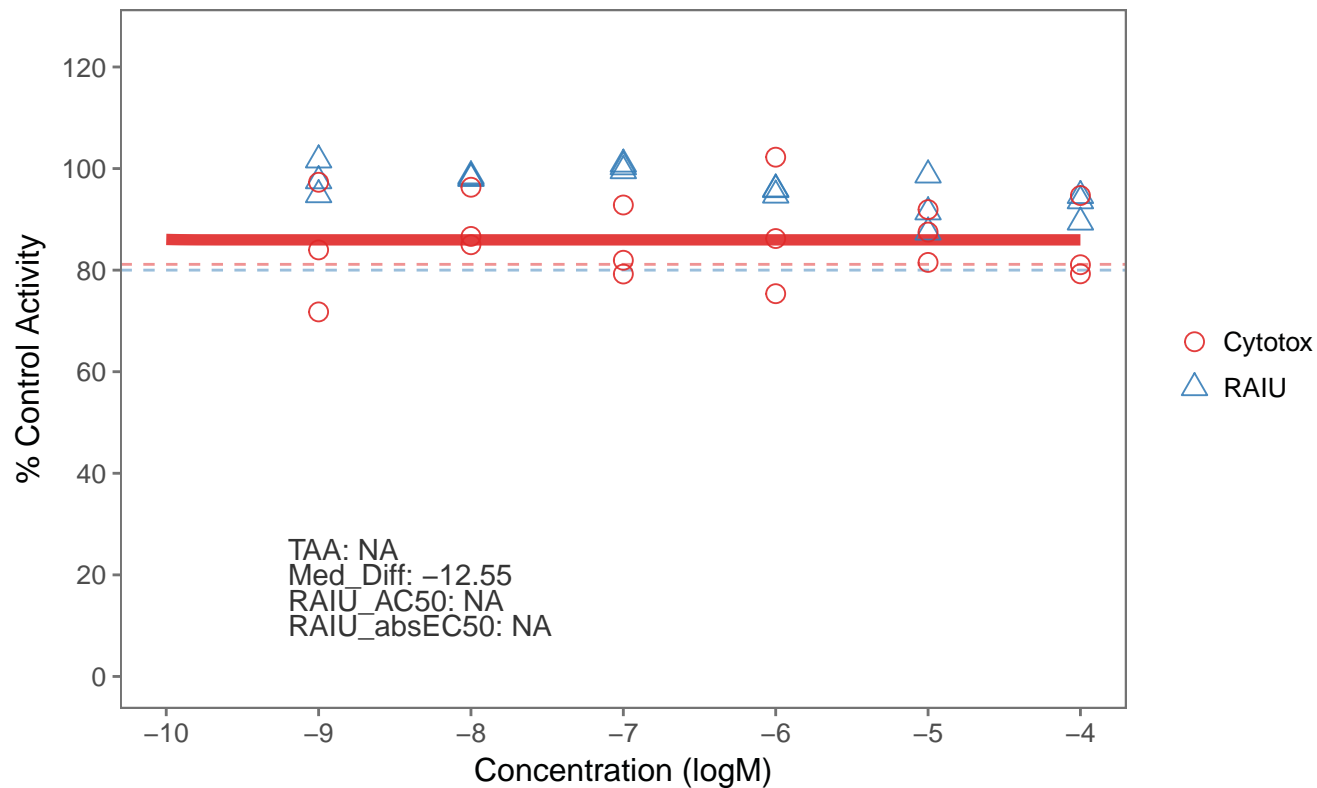

211. SPID: TP0001956G01  
NAME: Dimethylnaphthalene  
CAS NO: 28804-88-8

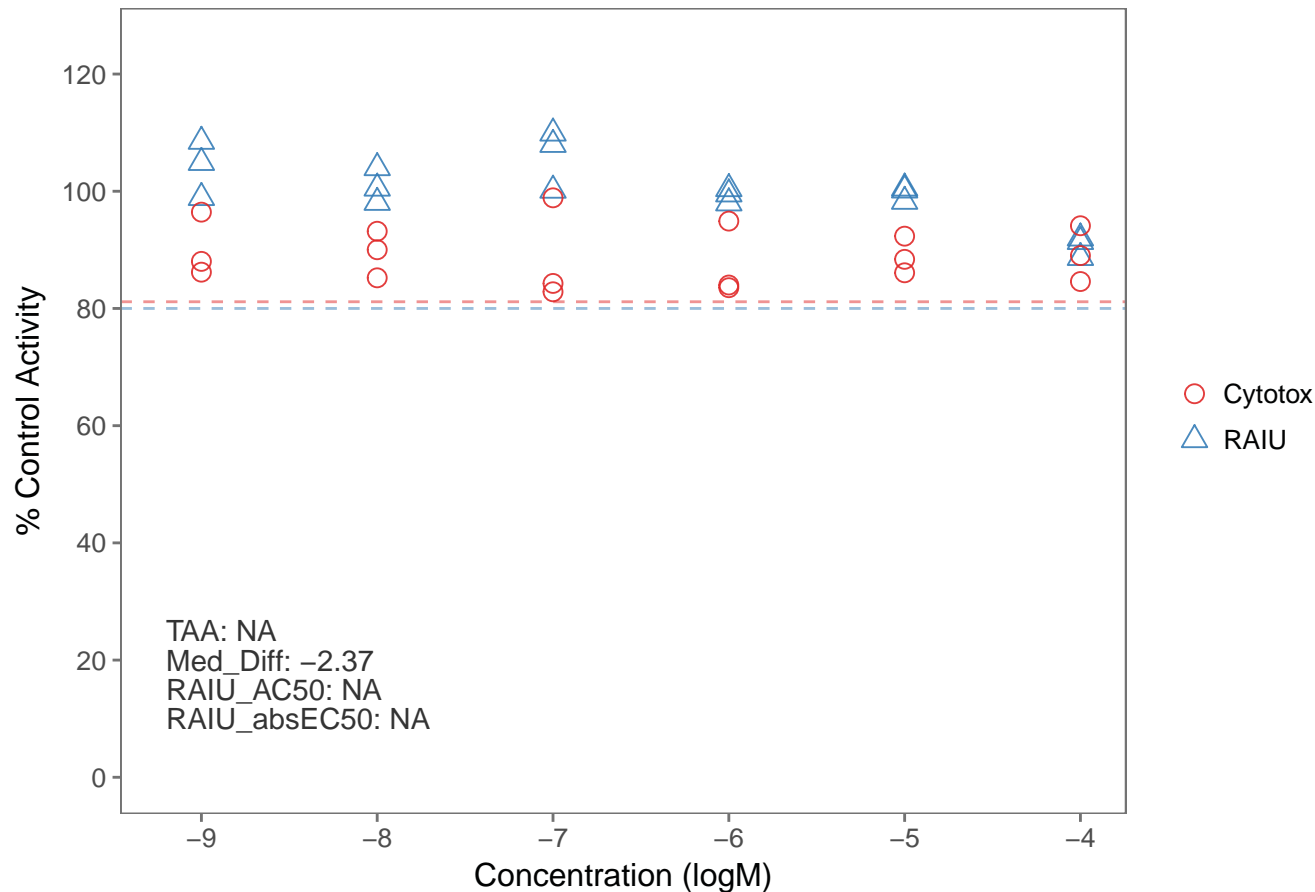

212. SPID: TP0001956G07  
NAME: 4-Methyl-2-tert-butylphenol  
CAS NO: 2409-55-4

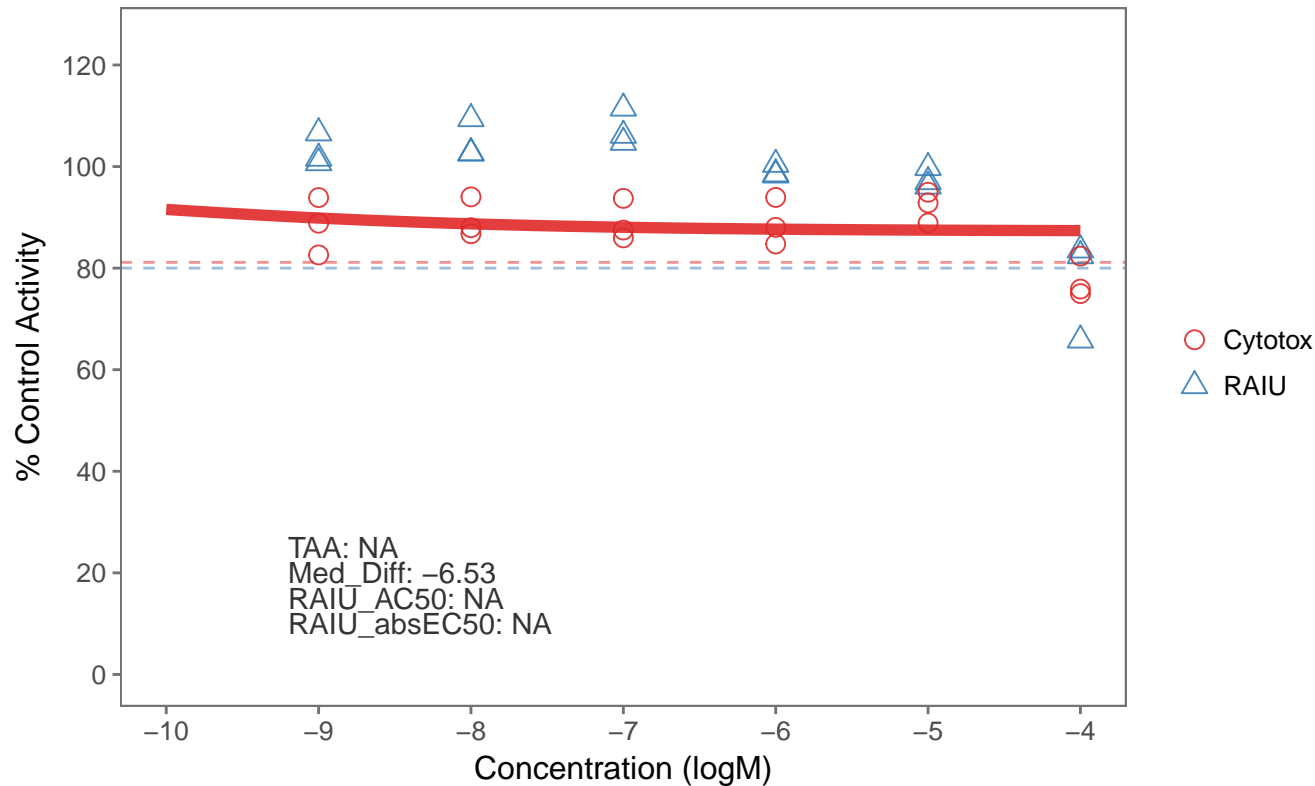

213. SPID: TP0001957A01

NAME: 1-Nonanol

CAS NO: 143-08-8

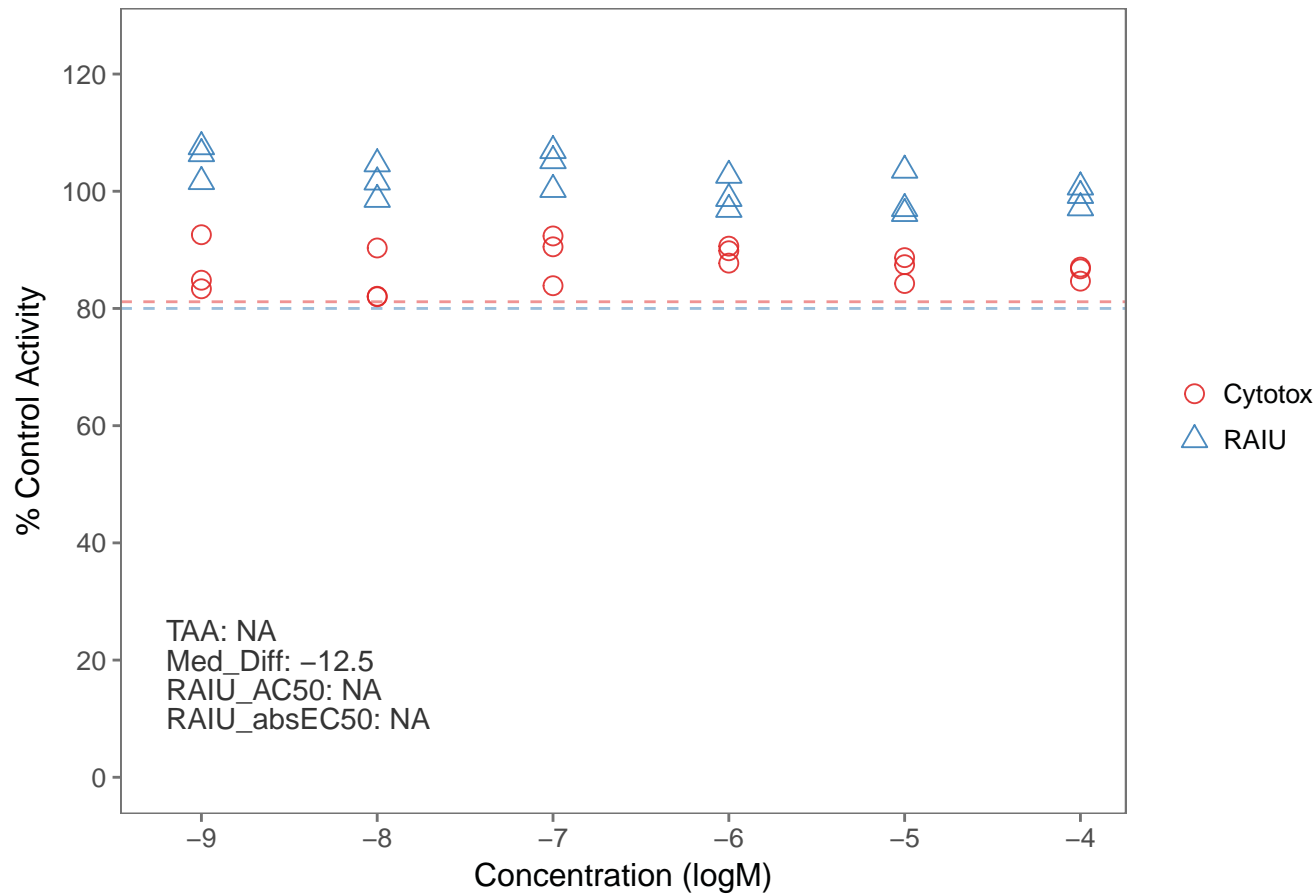

214. SPID: TP0001957B02  
NAME: (9Z,12R)-12-Hydroxyoctadec-9-enoic acid  
CAS NO: 141-22-0

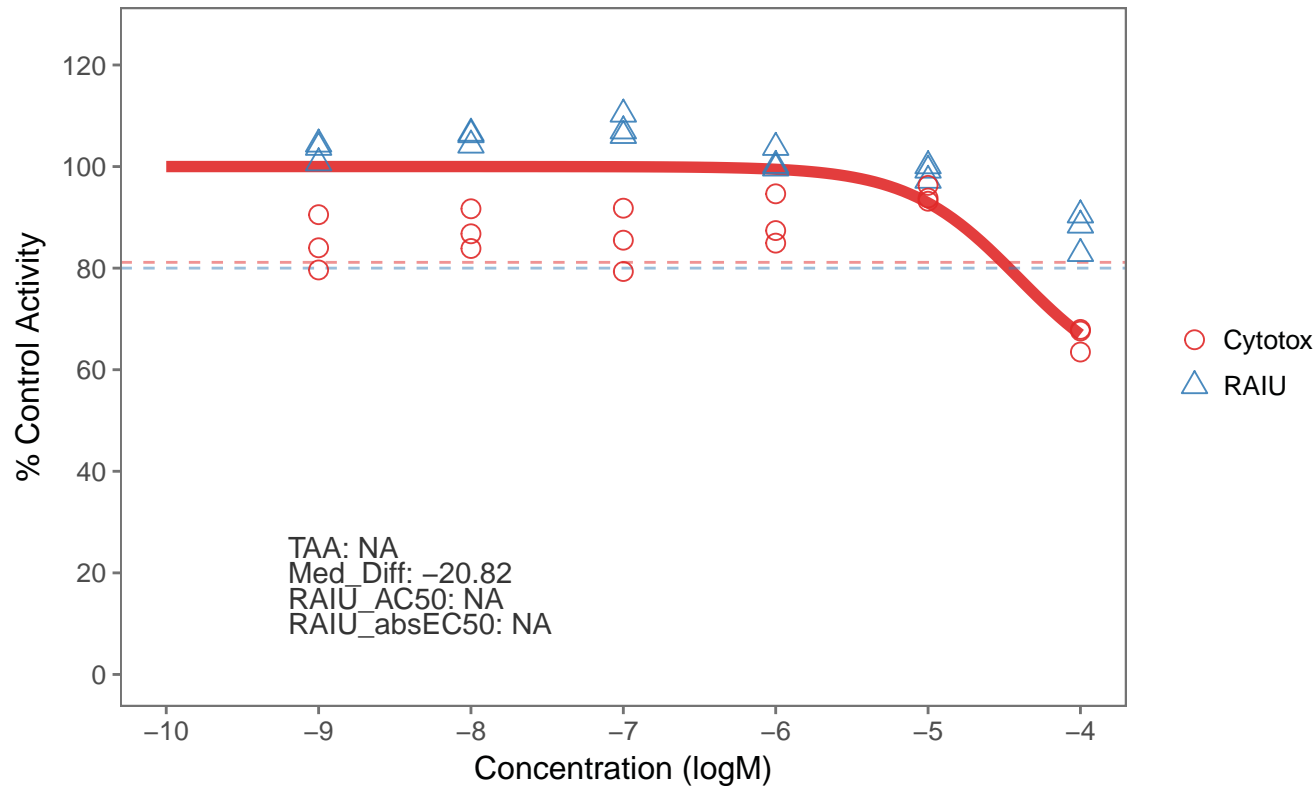

Supplement: NIHMS1763215-supplement-SI_1.pdf [file NIHMS1763215-supplement-SI_1.pdf]
